# Supplementary material for: Establishing a Percutaneous Infection Model Using Zebrafish and a Salmon Pathogen
Source: Biology (Basel). 2021 Feb 22;10(2):166. doi: 10.3390/biology10020166 (PMC7926712; doi:10.3390/biology10020166)
Supplement: Supplementary file 1 [file biology-10-00166-s001.zip]

Archive with 4 entries (3 files):
- biology-1093227-suppl-final/
- biology-1093227-suppl-final/biology-1093227-Data S1.xls
- biology-1093227-suppl-final/biology-1093227-Data S2.xls
- biology-1093227-suppl-final/biology-1093227-suppl-final.pdf
