# Supplementary material for: Establishing a Percutaneous Infection Model Using Zebrafish and a Salmon Pathogen
Source: Biology (Basel). 2021 Feb 22;10(2):166. doi: 10.3390/biology10020166 (PMC7926712; doi:10.3390/biology10020166)
Supplement: Supplementary file 1 [file biology-10-00166-s001.zip › biology-1093227-suppl-final/biology-1093227-Data S1.xls]

## Sheet: 20℃ 28℃ total
Observed OTUs in the infection experiments and their read number in each samples
ID	Taxonomy	Combined Abundance (reads)	28℃ normal 1	28℃ normal 2	28℃ normal 3	28℃ normal 4	28℃ normal 5	28℃ normal water	28℃ pathogen+ 1	28℃ pathogen+ 2	28℃ pathogen+ 3	28℃ pathogen+ 4	28℃ pathogen+ 5	28℃ pathogen+ water	28℃ injured 1	28℃ injured 2	28℃ injured 3	28℃ injured 4	28℃ injureｄ water	28℃ injure+pathogen 1	28℃ injure+pathogen 2	28℃ injure+pathogen 3	28℃ injure+pathogen 4	28℃ injure+pathogen 5	20℃ normal water	20℃ normal 1	20℃ normal 2	20℃ normal 3	20℃ normal 4	20℃ pathogen+water	20℃ pathogen+ 1	20℃ pathogen+ 2	20℃ pathogen+ 3	20℃ pathogen+ 4	20℃ pathogen+ 5	20℃ injured water	20℃ injured 1	20℃ injured 2	20℃ injured 3	20℃ injured 4	20℃ injured+pathogen water	20℃ injured+pathogen 1	20℃ injured+pathogen 2	20℃ injured+pathogen 3	20℃ injured+pathogen 4	20℃ injured+pathogen 5	Sequence
g__Flavobacterium, 1111882	k__Bacteria, p__Bacteroidetes, c__Flavobacteriia, o__Flavobacteriales, f__Flavobacteriaceae, g__Flavobacterium, s__	20	0	0	0	0	0	0	0	0	0	0	0	0	0	0	0	0	12	0	0	0	8	0	0	0	0	0	0	0	0	0	0	0	0	0	0	0	0	0	0	0	0	0	0	0	AGCAGCCGCGGTAATACGGAGGATCCAAGCGTTATCCGGAATCATTGGGTTTAAAGGGTCCGTAGGCGGTTTTATAAGTCAGTGGTGAAATCCGGCAGCTCAACTGTCGAACTGCCATTGATACTGTAGAACTTGAATTACTGTGAAG
f__Enterobacteriaceae, 1111294	k__Bacteria, p__Proteobacteria, c__Gammaproteobacteria, o__Enterobacteriales, f__Enterobacteriaceae, g__, s__	33538	4536	1978	2704	1957	1133	20	1338	312	1852	627	1250	6	1695	627	596	2248	36	2772	934	1472	1293	1835	14	261	140	98	221	17	81	34	58	34	89	38	325	233	157	208	6	222	40	14	16	11	AGCAGCCGCGGTAATACGGAGGGTGCAAGCGTTAATCGGAATTACTGGGCGTAAAGCGCACGCAGGCGGTTTGTTAAGTCAGATGTGAAATCCCCGGGCTCAACCTGGGAACTGCATCTGATACTGGCAAGCTTGAGTCTCGTAGAGGG
f__Enterobacteriaceae, 1110763	k__Bacteria, p__Proteobacteria, c__Gammaproteobacteria, o__Enterobacteriales, f__Enterobacteriaceae, g__, s__	113	0	0	0	0	0	0	0	0	0	0	0	0	0	0	0	0	0	0	0	0	0	0	3	1	0	0	2	1	0	0	2	0	0	1	0	0	0	0	0	3	16	44	23	17	GTGCCAGCAGCCGCGGTAATACGGAGGGTGCAAGCGTTAATCGGAATTACTGGGCGTAAAGCGCACGCAGGCGGTTTGTTAAGTCAGATGTGAGATCCCCGAGCTTAACTTGGGAACTGCATTTGAAACTGGCAAGCTAGAGTCTTGTAGAG
f__Enterobacteriaceae, 1109623	k__Bacteria, p__Proteobacteria, c__Gammaproteobacteria, o__Enterobacteriales, f__Enterobacteriaceae, g__, s__	134	0	0	0	0	0	0	0	0	0	0	0	0	0	0	0	0	0	0	0	0	0	0	0	2	0	2	0	0	1	0	1	0	0	0	0	1	0	0	3	7	18	38	34	27	GTGCCAGCAGCCGCGGTAATACGGAGGGTGCAAGCGTTAATCGGAATTACTGGGCGTAAAGCGCACGCAGGCGGTTTGTTAAGTCAGATGTGAAATCCCCGAGCTTAACTTGGGAACTGCATTTGAAACTGCCAAGCTAGAGTCTTGATAGAA
g__Sphingomonas, 1108960	k__Bacteria, p__Proteobacteria, c__Alphaproteobacteria, o__Sphingomonadales, f__Sphingomonadaceae, g__Sphingomonas, s__	3	0	0	0	0	0	0	0	0	0	0	0	0	0	0	0	0	0	0	0	0	0	0	0	0	0	0	0	0	0	0	0	0	0	3	0	0	0	0	0	0	0	0	0	0	GTGCCAGCAGCCGCGGTAATACGGAGGGAGCTAGCGTTATTCGGAATTACTGGGCGTAAAGCGCACGTAGGCGGCTTTGTAAGTTAGAGGTGAAAGCCTGGAGCTCAACTCCAGAACTGCCTTTAAGACTGCATCGCTTGAATCCAGGAGA
g__Actinomyces, 1108638	k__Bacteria, p__Actinobacteria, c__Actinobacteria, o__Actinomycetales, f__Actinomycetaceae, g__Actinomyces, s__	98	0	0	0	0	0	0	0	0	0	0	0	0	0	0	0	0	0	0	23	0	0	0	0	0	4	10	12	0	0	1	0	0	0	0	0	21	0	21	0	6	0	0	0	0	GTGCCAGCAGCCGCGGTAATACGTAGGGCGCGAGCGTTGTCCGGAATTATTGGGCGTAAAGAGCTCGTAGGCGGCTGGTCGCGTCTGTCGTGAAATCCTCTGGCTTAACTGGGGGCTTGCGGTGGGTACGGGCCGGCTTGAGTGCGGTAGGG
f__Neisseriaceae, 1108591	k__Bacteria, p__Proteobacteria, c__Betaproteobacteria, o__Neisseriales, f__Neisseriaceae, g__, s__	74	0	0	0	0	0	17	0	0	0	0	0	0	0	0	0	0	0	0	0	0	0	0	30	0	0	0	0	25	0	1	0	0	0	1	0	0	0	0	0	0	0	0	0	0	GTGCCAGCAGCCGCGGTAATACGTAGGGTCCAAGCGTTAATCGGAATTACTGGGCGTAAAGCGTCCGCAGGTGGCTTGTTAAGATCGATGTGAAAGCCCCGGGCTCAACCTGGGAACTGCATTGATGACTGGCTCGCTAGAGTACGGCAGAG
o__SBla14, 1108454	k__Bacteria, p__Proteobacteria, c__Betaproteobacteria, o__SBla14, f__, g__, s__	29	0	0	0	0	0	27	0	0	0	0	0	0	0	0	0	0	0	0	0	0	0	0	2	0	0	0	0	0	0	0	0	0	0	0	0	0	0	0	0	0	0	0	0	0	AGCAGCCGCGGTAATACGTAGGGTGCGAGCGTTAATCGGAATTACTGGGCGTAAAGCGTGCGCAGGCGGTTGTGTAAGACAGGTGTGAAATCCCCGGGCTTAACCTGGGAACTGCACTTGTGACTGCACGGCTAGAGTGTGGCAGAGGG
g__Microbacterium, 1108350	k__Bacteria, p__Actinobacteria, c__Actinobacteria, o__Actinomycetales, f__Microbacteriaceae, g__Microbacterium, s__	2	0	0	0	0	0	1	0	0	0	0	0	0	0	0	0	0	1	0	0	0	0	0	0	0	0	0	0	0	0	0	0	0	0	0	0	0	0	0	0	0	0	0	0	0	GCAACGCCGCGTGAGGGATGACGGCCTTCGGGTTGTAAACCTCTTTTAGCAGGGAAGAAGCGAAAGTGACGGTACCTGCAGAAAAAGCGCCGGCTAACTACGTGCCAGCAGCCGCGGTAATACGTAGGGCGCAAGCGTTATCCGGAATT
g__Acinetobacter, 1107335	k__Bacteria, p__Proteobacteria, c__Gammaproteobacteria, o__Pseudomonadales, f__Moraxellaceae, g__Acinetobacter, s__	508	0	0	0	0	0	0	0	0	0	0	0	0	0	0	0	0	0	0	0	0	0	0	0	0	0	0	17	182	4	4	1	0	15	235	8	1	10	30	1	0	0	0	0	0	GTGCCAGCAGCCGCGGTAATACAGAGGGTGCAAGCGTTAATCGGATTTACTGGGCGTAAAGCGCGCGTAGGCGGCTAATTAAGTCAAATGTGAAATCCCCGAGCTTAACTTGGGAATTGCATTCGATACTGGTTAGCTAGAGTGTGGGAGAG
f__Comamonadaceae, 1106674	k__Bacteria, p__Proteobacteria, c__Betaproteobacteria, o__Burkholderiales, f__Comamonadaceae, g__, s__	145	0	0	0	0	0	3	0	0	0	0	0	0	0	0	0	0	0	0	0	0	0	0	14	0	0	0	0	18	0	2	0	0	0	106	0	0	0	0	1	0	1	0	0	0	GTGCCAGCAGCCGCGGTAATACGTAGGGTGCGAGCGTTAATCGGAATTACTGGGCGTAAAGCGTGCGCAGGCGGCTTTGCAAGACAGAGGTGAAATCCCCGGGCTCAACCTGGGAACTGCCTTTGTGACTGCAAGGCTAGAGTACGGCAGAG
f__Comamonadaceae, 1106617	k__Bacteria, p__Proteobacteria, c__Betaproteobacteria, o__Burkholderiales, f__Comamonadaceae, g__, s__	5	0	0	0	0	0	0	0	0	0	0	0	0	0	0	0	0	2	1	2	0	0	0	0	0	0	0	0	0	0	0	0	0	0	0	0	0	0	0	0	0	0	0	0	0	GCAGCCGCGGTAATACGTAGGGTGCAAGCGTTAATCGGAATTACTGGGCGTAAAGCGTGCGCAGGCGGTTATATAAGACAGATGTGAAATCCCCGGGCTCAACCTGGGAACTGCATTTGTGACTGTATAGCTGGAGTACGGCAGAGG
f__Comamonadaceae, 1106324	k__Bacteria, p__Proteobacteria, c__Betaproteobacteria, o__Burkholderiales, f__Comamonadaceae, g__, s__	31	0	0	0	0	0	5	0	0	0	0	0	0	0	0	0	0	26	0	0	0	0	0	0	0	0	0	0	0	0	0	0	0	0	0	0	0	0	0	0	0	0	0	0	0	GCAGCCGCGGTAATACGTAGGGTGCAAGCGTTAATCGGAATTACTGGGCGTAAAGCGTGCGCAGGCGGTGATGTAAGACAGATGTGAAATCCCCGGGCTCAACCTGGGAACTGCCTTTGTGACTGCATAGCTAGAGTACGGTAGAGGG
g__Bradyrhizobium, 1105814	k__Bacteria, p__Proteobacteria, c__Alphaproteobacteria, o__Rhizobiales, f__Bradyrhizobiaceae, g__Bradyrhizobium, s__	191	53	47	0	0	13	0	0	0	0	0	0	4	0	0	1	37	2	0	0	0	0	6	0	15	0	0	0	0	0	0	0	0	2	2	0	4	5	0	0	0	0	0	0	0	AGCAGCCGCGGTAATACGAAGGGGGCTAGCGTTGCTCGGAATCACTGGGCGTAAAGGGTGCGTAGGCGGGTCTTTAAGTCAGGGGTGAAATCCTGGAGCTCAACTCCAGAACTGCCTTTGATACTGAAGATCTTGAGTTCGGGAGAGGT
f__Oxalobacteraceae, 1105574	k__Bacteria, p__Proteobacteria, c__Betaproteobacteria, o__Burkholderiales, f__Oxalobacteraceae, g__, s__	194	0	0	0	0	0	0	0	0	0	0	0	0	0	0	0	0	0	0	0	0	0	0	39	0	0	0	0	2	0	0	0	0	0	0	0	0	0	0	151	1	0	1	0	0	GTGCCAGCAGCCGCGGTAATACGTAGGGTGCAAGCGTTAATCGGAATTACTGGGCGTAAAGCGTGCGCAGGCGGTTTTGTAAGTCTGACGTGAAATCCCCGGGCTTAACCTGGGAATTGCGTTGGAGACTGCAAGGCTGGAGTCTGGCAGA
f__Comamonadaceae, 1104733	k__Bacteria, p__Proteobacteria, c__Betaproteobacteria, o__Burkholderiales, f__Comamonadaceae, g__, s__	850	0	0	0	1	0	581	0	0	0	1	1	263	0	1	0	0	0	0	2	0	0	0	0	0	0	0	0	0	0	0	0	0	0	0	0	0	0	0	0	0	0	0	0	0	AGCAGCCGCGGTAATACGTAGGGTGCAAGCGTTAATCGGAATTACTGGGCGTAAAGCGTGCGCAGGCGGTTTTGTAAGACAGAGGTGAAATCCCCGGGCTCAACCTGGGAACTGCCTTTGTGACTGCAAAGCTGGAGTGCGGCAGAGGG
g__Micrococcus, 1101451	k__Bacteria, p__Actinobacteria, c__Actinobacteria, o__Actinomycetales, f__Micrococcaceae, g__Micrococcus, s__	29	0	0	0	0	0	0	0	0	0	0	0	0	0	0	0	0	0	0	0	0	0	0	0	0	0	0	0	0	0	0	0	0	0	0	0	29	0	0	0	0	0	0	0	0	GTGCCAGCAGCCGCGGTAATACGTAGGGTGCGAGCGTTATCCGGAATTATTGGGCGTAAAGAGCTCGTAGGCGGTTTGTCGCGTCTGTCGTGAAAGTCCGGGGCTTAACCCCGGATCTGCGGTGGGTACGGGCAGACTAGAGTGCAGTAGG
g__Cloacibacterium, 1092833	k__Bacteria, p__Bacteroidetes, c__Flavobacteriia, o__Flavobacteriales, f__[Weeksellaceae], g__Cloacibacterium, s__	87	0	0	0	0	0	0	0	0	0	0	0	0	0	0	0	0	7	0	0	0	0	0	0	0	0	0	12	0	0	0	0	0	0	0	5	0	0	16	0	46	1	0	0	0	GTGCCAGCAGCCGCGGTAATACGGAGGGTGCAAGCGTTATCCGGATTTATTGGGTTTAAAGGGTCCGTAGGCGGACTTATAAGTCAGTGGTGAAAGCCTGTCGCTTAACGATAGAACTGCCATTGATACTGTAAGTCTTGAGTATATTTGAG
g__Granulicatella, 1090059	k__Bacteria, p__Firmicutes, c__Bacilli, o__Lactobacillales, f__Carnobacteriaceae, g__Granulicatella, s__	80	0	0	0	0	0	0	0	0	0	0	0	0	0	0	0	0	0	0	0	0	56	0	0	0	0	5	17	0	0	0	0	0	0	0	0	0	0	0	2	0	0	0	0	0	AGCAGCCGCGGTAATACGTAGGTGGCAAGCGTTGTCCGGATTTATTGGGCGTAAAGCGAGCGCAGGCGGTTCCTTAAGTCTGATGTGAAAGCCCCCGGCTCAACCGGGGAGGGTCATTGGAAACTGGGGAACTTGAGTGCAGAAGAGGA
s__acnes, 1088265	k__Bacteria, p__Actinobacteria, c__Actinobacteria, o__Actinomycetales, f__Propionibacteriaceae, g__Propionibacterium, s__acnes	4748	14	18	193	97	11	1	28	11	88	16	29	0	12	35	24	0	0	9	34	0	93	190	1	147	255	438	792	20	154	35	29	20	42	14	834	376	287	135	6	187	33	11	9	20	CGTGCCAGCAGCCGCGGTGATACGTAGGGTGCGAGCGTTGTCCGGATTTATTGGGCGTAAAGGGCTCGTAGGTGGTTGATCGCGTCGGAAGTGTAATCTTGGGGCTTAACCCTGAGCGTGCTTTCGATACGGGTTGACTTGAGGAAGGTAGGG
g__WAL_1855D, 1086889	k__Bacteria, p__Firmicutes, c__Clostridia, o__Clostridiales, f__[Tissierellaceae], g__WAL_1855D, s__	2	0	0	0	0	0	0	0	0	0	0	0	0	0	0	0	0	0	0	0	0	0	0	0	0	0	0	0	0	0	0	0	0	0	0	0	0	0	1	0	1	0	0	0	0	GTGCCAGCAGCCGCGGTAATACGTAAGGGGCGAGCGTTGTCCGGAATTATTGGGCGTAAAGAGTGCGTAGGCGGCAAATTAAGTCAGATGTGAAAACTAAGGGCTCAACCCATAGATTGCATCTGAAACTGATATGCTTGAGTCAAGGAGA
o__Sphingobacteriales, 1086554	k__Bacteria, p__Bacteroidetes, c__Sphingobacteriia, o__Sphingobacteriales, f__, g__, s__	2	0	0	0	0	0	0	0	0	0	0	0	0	0	0	0	0	0	0	0	0	0	0	0	0	0	0	0	0	0	0	0	0	2	0	0	0	0	0	0	0	0	0	0	0	GTGCCAGCAGCCGCGGTAAGACGAAGGATGCAAGCGTTATCCGGATTCATTGGGTTTAAAGGGAGCGTAGGCGGCCTTGTAAGTCAGTGGTGAAATCTCTCGGCTTAACCGAGAAATTGCCATTGATACTGCAGGGCTTGAGTACAGTTG
g__Staphylococcus, 1084865	k__Bacteria, p__Firmicutes, c__Bacilli, o__Bacillales, f__Staphylococcaceae, g__Staphylococcus, s__	652	0	55	0	0	0	1	0	0	0	42	0	0	0	0	37	5	0	0	0	68	29	122	0	30	32	19	68	0	23	1	3	0	0	0	70	31	13	0	0	0	0	0	0	3	AGCAGCCGCGGTAATACGTAGGTGGCAAGCGTTATCCGGAATTATTGGGCGTAAAGCGCGCGTAGGCGGTTTTTTAAGTCTGATGTGAAAGCCCACGGCTCAACCGTGGAGGGTCATTGGAAACTGGAAAACTTGAGTGCAGAAGAGGA
g__Lysinibacillus, 1084045	k__Bacteria, p__Firmicutes, c__Bacilli, o__Bacillales, f__Planococcaceae, g__Lysinibacillus, s__	17	0	0	0	0	0	0	0	0	0	0	0	0	0	0	0	0	0	0	0	0	0	0	0	0	0	0	0	0	0	0	0	0	0	0	0	0	17	0	0	0	0	0	0	0	GTGCCAGCAGCCGCGGTAATACGTAGGTGGCAAGCGTTGTCCGGAATTATTGGGCGTAAAGCGCGCGCAGGCGGTCCTTTAAGTCTGATGTGAAAGCCCACGGCTCAACCGTGGAGGGTCATTGGAAACTGGGGGACTTGAGTGCAGAAGA
f__Xanthomonadaceae, 1083508	k__Bacteria, p__Proteobacteria, c__Gammaproteobacteria, o__Xanthomonadales, f__Xanthomonadaceae, g__, s__	4216	240	91	487	133	242	0	443	38	303	61	187	0	289	195	28	202	2	178	0	218	99	365	4	142	6	16	42	1	3	21	10	3	17	1	3	37	53	25	4	27	0	0	0	0	AGCAGCCGCGGTAATACGAAGGGTGCAAGCGTTACTCGGAATTACTGGGCGTAAAGCGTGCGTAGGTGGTCGTTTAAGTCCGTTGTGAAAGCCCTGGGCTCAACCTGGGAACTGCAGTGGATACTGGGCGACTAGAGTGTGGTAGAGGG
g__Moraxella, 1083037	k__Bacteria, p__Proteobacteria, c__Gammaproteobacteria, o__Pseudomonadales, f__Moraxellaceae, g__Moraxella, s__	23	0	0	0	0	0	0	0	0	0	0	0	0	0	0	0	0	0	0	0	0	0	0	0	0	0	23	0	0	0	0	0	0	0	0	0	0	0	0	0	0	0	0	0	0	GTGCCAGCAGCCGCGGTAATACAGAGGGTGCAAGCGTTAATCGGAATTACTGGGCGTAAAGCGCGCGTAGGTGGTTATTTAAGTCAGATGTGAAAGCCCCGGGCTTAACCTGGGAACTGCATCTGATACTGGATAACTAGAGTAGGTGAGA
g__Streptococcus, 1082539	k__Bacteria, p__Firmicutes, c__Bacilli, o__Lactobacillales, f__Streptococcaceae, g__Streptococcus, s__	44	0	0	0	0	0	0	0	0	0	0	0	0	0	0	0	0	0	0	0	0	0	0	0	0	0	22	7	0	0	0	0	0	0	0	5	0	10	0	0	0	0	0	0	0	GTGCCAGCAGCCGCGGTAATACGTAGGTCCCGAGCGTTGTCCGGATTTATTGGGCGTAAAGCGAGCGCAGGCGGTTAGATAAGTCTGAAGTTAAAGGCTGTGGCTTAACCATAGTATGCTTTGGAAACTGTTTAACTTGAGTGCAGAAGGG
g__Corynebacterium, 1080820	k__Bacteria, p__Actinobacteria, c__Actinobacteria, o__Actinomycetales, f__Corynebacteriaceae, g__Corynebacterium, s__	5	0	0	0	0	0	0	0	0	0	0	0	0	0	0	0	0	0	0	0	0	0	0	0	0	0	5	0	0	0	0	0	0	0	0	0	0	0	0	0	0	0	0	0	0	GTGCCAGCAGCCGCGGTAATACGTAGGGTGCGAGCGTTGTCCGGAATTACTGGGCGTAAAGAGCTCGTAGGTGGTTTGTTGCGTCGTCTGTGAAATTCCGGGGCTTAACTTCGGGGTGGCAGGCGATACGGGCATAACTAGAGTGCTGTAG
g__Streptococcus, 1078207	k__Bacteria, p__Firmicutes, c__Bacilli, o__Lactobacillales, f__Streptococcaceae, g__Streptococcus, s__	296	90	0	0	0	15	0	0	0	0	0	0	0	0	0	0	0	0	0	0	0	0	0	0	17	6	31	22	0	5	2	0	0	0	0	58	15	24	0	0	8	0	1	0	2	GTGCCAGCAGCCGCGGTAATACGTAGGTCCCGAGCGTTGTCCGGATTTATTGGGCGTAAAGCGAGCGCAGGCGGTTAGATAAGTCTGAAGTTAAAGGCTGTGGCTTAACCATAGTACGCTTTGGAAACTGTTTAACTTGAGTGCAAGAGGGG
g__Planctomyces, 1076737	k__Bacteria, p__Planctomycetes, c__Planctomycetia, o__Planctomycetales, f__Planctomycetaceae, g__Planctomyces, s__	8	0	0	0	0	0	0	0	0	0	0	0	0	0	0	0	0	0	0	0	0	0	0	0	0	0	0	0	0	0	0	0	0	8	0	0	0	0	0	0	0	0	0	0	0	GTGCCAGCAGCCGCGGTAATACGAACTGTGCAAACGTTATTCGGAATCACTGGGCTTAAAGGGTGCGTAGGCGGTTTGTTAAGTAGGGTGTGAAAGCCCCCGGCTCAACCGGGGAATTGCGCCCTAAACTGGCGGACTAGAGTGAGATAGG
g__Alloiococcus, 1075821	k__Bacteria, p__Firmicutes, c__Bacilli, o__Lactobacillales, f__Aerococcaceae, g__Alloiococcus, s__	2	0	0	0	0	0	0	0	0	0	0	0	0	0	0	0	0	0	0	0	0	0	0	0	0	0	0	0	0	0	0	0	0	0	0	0	0	0	0	2	0	0	0	0	0	GTGCCAGCAGCCGCGGTAATACGTAGGTGACAAGCGTTGTCCGGATTTATTGGGCGTAAAGGGAGCGCAGGCGGTCTGTTTAGTCTAATGTGAAAGCCCACGGCTTAACCGTGGAACGGCATTGGAAACTGACAGACTTGAATGTAGAAGA
f__Gemellaceae, 1074210	k__Bacteria, p__Firmicutes, c__Bacilli, o__Gemellales, f__Gemellaceae, g__, s__	38	0	0	0	0	0	0	0	0	0	10	0	0	0	0	7	0	0	0	0	0	0	0	0	0	9	1	0	1	0	0	0	0	0	0	8	0	0	0	0	0	0	0	2	0	GTGCCAGCAGCCGCGGTAATACGTAGGTGGCAAGCGTTGTCCGGAATTATTGGGCGTAAAGCGCGCGCAGGTGGTTTAATAAGTCTGATGTGAAAGCCCACGGCTCAACCGTGGAGGGTCATTGGAAACTGTTAAACTTGAGTGCAGGAGAG
f__Oxalobacteraceae, 1074016	k__Bacteria, p__Proteobacteria, c__Betaproteobacteria, o__Burkholderiales, f__Oxalobacteraceae, g__, s__	4154	0	0	0	0	0	1	0	0	0	0	0	0	0	0	0	0	0	0	0	0	0	0	5	0	0	3	0	975	0	0	1	0	3	3077	29	15	4	24	10	1	0	2	3	1	GTGCCAGCAGCCGCGGTAATACGTAGGGTGCAAGCGTTAATCGGAATTACTGGGCGTAAAGCGTGCGCAGGCGGTTTTGTAAGACTGTCGTGAAATCCCCGGGCTTAACCTGGGAATGGCGATGGTGACTGCAAGGCTAGAGTTTGGCAGAG
o__Actinomycetales, 1072854	k__Bacteria, p__Actinobacteria, c__Actinobacteria, o__Actinomycetales, f__, g__, s__	231	0	0	0	0	0	13	0	0	0	0	0	2	0	0	0	0	216	0	0	0	0	0	0	0	0	0	0	0	0	0	0	0	0	0	0	0	0	0	0	0	0	0	0	0	AGCAGCCGCGGTAATACGTAGGGTGCAAGCATTGTCCGGATTTATTGGGCGTAAAGAGCTCGTAGGCGGCTTGTCACGTCGGATGTGAAAACTCGGGGCTCAACCCCGAGCCTGCATTCGATACGGGCTAGCTAGAGTGTCGCAGGGGA
g__Pedobacter, 1068470	k__Bacteria, p__Bacteroidetes, c__Sphingobacteriia, o__Sphingobacteriales, f__Sphingobacteriaceae, g__Pedobacter, s__	21010	2	48	195	3	2	5471	1	4	0	0	0	518	8	3	0	0	130	0	10	0	6	1	721	287	1272	1364	583	594	1177	122	2300	1680	506	169	608	204	638	425	1418	95	38	26	26	355	CGTGCCAGCAGCCGCGGTAATACGGAGGATCCAAGCGTTATCCGGATTTATTGGGTTTAAAGGGTGCGTAGGCGGCCTGTTAAGTCAGGGGTGAAAGACGGTAGCTCAACTATCGCAGTGCCCTTGATACTGATGGGCTTGAATGGACTAGAG
f__Gemellaceae, 1065569	k__Bacteria, p__Firmicutes, c__Bacilli, o__Gemellales, f__Gemellaceae, g__, s__	87	0	0	0	0	0	0	0	0	0	0	0	0	0	0	0	0	0	0	0	0	0	0	0	0	0	36	10	0	1	0	0	0	0	0	27	13	0	0	0	0	0	0	0	0	GTGCCAGCAGCCGCGGTAATACGTAGGTGGCGAGCGTTGTCCGGATTTATTGGGCGTAAAGGGAGTGTAGGCGGTCTTTTAAGTCTGATGTGAAAGCCCACGGCTCAACCGTGGAGGGTCATTGGAAACTGGGAGACTTGAGTGCAGAAGA
g__Mycobacterium, 1062748	k__Bacteria, p__Actinobacteria, c__Actinobacteria, o__Actinomycetales, f__Mycobacteriaceae, g__Mycobacterium, s__	327	0	0	0	0	0	34	0	1	0	0	0	1	0	0	0	0	127	0	0	0	0	0	1	0	56	0	4	11	0	2	0	0	21	2	13	29	0	4	4	14	1	0	1	1	GTGCCAGCAGCCGCGGTAATACGTAGGGTCCGAGCGTTGTCCGGAATTACTGGGCGTAAAGAGCTCGTAGGTGGTTTGTCGCGTTGTTCGTGAAAACTCACAGCTTAACTGTGGGCGTGCGGGCGATACGGGCAGACTAGAGTACTGCAGGGGA
g__Methylobacterium, 1060565	k__Bacteria, p__Proteobacteria, c__Alphaproteobacteria, o__Rhizobiales, f__Methylobacteriaceae, g__Methylobacterium, s__	103	0	0	0	0	0	0	24	29	0	0	0	0	0	0	0	0	0	0	0	44	0	0	0	0	0	0	0	0	0	0	0	0	0	0	6	0	0	0	0	0	0	0	0	0	AGCAGCCGCGGTAATACGAAGGGGGCTAGCGTTGCTCGGAATCACTGGGCGTAAAGGGCGCGTAGGCGGCCATTCAAGTCGGGGGTGAAAGCCTGTGGCTCAACCACAGAATTGCCTTCGATACTGTTTGGCTTGAGTCTGGTAGAGGT
g__Janthinobacterium, 1060517	k__Bacteria, p__Proteobacteria, c__Betaproteobacteria, o__Burkholderiales, f__Oxalobacteraceae, g__Janthinobacterium, s__	27818	0	0	0	0	0	1	1	0	0	0	0	0	0	0	0	0	22	0	0	0	0	0	556	2	1	88	55	1400	28	8	24	27	2	11575	22	19	68	26	12248	56	29	49	1098	413	CGTGCCAGCAGCCGCGGTAATACGTAGGGTGCAAGCGTTAATCGGAATTACTGGGCGTAAAGCGTGCGCAGGCGGTTTTGTAAGACTGTCGTGAAATCCCCGGGCTCAACCTGGGAATGGCGATGGTGACTGCAAGGCTAGAGTTTGGCAGAG
g__Granulicatella, 1059729	k__Bacteria, p__Firmicutes, c__Bacilli, o__Lactobacillales, f__Carnobacteriaceae, g__Granulicatella, s__	46	0	0	0	0	29	0	0	0	0	0	0	0	0	0	0	0	0	0	0	0	0	0	0	0	0	0	7	0	0	0	0	0	0	0	10	0	0	0	0	0	0	0	0	0	AGCAGCCGCGGTAATACGTAGGTGGCAAGCGTTGTCCGGATTTATTGGGCGTAAAGCGAGCGCAGGCGGTCAATTAAGTCTGATGTGAAAGCCCCCGGCTCAACCGGGGAGGGTCATTGGAAACTGGTTGACTTGAGTGCAGAAGAGG
g__Pedobacter, 1053703	k__Bacteria, p__Bacteroidetes, c__Sphingobacteriia, o__Sphingobacteriales, f__Sphingobacteriaceae, g__Pedobacter, s__	123	0	0	0	0	0	100	0	0	0	0	0	0	0	0	0	0	0	0	0	0	0	0	1	0	1	0	5	1	7	0	3	4	0	0	0	0	1	0	0	0	0	0	0	0	AGCAGCCGCGGTAATACGGAGGATCCAAGCGTTATCCGGATTTATTGGGTTTAAAGGGTGCGTAGGCGGCCTGTTAAGTCAGGGGTGAAAGACGGTAGCTCAACTATCGCAGTGCCCTTGATACTGATGGGCTTGAATACACTAGAGGT
f__Comamonadaceae, 1051459	k__Bacteria, p__Proteobacteria, c__Betaproteobacteria, o__Burkholderiales, f__Comamonadaceae, g__, s__	4	0	0	0	0	0	0	0	0	0	0	0	0	0	1	0	0	1	0	0	0	0	0	0	0	1	1	0	0	0	0	0	0	0	0	0	0	0	0	0	0	0	0	0	0	GTGCCAGCAGCCGCGGTAATACGTAGGGTGCGAGCGTTAATCGGAATTACTGGGCGTAAAGCGTGCGCAGGCGGTTATGTAAGACAGATGTGAAATCCCCGGGCTCAACCTGGGAATTGCATTAGTGACTGCATAGCTTGAGTGCGGCAGAG
g__Corynebacterium, 1050608	k__Bacteria, p__Actinobacteria, c__Actinobacteria, o__Actinomycetales, f__Corynebacteriaceae, g__Corynebacterium, s__	36	0	0	0	0	0	0	0	0	36	0	0	0	0	0	0	0	0	0	0	0	0	0	0	0	0	0	0	0	0	0	0	0	0	0	0	0	0	0	0	0	0	0	0	0	GCAGCCGCGGTAATACGTAGGGTGCGAGCGTTGTCCGGATTTACTGGGCGTAAAGGGCTCGTAGGTGGTGTGTCGCGTCGTCTGTGTAATCCAGGGGCTTAACTTTTGGTTGGCAGGCGATACGGGCATTGCTTGAGTGCTGTAGGG
s__wittichii, 1048497	k__Bacteria, p__Proteobacteria, c__Alphaproteobacteria, o__Sphingomonadales, f__Sphingomonadaceae, g__Sphingomonas, s__wittichii	41	0	0	0	0	0	0	0	0	0	0	0	0	0	0	0	0	0	0	0	0	0	0	0	0	0	0	0	11	0	0	0	0	0	30	0	0	0	0	0	0	0	0	0	0	GTGCCAGCAGCCGCGGTAATACGGAGGGGGCTAGCGTTGTTCGGAATTACTGGGCGTAAAGCGTACGTAGGCGGTTTTGTAAGTTAGAGGTGAAAGCCCGGAGCTCAACTTCGGAATTGCCTTTAAGACTGCATCACTTGAACGTCGGAGA
g__Corynebacterium, 1047041	k__Bacteria, p__Actinobacteria, c__Actinobacteria, o__Actinomycetales, f__Corynebacteriaceae, g__Corynebacterium, s__	945	128	0	0	0	0	0	0	0	34	18	34	0	0	0	0	92	0	0	0	0	13	85	0	37	6	72	155	1	16	3	0	1	0	1	140	41	11	1	0	55	1	0	0	0	GTGCCAGCAGCCGCGGTAATACGTAGGGTGCGAGCGTTGTCCGGAATTACTGGGCGTAAAGAGCTCGTAGGCGGTTTGTCACGTCGTCTGTGAAATCCTAGGGCTTAACCCTGGACGTGCAGGCGATACGGGCTGACTTGAGTACTACAGGG
f__Oxalobacteraceae, 1043045	k__Bacteria, p__Proteobacteria, c__Betaproteobacteria, o__Burkholderiales, f__Oxalobacteraceae, g__, s__	1478	0	0	0	0	0	0	0	0	0	0	0	0	0	0	0	0	0	0	0	0	0	0	68	0	0	0	0	8	0	0	0	0	0	1	0	0	0	0	1385	1	5	1	6	3	GTGCCAGCAGCCGCGGTAATACGTAGGGTGCAAGCGTTAATCGGAATTACTGGGCGTAAAGCGTGCGCAGGCGGTTTTGTAAGTCTGACGTGAAAGCCCCGGGCTCAACCTGGGAATTGCGTTGGAGACTGCAAGGCTTGAATCTGGCAGAG
f__Rhodocyclaceae, 1040172	k__Bacteria, p__Proteobacteria, c__Betaproteobacteria, o__Rhodocyclales, f__Rhodocyclaceae, g__, s__	18	0	0	0	0	0	13	0	0	0	0	0	0	0	0	0	0	5	0	0	0	0	0	0	0	0	0	0	0	0	0	0	0	0	0	0	0	0	0	0	0	0	0	0	0	GCAGCCGCGGTAATACGTAGGGTGCGAGCGTTAATCGGAATTACTGGGCGTAAAGCGTGCGCAGGCGGTTGTGTAAGACAGGTGTGAAATCCCCGGGCTTAACCTGGGAACTGCGCTTGTGACTGCACGGCTAGAGTACGGCAGAGGG
f__Comamonadaceae, 1039594	k__Bacteria, p__Proteobacteria, c__Betaproteobacteria, o__Burkholderiales, f__Comamonadaceae, g__, s__	8394	0	0	0	0	0	498	1	8	0	0	0	6	0	0	0	0	154	0	0	0	0	0	117	1	0	34	0	1335	9	1	2	17	5	5788	1	1	23	7	312	4	8	12	41	9	CGTGCCAGCAGCCGCGGTAATACGTAGGGTGCAAGCGTTAATCGGAATTACTGGGCGTAAAGCGTGCGCAGGCGGTTATGTAAGACAGAGGTGAAATCCCCGGGCTCAACCTGGGAACTGCCTTTGTGACTGCATAGCTAGAGTACGGTAGAG
g__Chryseobacterium, 1039092	k__Bacteria, p__Bacteroidetes, c__Flavobacteriia, o__Flavobacteriales, f__[Weeksellaceae], g__Chryseobacterium, s__	35	0	0	0	0	0	0	0	8	0	0	0	0	0	0	0	0	0	0	0	27	0	0	0	0	0	0	0	0	0	0	0	0	0	0	0	0	0	0	0	0	0	0	0	0	GCAGCCGCGGTAATACGGAGGGTGCAAGCGTTATCCGGATTTATTGGGTTTAAAGGGTCCGTAGGCGGACTCGTAAGTCAGTGGTGAAATCTCATAGCTTAACTATGAAACTGCCATTGATACTGCGGGTCTTGAGTAAAGTAGAAG
f__Sporichthyaceae, 1039041	k__Bacteria, p__Actinobacteria, c__Actinobacteria, o__Actinomycetales, f__Sporichthyaceae, g__, s__	25	0	0	0	0	0	0	0	0	0	0	0	0	0	0	0	0	0	0	0	0	0	0	0	0	0	0	0	0	0	0	0	0	0	0	25	0	0	0	0	0	0	0	0	0	GTGCCAGCAGCCGCGGTAATACGTAGGGTGCAAGCGTTGTCCGGAATTATTGGGCGTAAAGAGCTCGTAGGCGGTCTGTCGCGTCGGCTGTGAAAACTTGGGGCTCAACCCCAAGCCTGCAGTCGATACGGGCAGACTAGAGTGCGGTAGG
g__Acinetobacter, 1009894	k__Bacteria, p__Proteobacteria, c__Gammaproteobacteria, o__Pseudomonadales, f__Moraxellaceae, g__Acinetobacter, s__	14	1	0	1	2	1	0	1	0	0	0	0	0	0	0	0	2	1	1	0	0	0	1	0	0	0	0	2	0	0	0	0	0	0	0	0	0	0	0	0	0	0	0	0	1	AGCAGCCGCGGTAATACAGAGGGTGCGAGCGTTAATCGGATTTACTGGGCGTAAAGCGTGCGTAGGCGGCTTTTTAAGTCGGATGTGGAATCCCTGAGCTTAACTTAGAAATTGCATTCGATACTGGAAAGCTAGAGTATGGGAGAGG
f__Caulobacteraceae, 1009440	k__Bacteria, p__Proteobacteria, c__Alphaproteobacteria, o__Caulobacterales, f__Caulobacteraceae, g__, s__	176	0	0	0	1	0	141	0	0	0	0	0	0	0	0	0	0	29	0	0	0	0	0	2	0	0	0	0	0	0	0	0	0	0	3	0	0	0	0	0	0	0	0	0	0	AGCAGCCGCGGTAATACGAAGGGGGCTAGCGTTGCTCGGAATTACTGGGCGTAAAGGGCGCGTAGGCGGACAGTTTAGTCAGAGGTGAAAGCCCAGGGCTCAACCTTGGAATTGCCTTTGATACTGGCTGTCTTGAGTACGGGAGAGGT
g__Sphingomonas, 1003206	k__Bacteria, p__Proteobacteria, c__Alphaproteobacteria, o__Sphingomonadales, f__Sphingomonadaceae, g__Sphingomonas, s__	3	0	0	0	0	0	0	0	0	3	0	0	0	0	0	0	0	0	0	0	0	0	0	0	0	0	0	0	0	0	0	0	0	0	0	0	0	0	0	0	0	0	0	0	0	GCAGCCGCGGTAATACGGAGGGAGCTAGCGTTGTTCGGAATTACTGGGCGTAAAGCGCACGTAGGCGGCTTTGTAAGTTAGAGGTGAAAGCCTGGAGCTCAACTCCAGAATTGCCTTTAAGACTGCATCGCTTGAATCCAGGAGAGG
o__Actinomycetales, 995960	k__Bacteria, p__Actinobacteria, c__Actinobacteria, o__Actinomycetales, f__, g__, s__	31	0	0	0	0	0	0	0	0	0	0	0	0	0	31	0	0	0	0	0	0	0	0	0	0	0	0	0	0	0	0	0	0	0	0	0	0	0	0	0	0	0	0	0	0	GCAGCCGCGGTAATACGTAGGGCGCAAGCGTTGTCCGGAATTATTGGGCGTAAAGAGCTTGTAGGTGGCTTGTCGCGTCTGCCGTGAAAACCCGAGGCTCAACCTCGGGCGTGCGGTGGGTACGGGCAGGCTAGAGTGTGGTAGGGG
g__Kaistobacter, 989109	k__Bacteria, p__Proteobacteria, c__Alphaproteobacteria, o__Sphingomonadales, f__Sphingomonadaceae, g__Kaistobacter, s__	3	0	0	0	0	0	0	0	0	0	0	0	3	0	0	0	0	0	0	0	0	0	0	0	0	0	0	0	0	0	0	0	0	0	0	0	0	0	0	0	0	0	0	0	0	GCAGCCGCGGTAATACGGAGGGGGCTAGCGTTGTTCGGAATTACTGGGCGTAAAGCGCACGTAGGCGGCTTTGTAAGTTAGAGGTGAAAGCCCAGGGCTCAACCCTGGAATTGCCTTTAAGACTGCATCGCTTGAATCATGGAGAGG
o__Actinomycetales, 979315	k__Bacteria, p__Actinobacteria, c__Actinobacteria, o__Actinomycetales, f__, g__, s__	34	0	0	0	0	0	0	0	0	0	0	0	0	0	0	0	0	0	0	0	0	0	0	0	0	0	0	34	0	0	0	0	0	0	0	0	0	0	0	0	0	0	0	0	0	GTGCCAGCAGCCGCGGTAATACGTAGGGTGCGAGCGTTGTCCGGAATTACTGGGCGTAAAGAGCTCGTAGGTGGTTTGTCGCGTCGTCTGTGAAATCCCGGGGCTTAACTTCGGGCGTGCAGGCGATACGGGCATAACTAGAGTGCTGTAG
f__Halomonadaceae, 979107	k__Bacteria, p__Proteobacteria, c__Gammaproteobacteria, o__Oceanospirillales, f__Halomonadaceae, g__, s__	11	0	0	0	0	0	0	0	0	0	0	0	0	0	0	0	0	0	0	0	0	0	0	0	8	0	0	0	0	0	1	0	0	0	0	1	0	0	0	0	0	0	1	0	0	GTGCCAGCAGCCGCGGTAATACGGAGGGTGCGAGCGTTAATCGGAATTACTGGGCGTAAAGCGCGCGTAGGCGGCGTGATAAGCCGGTTGTGAAAGCCCCGGGCTCAACCTGGGAACGGCATCCGGAACTGTCAGGCTAGAGTGCAGGAGA
g__Mycobacterium, 978664	k__Bacteria, p__Actinobacteria, c__Actinobacteria, o__Actinomycetales, f__Mycobacteriaceae, g__Mycobacterium, s__	16	0	0	0	0	0	0	0	0	0	0	0	0	0	0	0	0	0	0	0	0	0	12	0	0	0	0	0	0	0	0	0	0	0	0	4	0	0	0	0	0	0	0	0	0	GTGCCAGCAGCCGCGGTAATACGTAGGGTGCGAGCGTTGTCCGGAATTACTGGGCGTAAAGAGCTTGTAGGTGGTTTGTCGCGTTGTTCGTGAAATCTCACGGCTTAACTGTGAGCGTGCGGGCGATACGGGCAGACTAGAGTACTGCAGGGGA
f__Isosphaeraceae, 975760	k__Bacteria, p__Planctomycetes, c__Planctomycetia, o__Gemmatales, f__Isosphaeraceae, g__, s__	54	0	0	0	0	0	53	0	0	0	0	0	1	0	0	0	0	0	0	0	0	0	0	0	0	0	0	0	0	0	0	0	0	0	0	0	0	0	0	0	0	0	0	0	0	GCAGCCGCGGTAAGACGAACCGTGCGAACGTTATTCGGAATCATTGGGCTTAAAGCGCGTGTAGGCGGATGGGAACGTCGGCTTTGAAAGCCCCCGGCTCAACCGGGGAATTGGCGCCGAAACGACCCGTCTCGAGGGGCATAGGGGG
g__Corynebacterium, 974249	k__Bacteria, p__Actinobacteria, c__Actinobacteria, o__Actinomycetales, f__Corynebacteriaceae, g__Corynebacterium, s__	17	0	0	0	0	0	0	0	0	0	0	0	0	0	0	0	0	0	0	0	0	0	0	0	0	0	8	5	0	0	0	0	0	0	0	0	0	0	0	0	2	2	0	0	0	GTGCCAGCAGCCGCGGTAATACGTAGGGTGCGAGCGTTGTCCGGAATTACTGGGCGTAAAGAGCTCGTAGGTGGTTTGTCGCGTCGTTTGTGTAAGCCCGCAGCTTAACTGCGGGACTGCAGGCGATACGGGCATAACTTGAGTGCTGTAG
g__Streptococcus, 968954	k__Bacteria, p__Firmicutes, c__Bacilli, o__Lactobacillales, f__Streptococcaceae, g__Streptococcus, s__	10	0	0	0	0	0	0	0	0	0	0	0	0	0	0	0	0	0	0	0	0	0	0	0	0	0	0	0	0	0	0	0	0	0	0	10	0	0	0	0	0	0	0	0	0	GTGCCAGCAGCCGCGGTAATACGTAGGTCCCGAGCGTTATCCGGATTTATTGGGCGTAAAGCGAGCGCAGGCGGTTAGATAAGTCTGAAGTTAAAGGCTGTGGCTTAACCATAGTACGCTTTGGAAACTGTTTAACTTGAGTGCAGAAGGG
s__parainfluenzae, 968675	k__Bacteria, p__Proteobacteria, c__Gammaproteobacteria, o__Pasteurellales, f__Pasteurellaceae, g__Haemophilus, s__parainfluenzae	230	0	0	0	0	0	0	0	17	0	0	0	0	0	0	0	0	0	0	0	0	0	84	0	0	16	26	25	0	0	0	0	0	0	0	0	61	0	0	1	0	0	0	0	0	GTGCCAGCAGCCGCGGTAATACGGAGGGTGCGAGCGTTAATCGGAATAACTGGGCGTAAAGGGCACGCAGGCGGTGACTTAAGTGAGGTGTGAAAGCCCCGGGCTTAACCTGGGAATTGCATTTCATACTGGGTCGCTAGAGTACTTTAGGG
g__Streptococcus, 967427	k__Bacteria, p__Firmicutes, c__Bacilli, o__Lactobacillales, f__Streptococcaceae, g__Streptococcus, s__	24	0	0	0	0	0	0	0	0	0	0	0	0	0	0	0	0	0	0	0	0	0	0	0	0	0	3	5	0	0	0	0	0	4	0	0	12	0	0	0	0	0	0	0	0	GTGCCAGCAGCCGCGGTAATACGTAGGTCCCGAGCGTTGTCCGGATTTATTGGGCGTAAAGCGAGCGCAGGCGGTTAGATAAGTCTGAAGTTAAAGGCTGTGGCTTAACCATAGTACGCTTTGGAAACTGTTTAACTTGAGTGCAGAAGGG
f__Rhizobiaceae, 963779	k__Bacteria, p__Proteobacteria, c__Alphaproteobacteria, o__Rhizobiales, f__Rhizobiaceae, g__, s__	3	0	0	0	0	0	0	0	0	0	0	0	0	0	0	0	0	0	0	0	0	0	0	0	0	0	0	0	0	0	2	0	0	1	0	0	0	0	0	0	0	0	0	0	0	GTGCCAGCAGCCGCGGTAATACGAAGGGGGCTAGCGTTGTTCGGAATTACTGGGCGTAAAGCGCACGTAGGCGGATATTTAAGTCAGGGGTGAAATCCCAGAGCTCAACTCTGGAACTGCCTTTGATACTGGGTATCTTGAGTATGGAAGA
g__Pedobacter, 962380	k__Bacteria, p__Bacteroidetes, c__Sphingobacteriia, o__Sphingobacteriales, f__Sphingobacteriaceae, g__Pedobacter, s__	17	0	0	0	0	0	0	0	0	0	0	0	0	0	0	0	0	0	0	0	0	0	0	0	0	1	0	1	1	0	0	12	0	0	0	0	0	0	2	0	0	0	0	0	0	GTGCCAGCAGCCGCGGTAATACGGAGGATCCAAGCGTTATCCGGATTTATTGGGTTTAAAGGGTGCGTAGGCGGCCCGTTAAGTCAGGGGTGAAAGACGGTAGCTCAACTATCGCAGTGCCCTTGATACTGACGGGCTTGAATTGACTAGA
g__Pseudomonas, 961783	k__Bacteria, p__Proteobacteria, c__Gammaproteobacteria, o__Pseudomonadales, f__Pseudomonadaceae, g__Pseudomonas, s__	10	0	0	0	0	0	0	0	0	0	0	0	0	0	0	0	0	0	0	0	0	0	0	0	0	0	1	0	0	0	0	4	2	0	0	0	0	1	0	0	0	1	0	0	1	GTGCCAGCAGCCGCGGTAATACAGAGGGTGCAAGCGTTAATCGGAATTACTGGGCGTAAAGCGCGCGTAGGTGGTTCGTTAAGTTGGATGTGAAAGCCCCGGGCTTAACCTGGGAACTGCATTCAAAACTGACGAGCTAGAGTATGGTAGAG
s__debontii, 950620	k__Bacteria, p__Verrucomicrobia, c__Verrucomicrobiae, o__Verrucomicrobiales, f__Verrucomicrobiaceae, g__Prosthecobacter, s__debontii	256	0	0	0	0	0	205	0	0	0	0	1	49	1	0	0	0	0	0	0	0	0	0	0	0	0	0	0	0	0	0	0	0	0	0	0	0	0	0	0	0	0	0	0	0	AGCAGCCGCGGTAATACAGAGGTCTCAAGCGTTGTTCGGAATCACTGGGCGTAAAGGGTGCGTAGGTGGCGTGGTAAGTCAGATGTGAAAGCCCGGGGCTCAACCTCGGAATTGCATCCGATACTGCCGTGCTAGAGTACTGAAGAGGT
g__Corynebacterium, 947112	k__Bacteria, p__Actinobacteria, c__Actinobacteria, o__Actinomycetales, f__Corynebacteriaceae, g__Corynebacterium, s__	113	0	38	73	0	0	0	0	0	0	0	0	0	0	0	0	0	0	0	0	0	0	0	0	0	0	2	0	0	0	0	0	0	0	0	0	0	0	0	0	0	0	0	0	0	AGCAGCCGCGGTAATACGTAGGGTGCGAGCGTTGTCCGGAATTACTGGGCGTAAAGAGCTCGTAGGTGGTTTGTCGCGTCGTCTGTGAAATTCCGGGGCTTAACTCCGGGCGTGCAGGCGATACGGGCATAACTTGAGTACTGTAGGGG
g__Deinococcus, 942536	k__Bacteria, p__[Thermi], c__Deinococci, o__Deinococcales, f__Deinococcaceae, g__Deinococcus, s__	4	0	0	0	0	0	0	0	0	0	4	0	0	0	0	0	0	0	0	0	0	0	0	0	0	0	0	0	0	0	0	0	0	0	0	0	0	0	0	0	0	0	0	0	0	GCAGCCGCGGTAATACGGAGGGTGCAAGCGTTACCCGGAATCACTGGGCGTAAAGGGCGTGTAGGCGGATCGTTAAGTCTGGTTTTAAAGACCGTGGCTCAACCACGGGAGTGGACTGGATACTGGCAATCTTGACCTCTGGAGAGG
f__Comamonadaceae, 940737	k__Bacteria, p__Proteobacteria, c__Betaproteobacteria, o__Burkholderiales, f__Comamonadaceae, g__, s__	5	0	0	0	0	0	0	0	0	0	0	0	0	0	0	0	0	0	0	0	0	0	0	0	0	0	0	5	0	0	0	0	0	0	0	0	0	0	0	0	0	0	0	0	0	GTGCCAGCAGCCGCGGTAATACGTAGGGTGCGAGCGTTAATCGGAATTACTGGGCGTAAAGCGTGCGCAGGCGGTTGTGTAAGACAGATGTGAAATCCCCGGGCTCAACCTGGGAACTGCATTTGTGACTGCACGGCTGGAGTGCGGCAGA
s__guillouiae, 938794	k__Bacteria, p__Proteobacteria, c__Gammaproteobacteria, o__Pseudomonadales, f__Moraxellaceae, g__Acinetobacter, s__guillouiae	12	0	0	0	0	0	0	0	0	0	0	0	0	0	0	0	0	0	0	0	0	0	0	0	0	4	0	0	0	0	0	6	2	0	0	0	0	0	0	0	0	0	0	0	0	GTGCCAGCAGCCGCGGTAATACAGAGGGTGCGAGCGTTAATCGGATTTACTGGGCGTAAAGCGTACGTAGGCGGCTTATTAAGTCGGATGTGAAATCCCTGAGCTTAACTTAGGAATTGCATTCGATACTGGTGAGCTAGAGTATGGGAGA
g__Ramlibacter, 937372	k__Bacteria, p__Proteobacteria, c__Betaproteobacteria, o__Burkholderiales, f__Comamonadaceae, g__Ramlibacter, s__	5	0	0	0	0	0	2	0	0	0	0	0	0	0	0	0	0	3	0	0	0	0	0	0	0	0	0	0	0	0	0	0	0	0	0	0	0	0	0	0	0	0	0	0	0	AGCAGCCGCGGTAATACGTAGGGTGCGAGCGTTAATCGGAATTACTGGGCGTAAAGCGTGCGCAGGCGGTGATGTAAGACAGGTGTGAAATCCCCGGGCTTAACCTGGGAACTGCATTTGTGACTGCATCGCTGGAGTGCGGCAGAGG
g__Acidovorax, 931643	k__Bacteria, p__Proteobacteria, c__Betaproteobacteria, o__Burkholderiales, f__Comamonadaceae, g__Acidovorax, s__	131	0	0	0	0	0	0	0	0	0	0	0	0	0	0	0	0	0	0	0	0	0	0	0	7	0	5	34	0	0	0	0	0	0	0	22	29	14	2	0	18	0	0	0	0	GTGCCAGCAGCCGCGGTAATACGTAGGGTGCAAGCGTTAATCGGAATTACTGGGCGTAAAGCGTGCGCAGGCGGTAATGTAAGACAGATGTGAAATCCCCGGGCTCAACCTGGGAACTGCATTTGTGACTGCATTGCTGGAGTACGGCAGA
s__mucosa, 929312	k__Bacteria, p__Proteobacteria, c__Alphaproteobacteria, o__Rhodospirillales, f__Acetobacteraceae, g__Roseomonas, s__mucosa	7	0	0	0	0	0	0	0	0	0	0	0	0	0	0	0	0	0	0	0	0	0	0	0	0	0	0	7	0	0	0	0	0	0	0	0	0	0	0	0	0	0	0	0	0	GTGCCAGCAGCCCCGGTAATACTAAGGGGGCTAGCGATGCTCGGAATTACTGGGCGTAAAGGGCGCGTAAGCGGCGGCCCAAGTCAGGCGTGAAATTCCTGGGCTCAACCTGGGGACTGCGCTTGATACTGGGTTGCTTGAGGATGGAAGA
s__columnare, 923789	k__Bacteria, p__Bacteroidetes, c__Flavobacteriia, o__Flavobacteriales, f__Flavobacteriaceae, g__Flavobacterium, s__columnare	232	0	0	0	0	0	0	0	0	0	0	0	0	0	0	0	0	0	0	0	0	0	0	0	0	0	0	0	4	0	0	0	0	0	211	0	12	0	0	5	0	0	0	0	0	GTGCCAGCAGCCGCGGTAATACGGAGGATCCAAGCGTTATCCGGAATCATTGGGTTTAAAGGGTCCGTAGGCGGTTTTATAAGTCAGTGGTGAAATCTGGTCGCTCAACGATCAAACGGCCATTGATACTGTAGAACTTGAATTACTTGGA
g__Streptococcus, 923098	k__Bacteria, p__Firmicutes, c__Bacilli, o__Lactobacillales, f__Streptococcaceae, g__Streptococcus, s__	4	0	0	0	0	0	0	0	0	0	0	0	0	0	0	0	0	0	0	0	0	0	0	0	0	0	0	0	0	0	0	0	0	0	0	0	0	4	0	0	0	0	0	0	0	GTGCCAGCAGCCGCGGTAATACGTAGGTCCCGAGCGTTATCCGGATTTATTGGGCGTAAAGCGAGCGCAGGCGGTTAGATAAGTCTGAAGTTAAAGGCTGTGGCTTAACCATAGTACGCTTTGGAAACTGTTTAACTTGAGTGCAAGAGGG
g__Hymenobacter, 922912	k__Bacteria, p__Bacteroidetes, c__Cytophagia, o__Cytophagales, f__Cytophagaceae, g__Hymenobacter, s__	2	0	0	0	0	0	0	0	0	0	0	0	0	0	0	0	0	0	0	0	0	0	0	0	0	0	0	0	0	0	0	0	0	0	0	2	0	0	0	0	0	0	0	0	0	GTGCCAGCAGCCGCGGTAATACGGAGGGTGCGAGCGTTGTCCGGATTTATTGGGTTTAAAGGGTGCGTAGGCGGCCCGTTAAGTCCGGGGTGAAAGCCCACGGCTCAACCGTGGAACTGCCCCGGATACTGGCGGGCTTGAGTTCGGGCGA
g__Luteolibacter, 909170	k__Bacteria, p__Verrucomicrobia, c__Verrucomicrobiae, o__Verrucomicrobiales, f__Verrucomicrobiaceae, g__Luteolibacter, s__	58	0	0	0	0	0	57	0	0	0	0	0	1	0	0	0	0	0	0	0	0	0	0	0	0	0	0	0	0	0	0	0	0	0	0	0	0	0	0	0	0	0	0	0	0	GCAGCCGCGGTAATACGAAGGTCCCGAGCGTTGTTCGGAATCACTGGGCGTAAAGGGAGCGTAGGCGGCGCGGTAAGTCAGATGTGAAATCCCGGGGCTCAACCCCGGAACTGCATCCGATACTGCCGTGCTAGAGGATTGGAGAGGT
g__Corynebacterium, 907241	k__Bacteria, p__Actinobacteria, c__Actinobacteria, o__Actinomycetales, f__Corynebacteriaceae, g__Corynebacterium, s__	5	0	0	0	0	0	0	0	0	0	0	0	0	0	0	0	0	0	0	0	0	0	0	0	0	0	0	0	0	0	0	0	0	0	0	0	5	0	0	0	0	0	0	0	0	GTGCCAGCAGCCGCGGTAATACGTAGGGTGCGAGCGTTGTCCGGAATTACTGGGCGTAAAGAGCTCGTAGGTGGTTTGTCGCGTCGTCTGTGAAATTCCGGGGCTTAACTTCGGGCGTGCAGGCGATACGGGCATAACTAGAGTGCTGTAG
g__Porphyromonas, 905769	k__Bacteria, p__Bacteroidetes, c__Bacteroidia, o__Bacteroidales, f__Porphyromonadaceae, g__Porphyromonas, s__	4	0	0	0	0	0	0	0	0	0	0	0	0	0	0	0	0	0	4	0	0	0	0	0	0	0	0	0	0	0	0	0	0	0	0	0	0	0	0	0	0	0	0	0	0	GCAGCCGCGGTAATACGGAGGATGCGAGCGTTATCCGGATTTATTGGGTTTAAAGGGTGCGTAGGCGGCCTGTTAAGTCAGCGGTGAAATCTAGGAGCTTAACTCCTAAATTGCCGTTGATACTGGCGGGCTTGAGTGTAGATGAGG
g__Mycobacterium, 902334	k__Bacteria, p__Actinobacteria, c__Actinobacteria, o__Actinomycetales, f__Mycobacteriaceae, g__Mycobacterium, s__	2	0	0	0	0	0	2	0	0	0	0	0	0	0	0	0	0	0	0	0	0	0	0	0	0	0	0	0	0	0	0	0	0	0	0	0	0	0	0	0	0	0	0	0	0	GCAGCCGCGGTAATACGTAGGGTGCGAGCGTTGTCCGGAATTACTGGGCGTAAAGAGCTCGTAGGTGGTTTGTCGCGTTGTTCGTGAAAACTCACAGCTTAACTGTGGGCGTGCGGGCGATACGGGCAGACTGGAGTACTGCAGGGG
f__Beijerinckiaceae, 900013	k__Bacteria, p__Proteobacteria, c__Alphaproteobacteria, o__Rhizobiales, f__Beijerinckiaceae, g__, s__	12	0	0	0	0	0	0	0	0	0	0	0	0	0	0	0	0	0	0	0	0	0	0	0	0	0	0	0	0	0	0	0	0	0	0	0	0	0	12	0	0	0	0	0	0	GTGCCAGCAGCCGCGGTAATACGAAGGGGGCTAGCGTTGCTCGGAATCACTGGGCGTAAAGGGCGCGTAGGCGGACGTTTAAGTCAGGGGTGAAATCCCGGGGCTCAACCTCGGAATTGCCTTTGATACTGGATGTCTCGAGACCGGAAGA
g__Pedobacter, 896276	k__Bacteria, p__Bacteroidetes, c__Sphingobacteriia, o__Sphingobacteriales, f__Sphingobacteriaceae, g__Pedobacter, s__	8	0	0	1	0	0	1	0	0	0	0	0	0	0	0	0	0	0	0	0	0	0	0	0	0	0	1	1	1	0	0	0	0	0	0	0	0	0	0	1	0	0	0	0	2	GTGCCAGCAGCCGCGGTAATACGGAGGATCCAAGCGTTATCCGGATTTATTGGGTTTAAAGGGTGCGTAGGCGGCCTGTTAAGTCAGGGGTGAAAGACGGTAGCTCAACTATCGCAGTGCCCTTGATACTGACGGGCTTGAATGAACTAGAG
g__Acinetobacter, 891054	k__Bacteria, p__Proteobacteria, c__Gammaproteobacteria, o__Pseudomonadales, f__Moraxellaceae, g__Acinetobacter, s__	15	0	0	1	1	0	0	0	0	0	0	0	0	0	0	0	0	2	0	0	0	0	0	0	1	0	0	0	1	1	0	3	1	0	1	0	0	0	2	0	0	0	0	0	1	GTGCCAGCACCCGCGGTAATACAGAGGGTGCGAGCGTTACTCGAGATTTACTGGGCGTAAAGCGTGCGTAGGCGGCTTTTTAACTCAGATGTGAAATCCCCGAGCTTAACTTGGGAATTGCATTCGATACTGGGAAGCTAGAGTATGGGAGAG
s__multivorum, 891031	k__Bacteria, p__Bacteroidetes, c__Sphingobacteriia, o__Sphingobacteriales, f__Sphingobacteriaceae, g__Sphingobacterium, s__multivorum	971	69	0	0	0	0	0	0	0	0	0	0	0	0	0	0	1	0	46	0	0	0	0	609	14	0	52	63	13	5	0	10	9	12	0	11	0	0	35	11	9	0	1	0	1	GTGCCAGCAGCCGCGGTAATACGGAGGATCCGAGCGTTATCCGGATTTATTGGGTTTAAAGGGTGCGTAGGCGGCCTATTAAGTCAGGGGTGAAATACGGTGGCTCAACCATCGCAGTGCCTTTGATACTGATGGGCTTGAATCCATTTGAA
g__Acinetobacter, 889025	k__Bacteria, p__Proteobacteria, c__Gammaproteobacteria, o__Pseudomonadales, f__Moraxellaceae, g__Acinetobacter, s__	193	0	0	0	0	0	0	0	0	0	0	0	0	0	0	0	42	0	0	36	35	0	0	0	1	9	11	0	0	6	0	6	5	9	0	7	0	0	7	0	8	11	0	0	0	AGCAGCCGCGGTAATACAGAGGGTGCGAGCGTTAATCGGATTTACTGGGCGTAAAGCGTGCGTAGGCGGCTAATTGAGTCGGATGTGAAATCCCCGAGCTTAACTTGGGAATTGCATTCGATACTGGTTAGCTAGAGTGTGGGAGAGGA
g__Hydrogenophaga, 888396	k__Bacteria, p__Proteobacteria, c__Betaproteobacteria, o__Burkholderiales, f__Comamonadaceae, g__Hydrogenophaga, s__	62	0	0	0	0	0	1	0	0	0	0	0	1	0	0	0	0	0	0	0	0	0	0	0	0	0	0	8	13	0	0	0	0	0	23	0	0	0	6	0	5	5	0	0	0	GTGCCAGCAGCCGCGGTAATACGTAGGGTGCAAGCGTTAATCGGAATTACTGGGCGTAAAGCGTGCGCAGGCGGTGATGTAAGACAGAGGTGAAATCCCCGGGCTCAACCTGGGAACTGCCTTTGTGACTGCATCGCTGGAGTGCGGCAGAG
g__Corynebacterium, 870544	k__Bacteria, p__Actinobacteria, c__Actinobacteria, o__Actinomycetales, f__Corynebacteriaceae, g__Corynebacterium, s__	11	0	0	0	0	0	0	0	0	0	0	0	0	0	0	0	0	0	0	0	0	0	0	0	0	0	0	0	0	0	0	0	0	0	0	0	11	0	0	0	0	0	0	0	0	GTGCCAGCAGCCGCGGTAATACGTAGGGTGCGAGCGTTGTCCGGAATTACTGGGCGTAAAGAGCTCGTAGGTGGTTTGTCGCGTCGTCTGTGAAATTCCGGGGCTTAACTCCGGGCGTGCAGGCGATACGGGCAAACTGGAGTGCTGTAGG
g__Sphingomonas, 868791	k__Bacteria, p__Proteobacteria, c__Alphaproteobacteria, o__Sphingomonadales, f__Sphingomonadaceae, g__Sphingomonas, s__	58	0	0	0	0	0	0	0	0	0	0	0	0	0	0	58	0	0	0	0	0	0	0	0	0	0	0	0	0	0	0	0	0	0	0	0	0	0	0	0	0	0	0	0	0	AGCAGCCGCGGTAATACGGAGGGAGCTAGCGTTGTTCGGAATTACTGGGCGTAAAGCGCACGTAGGCGGCTTTGTAAGTTAGAGGTGAAAGCCTGGAGCTCAACTCCAGAACTGCCTTTGATACTGCATGGCTTGAATCCAGGAGAGGT
f__Bartonellaceae, 868144	k__Bacteria, p__Proteobacteria, c__Alphaproteobacteria, o__Rhizobiales, f__Bartonellaceae, g__, s__	2	0	0	0	0	0	0	0	0	0	0	0	0	0	0	0	0	0	0	0	0	0	0	0	0	0	0	2	0	0	0	0	0	0	0	0	0	0	0	0	0	0	0	0	0	GTGCCAGCAGCCGCGGTAATACGAAGGGGGCTAGCGTTGTTCGGATTTACTGGGCGTAAAGCGCGCGTAGGCGGATAAATTAGTTAGAGGTGAAATCCCAGGGCTCAACCCTGGAACTGCCTTTAATACTGTTTATCTAGAGTATGAAAGA
g__Thermus, 867135	k__Bacteria, p__[Thermi], c__Deinococci, o__Thermales, f__Thermaceae, g__Thermus, s__	59	59	0	0	0	0	0	0	0	0	0	0	0	0	0	0	0	0	0	0	0	0	0	0	0	0	0	0	0	0	0	0	0	0	0	0	0	0	0	0	0	0	0	0	0	AGCAGCCGCGGTAATACGGAGGGCGCGAGCGTTACCCGGATTTACTGGGCGTAAAGGGCGTGTAGGCGGCCTGGGGCGTCCCATGTGAAAGGCCACGGCTCAACCGTGGAGGAGCGTGGGATACGCTCAGGCTAGAGGGTGGGAGAGGG
s__mucilaginosa, 866280	k__Bacteria, p__Actinobacteria, c__Actinobacteria, o__Actinomycetales, f__Micrococcaceae, g__Rothia, s__mucilaginosa	16	0	0	0	0	0	0	0	0	0	0	0	0	0	0	0	0	0	0	0	0	0	0	0	0	0	9	0	0	0	0	0	3	0	0	0	0	0	0	4	0	0	0	0	0	GTGCCAGCAGCCGCGGTAATACGTAGGGCGCGAGCGTTGTCCGGAATTATTGGGCGTAAAGAGCTTGTAGGCGGTTTGTCGCGTCTGCTGTGAAAGGCCGGGGCTTAACCCCGTGTATTGCAGTGGGTACGGGCAGACTAGAGTGCAGTAG
o__Rhizobiales, 863942	k__Bacteria, p__Proteobacteria, c__Alphaproteobacteria, o__Rhizobiales, f__, g__, s__	5	0	0	0	0	0	5	0	0	0	0	0	0	0	0	0	0	0	0	0	0	0	0	0	0	0	0	0	0	0	0	0	0	0	0	0	0	0	0	0	0	0	0	0	0	GCAGCCGCGGTAATACGAAGGGGGCTAGCGTTGCTCGGAATCACTGGGCGTAAAGCGCACGTAGGCGGATCTTTAAGTCAGGGGTGAAATCCCAAGGCTCAACCTTGGAACTGCCTTTGATACTGGGGATCTCGAGTCCGGAAGAGG
g__Corynebacterium, 861807	k__Bacteria, p__Actinobacteria, c__Actinobacteria, o__Actinomycetales, f__Corynebacteriaceae, g__Corynebacterium, s__	834	168	0	132	0	0	0	0	0	88	0	92	2	0	0	0	0	0	0	0	0	1	137	4	1	37	6	25	1	19	5	6	0	0	0	96	0	0	1	0	5	6	0	1	1	AGCAGCCGCGGTAATACGTAGGGTGCGAGCGTTGTCCGGAATTACTGGGCGTAAAGGGCTCGTAGGTGGTTTGTCGCGTCGTCTGTGAAATTCCGGGGCTTAACTCCGGGCGTGCAGGCGATACGGGCATAACTTGAGTACTGTAGGGG
o__Caulobacterales, 850606	k__Bacteria, p__Proteobacteria, c__Alphaproteobacteria, o__Caulobacterales, f__, g__, s__	38	0	0	0	0	0	0	0	0	0	0	0	0	0	0	0	0	0	0	0	0	0	0	23	0	0	8	0	5	0	0	0	1	0	1	0	0	0	0	0	0	0	0	0	0	GTGCCAGCAGCCGCGGTAATACGAAGGGGGCTAGCGTTGTTCGGAATTACTGGGCGTAAAGCGCACGTAGGCGGACATTTAAGTCAGGGGTGAAATCCCGGGGCTCAACCTCGGAACTGCCTTTGATACTGGGTGTCTTGAGTGTGGAAGAG
f__Rhizobiaceae, 850572	k__Bacteria, p__Proteobacteria, c__Alphaproteobacteria, o__Rhizobiales, f__Rhizobiaceae, g__, s__	63	0	0	0	0	0	0	0	0	0	0	0	0	0	0	0	0	0	0	0	0	0	0	17	0	0	0	2	0	0	0	0	0	0	0	0	0	0	0	44	0	0	0	0	0	GTGCCAGCAGCCGCGGTAATACGAAGGGGGCTAGCGTTGTTCGGAATTACTGGGCGTAAAGCGCACGTAGGCGGGTATTTAAGTCAGGGGTGAAATCCCGGAGCTCAACTCCGGAACTGCCTTTGATACTGGGTACCTAGAGTATGGAAGAG
g__Devosia, 849118	k__Bacteria, p__Proteobacteria, c__Alphaproteobacteria, o__Rhizobiales, f__Hyphomicrobiaceae, g__Devosia, s__	124	0	0	0	0	0	0	0	0	0	0	0	13	1	0	0	0	1	2	0	0	0	0	17	0	0	18	0	0	3	2	18	8	12	0	0	0	24	0	4	0	0	0	0	1	GTGCCAGCAGCCGCGGTAATACGAAGGGGGCTAGCGTTGTTCGGATTTACTGGGCGTAAAGCGCACGTAGGCGGATCGTTAAGTCGGGGGTGAAATCCTGGAGCTCAACTCCAGAACTGCCTTCGATACTGGCGATCTTGAGTCCGGAAGAG
f__Sphingobacteriaceae, 848824	k__Bacteria, p__Bacteroidetes, c__Sphingobacteriia, o__Sphingobacteriales, f__Sphingobacteriaceae, g__, s__	242	0	0	0	0	0	0	0	0	0	0	0	0	0	0	0	0	0	0	0	0	0	0	197	0	0	0	3	2	0	0	0	0	0	1	0	0	0	0	38	0	0	0	0	1	GTGCCAGCAGCCGCGGTAATACGGAGGATCCAAGCGTTATCCGGATTTATTGGGTTTAAAGGGTGCGTAGGTGGCCTGTTAAGTCAGGGGTGAAAGACGGTAGCTTAACTATCGCAGTGCCCTTGATACTGATGGGCTTGAATGAACTAGA
f__Comamonadaceae, 846710	k__Bacteria, p__Proteobacteria, c__Betaproteobacteria, o__Burkholderiales, f__Comamonadaceae, g__, s__	15	0	0	0	0	0	12	0	0	0	0	0	0	0	0	0	0	1	0	0	0	0	0	1	0	0	0	0	0	0	0	0	0	0	1	0	0	0	0	0	0	0	0	0	0	AGCAGCCGCGGTAATACGTAGGGTGCAAGCGTTAATCGGAATTACTGGGCGTAAAGCGTGCGCAGGCGGTTTTGTAAGACAGAGGTGAAATCCCCGGGCTCAACCTGGGAACTGCCTTTGTGACTGCAAGGCTGGAGTGCGGCAGAGG
g__Diaphorobacter, 846104	k__Bacteria, p__Proteobacteria, c__Betaproteobacteria, o__Burkholderiales, f__Comamonadaceae, g__Diaphorobacter, s__	300	0	0	0	0	0	294	0	0	0	0	0	3	0	0	0	0	3	0	0	0	0	0	0	0	0	0	0	0	0	0	0	0	0	0	0	0	0	0	0	0	0	0	0	0	AGCAGCCGCGGTAATACGTAGGGTGCAAGCGTTAATCGGAATTACTGGGCGTAAAGCGTGCGCAGGCGGTTATGTAAGACAGAGGTGAAATCCCCGGGCTCAACCTGGGAACTGCCTTTGTGACTGCATAGCTGGAGTACGGCAGAGGG
f__Sphingobacteriaceae, 843920	k__Bacteria, p__Bacteroidetes, c__Sphingobacteriia, o__Sphingobacteriales, f__Sphingobacteriaceae, g__, s__	4	0	0	0	0	0	0	0	0	0	0	0	0	0	0	0	0	0	0	0	0	0	0	0	0	0	0	0	4	0	0	0	0	0	0	0	0	0	0	0	0	0	0	0	0	GTGCCAGCAGCCGCGGTAATACGGAGGATCCAAGCGTTATCCGGATTTATTGGGTTTAAAGGGTGCGTAGGCGGCCTATTAAGTCAGGGGTGAAAGACGGTAGCTTAACTATCGCAGTGCCTTTGATACTGATGGGCTTGAATGTACTTGA
g__Mycoplana, 841170	k__Bacteria, p__Proteobacteria, c__Alphaproteobacteria, o__Caulobacterales, f__Caulobacteraceae, g__Mycoplana, s__	3	0	0	0	0	0	0	0	0	0	0	0	0	0	0	0	0	0	0	0	0	0	0	0	0	0	0	0	0	0	0	0	0	0	3	0	0	0	0	0	0	0	0	0	0	GTGCCAGCAGCCGCGGTAATACGAAGGGGGCTAGCGTTGCTCGGAATTACTGGGCGTAAAGGGAGCGTAGGCGGACATTTAAGTCAGGGGTGAAATCCCGAGGCTCAACCTCGGAACTGCCTTTGATACTGGGTGTCTTGAGTGTGAGAGA
f__Aeromonadaceae, 839235	k__Bacteria, p__Proteobacteria, c__Gammaproteobacteria, o__Aeromonadales, f__Aeromonadaceae, g__, s__	10645	0	0	0	0	19	40	0	9	92	56	6	6	259	48	21	1	1015	51	34	66	1	0	1021	241	467	455	582	1192	350	88	749	649	187	1685	186	63	305	256	181	54	32	26	32	120	CGTGCCAGCAGCCGCGGTAATACGGAGGGTGCAAGCGTTAATCGGAATTACTGGGCGTAAAGCGCACGCAGGCGGTTGGATAAGTTAGATGTGAAAGCCCCGGGCTCAACCTGGGAATTGCATTTAAAACTGTCCAGCTAGAGTCTTGTAGAG
g__Hydrogenophaga, 838837	k__Bacteria, p__Proteobacteria, c__Betaproteobacteria, o__Burkholderiales, f__Comamonadaceae, g__Hydrogenophaga, s__	25	0	0	0	0	0	18	0	0	0	0	0	2	0	0	0	0	0	0	0	0	0	0	0	0	0	0	0	1	0	0	0	0	0	4	0	0	0	0	0	0	0	0	0	0	AGCAGCCGCGGTAATACGTAGGGTGCGAGCGTTAATCGGAATTACTGGGCGTAAAGCGTGCGCAGGCGGTTTTGTAAGACAGAGGTGAAATCCCCGGGCTCAACCTGGGAACTGCCTTTGTGACTGCAAAGCTGGAGTGCGGCAGAGG
f__Aeromonadaceae, 838558	k__Bacteria, p__Proteobacteria, c__Gammaproteobacteria, o__Aeromonadales, f__Aeromonadaceae, g__, s__	40	0	0	0	0	0	0	0	0	0	0	0	0	0	0	0	0	0	0	0	0	0	0	6	0	1	1	2	9	0	2	4	3	1	7	1	0	0	3	0	0	0	0	0	0	TGTGCCAGCAGCCGCGGTAATACGGAGGGTGCAAGCGTTAATCGGAATTACTGGGCGTAAAGCGCACGCAGGCGGTTGGATAAGTTAGATGTGAAAGCCCCGGGCTCAACCTGGGAATTGCATTTAAAACTGTCCAGCTAGAGTCTTGTAGAG
f__Hyphomonadaceae, 837424	k__Bacteria, p__Proteobacteria, c__Alphaproteobacteria, o__Rhodobacterales, f__Hyphomonadaceae, g__, s__	7	0	0	0	0	0	7	0	0	0	0	0	0	0	0	0	0	0	0	0	0	0	0	0	0	0	0	0	0	0	0	0	0	0	0	0	0	0	0	0	0	0	0	0	0	GCAGCCGCGGTAATACGAAGGGGGCTAGCGTTGGTCGGAATTACTGGGCGTAAAGCGCACGTAGGCGGGTTTGTAAGTAGGGGGTGAAATCCCAGGGCTCAACCCTGGAACTGCCTTCTAGACTGCAAGCCTGGAGGTCAGGAGAGG
f__Aeromonadaceae, 837283	k__Bacteria, p__Proteobacteria, c__Gammaproteobacteria, o__Aeromonadales, f__Aeromonadaceae, g__, s__	6996	0	0	1	30	0	150	267	0	0	1	0	1	0	25	0	0	115	21	54	0	0	55	2852	3	0	9	0	2192	4	4	4	4	1	736	1	0	6	0	309	13	27	56	29	26	CGTGCCAGCAGCCGCGGTAATACGGAGGGTGCAAGCGTTAATCGGAATTACTGGGCGTAAAGCGCACGCAGGCGGTTTGTTAAGTCAGATGTGAAATCCCCGAGCTCAACTTGGGAACTGCATTTGAAACTGGCAAGCTAGAGTCTTGTAGAG
g__Shewanella, 836783	k__Bacteria, p__Proteobacteria, c__Gammaproteobacteria, o__Alteromonadales, f__Shewanellaceae, g__Shewanella, s__	2075	0	0	0	0	0	18	22	0	0	26	0	1	0	0	0	6	34	0	0	52	0	0	36	86	100	233	93	66	164	26	261	274	125	155	113	8	58	65	4	2	0	2	1	44	GTGCCAGCAGCCGCGGTAATACGGAGGGTCCGAGCGTTAATCGGAATTACTGGGCGTAAAGCGTGCGCAGGCGGTTTGTTAAGCGAGATGTGAAAGCCCTGGGCTCAACCTAGGAATAGCATTTCGAACTGGCGAACTAGAGTCTTGTAGAG
c__CK-1C4-19, 836766	k__Bacteria, p__Tenericutes, c__CK-1C4-19, o__, f__, g__, s__	31	0	0	0	0	0	0	0	0	0	0	0	0	0	0	0	0	0	0	0	0	0	0	0	0	0	0	0	0	0	0	0	0	0	0	0	0	0	0	31	0	0	0	0	0	GTGCCAGCAGCCGCGGTAATACGTAGGTGGCGAGCGTTATCCGGAATTATTGGGCGTAAAGGGCGTGTAGGCGGTGTTTTAAGTCTGATGTGAAAGCCAACGGCTCAACCGTTGAAATGCATTGGAAACTGGAACACTTGAGTGTCGGAGA
f__Comamonadaceae, 835591	k__Bacteria, p__Proteobacteria, c__Betaproteobacteria, o__Burkholderiales, f__Comamonadaceae, g__, s__	6	0	0	0	0	0	6	0	0	0	0	0	0	0	0	0	0	0	0	0	0	0	0	0	0	0	0	0	0	0	0	0	0	0	0	0	0	0	0	0	0	0	0	0	0	AGCAGCCGCGGTAATACGTAGGGTGCAAGCGTTAATCGGAATTACTGGGCGTAAAGCGTGCGCAGGCGGTTTTGTAAGACAGAGGTGAAATCCCCGGGCTCAACCTGGGAACTGCCTTTGTGACTGCAAAGCTGGAGTACGGCAGAGGG
f__Aeromonadaceae, 834097	k__Bacteria, p__Proteobacteria, c__Gammaproteobacteria, o__Aeromonadales, f__Aeromonadaceae, g__, s__	3	0	0	0	0	0	0	0	0	0	0	0	0	0	0	0	0	0	0	0	0	0	0	0	0	0	0	0	0	0	0	0	1	0	2	0	0	0	0	0	0	0	0	0	0	GTGCCAGCAGCCGCGGTAATACGGAGGGTGCAAGCGTTAATCGGAATTACTGGGCGTAAAGCGCACGCAGGCGGTTGGATAAGTTAGATGTGAAAGCCCCGGGGCTCAACCTGGGAATTGCATTTAAAACTGTCCAGCTAGAGTCTTGTAGA
f__Comamonadaceae, 833853	k__Bacteria, p__Proteobacteria, c__Betaproteobacteria, o__Burkholderiales, f__Comamonadaceae, g__, s__	536	0	0	0	0	0	6	0	0	0	0	0	0	0	0	0	0	33	1	0	0	1	0	4	0	0	16	4	98	1	1	7	0	0	334	4	0	2	0	19	1	1	1	0	2	GTGCCAGCAGCCGCGGTAATACGTAGGGTGCAAGCGTTAATCGGAATTACTGGGCGTAAAGCGTGCGCAGGCGGTTATATAAGACAGATGTGAAATCCCCGGGCTCAACCTGGGAACTGCATTTGTGACTGTATAGCTAGAGTACGGCAGAG
s__lividum, 832674	k__Bacteria, p__Proteobacteria, c__Betaproteobacteria, o__Burkholderiales, f__Oxalobacteraceae, g__Janthinobacterium, s__lividum	13	0	0	0	0	0	0	0	0	0	0	0	0	0	0	0	0	0	0	0	0	0	0	0	0	0	0	0	0	0	0	0	0	0	0	13	0	0	0	0	0	0	0	0	0	GTGCCAGCAGCCGCGGTAATACGTAGGGTGCAAGCGTTAATCGGAATTACTGGGCGTAAAGCGTGCGCAGGCGGTTTTGTAAGTCTGATGTGAAATCCCCGGGCTCAACCTGGGAATTGCATTGGAGACTGCAAGGCTAGAATCTGGCAGA
f__Sphingomonadaceae, 832113	k__Bacteria, p__Proteobacteria, c__Alphaproteobacteria, o__Sphingomonadales, f__Sphingomonadaceae, g__, s__	34	0	0	0	0	0	34	0	0	0	0	0	0	0	0	0	0	0	0	0	0	0	0	0	0	0	0	0	0	0	0	0	0	0	0	0	0	0	0	0	0	0	0	0	0	GCAGCCGCGGTAATACGGAGGGAGCTAGCGTTGTTCGGAATTACTGGGCGTAAAGCGTGCGTAGGCGGTGACTCAAGTCAGAGGTGAAAGCCTGGAGCTCAACTCCAGAACTGCCTTTGAAACTAGGTCGCTAGAATGTCGGAGAGGT
f__Aeromonadaceae, 831599	k__Bacteria, p__Proteobacteria, c__Gammaproteobacteria, o__Aeromonadales, f__Aeromonadaceae, g__, s__	4	0	0	0	0	0	0	0	0	0	0	0	0	0	0	0	0	0	0	0	0	0	0	1	0	0	0	0	0	0	0	0	1	0	1	0	0	0	0	1	0	0	0	0	0	GTGCCAGCAGCCGCAGTAATACGGAGGGTGCAAGCGTTAATCGGAATTACTGGGCGTAAAGCGCACGCAGGCGGTTGGATAAGTTAGATGTGAAAGCCCCGGGCTCAACCTGGGAATTGCATTTAAAACTGTCCAGCTAGAGTCTTGTAGAGGGGGGTAGA
f__Comamonadaceae, 831179	k__Bacteria, p__Proteobacteria, c__Betaproteobacteria, o__Burkholderiales, f__Comamonadaceae, g__, s__	234	0	0	0	0	0	230	0	0	0	0	0	4	0	0	0	0	0	0	0	0	0	0	0	0	0	0	0	0	0	0	0	0	0	0	0	0	0	0	0	0	0	0	0	0	AGCAGCCGCGGTAATACGTAGGGTGCAAGCGTTAATCGGAATTACTGGGCGTAAAGCGTGCGCAGGCGGTCTTGCAAGACAGGTGTGAAATCCCCGGGCTTAACCTGGGAACTGCACTTGTGACTGCAAGGCTGGAGTACGGCAGAGGG
g__Pseudomonas, 829851	k__Bacteria, p__Proteobacteria, c__Gammaproteobacteria, o__Pseudomonadales, f__Pseudomonadaceae, g__Pseudomonas, s__	2422	0	0	0	0	0	0	66	0	29	0	79	0	25	0	13	39	0	109	0	15	10	8	99	137	149	211	115	9	155	25	347	270	58	56	94	33	112	75	1	6	17	2	4	54	TGTGCCAGCAGCCGCGGTAATACAGAGGGTGCAAGCGTTAATCGGAATTACTGGGCGTAAAGCGCGCGTAGGTGGTTTGTTAAGTTGGATGTGAAAGCCCCGGGCTCAACCTGGGAACTGCATCCAAAACTGGCAAGCTAGAGTACGGTAGAG
o__Rhizobiales, 828431	k__Bacteria, p__Proteobacteria, c__Alphaproteobacteria, o__Rhizobiales, f__, g__, s__	10	0	0	0	0	0	0	0	0	0	0	0	0	0	0	0	0	10	0	0	0	0	0	0	0	0	0	0	0	0	0	0	0	0	0	0	0	0	0	0	0	0	0	0	0	GCAGCCGCGGTAATACGAAGGGGGCTAGCGTTGTTCGGATTTACTGGGCGTAAAGCGCACGTAGGCGGCTCGTTAAGTCAGAGGTGAAAGCCTGGAGCTCAACTCCAGAACTGCCTTTGATACTGGCGAGCTCGAGTATGGAAGAGG
s__somerae, 828162	k__Bacteria, p__Fusobacteria, c__Fusobacteriia, o__Fusobacteriales, f__Fusobacteriaceae, g__Cetobacterium, s__somerae	29499	0	180	0	0	1	14	0	0	0	0	1	5	0	0	69	0	326	258	44	0	23	131	16246	14	11	40	1	8061	66	5	63	33	5	3663	12	0	5	1	192	0	1	11	1	16	CGTGCCAGCAGCCGCGGTAATACGTATGTCGCAAGCGTTATCCGGATTTATTGGGCGTAAAGCGCGTCTAGGCGGAAAAATAAGTCTGATGTTAAAATGCGGGGCTCAACTCCGTATTGCGTTGGAAACTGTTTTTCTAGAGTACTGGAGAGG
s__shigelloides, 827919	k__Bacteria, p__Proteobacteria, c__Gammaproteobacteria, o__Enterobacteriales, f__Enterobacteriaceae, g__Plesiomonas, s__shigelloides	2	0	0	0	0	0	0	0	0	0	0	0	0	0	0	0	0	0	0	0	0	0	0	0	0	0	0	0	0	1	0	0	0	0	0	0	0	0	0	0	0	1	0	0	0	GTGCCAGCAGCCGCGGTAATACGGAGGGTGCAAGCGTTAATCGGAATTACTGGGCGTAAAGCGCACGCAGGCGGTTTGTTAAGTCAGATGTGAAATCCCCGAGCTCAACTTGGGAACTGCATTTGAAACTGTCCAGCTAGAGTCTTGTAGAG
o__Rhizobiales, 826904	k__Bacteria, p__Proteobacteria, c__Alphaproteobacteria, o__Rhizobiales, f__, g__, s__	43	0	0	0	0	0	0	0	0	0	0	0	0	0	0	0	0	40	0	1	1	1	0	0	0	0	0	0	0	0	0	0	0	0	0	0	0	0	0	0	0	0	0	0	0	GCAGCTGCGGTAATACGAAGGGGGCTAGCGTTGTTCGGAATTACTGGGCGTAAAGCGCACGTAGGCGGGTCGTTAAGTCAGGGGTGAAATCCCGGAGCTCAACTCCGGAACTGCCTTTGATACTGGCGATCTCGAGATCGGAAGAGG
s__somerae, 825815	k__Bacteria, p__Fusobacteria, c__Fusobacteriia, o__Fusobacteriales, f__Fusobacteriaceae, g__Cetobacterium, s__somerae	5	0	0	0	0	0	0	0	0	0	0	0	0	0	0	0	0	0	0	0	0	0	0	3	0	0	0	0	2	0	0	0	0	0	0	0	0	0	0	0	0	0	0	0	0	GTGCCAGCAGCCGCGGTAATACGTATGTCGCAAGCGTTATCCGGATTTATTGGGCGTAAAGCGCGTCTAGGCGGAAAAATAAGTCTGATGTTGAAATGCGGGGCTCAACTCCGTATTGCGTTGGAAACTGTTTTTCTAGAGTACTGGAGAGGT
g__Ochrobactrum, 823809	k__Bacteria, p__Proteobacteria, c__Alphaproteobacteria, o__Rhizobiales, f__Brucellaceae, g__Ochrobactrum, s__	1627	0	75	168	150	51	0	67	0	76	44	17	0	98	3	6	0	0	0	88	89	188	240	2	107	9	26	48	0	4	4	2	6	13	2	1	1	15	17	1	3	1	5	0	0	AGCAGCCGCGGTAATACGAAGGGGGCTAGCGTTGTTCGGATTTACTGGGCGTAAAGCGCACGTAGGCGGACTTTTAAGTCAGGGGTGAAATCCCGGGGCTCAACCCCGGAACTGCCTTTGATACTGGAAGTCTTGAGTATGGTAGAGGT
g__Limnohabitans, 823696	k__Bacteria, p__Proteobacteria, c__Betaproteobacteria, o__Burkholderiales, f__Comamonadaceae, g__Limnohabitans, s__	22	0	0	0	0	0	0	0	0	0	0	0	0	0	0	0	0	1	2	0	0	0	2	4	0	1	0	0	2	1	0	1	2	0	2	0	0	0	0	3	1	0	0	0	0	GTGCCAGCAGCCGCGGTAATACGTAGGGTGCGAGCGTTAATCGGAATTACTGGGCGTAAAGCGTGCGCAGGCGGTTATATAAGACAGATGTGAAATCCCCGGGCTCAACCTGGGAACTGCATTTGTGACTGTATAGCTAGAGTGCGGCAGAG
f__Oxalobacteraceae, 822419	k__Bacteria, p__Proteobacteria, c__Betaproteobacteria, o__Burkholderiales, f__Oxalobacteraceae, g__, s__	1896	0	0	0	0	0	0	0	0	0	0	0	0	0	0	0	0	0	0	0	0	0	0	0	0	0	1	0	651	0	3	1	1	5	1215	0	0	0	14	2	3	0	0	0	0	CGTGCCAGCAGCCGCGGTAATACGTAGGGTGCAAGCGTTAATCGGAATTACTGGGCGTAAAGCGTGCGCAGGCGGTTTTGTAAGTCTGTCGTGAAATCCCCGGGCTCAACCTGGGAATTGCGATGGAGACTGCAAGGCTAGAATCTGGCAGAG
s__debontii, 819786	k__Bacteria, p__Verrucomicrobia, c__Verrucomicrobiae, o__Verrucomicrobiales, f__Verrucomicrobiaceae, g__Prosthecobacter, s__debontii	184	0	0	0	0	0	177	0	0	0	0	0	4	1	0	0	1	1	0	0	0	0	0	0	0	0	0	0	0	0	0	0	0	0	0	0	0	0	0	0	0	0	0	0	0	GCAGCCGCGGTAATACAGAGGTCTCAAGCGTTGTTCGGAATCACTGGGCGTAAAGGGTGCGTAGGTGGCGTGGTAAGTCAGATGTGAAAGCCCGGGGCTCAACCTCGGAACTGCATCCGATACTGCTGTGCTAGAGTACTGGAGAGGT
s__paradoxus, 819037	k__Bacteria, p__Proteobacteria, c__Betaproteobacteria, o__Burkholderiales, f__Comamonadaceae, g__Variovorax, s__paradoxus	4	0	0	0	0	0	2	0	0	0	0	0	0	0	0	0	0	2	0	0	0	0	0	0	0	0	0	0	0	0	0	0	0	0	0	0	0	0	0	0	0	0	0	0	0	GCAGCCGCGGTAATACGTAGGGTGCGAGCGTTAATCGGAATTACTGGGCGTAAAGCGTGCGCAGGCGGTTATGTAAGACAGTTGTGAAATCCCCGGGCTCAACCTGGGAACTGCATCTGTGACTGCATAGCTAGAGTACGGTAGAGG
g__Pseudomonas, 818602	k__Bacteria, p__Proteobacteria, c__Gammaproteobacteria, o__Pseudomonadales, f__Pseudomonadaceae, g__Pseudomonas, s__	30	0	0	0	0	0	0	0	0	0	0	0	0	0	0	0	0	0	0	0	0	0	0	2	1	4	2	2	1	5	0	4	3	2	0	1	1	0	1	1	0	0	0	0	0	TGTGCCAGCAGCCGCGGTAATACAGAGGGTGCAAGCGTTAATCGGAATTACTGGGCGTAAAGCGCGCGTAGGTGGTTCGTTAAGTTGGATGTGAAAGCCCCGGGCTCAACCTGGGAACTGCATCCAAAACTGGCGAGCTAGAGTTACGGTAGAGG
g__Pseudomonas, 817734	k__Bacteria, p__Proteobacteria, c__Gammaproteobacteria, o__Pseudomonadales, f__Pseudomonadaceae, g__Pseudomonas, s__	2	0	1	0	0	0	0	0	0	0	0	0	0	0	0	0	1	0	0	0	0	0	0	0	0	0	0	0	0	0	0	0	0	0	0	0	0	0	0	0	0	0	0	0	0	GCAGCCGCGGTAATACAGAGGGTGCAAGCGTTAATCGGAATTACTGGGCGTAAAGCGCGCGTAGGTGGTTTGTTAAGTTGAATGTGAAAGCCCCGGGCTCAACCTGGGAACTGCATCCAAAACTGGCAAGCTAGAGTACGGTAGAGG
f__Bacillaceae, 816470	k__Bacteria, p__Firmicutes, c__Bacilli, o__Bacillales, f__Bacillaceae, g__, s__	16	0	0	0	0	0	0	0	0	0	0	0	0	0	0	0	0	0	0	0	0	0	0	0	0	0	0	0	0	6	0	0	0	0	10	0	0	0	0	0	0	0	0	0	0	GTGCCAGCAGCCGCGGTAATACGTAGGTGGCAAGCGTTATCCGGAATTATTGGGCGTAAAGCGCGCGCAGGTGGTTTCTTAAGTCTGATGTGAAAGCCCACGGCTCAACCGTGGAGGGTCATTGGAAACTGGGAGACTTGAGTGCAGAAGA
g__Stenotrophomonas, 815480	k__Bacteria, p__Proteobacteria, c__Gammaproteobacteria, o__Xanthomonadales, f__Xanthomonadaceae, g__Stenotrophomonas, s__	4792	0	0	0	0	0	0	0	0	0	0	0	0	0	0	0	0	0	0	0	0	0	0	1255	14	8	739	575	58	1	0	0	0	0	145	0	0	1	2	1833	86	14	15	34	12	CGTGCCAGCAGCCGCGGTAATACGAAGGGTGCAAGCGTTACTCGGAATTACTGGGCGTAAAGCGTGCGTAGGTGGTTATTTAAGTCCGTTGTGAAAGCCCTGGGCTCAACCTGGGAACTGCAGTGGATACTGGATGACTAGAATGTGGTAGAG
g__Microbacterium, 814239	k__Bacteria, p__Actinobacteria, c__Actinobacteria, o__Actinomycetales, f__Microbacteriaceae, g__Microbacterium, s__	27	0	0	0	0	0	19	0	0	0	0	0	0	0	0	0	0	3	0	0	0	0	0	1	0	0	0	0	3	0	0	0	0	0	1	0	0	0	0	0	0	0	0	0	0	AGCAGCCGCGGTAATACGTAGGGTGCAAGCGTTATCCGGAATTATTGGGCGTAAAGAGCTCGTAGGCGGTTTGTCGCGTCTGCTGTGAAAACCCGAGGCTCAACCTCGGGCCTGCAGTGGGTACGGGCAGACTAGAGTGCGGTAGGGG
f__Pseudomonadaceae, 813945	k__Bacteria, p__Proteobacteria, c__Gammaproteobacteria, o__Pseudomonadales, f__Pseudomonadaceae, g__, s__	38	0	0	0	0	0	0	0	0	0	0	0	0	0	0	0	0	0	0	0	0	0	0	0	0	1	1	0	0	16	0	3	8	0	0	0	0	0	0	0	7	0	0	0	2	GTGCCAGCAGCCGCGGTAATACGAAGGGTGCAAGCGTTAATCGGAATTACTGGGCGTAAAGCGCGCGTAGGTGGTTCGTTAAGTTGGATGTGAAAGCCCCGGGCTCAACCTGGGAACTGCATCCAAAACTGGCGAGCTAGAGTATGGCAGAG
f__Sphingomonadaceae, 813418	k__Bacteria, p__Proteobacteria, c__Alphaproteobacteria, o__Sphingomonadales, f__Sphingomonadaceae, g__, s__	6	0	0	0	0	0	0	0	0	0	0	0	0	0	0	0	0	0	0	0	0	0	0	6	0	0	0	0	0	0	0	0	0	0	0	0	0	0	0	0	0	0	0	0	0	GTGCCAGCAGCCGCGGTAATACGGAGGGAGCTAGCGTTGTTCGGAATTACTGGGCGTAAAGCGCGCGTAGGCGGCTATTCAAGTCAGAGGTGAAAGCCCGGGGCTCAACCCCGGAACTGCCTTTGAAACTAGATAGCTAGAATCTTGGAGA
s__marcusii, 812921	k__Bacteria, p__Proteobacteria, c__Alphaproteobacteria, o__Rhodobacterales, f__Rhodobacteraceae, g__Paracoccus, s__marcusii	37	0	0	0	0	0	0	0	0	0	0	0	0	0	0	0	0	0	0	0	0	0	0	9	0	0	0	0	11	0	0	0	0	0	9	0	0	0	0	8	0	0	0	0	0	GTGCCAGCAGCCGCGGTAATACGGAGGGGGCTAGCGTTGTTCGGAATTACTGGGCGTAAAGCGCACGTAGGCGGACTGGAAAGTCAGAGGTGAAATCCCAGGGCTCAACCTTGGAACTGCCTTTGAAACTATCAGTCTGGAGTTCGAGAGAG
f__Caulobacteraceae, 811449	k__Bacteria, p__Proteobacteria, c__Alphaproteobacteria, o__Caulobacterales, f__Caulobacteraceae, g__, s__	73	0	0	0	0	0	0	0	0	0	0	0	0	0	0	0	0	48	0	0	0	0	0	0	0	0	0	0	16	0	0	0	0	0	9	0	0	0	0	0	0	0	0	0	0	AGCAGCCGCGGTAATACGAAGGGGGCTAGCGTTGCTCGGAATTACTGGGCGTAAAGGGAGCGTAGGCGGATAGTTTAGTCAGAGGTGAAAGCCCAGGGCTCAACCTTGGAATTGCCTTTGATACTGGCTATCTTGAGTATGGGAGAGGT
c__SJA-4, 811148	k__Bacteria, p__TM6, c__SJA-4, o__, f__, g__, s__	33	0	0	0	33	0	0	0	0	0	0	0	0	0	0	0	0	0	0	0	0	0	0	0	0	0	0	0	0	0	0	0	0	0	0	0	0	0	0	0	0	0	0	0	0	AGCAGCCGCGGTAATACGAAGGGTGCAAACGTTATTCGGAATCACTGGGCGTAAAGGGTGCGTAGACGGTATGTTAAGTTCGTTGTTAAAGGCTCCGGCCTAACTGGAGTATTGCGATGAAAACTGGCGTGCTAGAGGGTGAGAGAGA
f__Sphingomonadaceae, 808758	k__Bacteria, p__Proteobacteria, c__Alphaproteobacteria, o__Sphingomonadales, f__Sphingomonadaceae, g__, s__	7	0	0	0	0	0	0	0	0	0	0	0	0	0	0	0	0	0	0	0	0	0	0	0	0	0	0	0	3	0	0	0	3	0	0	0	0	0	0	0	1	0	0	0	0	GTGCCAGCAGCCGCGGTAATACGGAGGGAGCTAGCGTTGTTCGGAATTACTGGGCGTAAAGCGCGCGTAGGCGGTTACTCAAGTCAGAGGTGAAAGCCCGGGGCTCAACCCCGGAACTGCCTTTGAAACTAGGTGACTAGAATCTTGGAGA
f__Comamonadaceae, 808372	k__Bacteria, p__Proteobacteria, c__Betaproteobacteria, o__Burkholderiales, f__Comamonadaceae, g__, s__	64	0	0	0	0	0	0	0	0	0	0	0	0	0	0	0	0	0	0	0	0	0	0	0	0	7	0	0	0	0	0	0	0	0	0	16	14	11	16	0	0	0	0	0	0	GTGCCAGCAGCCGCGGTAATACGTAGGGTGCAAGCGTTAATCGGAATTACTGGGCGTAAAGCGTGCGCAGGCGGTTTTGTAAGTCTGTCGTGAAAGCCCCGGGCTCAACCTGGGAATTGCGATGGAGACTGCAAGGCTTGAATCTGGCAGA
g__Lactobacillus, 807795	k__Bacteria, p__Firmicutes, c__Bacilli, o__Lactobacillales, f__Lactobacillaceae, g__Lactobacillus, s__	4	0	0	0	0	0	0	0	0	0	0	0	0	0	0	0	0	0	0	0	0	0	0	0	0	0	0	0	0	0	0	0	0	0	4	0	0	0	0	0	0	0	0	0	0	GTGCCAGCAGCCGCGGTAATACGTAGGTGGCAAGCGTTGTCCGGATTTATTGGGCGTAAAGCGAGCGCAGGCGGAAAAATAAGTCTAATGTGAAAGCCCTCGGCTTAACCGAGGAACTGCATCGGAAACTGTTTTTCTTGAGTGCAGAAGA
f__[Cerasicoccaceae], 805051	k__Bacteria, p__Verrucomicrobia, c__Opitutae, o__[Cerasicoccales], f__[Cerasicoccaceae], g__, s__	7233	0	0	0	0	0	12	50	38	218	165	0	1	92	381	319	123	682	68	0	47	0	46	400	50	420	436	385	323	385	31	667	536	187	351	104	25	194	159	169	63	4	4	2	96	TGTGCCAGCAGCCGCGGTAATACAGAGACTGCAAGCGTTACTCGGAATCACTGGGCGTAAAGGGAGCGCAGGCGGACCGATTTGTCGGGTGTGAAACCCCGGGGCTCAACCCCGGGACTGCGCCCGAAACTGTCGGTCTAGGGACTCGGAGGG
g__Brevibacterium, 804735	k__Bacteria, p__Actinobacteria, c__Actinobacteria, o__Actinomycetales, f__Brevibacteriaceae, g__Brevibacterium, s__	19	0	0	0	0	0	0	0	0	0	0	0	0	0	0	0	0	0	0	0	0	0	0	0	0	0	0	8	0	0	0	0	0	0	0	0	0	11	0	0	0	0	0	0	0	GTGCCAGCAGCCGCGGTAATACGTAGGGTACGAGCGTTGTCCGGAATTATTGGGCGTAAAGAGCTCGTAGGTGGTTGGTCACGTCTGCTGTGGAAACGCAACGCTTAACGTTGCGCGTGCAGTGGGTACGGGCTGACTAGAGTGCAGTAGG
f__Aeromonadaceae, 804686	k__Bacteria, p__Proteobacteria, c__Gammaproteobacteria, o__Aeromonadales, f__Aeromonadaceae, g__, s__	3	0	0	0	0	0	0	0	0	0	0	0	0	3	0	0	0	0	0	0	0	0	0	0	0	0	0	0	0	0	0	0	0	0	0	0	0	0	0	0	0	0	0	0	0	GCAGCCGCGGTAATACGGAGGGCGCAAGCGTTAATCGGAATTACTGGGCGTAAAGCGCACGCAGGCGGTTGGATAAGTTAGATGTGAAAGCCCCGGGCTCAACCTGGGAATTGCATTTAAAACTGTCCAGCTAGAGTCTTGTAGAGGG
f__Methylophilaceae, 802011	k__Bacteria, p__Proteobacteria, c__Betaproteobacteria, o__Methylophilales, f__Methylophilaceae, g__, s__	2133	0	0	0	0	0	0	0	0	0	24	0	11	0	0	1	0	0	0	0	0	0	0	40	49	60	133	46	66	139	11	236	145	45	921	33	3	63	52	1	27	0	0	0	27	GTGCCAGCAGCCGCGGTAATACGTAGGGTGCGAGCGTTAATCGGAATTACTGGGCGTAAAGCGTGCGCAGGCGGTTTTGTAAGTCAGATGTGAAATCCCCGAGCTCAACTTGGGAACTGCGTTTGAAACTACAAGACTAGAATATGTCAGAG
f__Comamonadaceae, 798634	k__Bacteria, p__Proteobacteria, c__Betaproteobacteria, o__Burkholderiales, f__Comamonadaceae, g__, s__	2	0	0	0	0	0	2	0	0	0	0	0	0	0	0	0	0	0	0	0	0	0	0	0	0	0	0	0	0	0	0	0	0	0	0	0	0	0	0	0	0	0	0	0	0	GCAGCCGCGGTAATACGTAGGGTGCAAGCGTTAATCGGAATTACTGGGCGTAAAGCGTGCGCAGGCGGTTATGCAAGACAGATGTGAAATCCCCGGGCTCAACCTGGGAACTGCATTTGTGACTGCATAGCTAGAGTACGGTAGAGG
f__Enterobacteriaceae, 797229	k__Bacteria, p__Proteobacteria, c__Gammaproteobacteria, o__Enterobacteriales, f__Enterobacteriaceae, g__, s__	16	0	1	2	0	0	0	0	1	2	0	0	0	2	0	0	2	0	2	1	2	1	0	0	0	0	0	0	0	0	0	0	0	0	0	0	0	0	0	0	0	0	0	0	0	GCAGCCGCGGTAATACGGAGGGTGCAAGCGTTAATCGGAATTACTGGGCGTAAAGCGCACGCAGGCGGTTTGTTAAGTCAGATGTGAAATCCCCGGGCTCAACCTGGGAACTGCATCTGATACTGGCAGGCTTGAGTCTCGTAGAGG
g__Agrobacterium, 792073	k__Bacteria, p__Proteobacteria, c__Alphaproteobacteria, o__Rhizobiales, f__Rhizobiaceae, g__Agrobacterium, s__	644	0	0	0	0	0	0	0	0	0	0	0	0	0	0	0	0	0	0	0	0	0	0	61	0	0	0	11	5	0	0	0	2	0	1	0	0	1	0	548	0	6	0	9	0	GTGCCAGCAGCCGCGGTAATACGAAGGGGGCTAGCGTTGTTCGGAATTACTGGGCGTAAAGCGCACGTAGGCGGATATTTAAGTCAGGGGTGAAATCCCGCAGCTCAACTGCGGAACTGCCTTTGATACTGGGTATCTTGAGTATGGAAGAG
g__Shewanella, 791973	k__Bacteria, p__Proteobacteria, c__Gammaproteobacteria, o__Alteromonadales, f__Shewanellaceae, g__Shewanella, s__	34	0	0	0	0	0	0	0	0	0	0	0	0	0	0	0	0	0	0	0	0	0	0	0	0	10	0	0	1	9	0	1	5	7	0	0	0	0	0	0	0	0	0	0	1	GTGCCAGCAGCCGCGGTAATACAGAGGGTGCAAGCGTTAATCGGAATTACTGGGCGTAAAGCGTGCGCAGGCGGTTTGTTAAGCGAGATGTGAAAGCCCTGGGCTCAACCTAGGAATAGCATTTCGAACTGGCGAACTAGAGTCTTGTAGA
o__Burkholderiales, 788519	k__Bacteria, p__Proteobacteria, c__Betaproteobacteria, o__Burkholderiales, f__, g__, s__	53	0	0	0	0	0	0	0	0	0	0	0	0	0	0	0	0	0	0	0	0	0	0	6	0	0	4	0	0	0	0	0	0	0	0	0	0	18	0	24	0	0	1	0	0	GTGCCAGCAGCCGCGGTAATACGTAGGGTGCAAGCGTTAATCGGAATTACTGGGCGTAAAGCGTGCGCAGGCGGTTGTGTAAGTCAGATGTGAAATCCCCGGGCTCAACCTGGGAATTGCATTTGAGACTGCACGGCTAGAGTGTGTCAGA
g__Azoarcus, 788334	k__Bacteria, p__Proteobacteria, c__Betaproteobacteria, o__Rhodocyclales, f__Rhodocyclaceae, g__Azoarcus, s__	2	0	0	0	0	0	2	0	0	0	0	0	0	0	0	0	0	0	0	0	0	0	0	0	0	0	0	0	0	0	0	0	0	0	0	0	0	0	0	0	0	0	0	0	0	GCAGCCGCGGTAATACGTAGGGTGCGAGCGTTAATCGGAATTACTGGGCGTAAAGCGTGCGCAGGCGGTTGTGCAAGACAGGTGTGAAATCCCCGGGCTCAACCTGGGAACTGCGCTTGTGACTGCACGGCTAGAGTACGGCAGAGG
g__Bacillus, 788205	k__Bacteria, p__Firmicutes, c__Bacilli, o__Bacillales, f__Bacillaceae, g__Bacillus, s__	11	0	0	0	0	0	0	0	0	0	0	0	0	0	0	0	0	0	9	0	0	0	0	0	0	0	0	0	0	0	0	0	0	2	0	0	0	0	0	0	0	0	0	0	0	AGCAGCCGCGGTAATACGTAGGTGGCAAGCGTTGTCCGGAATTATTGGGCGTAAAGCGCGCGCAGGCGGTCTCTTAAGTCTGATGTGAAAGCCCACGGCTCAACCGTGGAGGGTCATTGGAAACTGGGAGACTTGAGTGCAGAAGAGG
f__Methylobacteriaceae, 785526	k__Bacteria, p__Proteobacteria, c__Alphaproteobacteria, o__Rhizobiales, f__Methylobacteriaceae, g__, s__	41	0	0	0	0	0	0	16	0	0	0	0	0	0	0	0	0	0	0	0	0	0	0	1	0	3	0	0	3	0	0	0	0	2	0	12	4	0	0	0	0	0	0	0	0	GTGCCAGCAGCCGCGGTAATACGAAGGGGGCTAGCGTTGCTCGGAATCACTGGGCGTAAAGGGCGCGTAGGCGGCCGATTAAGTCGGGGGTGAAAGCCTGTGGCTCAACCACAGAATTGCCTTCGATACTGGTTGGCTTGAGACCGGAAGAG
f__Comamonadaceae, 783719	k__Bacteria, p__Proteobacteria, c__Betaproteobacteria, o__Burkholderiales, f__Comamonadaceae, g__, s__	1096	1	0	0	0	0	435	0	0	0	0	0	5	0	0	0	0	9	0	0	0	1	0	233	0	0	0	4	33	0	0	0	0	0	287	0	2	1	14	67	0	0	1	3	0	GTGCCAGCAGCCGCGGTAATACGTAGGGTGCAAGCGTTAATCGGAATTACTGGGCGTAAAGCGTGCGCAGGCGGTTATGCAAGACAGAGGTGAAATCCCCGGGCTCAACCTGGGAACTGCCTTTGTGACTGCATGGCTAGAGTACGGTAGAG
o__EW055, 783209	k__Bacteria, p__TM7, c__TM7-3, o__EW055, f__, g__, s__	2	0	0	0	0	0	0	0	0	0	0	0	0	0	0	0	0	0	0	0	0	0	0	2	0	0	0	0	0	0	0	0	0	0	0	0	0	0	0	0	0	0	0	0	0	GTGCCAGCAGCCGCGGTCATACGTAGGGTGCAAGCATTATCCGGAGTGACTGGGCGTAAAGAGTTGCGTAGGTGGTTAGTAAAGTGAATAGTGAAACCTGGTGGCTCAACCATACAGACTATTATTCAAACTCACTAACTCGAGAGTGGTA
f__Enterobacteriaceae, 778478	k__Bacteria, p__Proteobacteria, c__Gammaproteobacteria, o__Enterobacteriales, f__Enterobacteriaceae, g__, s__	949	0	133	10	35	18	0	44	38	85	84	0	0	0	11	17	86	1	127	98	55	21	24	1	9	0	11	0	1	6	3	3	0	0	5	3	8	5	1	0	4	0	0	0	2	AGCAGCCGCGGTAATACGGAGGGTGCAAGCGTTAATCGGAATTACTGGGCGTAAAGCGCACGCAGGCGGTTTGTTAAGTCAGATGTGAAATCCCCGCGCTTAACGTGGGAACTGCATTTGAAACTGGCAAGCTAGAGTCTTGTAGAGGG
f__Pseudomonadaceae, 769643	k__Bacteria, p__Proteobacteria, c__Gammaproteobacteria, o__Pseudomonadales, f__Pseudomonadaceae, g__, s__	722	0	0	154	25	1	0	10	0	74	7	80	0	0	0	0	0	0	0	0	14	19	37	2	0	8	11	4	1	6	2	4	1	8	1	83	12	98	38	3	16	0	1	1	1	AGCAGCCGCGGTAATACAGAGGGTGCAAGCGTTAATCGGAATTACTGGGCGTAAAGCGCGCGTAGGTGGTTTGTTAAGTTGGATGTGAAATCCCCGGGCTCAACCTGGGAACTGCATCCAAAACTGGCAAGCTAGAGTATGGTAGAGGG
g__Yersinia, 759061	k__Bacteria, p__Proteobacteria, c__Gammaproteobacteria, o__Enterobacteriales, f__Enterobacteriaceae, g__Yersinia, s__	255742	30	26	457	3	0	0	46	15	87	13	26	0	0	67	8	71	45	39	25	47	0	2	826	791	1099	1227	1323	281	999	231	1759	1521	436	405	582	211	494	481	374	5871	27262	98061	70246	40255	CGTGCCAGCAGCCGCGGTAATACGGAGGGTGCAAGCGTTAATCGGAATTACTGGGCGTAAAGCGCACGCAGGCGGTTTGTTAAGTCAGATGTGAAATCCCCGAGCTTAACTTGGGAACTGCATTTGAAACTGGCAAGCTAGAGTCTTGTAGAG
f__Comamonadaceae, 750411	k__Bacteria, p__Proteobacteria, c__Betaproteobacteria, o__Burkholderiales, f__Comamonadaceae, g__, s__	506	0	0	0	0	0	0	0	0	0	0	0	0	0	0	0	0	0	0	0	0	0	0	34	0	0	1	0	33	0	0	5	3	0	353	8	0	29	5	17	0	1	1	13	3	GTGCCAGCAGCCGCGGTAATACGTAGGGTGCGAGCGTTAATCGGAATTACTGGGCGTAAAGCGTGCGCAGGCGGTGATGTAAGACAGATGTGAAATCCCCGGGCTCAACCTGGGACCTGCATTTGTGACTGCATCGCTAGAGTACGGTAGAG
o__Rhizobiales, 750263	k__Bacteria, p__Proteobacteria, c__Alphaproteobacteria, o__Rhizobiales, f__, g__, s__	1851	0	0	0	0	0	13	3	0	0	0	0	3	0	21	0	1	1628	101	20	21	25	1	8	0	0	0	0	1	0	0	0	0	0	3	0	0	0	0	2	0	0	0	0	0	AGCAGCCGCGGTAATACGAAGGGGGCTAGCGTTGTTCGGAATTACTGGGCGTAAAGCGCACGTAGGCGGGTCGTTAAGTCAGGGGTGAAATCCCGGAGCTCAACTCCGGAACTGCCTTTGATACTGGCGATCTTGAGATCGGAAGAGGT
o__Sphingobacteriales, 749727	k__Bacteria, p__Bacteroidetes, c__Sphingobacteriia, o__Sphingobacteriales, f__, g__, s__	33	0	0	0	0	0	0	0	0	0	0	0	0	0	0	0	0	0	0	0	0	0	0	3	0	0	0	0	0	0	0	0	0	0	0	0	0	0	0	28	0	0	0	2	0	GTGCCAGCAGCCGCGGTAATACGAAGGATCCAAGCGTTGTCCGGATTTACTGGGTTTAAAGGGTGCGTAGGCGGGGAATTAAGTCAGTGGTGAAAGCTGGTAGCTCAACTATCAAATTGCCATTGAAACTGATTCTCTCGAGTACGGTTGA
f__Sphingomonadaceae, 749696	k__Bacteria, p__Proteobacteria, c__Alphaproteobacteria, o__Sphingomonadales, f__Sphingomonadaceae, g__, s__	5	0	0	0	0	0	0	0	0	0	0	0	0	0	0	0	0	0	0	0	0	0	0	0	0	0	2	1	0	1	0	0	0	0	0	1	0	0	0	0	0	0	0	0	0	AGCAGCCGCGGTAATACGGAGGGGGCTAGCGTTGTTCGGAATTACTGGGCGTAAAGCGCACGTAGGCGGTTACTCAAGTCAGAGGTGAAAGCCCGGGGCTCAACCCCGGAACTGCCTTTGAAACTAGGTGACTAGAATCTTGGAGAGGC
g__Mycetocola, 748636	k__Bacteria, p__Actinobacteria, c__Actinobacteria, o__Actinomycetales, f__Microbacteriaceae, g__Mycetocola, s__	3	0	0	0	0	0	3	0	0	0	0	0	0	0	0	0	0	0	0	0	0	0	0	0	0	0	0	0	0	0	0	0	0	0	0	0	0	0	0	0	0	0	0	0	0	GCAGCCGCGGTAATACGTAGGGTGCAAGCGTTGTCCGGAATTATTGGGCGTAAAGAGCTCGTAGGCGGTTTGTCGCGTCTGCTGTGAAATCCCGAGGCTCAACCTCGGGCCTGCAGTGGGTACGGGCAGACTAGAGTGCGGTAGGGG
f__Enterobacteriaceae, 744029	k__Bacteria, p__Proteobacteria, c__Gammaproteobacteria, o__Enterobacteriales, f__Enterobacteriaceae, g__, s__	6	0	0	0	0	0	0	0	0	0	0	0	0	0	0	0	0	0	0	0	0	0	0	0	0	0	1	0	0	0	0	0	0	0	0	0	0	0	0	0	1	0	1	2	1	GTGCCAGCAGCCGCGGTAATACGGAGGGTGCAAGCGTTAATCGGAATTACTGGGCGTAAAGCGCACGCAGGCGGTTTGTTAAGTTAGATGTGAAATCCCCGGGCTTAACCTGGGAACTGCATTTAAAACTGGCAAGCTAGAGTCTTGTAGA
g__Corynebacterium, 743755	k__Bacteria, p__Actinobacteria, c__Actinobacteria, o__Actinomycetales, f__Corynebacteriaceae, g__Corynebacterium, s__	46	0	0	0	0	0	0	0	0	0	0	0	0	0	0	0	0	0	0	0	0	0	0	0	0	8	32	0	0	0	0	0	0	0	0	1	5	0	0	0	0	0	0	0	0	GTGCCAGCAGCCGCGGTAATACGTAGGGTGCAAGCGTTGTCCGGATTTACTGGGCGTAAAGAGCTCGTAGGTGGTGTGTCGCGTCGTCTGTGAAATTCCGGGGCTTAACTCCGGGCGTGCAGGCGATACGGGCACGACTAGAGTGCTGTAG
g__Zoogloea, 741284	k__Bacteria, p__Proteobacteria, c__Betaproteobacteria, o__Rhodocyclales, f__Rhodocyclaceae, g__Zoogloea, s__	21	0	0	0	0	0	15	0	0	0	0	0	0	0	0	0	0	6	0	0	0	0	0	0	0	0	0	0	0	0	0	0	0	0	0	0	0	0	0	0	0	0	0	0	0	AGCAGCCGCGGTAATACGTAGGGTGCGAGCGTTAATCGGAATTACTGGGCGTAAAGCGTGCGCAGGCGGTTGTGTAAGACAGATGTGAAATCCCCGGGCTCAACCTGGGAACTGCGTTTGTGACTGCACGACTAGAGTACGGCAGAGG
g__Sphingomonas, 734945	k__Bacteria, p__Proteobacteria, c__Alphaproteobacteria, o__Sphingomonadales, f__Sphingomonadaceae, g__Sphingomonas, s__	596	170	84	126	0	27	0	0	19	88	3	14	1	0	29	0	32	0	0	0	0	0	0	0	0	0	0	0	0	0	0	0	0	0	0	0	2	0	0	0	0	1	0	0	0	AGCAGCCGCGGTAATACGGAGGGAGCTAGCGTTGTTCGGAATTACTGGGCGTAAAGCGCACGTAGGCGGCTTTGTAAGTCAGAGGTGAAAGCCTGGAGCTCAACTCCAGAACTGCCTTTGAGACTGCATCGCTTGAATCCAGGAGAGGT
g__Polaromonas, 732386	k__Bacteria, p__Proteobacteria, c__Betaproteobacteria, o__Burkholderiales, f__Comamonadaceae, g__Polaromonas, s__	683	0	0	0	0	0	0	0	0	0	0	0	23	0	0	0	0	0	0	0	8	0	0	16	0	0	0	0	229	0	0	0	0	0	405	0	0	0	2	0	0	0	0	0	0	GTGCCAGCAGCCGCGGTAATACGTAGGGTGCAAGCGTTAATCGGAATTACTGGGCGTAAAGCGTGCGCAGGCGGTGATGTAAGACAGAGGTGAAATCCCCGGGCTCAACCTGGGAACTGCCTTTGTGACTGCATCGCTGGAGTACGGCAGAG
f__Comamonadaceae, 731707	k__Bacteria, p__Proteobacteria, c__Betaproteobacteria, o__Burkholderiales, f__Comamonadaceae, g__, s__	873	0	0	0	0	0	3	0	0	0	0	0	0	0	0	0	0	811	0	1	0	0	0	0	0	21	0	11	0	0	1	0	0	1	0	0	13	0	0	0	0	2	0	6	3	AGCAGCCGCGGTAATACGTAGGGTGCAAGCGTTAATCGGAATTACTGGGCGTAAAGCGTGCGCAGGCGGTGATGTAAGACAGTTGTGAAATCCCCGGGCTCAACCTGGGAACTGCATCTGTGACTGCATCGCTGGAGTGCGGCAGAGGG
f__Comamonadaceae, 719367	k__Bacteria, p__Proteobacteria, c__Betaproteobacteria, o__Burkholderiales, f__Comamonadaceae, g__, s__	10	0	0	0	0	0	0	0	0	0	0	0	0	0	0	0	0	0	0	0	0	0	0	7	0	0	0	0	0	0	0	0	0	0	2	0	0	0	0	1	0	0	0	0	0	GTGCCAGCAGCCGCGGTAATACGTAGGGTGCAAGCGTTAATCGGAATTACTGGGCGTAAAGCGTGCGCAGGCGGTGATGTAAGACAGATGTGAAATCCCCGGGCTCAACCTGGGACCTGCATTTGTGACTGCATCGCTAGAGTACGGTAGA
g__Rhodanobacter, 714231	k__Bacteria, p__Proteobacteria, c__Gammaproteobacteria, o__Xanthomonadales, f__Xanthomonadaceae, g__Rhodanobacter, s__	27	0	0	0	0	0	0	0	0	0	0	0	0	0	0	0	0	0	0	0	0	0	0	1	0	22	0	0	0	0	0	0	0	0	0	0	0	4	0	0	0	0	0	0	0	GTGCCAGCAGCCGCGGTAATACGAAGGGTGCAAGCGTTAATCGGAATTACTGGGCGTAAAGGGTGCGTAGGCGGTTCGTTAAGTCTGTCGTGAAATCCCCGGGCTCAACCTGGGAATGGCGATGGATACTGGCGAGCTAGAGTGTGTCAGA
g__Labrys, 713335	k__Bacteria, p__Proteobacteria, c__Alphaproteobacteria, o__Rhizobiales, f__Xanthobacteraceae, g__Labrys, s__	171	0	0	0	0	0	142	0	0	0	1	0	0	0	0	0	0	14	0	0	0	0	0	3	0	0	0	0	8	0	0	0	0	0	3	0	0	0	0	0	0	0	0	0	0	AGCAGCCGCGGTAATACGAAGGGGGCTAGCGTTGTTCGGAATTACTGGGCGTAAAGCGCACGTAGGCGGATTGTTAAGTCGGGGGTGAAATCCTGAGGCTCAACCTCAGAACTGCCTTCGATACTGGCGATCTTGAGTTCGGAAGAGGT
f__Micrococcaceae, 711526	k__Bacteria, p__Actinobacteria, c__Actinobacteria, o__Actinomycetales, f__Micrococcaceae, g__, s__	4	0	0	0	0	0	0	0	0	0	0	0	0	0	0	0	0	0	0	0	0	0	0	0	0	3	0	0	0	0	0	0	0	0	1	0	0	0	0	0	0	0	0	0	0	GTGCCAGCAGCCGCGGTAATACGTAGGGCGCAAGCGTTGTCCGGAATTATTGGGCGTAAAGAGCTCGTAGGCGGCTTGTCGCGTCTGCTGTGAAAGCCCGGGGCTTAACCCCGGGTGTGCAGTGGGTACGGGCAGGCTAGAGTGCAGTAGG
g__Acinetobacter, 706432	k__Bacteria, p__Proteobacteria, c__Gammaproteobacteria, o__Pseudomonadales, f__Moraxellaceae, g__Acinetobacter, s__	2	0	0	0	0	0	0	0	0	0	0	0	0	0	0	0	0	0	0	0	0	0	0	0	0	0	0	0	1	0	0	0	1	0	0	0	0	0	0	0	0	0	0	0	0	GTGCCAGCAGCCGCGGTAATACAGAGGGTGCGAGCGTTAATCGGATTTACTGGGCGTAAAGCGTGCGTAGGCGGCCAATTAAGTCAAATGTGAAATCCCCGAGCTTAACTTGGGAATTGCATTCGATACTGGTTGGCTAGAGTATGGGAGA
f__Oxalobacteraceae, 699224	k__Bacteria, p__Proteobacteria, c__Betaproteobacteria, o__Burkholderiales, f__Oxalobacteraceae, g__, s__	2	0	0	0	0	0	0	0	0	0	0	0	0	0	0	0	0	0	0	0	0	0	0	0	0	0	0	0	0	0	0	0	0	0	1	0	0	0	0	0	0	0	0	1	0	GTGCCAGCAGCCGCGGTAATACGTAGGGTGCAAGCGTTAATCGGAATTACTGGGCGTAAAGCGTGCGCAGGCGGTTGTGTAAGACAGATGTGAAATCCCCGGGCTCAACCTGGGAATTGCATTTGTGACTGCACGGCCTANGGNTGTGTCAGA
g__Flavobacterium, 699027	k__Bacteria, p__Bacteroidetes, c__Flavobacteriia, o__Flavobacteriales, f__Flavobacteriaceae, g__Flavobacterium, s__	2	0	0	0	0	0	0	0	0	0	0	0	0	0	0	0	0	0	0	0	0	0	0	0	0	0	0	0	1	0	0	0	0	0	0	0	0	0	0	1	0	0	0	0	0	GTGCCAGCAGCCGCGGTAATACGGAGGATCCAAGCGTTATCCGGAATCATTGGGTTTAAAGGGTCCGTAGGCGGTTTAATAAGTCAGTGGTGAAAGCCCATCGCTCAACGGTGGAACGGCCATTGATACTGTTAAACTTGAATTATTAGGA
g__Pleomorphomonas, 694856	k__Bacteria, p__Proteobacteria, c__Alphaproteobacteria, o__Rhizobiales, f__Methylocystaceae, g__Pleomorphomonas, s__	4	0	0	0	0	0	0	0	0	0	0	0	0	0	0	0	0	0	0	0	0	0	0	0	0	0	0	0	0	0	0	0	0	0	0	0	0	0	0	0	4	0	0	0	0	AGCAGCCGCGGTAATACGAAGGGGGCTAGCGTTGTTCGGAATTACTGGGCGTAAAGCGCACGTAGGCGGACATTTAAGTCAGGGGTGAAATCCCAGGGCTCAACCCTGGAACTGCCTTTGATACTGGGTGTCTTGAGTACGAGAGAGG
o__Sphingomonadales, 690867	k__Bacteria, p__Proteobacteria, c__Alphaproteobacteria, o__Sphingomonadales, f__, g__, s__	22	0	0	0	0	0	4	0	0	0	0	0	0	0	0	0	0	17	0	0	0	1	0	0	0	0	0	0	0	0	0	0	0	0	0	0	0	0	0	0	0	0	0	0	0	AGCAGCCGCGGTAATACGGAGGGAGCTAGCGTTGTTCGGAATTACTGGGCGTAAAGCGTGCGTAGGCGGCTATTCAAGTCAGAGGTGAAAGCCTGGAGCTCAACTCCAGAACTGCCTTTGAAACTAGATAGCTAGAATCTTGGAGAGG
s__fascians, 689950	k__Bacteria, p__Actinobacteria, c__Actinobacteria, o__Actinomycetales, f__Nocardiaceae, g__Rhodococcus, s__fascians	4	0	0	0	0	0	0	0	0	0	0	0	0	0	0	0	0	0	0	0	0	0	0	4	0	0	0	0	0	0	0	0	0	0	0	0	0	0	0	0	0	0	0	0	0	GTGCCAGCAGCCGCGGTAATACGTAGGGTGCGAGCGTTGTCCGGAATTACTGGGCGTAAAGAGTTCGTAGGCGGTTTGTCGCGTCGTTTGTGAAAACCCGGGGCTCAACTTCGGGCTTGCAGGCGATACGGGCAGACTTGAGTGTTTCAGG
g__Erwinia, 688934	k__Bacteria, p__Proteobacteria, c__Gammaproteobacteria, o__Enterobacteriales, f__Enterobacteriaceae, g__Erwinia, s__	67	0	0	0	0	0	0	0	0	0	0	0	0	0	0	0	0	0	0	0	0	0	0	0	0	0	0	0	0	0	0	1	0	1	0	0	0	0	0	0	2	10	30	17	6	GTGCCAGCAGCCGCGGTAATACGGAGGGTGCAAGCGTTAATCGGAATTACTGGGCGTAAAGCGCACGCAGGCGGTTTGTTAAGTCAGATGTGAAATCCCCGGGCTTAACCTGGGAACTGCATTTGAAACTGGCAGGCTAGAGTCTTGTAGA
f__Carnobacteriaceae, 686789	k__Bacteria, p__Firmicutes, c__Bacilli, o__Lactobacillales, f__Carnobacteriaceae, g__, s__	193	0	69	0	0	0	0	0	0	0	0	0	0	0	0	0	43	0	0	24	49	0	0	0	0	0	0	0	0	0	0	0	0	0	0	0	8	0	0	0	0	0	0	0	0	AGCAGCCGCGGTAATACGTAGGTGGCAAGCGTTGTCCGGATTTATTGGGCGTAAAGCGAGCGCAGGCGGTTCTTTAAGTCTGATGTGAAAGCCCCCGGCTCAACCGGGGAGGGTCATTGGAAACTGGAGAACTTGAGTGCAGAAGAGGA
o__Sphingomonadales, 674655	k__Bacteria, p__Proteobacteria, c__Alphaproteobacteria, o__Sphingomonadales, f__, g__, s__	122	0	0	0	0	0	22	0	0	0	0	0	1	0	0	0	0	0	0	0	0	0	0	48	0	0	0	0	0	0	0	0	0	0	0	0	0	0	0	51	0	0	0	0	0	GTGCCAGCAGCCGCGGTAATACGGAGGGAGCTAGCGTTGTTCGGAATTACTGGGCGTAAAGCGCGCGTAGGCGGTTTTTTAAGTCAGAGGTGAAAGCCCAGTGCTCAACACTGGAACTGCCTTTGAAACTGGAAAACTTGAATCTTGGAGAG
g__Rubrivivax, 672144	k__Bacteria, p__Proteobacteria, c__Betaproteobacteria, o__Burkholderiales, f__Comamonadaceae, g__Rubrivivax, s__	23	0	0	0	0	0	0	0	0	0	0	0	0	0	0	0	0	0	0	0	0	0	0	0	0	0	0	0	0	0	0	0	0	0	2	0	21	0	0	0	0	0	0	0	0	GTGCCAGCAGCCGCGGTAATACGTAGGGTGCAAGCGTTAATCGGAATTACTGGGCGTAAAGCGTGCGCAGGCGGTCTTGCAAGACAGATGTGAAATCCCCGGGCTCAACCTGGGAACTGCATTTGTGACTGCAAGGCTAGAGTACGGTAGA
s__capsulatum, 668105	k__Bacteria, p__Proteobacteria, c__Alphaproteobacteria, o__Sphingomonadales, f__Sphingomonadaceae, g__Novosphingobium, s__capsulatum	3507	0	0	0	0	0	0	20	0	0	0	0	0	0	0	0	0	0	0	0	0	0	0	117	86	324	371	194	65	197	35	582	487	210	49	156	82	186	160	2	59	7	1	0	117	CGTGCCAGCAGCCGCGGTAATACGGAGGGAGCTAGCGTTGTTCGGAATTACTGGGCGTAAAGCGCACGTAGGCGGTTACTCAAGTCAGAGGTGAAAGCCCGGGGCTCAACCCCGGAACTGCCTTTGAAACTAGGTGACTGGAATCTTGGAGAG
f__Enterobacteriaceae, 667570	k__Bacteria, p__Proteobacteria, c__Gammaproteobacteria, o__Enterobacteriales, f__Enterobacteriaceae, g__, s__	6	2	0	0	1	0	0	0	0	0	0	1	0	0	0	0	1	0	0	0	0	0	1	0	0	0	0	0	0	0	0	0	0	0	0	0	0	0	0	0	0	0	0	0	0	GCAGCCGCGGTAATACGGAGGGTGCAAGCGTTAATCGGAATTACTGGGCGTAAAGCGCACGCAGGCGGTTTGTTAAGTCAGATGTGAAATCCCCGGGCTCAACCTGGGAACTGCATTTGAAACTGGCAAGCTTGAGTCTCGTAGAGG
f__Chitinophagaceae, 665869	k__Bacteria, p__Bacteroidetes, c__[Saprospirae], o__[Saprospirales], f__Chitinophagaceae, g__, s__	2	0	0	0	0	0	0	0	0	0	0	0	0	0	0	0	0	0	0	0	0	0	0	0	0	0	0	0	0	0	0	0	0	0	2	0	0	0	0	0	0	0	0	0	0	GTGCCAGCAGCCGCGGTAATACGGAGGGTGCAAGCGTTATCCGGATTCACTGGGTTTAAAGGGAGCGTAGGTGGGTCTGTAAGTCAGTGGTGAAATCTCCGAGCTTAACTCGGAAACTGCCATTGATACTATAGGTCTTGAATTATCTGGA
f__Pirellulaceae, 655207	k__Bacteria, p__Planctomycetes, c__Planctomycetia, o__Pirellulales, f__Pirellulaceae, g__, s__	69	0	0	0	0	0	0	0	0	0	0	0	0	0	0	0	0	0	0	0	0	0	0	0	0	0	5	20	0	6	0	0	0	0	0	35	3	0	0	0	0	0	0	0	0	GTGCCAGCAGCCGCGGTAAGACGAACCTTGCTAACGTTATTCGGAATTACTGGGCTTAAAGGGTGCGTAGGCGGTGCAGAAAGTCGGGTGTGAAATCCCCCAGCTCAACTGAGGAATTGCGCCCGAAACTACTGTGCTTGAGGAAGATAGA
g__Mycetocola, 646129	k__Bacteria, p__Actinobacteria, c__Actinobacteria, o__Actinomycetales, f__Microbacteriaceae, g__Mycetocola, s__	6	0	0	0	0	0	2	0	0	0	1	0	0	0	0	0	0	3	0	0	0	0	0	0	0	0	0	0	0	0	0	0	0	0	0	0	0	0	0	0	0	0	0	0	0	GCAGCCGCGGTAATACGTAGGGTGCAAGCGTTGTCCGGAATTATTGGGCGTAAAGAGCTCGTAGGCGGTTTGTCGCGTCTGCTGTGAAATCCCGAGGCTCAACCTCGGGTCTGCAGTGGGTACGGGCAGACTAGAGTGCGGTAGGGG
g__Delftia, 637901	k__Bacteria, p__Proteobacteria, c__Betaproteobacteria, o__Burkholderiales, f__Comamonadaceae, g__Delftia, s__	21603	210	288	421	378	206	7	128	18	577	36	322	2	421	312	248	642	2911	89	113	276	293	373	6145	47	90	294	314	751	61	9	87	70	16	2140	32	31	106	36	2606	120	86	50	180	61	CGTGCCAGCAGCCGCGGTAATACGTAGGGTGCGAGCGTTAATCGGAATTACTGGGCGTAAAGCGTGCGCAGGCGGTTATGTAAGACAGATGTGAAATCCCCGGGCTCAACCTGGGAACTGCATTTGTGACTGCATGGCTAGAGTACGGTAGAG
g__Sulfuritalea, 620845	k__Bacteria, p__Proteobacteria, c__Betaproteobacteria, o__Rhodocyclales, f__Rhodocyclaceae, g__Sulfuritalea, s__	2	0	0	0	0	0	0	0	0	0	0	0	0	0	0	0	0	0	0	0	0	0	0	0	0	0	0	0	0	0	0	0	0	0	1	0	0	0	0	1	0	0	0	0	0	GTGCCAGCAGCCGCGGTAATACGTAGGGTGCGAGCGTTAATCGGAATTACTGGGCGTAAAGCGTGCGCAGGCGGTTATATAAGACAGATGTGAAATCCCCGGGCTCAACCTGGGAACTGCGTTTGTGACTGTATAACTTGAGTGTGGCAGA
g__Rhodoplanes, 616682	k__Bacteria, p__Proteobacteria, c__Alphaproteobacteria, o__Rhizobiales, f__Hyphomicrobiaceae, g__Rhodoplanes, s__	17	0	0	0	0	0	9	0	8	0	0	0	0	0	0	0	0	0	0	0	0	0	0	0	0	0	0	0	0	0	0	0	0	0	0	0	0	0	0	0	0	0	0	0	0	GCAGCCGCGGTAATACGAAGGGGGCTAGCGTTGCTCGGAATCACTGGGCGTAAAGCGCACGTAGGCGGACTCTTAAGTCGGTGGTGAAATCCTGGAGCTCAACTCCAGAACTGCCTTCGATACTGGGAGTCTCGAGTTCGGGAGAGG
g__Curvibacter, 610486	k__Bacteria, p__Proteobacteria, c__Betaproteobacteria, o__Burkholderiales, f__Comamonadaceae, g__Curvibacter, s__	3871	0	118	1	97	1	2318	1	14	319	38	0	18	0	0	31	0	3	0	3	0	0	0	63	0	0	8	5	229	1	1	6	2	1	570	0	5	11	0	4	0	0	3	0	0	AGCAGCCGCGGTAATACGTAGGGTGCGAGCGTTAATCGGAATTACTGGGCGTAAAGCGTGCGCAGGCGGTTATGTAAGACAGATGTGAAATCCCCGGGCTCAACCTGGGAACTGCATTAGTGACTGCATAGCTGGAGTACGGCAGAGGG
g__Lactobacillus, 592160	k__Bacteria, p__Firmicutes, c__Bacilli, o__Lactobacillales, f__Lactobacillaceae, g__Lactobacillus, s__	2	0	0	0	0	0	0	0	0	0	0	0	0	0	0	0	0	0	0	0	0	0	0	0	0	0	0	0	0	0	0	0	0	0	2	0	0	0	0	0	0	0	0	0	0	GTGCCAGCAGCCGCGGTAATACGTAGGTGGCAAGCGTTGTCCGGATTTATTGGGCGTAAAGCGAGTGCAGGCGGTTCAATAAGTCTGATGTGAAAGCCTTCGGCTCAACCGGAGAATTGCATCAGAAACTGTTGAACTTGAGTGCAGAAGA
s__intermedium, 591634	k__Bacteria, p__Proteobacteria, c__Alphaproteobacteria, o__Rhizobiales, f__Brucellaceae, g__Ochrobactrum, s__intermedium	47	0	0	0	0	0	0	0	0	47	0	0	0	0	0	0	0	0	0	0	0	0	0	0	0	0	0	0	0	0	0	0	0	0	0	0	0	0	0	0	0	0	0	0	0	GCAGCCGCGGTAATACGAAGGGGGCTAGCGTTGTTCGGATTTACTGGGCGTAAAGCGCACGTAGGCGGGCTAATAAGTCAGGGGTGAAATCCCGGGGCTCAACCCCGGAACTGCCTTTGATACTGTTAGTCTTGAGTATGGTAGAGG
g__Mycobacterium, 591521	k__Bacteria, p__Actinobacteria, c__Actinobacteria, o__Actinomycetales, f__Mycobacteriaceae, g__Mycobacterium, s__	17	0	0	0	0	0	0	0	0	0	0	0	5	0	0	0	0	0	0	0	0	0	10	0	0	0	0	0	0	0	0	0	0	0	0	1	0	0	0	1	0	0	0	0	0	AGCAGCCGCGGTAATACGTAGGGTGCGAGCGTTGTCCGGAATTACTGGGCGTAAAGAGCTCGTAGGTGGTTTGTCGCGTTGTTCGTGAAATCTCACGGCTTAACTGTGAGCGTGCGGGCGATACGGGCAGACTTGAGTACTGCAGGGGA
o__Sphingobacteriales, 591337	k__Bacteria, p__Bacteroidetes, c__Sphingobacteriia, o__Sphingobacteriales, f__, g__, s__	59107	0	63	0	0	53	1565	179	74	499	90	129	46	177	132	112	1	2148	0	39	28	0	109	2949	1339	3469	4582	2526	294	4344	509	8026	6472	1858	6045	1641	617	2035	2030	2897	648	97	50	52	1183	CGTGCCAGCAGCCGCGGTAAGACGAAGGATGCAAGCGTTATCCGGATTCATTGGGTTTAAAGGGTGCGTAGGCGGACCTGTAAGTCAGTGGTGAAATCTCTCAGCTTAACTGAGAAACTGCCATTGATACTGCAGGTCTAGAGTATAGATGA
f__Comamonadaceae, 590960	k__Bacteria, p__Proteobacteria, c__Betaproteobacteria, o__Burkholderiales, f__Comamonadaceae, g__, s__	2	0	0	0	0	0	0	0	0	0	0	0	0	0	0	0	0	0	0	0	0	2	0	0	0	0	0	0	0	0	0	0	0	0	0	0	0	0	0	0	0	0	0	0	0	GCAGCCGCGGTAATACGTAGGGTGCGAGCGTTAATCGGAATTACTGGGCGTAAAGCGTGCGCAGGCGGTTATATAAGACAGATGTGAAGTCCCCCGGGCTCAACCTGGGACCTGCATTTGTGACTGCATAGCTAGAGTACGGTAGAGG
f__Legionellaceae, 590656	k__Bacteria, p__Proteobacteria, c__Gammaproteobacteria, o__Legionellales, f__Legionellaceae, g__, s__	35	0	0	0	0	0	32	0	0	0	0	0	3	0	0	0	0	0	0	0	0	0	0	0	0	0	0	0	0	0	0	0	0	0	0	0	0	0	0	0	0	0	0	0	0	GCAGCCGCGGTAATACGGAGGGTGCAAGCGTTAATCGGAATTACTGGGCGTAAAGGGTGCGTAGGTGGTTATATAAGTTATCTGTGAAATCCCCGGGCTTAACCTGGGCAGGTCAGATAAGACTGTATGACTTGAGTATGGGAGAGGG
g__Acidovorax, 590047	k__Bacteria, p__Proteobacteria, c__Betaproteobacteria, o__Burkholderiales, f__Comamonadaceae, g__Acidovorax, s__	39	0	0	0	0	0	12	0	0	0	0	0	0	0	0	0	0	18	0	2	1	0	0	1	0	0	0	1	0	0	0	1	0	0	0	0	0	0	0	3	0	0	0	0	0	AGCAGCCGCGGTAATACGTAGGGTGCAAGCGTTAATCGGAATTACTGGGCGTAAAGCGTGCGCAGGCGGTTATGCAAGACAGATGTGAAATCCCCGGGCTCAACCTGGGAACTGCATTTGTGACTGCATAGCTAGAGTACGGCAGAGG
g__Luteolibacter, 589956	k__Bacteria, p__Verrucomicrobia, c__Verrucomicrobiae, o__Verrucomicrobiales, f__Verrucomicrobiaceae, g__Luteolibacter, s__	2	0	0	0	0	0	2	0	0	0	0	0	0	0	0	0	0	0	0	0	0	0	0	0	0	0	0	0	0	0	0	0	0	0	0	0	0	0	0	0	0	0	0	0	0	GCAGCCGCGGTAATACGAAGGTCCCGAGCGTTGTTCGGAATCACTGGGCGTAAAGGGAGCGTAGGCGGTGCGGTAAGTCAGATGTGAAATCCCGGGGCTCAACCCCGGAACTGCATCCGATACTGCCGTGCTAGAGGATTGGAGAGG
g__Lactobacillus, 589114	k__Bacteria, p__Firmicutes, c__Bacilli, o__Lactobacillales, f__Lactobacillaceae, g__Lactobacillus, s__	4	0	0	0	0	0	0	0	0	0	0	0	0	0	0	0	0	0	0	0	0	0	0	0	0	0	0	0	0	0	0	0	0	0	4	0	0	0	0	0	0	0	0	0	0	GTGCCAGCAGCCGCGGTAATACGTAGGTGGCAAGCGTTGTCCGGATTTATTGGGCGTAAAGCGAGCGCAGGCGGAATGATAAGTCTGATGTGAAAGCCCACGGCTCAACCGTGGAACTGCATCGGAAACTGTCATTCTTGAGTGCAGAAGA
g__Vogesella, 589010	k__Bacteria, p__Proteobacteria, c__Betaproteobacteria, o__Neisseriales, f__Neisseriaceae, g__Vogesella, s__	2	0	0	0	0	0	0	0	0	0	0	0	0	0	0	0	0	0	0	0	0	0	0	0	0	0	0	0	0	0	0	0	2	0	0	0	0	0	0	0	0	0	0	0	0	GTGCCAGCAGCCGCGGTAATACGTAGGGTGCAAGCGTTAATCGGAATTACTGGGCGTAAAGCGTGCGCAGGCGGTTTGATAAGCCAGATGTGAAATCCCCGAGCTCAACTTGGGAACTGCGTTTGGAACTGTCAGACTAGAGTGCGTCAGA
g__Microbacterium, 587696	k__Bacteria, p__Actinobacteria, c__Actinobacteria, o__Actinomycetales, f__Microbacteriaceae, g__Microbacterium, s__	196	0	0	0	0	0	8	0	0	0	0	0	0	0	0	0	0	10	0	0	0	0	0	92	0	1	1	0	7	0	0	1	0	0	33	0	0	3	1	35	0	0	1	3	0	GTGCCAGCAGCCGCGGTAATACGTAGGGCGCAAGCGTTATCCGGAATTATTGGGCGTAAAGAGCTCGTAGGCGGTTTGTCGCGTCTGCTGTGAAATCCCGAGGCTCAACCTCGGGCCTGCAGTGGGTACGGGCAGACTAGAGTGCGGTAGGG
f__Phyllobacteriaceae, 586388	k__Bacteria, p__Proteobacteria, c__Alphaproteobacteria, o__Rhizobiales, f__Phyllobacteriaceae, g__, s__	560	0	0	0	0	0	163	18	0	0	0	0	4	0	0	0	0	4	0	0	0	0	0	27	0	0	0	0	71	0	0	0	0	0	268	0	0	0	0	5	0	0	0	0	0	GTGCCAGCAGCCGCGGTAATACGAAGGGGGCTAGCGTTGTTCGGAATTACTGGGCGTAAAGCGCACGTAGGCGGATTGTTAAGTTAGGGGTGAAATCCCAGGGCTCAACCCTGGAACTGCCTTTAATACTGGCAATCTAGAGTCCGAGAGAG
g__Comamonas, 586350	k__Bacteria, p__Proteobacteria, c__Betaproteobacteria, o__Burkholderiales, f__Comamonadaceae, g__Comamonas, s__	48	0	0	0	0	0	20	0	0	0	0	0	0	0	0	0	0	21	0	0	0	0	0	0	0	0	0	0	1	0	0	0	0	0	5	0	0	0	0	1	0	0	0	0	0	AGCAGCCGCGGTAATACGTAGGGTGCGAGCGTTAATCGGAATTACTGGGCGTAAAGCGTGCGCAGGCGGTTATGTAAGACAGAGGTGAAATCCCCGGGCTCAACCTGGGAACTGCCTTTGTGACTGCATGGCTAGAGTGCGGCAGAGGG
c__Alphaproteobacteria, 585070	k__Bacteria, p__Proteobacteria, c__Alphaproteobacteria, o__, f__, g__, s__	400	0	0	0	0	0	118	0	4	0	0	0	19	0	1	0	0	1	1	20	80	0	0	0	0	0	0	0	90	0	0	0	0	6	60	0	0	0	0	0	0	0	0	0	0	AGCAGCCGCGGTAATACGGAGGGAGCTAGCGTTGTTCGGAATTACTGGGCGTAAAGCGCACGTAGGCGGCTACTCAAGTCAGAGGTGAAAGCCCGGGGCTCAACCCCGGAACTGCCTTTGAAACTAGGTAGCTAGAATCTTGGAGAGGT
f__Micromonosporaceae, 584249	k__Bacteria, p__Actinobacteria, c__Actinobacteria, o__Actinomycetales, f__Micromonosporaceae, g__, s__	2	0	0	0	0	0	0	0	0	0	0	0	0	0	0	0	0	0	0	0	0	0	0	0	0	0	0	0	0	0	0	0	0	0	0	0	0	2	0	0	0	0	0	0	0	GTGCCAGCAGCCGCGGTAAGACGTAGGGCGCGAGCGTTGTCCGGATTTATTGGGCGTAAAGAGCTCGTAGGCGGCTTGTCGCGTCGACTGTGAAAACCCGCGGCTCAACTGCGGGCTTGCAGTCGATACGGGCAGGCTAGAGTTTGGTAGG
g__Zoogloea, 584010	k__Bacteria, p__Proteobacteria, c__Betaproteobacteria, o__Rhodocyclales, f__Rhodocyclaceae, g__Zoogloea, s__	218	0	0	0	0	0	93	1	0	0	0	0	0	0	0	0	0	124	0	0	0	0	0	0	0	0	0	0	0	0	0	0	0	0	0	0	0	0	0	0	0	0	0	0	0	AGCAGCCGCGGTAATACGTAGGGTGCGAGCGTTAATCGGAATTACTGGGCGTAAAGCGTGCGCAGGCGGTAATGTAAGACAGATGTGAAATCCCCGGGCTCAACCTGGGAACTGCGTTTGTGACTGCATCACTCGAGTACGGCAGAGGG
f__Armatimonadaceae, 583360	k__Bacteria, p__Armatimonadetes, c__Armatimonadia, o__Armatimonadales, f__Armatimonadaceae, g__, s__	2	0	0	0	0	0	0	0	0	0	0	0	0	0	0	0	0	0	0	0	0	0	0	2	0	0	0	0	0	0	0	0	0	0	0	0	0	0	0	0	0	0	0	0	0	GTGCCAGCAGCCGCGGTAATACGTAGGGGGCGAGCGTTGTCCGAAGTTACTGGGCGTAAAGCGCGCGTAGGCGGTTTCTTAAGTCTGGGGTGAAAGGTTCAGCGCTCAACGTGAACAGTGCCTTGGATACTGGGGAACTTGAGTCTGGGA
g__Sphingomonas, 582921	k__Bacteria, p__Proteobacteria, c__Alphaproteobacteria, o__Sphingomonadales, f__Sphingomonadaceae, g__Sphingomonas, s__	131	0	0	0	32	0	0	0	0	0	0	0	0	0	0	0	0	0	0	0	0	0	0	0	0	8	5	28	0	0	0	0	3	5	4	9	6	25	0	5	0	0	1	0	0	GTGCCAGCAGCCGCGGTAATACGGAGGGAGCTAGCGTTGTTCGGAATTACTGGGCGTAAAGCGCACGTAGGCGGCTTTGTAAGTTAGAGGTGAAAGCCTGGAGCTCAACTCCAGAACTGCCTTTAAGACTGCATCGCTTGAATCCAGGAGAG
s__stygium, 580916	k__Bacteria, p__Proteobacteria, c__Alphaproteobacteria, o__Sphingomonadales, f__Sphingomonadaceae, g__Novosphingobium, s__stygium	21	0	0	0	0	0	0	0	0	0	0	0	0	0	0	0	0	0	0	0	0	0	0	0	0	5	0	0	2	1	0	1	1	8	2	0	0	0	0	0	0	1	0	0	0	GTGCCAGCAGCCGCGGTAATACGGAGGGAGCTAGCGTTGTTCGGAATTACTGGGCGTAAAGAGTACGTAGGCGGCTATTCAAGTCAGAGGTGAAAGCCCGGGGCTCAACCCCGGAACTGCCTTTGAAACTAGGTAGCTAGAATCTTGGAGA
f__Bradyrhizobiaceae, 580625	k__Bacteria, p__Proteobacteria, c__Alphaproteobacteria, o__Rhizobiales, f__Bradyrhizobiaceae, g__, s__	4	0	0	0	0	0	0	0	0	0	0	0	0	0	0	0	0	0	0	0	0	0	0	0	0	0	0	0	0	0	0	0	0	0	0	0	0	0	0	0	4	0	0	0	0	GTGCCAGCAGCCGCGGTAATACGAAGGGGGCTAGCGTTGCTCGGAATCACTGGGCGTAAAGGGTGCGTAGGCGGGTCTTTAAGTCAGGGGTGAAATCCTGGAGCTCAACTCCAGAACTGCCTTTGATACTGAGGATCTTGAGTTCGGGAGA
g__Cupriavidus, 580571	k__Bacteria, p__Proteobacteria, c__Betaproteobacteria, o__Burkholderiales, f__Oxalobacteraceae, g__Cupriavidus, s__	3	0	0	0	0	0	3	0	0	0	0	0	0	0	0	0	0	0	0	0	0	0	0	0	0	0	0	0	0	0	0	0	0	0	0	0	0	0	0	0	0	0	0	0	0	GCAGCCGCGGTAATACGTAGGGTGCGAGCGTTAATCGGAATTACTGGGCGTAAAGCGTGCGCAGGCGGTTTTGTAAGACAGGCGTGAAATCCCCGAGCTCAACTTGGGAATGGCGCTTGTGACTGCAAGGCTAGAGTATGTCAGAGG
g__Comamonas, 579731	k__Bacteria, p__Proteobacteria, c__Betaproteobacteria, o__Burkholderiales, f__Comamonadaceae, g__Comamonas, s__	26970	2	4	11	0	1	5787	3	2	0	0	0	9	0	0	0	0	13	0	0	0	3	0	2692	21	0	57	47	8608	18	25	16	21	12	6836	5	9	24	20	2670	5	2	9	33	5	CGTGCCAGCAGCCGCGGTAATACGTAGGGTGCAAGCGTTAATCGGAATTACTGGGCGTAAAGCGTGCGCAGGCGGTTTTGTAAGACAGTGGTGAAATCCCCGGGCTCAACCTGGGAACTGCCATTGTGACTGCAAGGCTAGAGTGCGGCAGAG
c__Betaproteobacteria, 579413	k__Bacteria, p__Proteobacteria, c__Betaproteobacteria, o__, f__, g__, s__	43	0	0	0	0	0	0	0	0	0	0	0	0	0	0	0	0	0	0	0	0	0	0	1	0	0	0	1	2	0	0	0	0	0	21	0	1	0	0	16	0	0	0	0	1	GTGCCAGCAGCCGCGGTAATACGTAGGGTGCAAGCGTTAATCGGAATTACTGGGCGTAAAGCGTGTGCAGGCGGTTTTGTAAGACTGTCGTGAAATCCCCGGGCTCAACCTGGGAATGGCGATGGTGACTGCAAGGCTAGAGTTTGGCAGA
f__Methylophilaceae, 579328	k__Bacteria, p__Proteobacteria, c__Betaproteobacteria, o__Methylophilales, f__Methylophilaceae, g__, s__	77	0	0	0	0	0	0	0	0	0	0	0	2	0	0	0	0	0	0	0	0	0	0	2	0	0	0	0	37	0	0	9	5	0	22	0	0	0	0	0	0	0	0	0	0	GTGCCAGCAGCCGCGGTAATACGTAGGGTGCGAGCGTTAATCGGAATTACTGGGCGTAAAGCGTGCGCAGGCGGTTTGGCAAGTCAGATGTGAAATCCCCGAGCTCAACTTGGGAACTGCGTTTGAAACTGCCAGACTAGAATATGTCAGAG
f__Pirellulaceae, 579256	k__Bacteria, p__Planctomycetes, c__Planctomycetia, o__Pirellulales, f__Pirellulaceae, g__, s__	4	0	0	0	0	0	0	0	0	0	0	0	0	0	0	0	0	0	0	0	0	0	0	0	0	0	0	0	0	0	0	0	0	0	0	2	0	0	0	2	0	0	0	0	0	GTGCCAGCAGCCGCGGTAAGACGAACCGTACAAACGTTATTCGGAATCACTGGGCTTAAAGGGTGCGTAGGCGGCGGCGCAAGTTGGGTGTGAAATCNCTCGGCTCAACCGAGGAACTGCGCTCAGAACTGCGTTGCTTGAGGGAGATAGA
g__Gemmatimonas, 578951	k__Bacteria, p__Gemmatimonadetes, c__Gemmatimonadetes, o__Gemmatimonadales, f__Gemmatimonadaceae, g__Gemmatimonas, s__	3	0	0	0	0	0	0	0	0	0	0	0	0	0	0	0	0	0	0	0	0	0	0	0	0	0	0	0	0	0	0	0	0	0	0	0	0	0	0	3	0	0	0	0	0	GTGCCAGCAGCCGCGGTAATACGGAGGGTGCGAGCGTTGTCCGGAATCACTGGGCGTAAAGGGCGCGTAGGCGGTCTGCTAAGCGTGTGGTGAAAGCTCGGGGCTCAACCCCGAGTCTGCCATGCGAACTGGTGGACTTGAGCACTGTAGA
f__Rhodocyclaceae, 578882	k__Bacteria, p__Proteobacteria, c__Betaproteobacteria, o__Rhodocyclales, f__Rhodocyclaceae, g__, s__	6	0	0	0	0	0	4	0	0	0	0	0	0	0	0	0	0	2	0	0	0	0	0	0	0	0	0	0	0	0	0	0	0	0	0	0	0	0	0	0	0	0	0	0	0	GCAGCCGCGGTAATACGAAGGGGGCTAGCGTTGTTCGGAATTACTGGGCGTAAAGCGTGCGCAGGCGGTTATATAAGACAGATGTGAAATCCCCGGGCTCAACCTGGGAACTGCATTAGTGACTGTATAGCTGGAGTGCGGCAGAGG
g__Shinella, 578761	k__Bacteria, p__Proteobacteria, c__Alphaproteobacteria, o__Rhizobiales, f__Rhizobiaceae, g__Shinella, s__	23	0	0	0	0	0	22	0	0	0	0	0	1	0	0	0	0	0	0	0	0	0	0	0	0	0	0	0	0	0	0	0	0	0	0	0	0	0	0	0	0	0	0	0	0	GCAGCCGCGGTAATACGAAGGGGGCTAGCGTTGTTCGGAATTACTGGGCGTAAAGCGCACGTAGGCGGACATTTAAGTCAGGGGTGAAATCCCGGGGCTCAACCCCGGAACTGCCTTTGATACTGGGTGTCTGGAGTATGGAAGAGG
s__distasonis, 578016	k__Bacteria, p__Bacteroidetes, c__Bacteroidia, o__Bacteroidales, f__Porphyromonadaceae, g__Parabacteroides, s__distasonis	2	0	0	0	0	0	0	0	0	0	0	0	0	0	0	0	0	0	0	0	0	0	0	0	0	0	0	0	0	0	0	0	0	0	0	0	0	0	0	0	2	0	0	0	0	GTGCCAGCAGCCGCGGTAATACGGAGGATCCGAGCGTTATCCGGATTTATTGGGTTTAAAGGGTGCGTAGGCGGCCTTTTAAGTCAGCGGTGAAAGTCTGTGGCTCAACCATAGAATTGCCGTTGAAACTGGGGGGCTTGAGTATGTTTGA
f__Comamonadaceae, 576928	k__Bacteria, p__Proteobacteria, c__Betaproteobacteria, o__Burkholderiales, f__Comamonadaceae, g__, s__	58	0	0	0	0	0	0	0	0	0	0	0	1	2	1	0	0	23	0	1	0	0	4	2	0	0	0	0	3	0	0	0	0	0	8	0	5	0	0	8	0	0	0	0	0	GTGCCAGCAGCCGCGGTAATACGTAGGGTGCAAGCGTTAATCGGAATTACTGGGCGTAAAGCGTGCGCAGGCGGTTATGCAAGACAGATGTGAAATCCCCGGGCTCAACCTGGGAACTGCATTTGTGACTGCATGGCTAGAGTACGGTAGAG
f__Comamonadaceae, 576785	k__Bacteria, p__Proteobacteria, c__Betaproteobacteria, o__Burkholderiales, f__Comamonadaceae, g__, s__	213	0	0	0	0	1	2	0	0	0	1	1	0	0	4	0	0	48	3	0	5	0	2	46	0	0	6	20	6	11	0	5	9	0	15	0	1	1	1	21	1	1	0	2	0	GTGCCAGCAGCCGCGGTAATACGTAGGGTGCAAGCGTTAATCGGAATTACTGGGCGTAAAGCGTGCGCAGGCGGTTATGTAAGACAGATGTGAAATCCCCGGGCTCAACCTGGGAACTGCATTTGTGACTGCATAGCTAGAGTACGGTAGAG
g__Bacillus, 576641	k__Bacteria, p__Firmicutes, c__Bacilli, o__Bacillales, f__Bacillaceae, g__Bacillus, s__	2	0	0	0	0	0	0	0	0	0	0	0	0	0	0	0	0	0	0	0	0	0	0	0	0	0	0	0	0	0	0	0	0	0	0	0	0	2	0	0	0	0	0	0	0	GTGCCAGCAGCCGCGGTAATACGTAGGTGGCAAGCGTTGTCCGGAATTATTGGGCGTAAAGCGCGCGCAGGCGGTTTCTTAAGTCTGATGTGAAAGCCCCCGGCTCAACCGGGGAGGGTCATTGGAAACTGGGGAACTTGAGTGCAGAAGA
f__Comamonadaceae, 576501	k__Bacteria, p__Proteobacteria, c__Betaproteobacteria, o__Burkholderiales, f__Comamonadaceae, g__, s__	2	0	0	0	0	0	2	0	0	0	0	0	0	0	0	0	0	0	0	0	0	0	0	0	0	0	0	0	0	0	0	0	0	0	0	0	0	0	0	0	0	0	0	0	0	GCAGCCGCGGTAATACGTAGGGTGCGAGCGTTAATCGGAATTACTGGGCGTAAAGCGTGCGCAGGCGGTTATATAAGACAGATGTGAAATCCCCGGGCTCAACCTGGGAACTGCATTAGTGACTGTATAGCTGGAGTGCGGCAGAGG
g__Comamonas, 576010	k__Bacteria, p__Proteobacteria, c__Betaproteobacteria, o__Burkholderiales, f__Comamonadaceae, g__Comamonas, s__	7	0	0	0	0	0	0	0	0	0	0	0	0	0	0	0	0	0	0	0	0	0	0	1	0	0	0	0	2	0	0	0	0	0	2	0	0	0	0	2	0	0	0	0	0	AGCAGCCGCGGTAAATACGTAGGGGTGCAAGCGTTAATCGGAATTACTGGGCGTAAAGCGTGCGCAGGCGGTTTTGTAAGACAGTGGTGAAATCCCCGGGCTCAACCTGGGAACTGCCATTGTGACTGCAAGGCTAGAGTGCGGCAGAGGG
g__Acidovorax, 575562	k__Bacteria, p__Proteobacteria, c__Betaproteobacteria, o__Burkholderiales, f__Comamonadaceae, g__Acidovorax, s__	13935	0	55	1	0	0	83	0	16	0	0	10	3	1	64	0	1	2074	1150	498	437	319	707	1353	102	448	441	190	455	376	64	617	580	201	1294	86	28	158	166	1719	41	22	13	42	120	CGTGCCAGCAGCCGCGGTAATACGTAGGGTGCGAGCGTTAATCGGAATTACTGGGCGTAAAGCGTGCGCAGGCGGTTATATAAGACAGATGTGAAATCCCCGGGCTCAACCTGGGAACTGCATTTGTGACTGTATAGCTAGAGTACGGCAGAG
g__Rubrivivax, 574991	k__Bacteria, p__Proteobacteria, c__Betaproteobacteria, o__Burkholderiales, f__Comamonadaceae, g__Rubrivivax, s__	26	0	0	0	0	0	0	0	0	0	0	0	0	0	0	0	0	0	0	0	0	0	0	0	0	0	0	0	5	0	0	0	0	0	21	0	0	0	0	0	0	0	0	0	0	GTGCCAGCAGCCGCGGTAATACGTAGGGTGCAAGCGTTAATCGGAATTACTGGGCGTAAAGCGTGCGCAGGCGGTTGTGCAAGACAGGTGTGAAATCCCCGGGCTTAACCTGGGAACTGCACTTGTGACTGCACGGCTGGAGTACGGTAGAG
o__Stramenopiles, 574920	k__Bacteria, p__Cyanobacteria, c__Chloroplast, o__Stramenopiles, f__, g__, s__	2	0	0	0	0	0	0	0	0	0	0	0	0	0	0	0	0	0	0	0	0	0	0	0	0	0	0	0	0	0	0	0	0	0	0	0	0	0	0	2	0	0	0	0	0	GTGCCAGCAGCCGCGGTAAGACGGAGGATGCAAGTGTTATCCGGAATCACTGGGCGTAAAGCGTCTGTAGGTGGTCAAATAAGTCAACTGTTAAATCTTGAGGCTCAACCTCAAAATCGCAGTCGAAACTATTAGACTAGAGTATAGTAGG
g__Methylobacterium, 574655	k__Bacteria, p__Proteobacteria, c__Alphaproteobacteria, o__Rhizobiales, f__Methylobacteriaceae, g__Methylobacterium, s__	44	0	0	0	0	0	0	0	0	0	0	0	0	0	10	0	0	0	0	0	0	0	0	3	0	0	0	0	0	0	0	0	0	0	11	9	0	11	0	0	0	0	0	0	0	GTGCCAGCAGCCGCGGTAATACGAAGGGGGCTAGCGTTGCTCGGAATCACTGGGCGTAAAGGGCGCGTAGGCGGCGTTTTAAGTCGGGGGTGAAAGCCTGTGGCTCAACCACAGAATGGCCTTCGATACTGGGACGCTTGAGTATGGTAGAG
g__Enhydrobacter, 574102	k__Bacteria, p__Proteobacteria, c__Gammaproteobacteria, o__Pseudomonadales, f__Moraxellaceae, g__Enhydrobacter, s__	94	0	0	0	0	0	0	0	0	0	0	0	0	0	0	16	0	0	0	0	0	0	0	0	0	0	5	38	0	2	0	0	0	0	0	9	24	0	0	0	0	0	0	0	0	GTGCCAGCAGCCGCGGTAATACAGAGGGTGCGAGCGTTAATCGGAATTACTGGGCGTAAAGCGAGTGTAGGTGGCTCATTAAGTCACATGTGAAATCCCCGGGCTTAACCTGGGAACTGCATGTGATACTGGTGGTGCTAGAATATGTGAGAG
g__Flavobacterium, 574039	k__Bacteria, p__Bacteroidetes, c__Flavobacteriia, o__Flavobacteriales, f__Flavobacteriaceae, g__Flavobacterium, s__	225	0	0	0	0	0	2	0	0	0	0	0	0	0	0	0	0	0	0	0	0	0	0	106	0	0	3	30	4	0	1	0	0	0	0	0	0	0	0	79	0	0	0	0	0	GTGCCAGCAGCCGCGGTAATACGGAGGATCCAAGCGTTATCCGGAATCATTGGGTTTAAAGGGTCCGTAGGCGGTTTAATAAGTCAGTGGTGAAATCTGGTCGCTCAACGATCAAACTGCCATTGATACTGTTAGACTTGAATTACTGTGAA
g__Rhodococcus, 573976	k__Bacteria, p__Actinobacteria, c__Actinobacteria, o__Actinomycetales, f__Nocardiaceae, g__Rhodococcus, s__	1696	144	0	0	0	0	1	30	0	46	0	30	0	23	9	0	0	0	15	44	16	33	39	999	2	0	20	44	52	7	6	6	9	1	7	0	0	5	0	85	11	8	3	1	0	GTGCCAGCAGCCGCGGTAATACGTAGGGTGCAAGCGTTGTCCGGAATTACTGGGCGTAAAGAGTTCGTAGGCGGTTTGTCGCGTCGTTTGTGAAAACCAGCAGCTCAACTGCTGGCTTGCAGGCGATACGGGCAGACTTGAGTACTGCAGGG
f__Rhizobiaceae, 573545	k__Bacteria, p__Proteobacteria, c__Alphaproteobacteria, o__Rhizobiales, f__Rhizobiaceae, g__, s__	5111	0	0	0	0	0	394	29	6	0	0	0	24	0	10	0	3	2191	0	0	65	0	0	827	59	46	67	72	19	38	7	73	77	46	5	15	0	17	9	971	17	2	8	5	9	AGCAGCCGCGGTAATACGAAGGGGGCTAGCGTTGTTCGGAATTACTGGGCGTAAAGCGCACGTAGGCGGGTATTTAAGTCAGGGGTGAAATCCCAGAGCTCAACTCTGGAACTGCCTTTGATACTGGGTACCTAGAGTATGGAAGAGGT
s__azotifigens, 573413	k__Bacteria, p__Proteobacteria, c__Alphaproteobacteria, o__Sphingomonadales, f__Sphingomonadaceae, g__Sphingomonas, s__azotifigens	62	0	0	0	0	0	0	0	0	0	0	0	0	0	0	0	0	0	0	0	0	0	0	8	0	0	2	2	2	0	5	0	0	0	2	0	0	4	0	37	0	0	0	0	0	GTGCCAGCAGCCGCGGTAATACGGAGGGGGCTAGCGTTGTTCGGAATTACTGGGCGTAAAGCGCACGTAGGCGGCTTTGTAAGTCAGAGGTGAAAGCCTGGAGCTCAACTCCAGAACTGCCTTTGAGACTGCATCGCTTGAATCCAGGAGAG
g__Acinetobacter, 573124	k__Bacteria, p__Proteobacteria, c__Gammaproteobacteria, o__Pseudomonadales, f__Moraxellaceae, g__Acinetobacter, s__	15	0	0	0	0	0	0	0	0	0	0	0	0	0	0	0	0	0	0	0	0	0	0	0	0	0	0	0	8	0	0	0	0	0	7	0	0	0	0	0	0	0	0	0	0	GTGCCAGCAGCCGCGGTAATACAGAGGGTGCGAGCGTTAATCGGATTTACTGGGCGTAAAGCGTGCGTAGGCGGCCATTTAAGTCAAATGTGAAATCCCCGAGCTTAACTTGGGAATTGCATTCGATACTGGATGGCTAGAGTATGGGAGA
g__Desulfovibrio, 573061	k__Bacteria, p__Proteobacteria, c__Deltaproteobacteria, o__Desulfovibrionales, f__Desulfovibrionaceae, g__Desulfovibrio, s__	28	4	5	0	0	0	0	0	0	0	1	0	0	4	0	0	2	0	5	0	3	3	1	0	0	0	0	0	0	0	0	0	0	0	0	0	0	0	0	0	0	0	0	0	0	GCAGCCGCGGTAATACGGAGGGTGCAAGCGTTAATCGGAATTACTGGGCGTAAAGCGCACACAGGCGGTTTGTTAAGTCAGATGTGAAATCCCCGGGCTCAACCTGGGAACTGCATCTGATACTGGCAAGCTTGAGTCTCGTAGAGG
g__Fluviicola, 570086	k__Bacteria, p__Bacteroidetes, c__Flavobacteriia, o__Flavobacteriales, f__Cryomorphaceae, g__Fluviicola, s__	1714	0	0	0	0	0	0	0	0	0	0	0	0	0	3	0	0	1	78	103	1139	93	297	0	0	0	0	0	0	0	0	0	0	0	0	0	0	0	0	0	0	0	0	0	0	AGCAGCCGCGGTAATACGGAGGGTGCAAGCGTTATCCGGAATCATTGGGTTTAAAGGGTCCGCAGGCGGTCTTATAAGTCAGTGGTGAAAGCCTACAGCTCAACTGTAGAACTGCCATTGATACTGTAAGACTTGAATTCGATCGAAGT
f__Pirellulaceae, 569691	k__Bacteria, p__Planctomycetes, c__Planctomycetia, o__Pirellulales, f__Pirellulaceae, g__, s__	17	0	0	0	0	0	0	0	0	0	0	0	0	0	0	0	0	0	0	0	0	0	0	0	0	0	3	0	0	0	0	0	0	0	0	0	0	0	14	0	0	0	0	0	0	GTGCCAGCAGCCGCGGTAAGACGAACCGTACGAACGTTATTCGGAATCACTGGGCTTAAAGGGTGCGTAGGCGGCGCGGAAAGTTGGGTGTGAAAGCCCTCGGCTCAACCGAGGAATTGCGCCCAATACTACCGTGCTTGAGTGAGATAGA
s__mexicana, 569456	k__Bacteria, p__Proteobacteria, c__Gammaproteobacteria, o__Xanthomonadales, f__Xanthomonadaceae, g__Pseudoxanthomonas, s__mexicana	6	0	0	0	0	0	0	0	0	0	0	0	0	0	0	0	0	0	0	0	0	0	0	6	0	0	0	0	0	0	0	0	0	0	0	0	0	0	0	0	0	0	0	0	0	GTGCCAGCAGCCGCGGTAATACGAAGGGTGCAAGCGTTACTCGGAATTACTGGGCGTAAAGCGTGCGTAGGTGGTGGTTTAAGTCTGCTGTGAAAGCCCTGGGCTCAACCTGGGAATTGCAGTGGATACTGGATCACTAGAGTGTGGTAGA
f__Pseudomonadaceae, 568727	k__Bacteria, p__Proteobacteria, c__Gammaproteobacteria, o__Pseudomonadales, f__Pseudomonadaceae, g__, s__	3	0	0	0	0	0	0	0	0	0	0	0	0	0	0	0	0	0	0	0	0	0	0	0	0	3	0	0	0	0	0	0	0	0	0	0	0	0	0	0	0	0	0	0	0	GTGCCAGCAGCCGCGGTAATACGAAGGGTGCGAGCGTTAATCGGAATTACTGGGCGTAAAGCGCGCGTAGGCGGTTTGTTAAGTTGGAGGTGAAATCCCCGGGCTCAACCTGGGAAGTGCCTCCAAAACTGGCTGACTAGAGTACGGTAGA
f__Bradyrhizobiaceae, 567776	k__Bacteria, p__Proteobacteria, c__Alphaproteobacteria, o__Rhizobiales, f__Bradyrhizobiaceae, g__, s__	45	0	0	0	0	0	0	0	0	0	0	0	0	0	0	0	0	1	0	0	0	0	35	0	0	6	0	0	0	0	0	0	0	0	1	0	0	0	0	1	0	0	0	1	0	AGCAGCCGCGGTAATACGAAGGGGGCTAGCGTTGCTCGGAATCACTGGGCGTAAAGGGCGCGTAGGCGGCCGTTCAAGTCGGGGGTGAAAGCCTGTGGCTCAACCACAGAATTGCCTTCGATACTGGATGGCTCGAGACCGGAAGAGG
s__acidicola, 567725	k__Bacteria, p__Firmicutes, c__Bacilli, o__Bacillales, f__Bacillaceae, g__Bacillus, s__acidicola	22	0	10	0	0	0	0	0	0	0	0	0	0	0	0	0	0	0	0	0	0	0	0	0	12	0	0	0	0	0	0	0	0	0	0	0	0	0	0	0	0	0	0	0	0	GTGCCAGCAGCCGCGGTAATACGTAGGTGGCAAGCGTTGTCCGGAATTATTGGGCGTAAAGCGCGCGCAGGCGGTTTCTTAAGTCTGATGTGAAAGCCCACGGCTCAACCGTGGAGGGTCATTGGAAACTGGGAGACTTGAGTGCAGAAGAG
o__Rhizobiales, 567336	k__Bacteria, p__Proteobacteria, c__Alphaproteobacteria, o__Rhizobiales, f__, g__, s__	4	0	0	0	0	0	0	0	0	0	0	0	0	0	2	0	1	1	0	0	0	0	0	0	0	0	0	0	0	0	0	0	0	0	0	0	0	0	0	0	0	0	0	0	0	GCCAGCCGCGGGAATACGAAGGGGGCTAGCGTTGCTCGGAATCACTGGGCGTAAAGGGCGCGTAGGCGGACTCTTAAGTCGGGGGTGAAAGCCCAGGGCTCAACCCTGGAATTGCCTTCGATACTGAGAGTCTTGAGTTCGGAAGAGG
o__Rickettsiales, 566774	k__Bacteria, p__Proteobacteria, c__Alphaproteobacteria, o__Rickettsiales, f__, g__, s__	1333	0	0	0	0	0	0	0	0	0	0	0	0	0	0	0	0	0	0	0	0	0	0	88	58	92	110	118	38	132	9	213	172	72	9	53	14	63	26	3	32	1	1	3	26	CGTGCCAGCAGCCGCGGTAATACGAAGGGAGCTAGCGTTGTTCGGAATTACTGGGCGTAAAGGGCGCGTAGGCGGCTCTGTAAGTCAGATGTGAAAGCCCCGGGCTTAACCTGGGAACTGCATTTGATACTGCAGAGCTAGAGAATGTGAGAGG
f__Oxalobacteraceae, 566578	k__Bacteria, p__Proteobacteria, c__Betaproteobacteria, o__Burkholderiales, f__Oxalobacteraceae, g__, s__	17	0	0	0	0	0	0	0	0	0	0	0	0	0	0	0	0	0	0	0	0	0	0	0	0	0	0	0	10	0	0	0	0	0	7	0	0	0	0	0	0	0	0	0	0	GTGCCAGCAGCCGCGGTAATACGTAGGGTGCAAGCGTTAATCGGAATTACTGGGCGTAAAGCGTGCGCAGGCGGTTGTGCAAGACAGATGTGAAATCCCCGGGCTCAACCTGGGAATTGCATTTGTGACTGCACGGCTAGAGTGTGTCAGA
f__Hyphomicrobiaceae, 566327	k__Bacteria, p__Proteobacteria, c__Alphaproteobacteria, o__Rhizobiales, f__Hyphomicrobiaceae, g__, s__	11	0	0	0	0	0	0	0	0	0	0	0	0	0	0	0	0	0	0	0	0	0	0	0	0	0	0	0	0	0	0	0	0	0	2	0	0	0	9	0	0	0	0	0	0	GTGCCAGCAGCCGCGGTAATACGAAGGGGACTAGCGTTGTTCGGAATCACTGGGCGTAAAGCGCACGTAGGCGGAATTGTAAGTCAGGGGTGAAATCCCGGGGCTCAACCTCGGAACTGCCTTTGATACTGCGATTCTCGAGTCCGATAGA
f__Enterobacteriaceae, 566243	k__Bacteria, p__Proteobacteria, c__Gammaproteobacteria, o__Enterobacteriales, f__Enterobacteriaceae, g__, s__	11	1	0	1	2	0	0	0	0	0	0	0	0	0	0	1	2	0	1	0	1	1	1	0	0	0	0	0	0	0	0	0	0	0	0	0	0	0	0	0	0	0	0	0	0	GCAGCCGCGGTAATACGGAGGGTGCAAGCGTTAATCGGAATTACTGGGCGTAAAGCACACGCAGGCGGTTTGTTAAGTCAGATGTGAAATCCCCGGGCTCAACCTGGGAACTGCATCTGATACTGGCAAGCTTGAGTCTCGTAGAGGG
g__Burkholderia, 565936	k__Bacteria, p__Proteobacteria, c__Betaproteobacteria, o__Burkholderiales, f__Burkholderiaceae, g__Burkholderia, s__	1344	74	122	0	30	19	0	48	36	200	20	44	0	9	10	0	20	1	0	8	79	84	310	0	99	0	13	42	0	1	3	2	0	4	0	31	8	6	12	0	8	1	0	0	0	AGCAGCCGCGGTAATACGTAGGGTGCGAGCGTTAATCGGAATTACTGGGCGTAAAGCGTGCGCAGGCGGTTTGCTAAGACCGATGTGAAATCCCCGGGCTCAACCTGGGAACTGCATTGGTGACTGGCAGGCTAGAGTATGGCAGAGGG
f__Caulobacteraceae, 565413	k__Bacteria, p__Proteobacteria, c__Alphaproteobacteria, o__Caulobacterales, f__Caulobacteraceae, g__, s__	32	0	0	0	0	0	2	0	0	0	0	0	0	0	0	0	0	0	0	0	0	0	0	0	6	0	0	8	0	0	3	1	2	4	0	2	0	0	3	0	0	0	0	0	1	GTGCCAGCAGCCGCGGTAATACGAAGGGGGCTAGCGTTGCTCGGAATTACTGGGCGTAAAGGGCGCGTAGGCGGATAGTTTAGTCAGAGGTGAAAGCCCAGGGCTCAACCTTGGAATTGCCTTTGATACTGGCTGTCTTGAGTACGGGAGAG
g__Pseudomonas, 564991	k__Bacteria, p__Proteobacteria, c__Gammaproteobacteria, o__Pseudomonadales, f__Pseudomonadaceae, g__Pseudomonas, s__	36	0	0	0	0	0	0	0	0	0	0	0	0	0	0	0	0	0	0	0	0	0	0	0	2	1	9	0	1	2	0	11	6	0	0	0	0	0	1	0	0	0	0	0	3	GTGCCAGCAGCCGCGGTAATACAGAGGGTGCAAGCGTTAATCGGAATTACTGGGCGTAAAGCGCGCGTAGGTGGTTCGTTAAGTTGGATGTGAAAGCCCCGGGCTCAACCTGGGAACTGCATCCAAACTGGCGAGCTAGAGTATGGTAAAG
g__Pedobacter, 564487	k__Bacteria, p__Bacteroidetes, c__Sphingobacteriia, o__Sphingobacteriales, f__Sphingobacteriaceae, g__Pedobacter, s__	38	0	0	0	0	0	0	0	0	0	0	0	0	0	0	0	0	0	0	0	0	0	0	0	1	10	3	2	0	2	1	4	3	1	0	3	0	1	0	5	1	0	0	0	1	GTGCCAGCAGCCGCGGTAATACGGAGGATCCAAGCGTTATCCGGATTTATTGGGTTTAAAGGGTGCGTAGGCGGCCTGTTAAGTCAGAGGTGAAAGACGGTAGCTCAACTATCGCAGTGCCTTTGATACTGATGGGCTTGAATGAACTAGAG
g__Polynucleobacter, 564411	k__Bacteria, p__Proteobacteria, c__Betaproteobacteria, o__Burkholderiales, f__Oxalobacteraceae, g__Polynucleobacter, s__	12	0	0	0	0	0	0	0	0	0	0	0	8	0	0	0	0	0	0	0	0	0	0	0	0	0	0	0	0	0	4	0	0	0	0	0	0	0	0	0	0	0	0	0	0	AGCAGCCGCGGTAATACGTAGGGTGCGAGCGTTAATCGGAATTACTGGGCGTAAAGCGTGCGCAGGCGGTTATACAAGACAGGCGTGAAATCCCCGGGCTTAACCTGGGAATGGCGCCTGTGACTGTATAGCTAGAGTGTGTCAGAGG
f__Rhodospirillaceae, 564004	k__Bacteria, p__Proteobacteria, c__Alphaproteobacteria, o__Rhodospirillales, f__Rhodospirillaceae, g__, s__	2	0	0	0	0	0	0	0	0	0	0	0	0	0	0	0	0	0	0	0	0	0	0	0	0	0	0	0	0	0	0	0	0	0	0	0	0	0	2	0	0	0	0	0	0	GTGCCAGCAGCCGCGGTAAGACGAAGGGGGCTAGCGTTGTTCGGAATTACTGGGCGTAAAGCGCGTGTAGGCGGTTATCCAAGTTGGGTGTGAAAGCCTTGAGCTCAACTCAAGAAATGCACTCAGTACTGGGTGACTAGAGGACCGGAGA
f__Halomonadaceae, 563536	k__Bacteria, p__Proteobacteria, c__Gammaproteobacteria, o__Oceanospirillales, f__Halomonadaceae, g__, s__	714	0	70	80	116	0	0	25	1	77	0	7	0	12	16	4	100	0	40	35	0	43	53	0	0	14	0	9	0	0	0	0	0	0	0	0	11	0	0	0	0	0	0	0	1	AGCAGCCGCGGTAATACGGAGGGTGCGAGCGTTAATCGGAATTACTGGGCGTAAAGCGCGCGTAGGTGGCTTGATAAGCCGGTTGTGAAAGCCCCGGGCTCAACCTGGGAACGGCATCCGGAACTGTCAGGCTAGAGTGCAGGAGAGGA
g__Luteolibacter, 562639	k__Bacteria, p__Verrucomicrobia, c__Verrucomicrobiae, o__Verrucomicrobiales, f__Verrucomicrobiaceae, g__Luteolibacter, s__	3159	0	0	0	0	1	0	1	6	0	0	0	0	0	0	0	1	234	676	244	829	447	720	0	0	0	0	0	0	0	0	0	0	0	0	0	0	0	0	0	0	0	0	0	0	AGCAGCCGCGGTAATACGAAGGTCCCGAGCGTTGTTCGGAATCACTGGGCGTAAAGGGAGCGTAGGCGGCGTGGTAAGTCAGACGTGAAATCCCGGGGCTCAACCCCGGAACTGCGTCCGATACTGCCGCGCTCAGAGGATTGGAGAGG
g__Pedobacter, 562141	k__Bacteria, p__Bacteroidetes, c__Sphingobacteriia, o__Sphingobacteriales, f__Sphingobacteriaceae, g__Pedobacter, s__	9303	0	3	0	0	0	232	0	0	0	0	0	2	1	0	0	0	1	0	1	0	0	0	251	166	744	922	461	415	978	112	1708	1283	357	128	232	121	487	302	13	46	18	11	8	300	CGTGCCAGCAGCCGCGGTAATACGGAGGATCCAAGCGTTATCCGGATTTATTGGGTTTAAAGGGTGCGTAGGCGGCCTGTTAAGTCAGGGGTGAAAGACGGTGGCTCAACCATCGCAGTGCCCTTGATACTGATGGGCTTGAATACACTAGAG
f__Xanthomonadaceae, 561970	k__Bacteria, p__Proteobacteria, c__Gammaproteobacteria, o__Xanthomonadales, f__Xanthomonadaceae, g__, s__	44	0	0	0	0	0	0	0	0	0	0	0	0	0	0	0	0	0	0	0	0	0	0	0	0	10	0	7	2	0	0	0	0	17	6	0	0	0	0	1	0	1	0	0	0	GTGCCAGCAGCCGCGGTAATACGAAGGGTGCAAGCGTTACTCGGAATTACTGGGCGTAAAGCGTGAGTAGGTGGTTTCTTAAGTCTGCTGTGAAAGCCCCGGGCTCAACTTGGGATTTGCAGTGGATACTGGGGAGCTAGAGTGCGGTAGAG
g__Pseudomonas, 561294	k__Bacteria, p__Proteobacteria, c__Gammaproteobacteria, o__Pseudomonadales, f__Pseudomonadaceae, g__Pseudomonas, s__	2	0	0	0	0	0	0	0	0	0	0	0	0	0	0	0	0	0	0	0	0	2	0	0	0	0	0	0	0	0	0	0	0	0	0	0	0	0	0	0	0	0	0	0	0	GTGCCAGCAGCCGCGGTAATACAGAGGGTGCAAGCGTTAATCGGAATTACTGGGCGTAAAGCGCGCGTAGGTGGTTTGTTAAGTTGGATGTGAAAGCCCCGGGCTCAACCTGGGAACTGCATCCAAAACTGGCAAGCTAGAGTATGGAGAG
c__Mollicutes, 560685	k__Bacteria, p__Tenericutes, c__Mollicutes, o__, f__, g__, s__	3	0	0	0	0	0	0	0	0	0	0	0	0	0	0	0	0	0	0	0	0	0	0	1	0	0	0	0	0	0	0	0	0	0	2	0	0	0	0	0	0	0	0	0	0	CGTGCCAGCAGCCGCGGTAATACGGAGGGTGCAAGCGTTAATCGGAATTACTGGGCGTAAAGCGCACGCAGGCGGTTTGTTAAGTCAGATGTGAAATCCCCGAGCTCAACTTGGGAACTGCATTTGAAACTGGCAAGCTAGAGTCTTGTAGAG
s__shigelloides, 558970	k__Bacteria, p__Proteobacteria, c__Gammaproteobacteria, o__Enterobacteriales, f__Enterobacteriaceae, g__Plesiomonas, s__shigelloides	2	0	0	0	0	0	0	0	0	0	0	0	0	0	0	0	0	0	0	0	0	0	0	0	0	0	0	0	2	0	0	0	0	0	0	0	0	0	0	0	0	0	0	0	0	GTGCCAGCAGCCGCGGTAATACGGAGGGTGCAAGCGCTAATCGGAATTACTGGGCGTAAAGCGCACGCAGGCGGTTTGTTAAGTCAGATGTGAAATCCCCGAGCTCAACTTGGGAACTGCATTTGAAACTGGCAAGCTAGAGTCTTGTAGA
o__Rickettsiales, 558742	k__Bacteria, p__Proteobacteria, c__Alphaproteobacteria, o__Rickettsiales, f__, g__, s__	774	0	0	0	0	0	0	0	0	0	0	0	0	0	0	0	0	0	0	0	0	0	0	657	0	0	0	11	0	0	0	0	0	0	1	0	0	0	0	101	0	0	0	3	1	GTGCCAGCAGCCGCGGTAATACGAAGGGTGCTAGCGTTGTTCGGAATGACTGGGCGTAAAGGGAGCGTAGGCGGTTGAGTACGTTTGGTGTGAAAGTCCTGGGCTTAACCTGGGGACTGCATTGAATACGGCTTGACTTGAGGTATAGAGGG
g__Serratia, 558281	k__Bacteria, p__Proteobacteria, c__Gammaproteobacteria, o__Enterobacteriales, f__Enterobacteriaceae, g__Serratia, s__	23	8	1	3	0	0	0	3	0	0	0	2	0	0	0	1	4	0	1	0	0	0	0	0	0	0	0	0	0	0	0	0	0	0	0	0	0	0	0	0	0	0	0	0	0	GTGCCAGCAGCCGCGGTAATACGGAGGGTGCAAGCGTTAATCGGAATTACTGGGCGTAAAGCGCACGCAGGCGGTTTGTTAAGTCAGATGTGAAGTCCCCGGGCTCAACCTGGGAACTGCATTTGAAACTGGCAAGCTTGAGTCTCGTAGAG
g__Achromobacter, 558264	k__Bacteria, p__Proteobacteria, c__Betaproteobacteria, o__Burkholderiales, f__Alcaligenaceae, g__Achromobacter, s__	341	0	0	1	0	0	183	0	0	0	0	0	4	0	0	0	0	2	0	0	0	1	0	9	18	20	30	0	0	0	6	21	33	5	8	0	0	0	0	0	0	0	0	0	0	AGCAGCCGCGGTAATACGTAGGGTGCAAGCGTTAATCGGAATTACTGGGCGTAAAGCGTGCGCAGGCGGTTCGGAAAGAAAGATGTGAAATCCCAGAGCTTAACTTTGGAACTGCATTTTTAACTACCGGGCTAGAGTGTGTCAGAGGG
g__Rubrivivax, 557756	k__Bacteria, p__Proteobacteria, c__Betaproteobacteria, o__Burkholderiales, f__Comamonadaceae, g__Rubrivivax, s__	95	0	0	0	0	0	87	0	0	0	0	0	0	0	0	0	0	0	0	0	0	0	0	0	0	7	0	0	0	0	0	0	0	0	1	0	0	0	0	0	0	0	0	0	0	AGCAGCCGCGGTAATACGTAGGGTGCAAGCGTTAATCGGAATTACTGGGCGTAAAGCGTGCGCAGGCGGTCTTGCAAGACAGATGTGAAATCCCCGGGCTTAACCTGGGAACTGCATTTGTGACTGCAAGGCTGGAGTGCGGCAGAGGG
f__Aurantimonadaceae, 557145	k__Bacteria, p__Proteobacteria, c__Alphaproteobacteria, o__Rhizobiales, f__Aurantimonadaceae, g__, s__	30	0	0	0	0	0	0	0	0	0	0	0	0	0	0	0	0	0	0	0	0	0	0	0	11	5	0	10	0	0	0	0	0	0	4	0	0	0	0	0	0	0	0	0	0	GTGCCAGCAGCCGCGGTAATACGAAGGGGGCTAGCGTTGTTCGGAATTACTGGGCGTAAAGCGCACGTAGGCGGACATTTAAGTCAGGGGTGAAATCCCGGGGCTCAACCCCGGAACTGCCTTTGATACTGGGTGTCTTGAGTGTGGTAGA
g__Flavobacterium, 556232	k__Bacteria, p__Bacteroidetes, c__Flavobacteriia, o__Flavobacteriales, f__Flavobacteriaceae, g__Flavobacterium, s__	6276	0	0	0	0	0	0	0	0	0	0	0	0	0	0	0	0	0	0	0	0	0	0	2021	4	2	14	19	861	1	2	0	0	1	132	0	0	3	0	3201	0	6	8	0	1	CGTGCCAGCAGCCGCGGTAATACGGAGGATGCGAGCGTTATCCGGAATCATTGGGTTTAAAGGGTCCGTAGGCGGTTTAATAAGTCAGTGGTGAAATCTGGTCGCTCAACGATCAAACTGCCATTGATACTGTTAACTTGAATAATTGTGAA
g__Bdellovibrio, 556100	k__Bacteria, p__Proteobacteria, c__Deltaproteobacteria, o__Bdellovibrionales, f__Bdellovibrionaceae, g__Bdellovibrio, s__	9	0	0	0	0	0	2	0	0	0	0	0	0	0	0	0	0	7	0	0	0	0	0	0	0	0	0	0	0	0	0	0	0	0	0	0	0	0	0	0	0	0	0	0	0	GCAGCCGCGGTAAGACGAGGGATCCTAGCGTTGTTCGGAATTATTGGGCGTAAAGCGGGTGTAGGTGGACTTATAAGTCAGGTGTGAAATCCCAGGGCTCAACCCTGGAAGTGCACTTGATACTGCAAGTCTTGAGTGTGGTAGAGG
f__Rhodobacteraceae, 555568	k__Bacteria, p__Proteobacteria, c__Alphaproteobacteria, o__Rhodobacterales, f__Rhodobacteraceae, g__, s__	4	0	0	0	0	0	2	0	0	0	0	0	0	0	0	0	0	2	0	0	0	0	0	0	0	0	0	0	0	0	0	0	0	0	0	0	0	0	0	0	0	0	0	0	0	GCAGCCGCGGTAATACGGAGGGGGCTAGCGTTGTTCGGAATTACTGGGCGTAAAGCGCACGTAGGCGGACTGGAAAGTTGGGGGTGAAATCCCGGGGCTCAACCTCGGAACTGCCTTCAAAACTCCCAGTCTGGAGTTCGAGAGAGG
g__Mycobacterium, 555495	k__Bacteria, p__Actinobacteria, c__Actinobacteria, o__Actinomycetales, f__Mycobacteriaceae, g__Mycobacterium, s__	5227	73	0	1	0	41	4958	58	2	0	0	0	25	0	0	0	0	4	0	0	27	12	0	10	7	0	7	0	0	0	0	0	0	0	0	0	0	0	0	0	0	0	0	0	2	AGCAGCCGCGGTAATACGTAGGGTGCGAGCGTTGTCCGGAATTACTGGGCGTAAAGAGCTCGTAGGTGGTTTGTCGCGTTGTTCGTGAAAACTCACAGCTTAACTGTGGGCGTGCGGGCGATACGGGCAGACTAGAGTACTGCAGGGGA
g__Photobacterium, 554346	k__Bacteria, p__Proteobacteria, c__Gammaproteobacteria, o__Vibrionales, f__Vibrionaceae, g__Photobacterium, s__	3	0	0	0	0	0	0	0	0	0	0	0	0	0	0	0	0	0	0	0	0	0	0	0	0	0	0	0	0	0	0	0	0	0	0	0	0	3	0	0	0	0	0	0	0	GTGCCAGCAGCCGCGGTAATACGGAGGGTGCGAGCGTTAATCGGAATTACTGGGCGTAAAGCGCATGCAGGCGGTCTGTTAAGCAAGATGTGAAAGCCCGGGGCTCAACCTCGGAACAGCATTTTGAACTGGCAGACTAGAGTCTTGTAGA
g__Agrobacterium, 554002	k__Bacteria, p__Proteobacteria, c__Alphaproteobacteria, o__Rhizobiales, f__Rhizobiaceae, g__Agrobacterium, s__	916	0	0	0	0	0	0	0	0	0	0	0	0	0	0	0	0	0	0	0	0	0	0	778	7	0	0	1	12	0	0	1	0	0	0	0	0	0	0	117	0	0	0	0	0	GTGCCAGCAGCCGCGGTAATACGAAGGGGGCTAGCGTTGTTCGGAATTACTGGGCGTAAAGCGCACGTAGGCGGATATTTAAGTCAGGGGTGAAATCCCGGGGCTCAACCCCGGAACTGCCTTTGATACTGGGTATCTGGAGTATGGAAGAG
s__selenatarsenatis, 553653	k__Bacteria, p__Firmicutes, c__Bacilli, o__Bacillales, f__Bacillaceae, g__Bacillus, s__selenatarsenatis	36	0	0	0	0	0	0	0	0	0	0	0	0	0	0	0	0	0	0	0	0	0	0	0	0	0	0	0	0	0	0	0	0	0	0	0	0	36	0	0	0	0	0	0	0	GTGCCAGCAGCCGCGGTAATACGTAGGTGGCAAGCGTTGTCCGGAATTATTGGGCGTAAAGCGCGCGCAGGCGGTTCCTTAAGTCTGATGTGAAAGCCCCCGGCTCAACCGGGGAGGGTCATTGGAAACTGGGGAACTTGAGTGCAGAAGA
o__Rickettsiales, 553501	k__Bacteria, p__Proteobacteria, c__Alphaproteobacteria, o__Rickettsiales, f__, g__, s__	235	0	0	0	1	0	205	0	0	0	0	23	2	0	1	0	0	1	0	1	0	1	0	0	0	0	0	0	0	0	0	0	0	0	0	0	0	0	0	0	0	0	0	0	0	AGCAGCCGCGGTAATACAGAGAGGGCAAGCGTTGTCCGGAATGACTGGGCGTAAAGCGCGCGCAGGCGGTCTTTTAAGTTGGGTGTGAAATCCCCGGGCTCAACCTGGGAACTGCATTCGATACTGGAAGACTAGAGGCCGAGAGAGGA
f__Enterobacteriaceae, 553208	k__Bacteria, p__Proteobacteria, c__Gammaproteobacteria, o__Enterobacteriales, f__Enterobacteriaceae, g__, s__	13	3	2	0	1	0	0	0	0	2	0	0	0	0	0	0	0	0	3	1	0	1	0	0	0	0	0	0	0	0	0	0	0	0	0	0	0	0	0	0	0	0	0	0	0	GCAGCCGCGGTAATACGGAGGGTGCAAGCGTTAATCGGAATTACTGGGCGTAAAGCGCACGCAGGCGGTCTGTTAAGTCAGATGTGAAATCCCCGGGCTCAACCTGGGAACTGCATCTGATACTGGCAGGCTTGAGTCTCGTAGAGG
o__Actinomycetales, 552685	k__Bacteria, p__Actinobacteria, c__Actinobacteria, o__Actinomycetales, f__, g__, s__	141	0	0	0	0	0	66	0	0	0	0	0	0	0	0	0	0	75	0	0	0	0	0	0	0	0	0	0	0	0	0	0	0	0	0	0	0	0	0	0	0	0	0	0	0	AGCAGCCGCGGTAATACGTAGGGTGCAAGCGTTGTCCGGATTTATTGGGCGTAAAGAGCTCGTAGGCGGTTAGTCACGTCGGATGTGAAAACCCGGAGCTTAACTCCGGGCCTGCATTCGATACGGGCTGACTAGAGTGTTGTAGGGGA
g__Kaistia, 551756	k__Bacteria, p__Proteobacteria, c__Alphaproteobacteria, o__Rhizobiales, f__Rhizobiaceae, g__Kaistia, s__	33	0	0	0	0	0	23	0	0	0	0	0	4	0	0	0	0	6	0	0	0	0	0	0	0	0	0	0	0	0	0	0	0	0	0	0	0	0	0	0	0	0	0	0	0	GCAGCCGCGGTAATACGAAGGGGGCAAGCGTTGTTCGGATTTACTGGGCGTAAAGCGTACGTAGGCGGATGATTAAGTCAGGGGTGAAATCCCGGGGCTCAACCTCGGAACTGCCTTTGATACTGGTCGTCTTGAGTCCGGGAGAGG
g__Rhodobacter, 549666	k__Bacteria, p__Proteobacteria, c__Alphaproteobacteria, o__Rhodobacterales, f__Rhodobacteraceae, g__Rhodobacter, s__	63	0	0	0	0	0	30	0	1	0	0	0	3	0	0	0	0	24	0	0	0	0	0	3	0	0	0	0	0	0	0	0	0	0	0	0	0	0	0	2	0	0	0	0	0	AGCAGCCGCGGTAATACGGAGGGGGCTAGCGTTGTTCGGAATTACTGGGCGTAAAGCGCACGTAGGCGGATCAGAAAGTCAGAGGTGAAATCCCAGGGCTCAACCTTGGAACTGCCTTTGAAACTCCTGATCTTGAGGTCGAGAGAGG
g__Flavobacterium, 548887	k__Bacteria, p__Bacteroidetes, c__Flavobacteriia, o__Flavobacteriales, f__Flavobacteriaceae, g__Flavobacterium, s__	3067	0	0	0	0	0	0	0	0	0	0	0	0	0	0	0	0	0	0	0	0	0	0	0	0	0	0	0	2611	0	1	8	2	1	437	0	0	1	1	5	0	0	0	0	0	CGTGCCAGCAGCCGCGGTAATACGGAGGATCCAAGCGTTATCCGGAATCATTGGGTTTAAAGGGTCCGTAGGCGGTTTGGTAAGTCAGTGGTGAAAGCCCATCGCTCAACGGTGGAACGGCCATTGATACTGCCAGACTTGAATTATTAGGAA
f__Comamonadaceae, 547824	k__Bacteria, p__Proteobacteria, c__Betaproteobacteria, o__Burkholderiales, f__Comamonadaceae, g__, s__	14	0	0	0	0	0	0	0	0	0	0	1	0	0	0	1	0	3	6	0	2	1	0	0	0	0	0	0	0	0	0	0	0	0	0	0	0	0	0	0	0	0	0	0	0	GCAGCCGCGGTAATACGTAGGGTGCGGGCGTTAATCGGAATTACTGGGCGTAAAGCGTGCGCAGGCGGTTATGTAAGACAGATGTGAAATCCCCGGGCTCAACCTGGGAACTGCATTTGTGACTGCATAGCTAGAGTACGGCAGAGG
g__Methylibium, 547327	k__Bacteria, p__Proteobacteria, c__Betaproteobacteria, o__Burkholderiales, f__Comamonadaceae, g__Methylibium, s__	2	0	0	0	0	0	0	0	0	0	0	0	0	0	0	0	0	2	0	0	0	0	0	0	0	0	0	0	0	0	0	0	0	0	0	0	0	0	0	0	0	0	0	0	0	GCAGCCGCGGTAATACGTAGGGTGCGAGCGTTAATCGGAATTACTGGGCGTAAAGCGTGCGCAGGCGGCTTTGCAAGACAGATGTGAAATCCCCGGGCTCAACCTGGGAACTGCATTTGTGACTGCGAGGCTGGAGTGCGGCAGAGG
g__Mesorhizobium, 547097	k__Bacteria, p__Proteobacteria, c__Alphaproteobacteria, o__Rhizobiales, f__Phyllobacteriaceae, g__Mesorhizobium, s__	107	0	0	0	0	0	1	0	0	0	0	0	0	0	0	0	0	0	0	0	0	0	0	89	0	0	0	0	1	0	0	0	0	0	1	0	0	0	0	15	0	0	0	0	0	GTGCCAGCAGCCGCGGTAATACGAAGGGGGCTAGCGTTGTTCGGAATTACTGGGCGTAAAGCGCACGTAGGCGGACTATTAAGTCAGGGGTGAAATCCCGGGGCTCAACCCCGGAACTGCCTTTGATACTGGTAGTCTCGAGTCCGGAAGAG
g__Mycetocola, 546764	k__Bacteria, p__Actinobacteria, c__Actinobacteria, o__Actinomycetales, f__Microbacteriaceae, g__Mycetocola, s__	4	0	0	0	0	0	4	0	0	0	0	0	0	0	0	0	0	0	0	0	0	0	0	0	0	0	0	0	0	0	0	0	0	0	0	0	0	0	0	0	0	0	0	0	0	GCAGCCGCGGTAATACGTAGGGTGCGAGCGTTGTCCGGAATTATTGGGCGTAAAGAGCTCGTAGGCGGTTTGTCGCGTCTGCTGTGAAATCCCGAGGCTCAACCTCGGGCCTGCAGTGGGTACGGGCAGACTAGAGTGCGGTAGGGG
g__Azospirillum, 546390	k__Bacteria, p__Proteobacteria, c__Alphaproteobacteria, o__Rhodospirillales, f__Rhodospirillaceae, g__Azospirillum, s__	30	0	0	0	0	0	0	0	0	0	0	0	0	0	0	0	0	0	0	0	0	0	0	2	0	0	0	0	15	0	3	3	0	0	0	0	0	0	0	0	0	3	1	0	3	GTGCCAGCAGCCGCGGTAATACGAAGGGGGCTAGCGTTGTTCGGAATTACTGGGCGTAAAGGGCGCGTAGGCGGCCTGTTTAGTCAGAAGTGAAAGCCCCGGGCTCAACCTGGGAATAGCTTTTGATACTGGCAGGCTTGAGTTCCGGAGA
g__Pseudomonas, 546144	k__Bacteria, p__Proteobacteria, c__Gammaproteobacteria, o__Pseudomonadales, f__Pseudomonadaceae, g__Pseudomonas, s__	7	0	0	0	0	0	0	0	0	0	0	0	0	0	0	0	0	0	0	0	0	0	0	0	0	0	0	0	0	0	0	0	0	0	4	0	0	0	3	0	0	0	0	0	0	GTGCCAGCAGCCGCGGTAATACAGAGGGTGCAAGCGTTAATCGGAATTACTGGGCGTAAAGCGCGCGTAGGTGGTTTGTTAAGTTGGATGTGAAATCCCCGGGCTCAACCTGGGAACTGCATTCAAAACTGACTGACTAGAGTATGGTAGA
f__Comamonadaceae, 545997	k__Bacteria, p__Proteobacteria, c__Betaproteobacteria, o__Burkholderiales, f__Comamonadaceae, g__, s__	585	0	1	0	0	0	568	0	0	0	0	0	2	0	0	0	0	14	0	0	0	0	0	0	0	0	0	0	0	0	0	0	0	0	0	0	0	0	0	0	0	0	0	0	0	AGCAGCCGCGGTAATACGTAGGGTGCAAGCGTTAATCGGAATTACTGGGCGTAAAGCGTGCGCAGGCGGTTATGCAAGACAGATGTGAAATCCCCGGGCTCAACCTGGGAACTGCATTTGTGACTGCATAGCTGGAGTGCGGCAGAGGG
o__Rhizobiales, 545515	k__Bacteria, p__Proteobacteria, c__Alphaproteobacteria, o__Rhizobiales, f__, g__, s__	2	0	0	0	0	0	1	0	0	0	0	0	1	0	0	0	0	0	0	0	0	0	0	0	0	0	0	0	0	0	0	0	0	0	0	0	0	0	0	0	0	0	0	0	0	GCAGCCGCGGTAATACGAAGGGGGCTAGCGTTGTTCGGAATTACTGGGCGTAAAGCGCACGTAGGCGGATTGTTAAGTGAGGGGTGAAATCCCAGGGCTCAACCCTGGAACTGCCTTTCATACTGGCAATCTCGAGTCCGAGAGAGG
f__Comamonadaceae, 545507	k__Bacteria, p__Proteobacteria, c__Betaproteobacteria, o__Burkholderiales, f__Comamonadaceae, g__, s__	3	0	0	0	0	0	3	0	0	0	0	0	0	0	0	0	0	0	0	0	0	0	0	0	0	0	0	0	0	0	0	0	0	0	0	0	0	0	0	0	0	0	0	0	0	GCAGCCGCGGTAATACGTAGGGTGCAAGCGTTAATCGGAATTACTGGGCGTAAAGCGTGCGCAGGCGGTTATGTAAGACAGAGGTGAAATCCCCGGGCTCAACCTGGGAACTGCCTTTGTGACTGCAAAGCTGGAGTACGGCAGAGG
f__Sphingomonadaceae, 544841	k__Bacteria, p__Proteobacteria, c__Alphaproteobacteria, o__Sphingomonadales, f__Sphingomonadaceae, g__, s__	4	0	0	0	0	0	0	0	0	0	0	0	0	0	0	0	0	0	0	0	0	0	0	2	0	0	0	0	0	0	0	0	0	0	0	0	0	0	0	2	0	0	0	0	0	GTGCCAGCAGCCGCGGTAATACGAGGGGAGCTAGCGTTATTCGGAATTACTGGGCGTAAAGCGCACGTAGGCGGCTTTGTAAGTTAGAGGTGAAAGCCCGGGGCTCAACTCCGGAATTGCCTTTAAGACTGCATCGCTTGAATCCAGGAGA
f__Hyphomonadaceae, 544561	k__Bacteria, p__Proteobacteria, c__Alphaproteobacteria, o__Rhodobacterales, f__Hyphomonadaceae, g__, s__	551	0	0	0	0	0	376	0	0	0	0	0	3	0	0	0	0	172	0	0	0	0	0	0	0	0	0	0	0	0	0	0	0	0	0	0	0	0	0	0	0	0	0	0	0	AGCAGCCGCGGTAATACGAAGGGGGCTAGCGTTGTTCGGAATTACTGGGCGTAAAGCGCACGTAGGCGGATCGATAAGTAAGGGGTGAAATCCCGGAGCTCAACTCCGGAACTGCCTTTTAAACTGTCGATCTGGAGCAGAGTAGAGGT
g__Corynebacterium, 544480	k__Bacteria, p__Actinobacteria, c__Actinobacteria, o__Actinomycetales, f__Corynebacteriaceae, g__Corynebacterium, s__	133	0	0	0	0	0	0	0	0	0	20	0	0	27	0	0	0	0	0	0	0	0	39	0	14	26	0	0	0	0	0	0	0	0	0	0	6	0	0	0	0	0	0	1	0	AGCAGCCGCGGTAATACGTAGGGTGCGAGCGTTGTCCGGAATTACTGGGCGTAAAGAGCTCGTAGGTGGTTTGTCGCGTCGTCTGTGAAATTCCGGGGCTTAACTCCGGGCGTGCAGGCGATACGGGCATAACTTGAGTGCTGTAGGGG
g__Pseudomonas, 544313	k__Bacteria, p__Proteobacteria, c__Gammaproteobacteria, o__Pseudomonadales, f__Pseudomonadaceae, g__Pseudomonas, s__	95611	217	0	0	351	27	2	38	2	258	11	93	1	0	126	36	0	1	0	45	0	125	3	2153	2066	8465	9614	5159	2936	10236	1039	17435	13806	4755	361	3102	1431	4209	3785	78	877	221	94	88	2365	TGTGCCAGCAGCCGCGGTAATACAGAGGGTGCAAGCGTTAATCGGAATTACTGGGCGTAAAGCGCGCGTAGGTGGTTCGTTAAGTTGGATGTGAAAGCCCCGGGCTCAACCTGGGAACTGCATCCAAAACTGGCGAGCTAGAGTATGGTAGAG
f__Isosphaeraceae, 544089	k__Bacteria, p__Planctomycetes, c__Planctomycetia, o__Gemmatales, f__Isosphaeraceae, g__, s__	301	1	0	0	0	0	278	0	0	0	0	0	21	0	0	0	0	1	0	0	0	0	0	0	0	0	0	0	0	0	0	0	0	0	0	0	0	0	0	0	0	0	0	0	0	AGCAGCCGCGGTAAGACGAACCGTGCGAACGTTATTCGGAATCATTGGGCTTAAAGCGCGTGTAGGCGGATGGGAGCGTCGGTGTTGAAAGCCCCCGGCTCAACCGGGGAATTGGCTCCGAAACGACCCGTCTGGAGGGGCATAGGGGG
g__Methylopila, 544008	k__Bacteria, p__Proteobacteria, c__Alphaproteobacteria, o__Rhizobiales, f__Methylocystaceae, g__Methylopila, s__	26	0	0	0	0	0	0	0	0	0	0	0	1	0	0	0	0	25	0	0	0	0	0	0	0	0	0	0	0	0	0	0	0	0	0	0	0	0	0	0	0	0	0	0	0	GCAGCCGCGGTAATACGAAGGGGGCTAGCGTTGTTCGGAATCACTGGGCGTAAAGCGCACGTAGGCGGACTTTTAAGTCAGGGGTGAAATCCCAAGGCTCAACCTTGGAACTGCCTTTGATACTGGAAGTCTTGAGTTCGGGAGAGG
g__Acinetobacter, 543942	k__Bacteria, p__Proteobacteria, c__Gammaproteobacteria, o__Pseudomonadales, f__Moraxellaceae, g__Acinetobacter, s__	51033	2002	1113	2273	1077	621	83	634	210	1468	448	897	13	812	587	665	1414	6292	1024	412	910	707	807	580	471	2346	2464	1428	1217	2406	308	4578	3461	1062	228	1031	718	1430	1214	150	563	70	43	46	750	TGTGCCAGCAGCCGCGGTAATACAGAGGGTGCGAGCGTTAATCGGATTTACTGGGCGTAAAGCGTGCGTAGGCGGCTTTTTAAGTCGGATGTGAAATCCCCGAGCTTAACTTGGGAATTGCATTCGATACTGGGAAGCTAGAGTATGGGAGAGGATG
g__Azoarcus, 543017	k__Bacteria, p__Proteobacteria, c__Betaproteobacteria, o__Rhodocyclales, f__Rhodocyclaceae, g__Azoarcus, s__	74	0	0	0	0	0	68	0	0	0	0	0	1	0	0	0	0	5	0	0	0	0	0	0	0	0	0	0	0	0	0	0	0	0	0	0	0	0	0	0	0	0	0	0	0	AGCAGCCGCGGTAATACGTAGGGTGCGAGCGTTAATCGGAATTACTGGGCGTAAAGCGTGCGCAGGCGGTTGTGTAAGACAGGTGTGAAATCCCCGGGCTTAACCTGGGAACTGCGCTTGTGACTGCACAGCTAGAGTACGGCAGAGGG
g__Phenylobacterium, 541299	k__Bacteria, p__Proteobacteria, c__Alphaproteobacteria, o__Caulobacterales, f__Caulobacteraceae, g__Phenylobacterium, s__	159	0	0	0	0	0	39	0	0	0	0	0	0	0	0	0	0	0	0	0	0	0	0	2	22	0	0	18	0	0	6	9	22	10	2	13	0	0	12	0	0	0	0	0	4	GTGCCAGCAGCCGCGGTAATACGAAGGGGGCTAGCGTTGCTCGGAATTACTGGGCGTAAAGGGAGCGTAGGCGGATAGTTTAGTCAGAGGTGAAAGCCCAGGGCTCAACCTTGGAATTGCCTTTGATACTGGCTATCTTGAGTATGGAAGAG
g__Leuconostoc, 540940	k__Bacteria, p__Firmicutes, c__Bacilli, o__Lactobacillales, f__Leuconostocaceae, g__Leuconostoc, s__	2	0	0	0	0	0	0	0	0	0	0	0	0	0	0	0	0	0	0	0	0	0	0	0	0	0	0	0	0	0	0	0	0	0	2	0	0	0	0	0	0	0	0	0	0	GTGCCAGCAGCCGCGGTAATACGTATGTCCCGAGCGTTATCCGGATTTATTGGGCGTAAAGCGAGCGCAGACGGTTGATTAAGTCTGATGTGAAAGCCCGGAGCTCAACTCCGGAATGGCATTGGAAACTGGTTAACTTGAGTGCAGTAGA
g__Zoogloea, 539924	k__Bacteria, p__Proteobacteria, c__Betaproteobacteria, o__Rhodocyclales, f__Rhodocyclaceae, g__Zoogloea, s__	5	0	0	0	0	0	2	0	0	0	0	0	0	0	0	0	0	3	0	0	0	0	0	0	0	0	0	0	0	0	0	0	0	0	0	0	0	0	0	0	0	0	0	0	0	GCAGCCGCGGTAATACGTAGGGTGCGAGCGTTAATCGGAATTACTGGGCGTAAAGCGTGCGCAGGCGGTTATGTAAGACAGATGTGAAATCCCCGGGCTTAACCTGGGAACTGCGTTTGTGACTGCATAACTGGAGTACGGCAGAGG
g__Mesorhizobium, 539878	k__Bacteria, p__Proteobacteria, c__Alphaproteobacteria, o__Rhizobiales, f__Phyllobacteriaceae, g__Mesorhizobium, s__	2	0	0	0	0	0	0	0	0	0	0	0	0	0	0	0	0	1	0	0	0	0	1	0	0	0	0	0	0	0	0	0	0	0	0	0	0	0	0	0	0	0	0	0	0	GCAGCCGCGGTAATACGAAGGGGGCTAGCGTTGTTCGGAATTACTGGGCGTAAAGCGCACGTAGGCGGATACTTAAGTCAGGGGTGAAATCCCGGGGCTCAACCCCGGAACTGCCTTTGATACTGGGTATCTGGAGTCCGGAAGAGG
s__firmus, 539360	k__Bacteria, p__Firmicutes, c__Bacilli, o__Bacillales, f__Bacillaceae, g__Bacillus, s__firmus	5	0	0	0	0	0	0	0	0	0	0	0	0	0	0	0	0	0	0	0	0	0	0	0	0	0	0	0	0	0	0	0	0	0	0	0	0	5	0	0	0	0	0	0	0	GTGCCAGCAGCCGCGGTAATACGTAGGTGGCAAGCGTTGTCCGGAATTATTGGGCGTAAAGCGCGCGCAGGCGGTTCCTTAAGTCTGATGTGAAAGCCCCCGGCTCAACCGGGGAGGGTCATTGGAAACTGGGGAACTTGAGTGCAGAAGAG
g__Flectobacillus, 539293	k__Bacteria, p__Bacteroidetes, c__Cytophagia, o__Cytophagales, f__Cytophagaceae, g__Flectobacillus, s__	85441	5	69	41	49	5	12940	181	20	1	4	3	558	1	14	11	2	5	1	3	0	25	0	35381	6	38	79	154	5109	54	9	74	41	10	15978	27	1	59	2	14393	8	12	42	13	13	CGTGCCAGCAGCCGCGGTAATACGGAGGGTGCGAGCGTTGTCCGGATTTATTGGGTTTAAAGGGTGCGTAGGCGGTTTATTAAGTCAGTGGTGAAAGACGGTCGCTCAACGATTGCAGTGCCATTGATACTGGTAGACTTGAGTTCGTATGAG
f__Methylocystaceae, 538998	k__Bacteria, p__Proteobacteria, c__Alphaproteobacteria, o__Rhizobiales, f__Methylocystaceae, g__, s__	100	0	0	0	0	0	19	0	0	0	0	0	1	0	0	0	0	9	0	18	0	0	0	0	0	0	0	0	0	7	20	0	0	8	7	0	0	0	0	3	1	4	0	3	0	GTGCCAGCAGCCGCGGTAATACGAAGGGGGCTAGCGTTGTTCGGAATCACTGGGCGTAAAGCGCACGTAGGCGGATCTTTAAGTCAGGGGTGAAATCCCGAGGCTCAACCTCGGAACTGCCTTTGATACTGGGGATCTCGAGTCCGGGAGAG
g__Pseudonocardia, 538315	k__Bacteria, p__Actinobacteria, c__Actinobacteria, o__Actinomycetales, f__Pseudonocardiaceae, g__Pseudonocardia, s__	23	0	0	0	0	0	0	0	0	0	0	0	0	0	0	0	0	0	0	0	0	0	0	0	0	8	0	3	3	0	1	0	0	3	0	0	1	0	1	0	2	0	1	0	0	GTGCCAGCAGCCGCGGTAATACGTAGGGTGCGAGCGTTGTCCGGAATTATTGGGCGTAAAGAGCTCGTAGGCGGTCTGTCGCGTCGGTCGTGAAAACTTGGGGCTTAACCCTGAGCTTGCGGTCGATACGGGCATGACTGGAGTTCGGCAG
g__Actinomycetospora, 538093	k__Bacteria, p__Actinobacteria, c__Actinobacteria, o__Actinomycetales, f__Pseudonocardiaceae, g__Actinomycetospora, s__	2	0	0	0	0	0	0	0	0	0	0	0	0	0	0	0	0	0	0	0	0	0	0	0	0	0	2	0	0	0	0	0	0	0	0	0	0	0	0	0	0	0	0	0	0	GTGCCAGCAGCCGCGGTAATACGTAGGGTGCGAGCGTTGTCCGGAATTATTGGGCGTAAAGAGCTCGTAGGCGGTGTGTCGCGTCGGCCGTGAAAACCTGGGGCTTAACTCTGGGCGTGCGGTCGATACGGGCATCACTAGAGTTCGGCAGGGG
o__Rhizobiales, 537664	k__Bacteria, p__Proteobacteria, c__Alphaproteobacteria, o__Rhizobiales, f__, g__, s__	15051	0	2	0	0	42	132	1	0	1	4	0	3	219	844	140	888	12271	2	28	113	1	1	227	18	0	11	0	16	0	1	18	4	0	7	0	0	0	10	44	0	0	0	0	3	AGCAGCCGCGGTAATACGAAGGGGGCTAGCGTTGCTCGGAATCACTGGGCGTAAAGGGCGCGTAGGCGGACTCTTAAGTCGGGGGTGAAAGCCCAGGGCTCAACCCTGGAATTGCCTTCGATACTGAGAGTCTTGAGTTCGGAAGAGGT
f__C111, 537516	k__Bacteria, p__Actinobacteria, c__Acidimicrobiia, o__Acidimicrobiales, f__C111, g__, s__	16	0	0	0	0	0	0	0	0	0	0	0	0	0	0	16	0	0	0	0	0	0	0	0	0	0	0	0	0	0	0	0	0	0	0	0	0	0	0	0	0	0	0	0	0	GCAGCCGCGGTGACACGTAGGCACCAAGCGTTGTCCGGATTTATTGGGCGTAAAGAGCTCGTAGGCGGTTCGGTAAGTCGGGTGTGAAAACTCTGGGCTCAACCCAGAGCCGCCACCCGATACTGCTGTGACTCGAGTGCGGTAGGGG
f__Xanthomonadaceae, 537205	k__Bacteria, p__Proteobacteria, c__Gammaproteobacteria, o__Xanthomonadales, f__Xanthomonadaceae, g__, s__	4	0	0	0	0	0	0	0	0	0	0	0	0	0	0	0	0	0	0	0	0	0	0	0	0	0	0	0	0	0	4	0	0	0	0	0	0	0	0	0	0	0	0	0	0	GTGCCAGCAGCCGCGGTAATACGAAGGGTGCAAGCGTTACTCGGAATTACTGGGCGTAAAGCGTGCGTAGGTGGTTCGTTAAGTCTGATGTGAAAGCCCTGGGCTCAACCTGGGAATTGCATTGGATACTGGCGGGCTAGAGTGCGGTAGA
g__Stenotrophomonas, 537062	k__Bacteria, p__Proteobacteria, c__Gammaproteobacteria, o__Xanthomonadales, f__Xanthomonadaceae, g__Stenotrophomonas, s__	7	0	0	0	0	0	0	2	0	0	1	0	0	1	0	0	1	0	1	0	0	0	1	0	0	0	0	0	0	0	0	0	0	0	0	0	0	0	0	0	0	0	0	0	0	GCAGCCGCGGTAATACGAAGGGTGCAAGCGTTACTCGGAATTACTGGGCGTAAAGCGTGCGTAGGTGGTCGTTTAAGTCTGTTGTGAAAGCCCTGGGCTCAACCTGGGAACTGCAGTGGAAACTGGACGACTAGAGTGTGGTAGAGG
f__Rhodocyclaceae, 536847	k__Bacteria, p__Proteobacteria, c__Betaproteobacteria, o__Rhodocyclales, f__Rhodocyclaceae, g__, s__	6	0	0	0	0	0	0	0	0	0	0	0	0	0	0	0	0	0	0	0	0	0	0	0	0	0	0	0	0	0	0	0	0	0	6	0	0	0	0	0	0	0	0	0	0	GTGCCAGCAGCCGCGGTAATACGTAGGGTGCGAGCGTTAATCGGAATTACTGGGCGTAAAGCGTGCGCAGGCGGTTTAGTAAGACAGGCGTGAAATCCCCGGGCTCAACCTGGGAACTGCGCTTGTGACTGCTAAGCTAGAGTACGGCAGA
g__Corynebacterium, 534507	k__Bacteria, p__Actinobacteria, c__Actinobacteria, o__Actinomycetales, f__Corynebacteriaceae, g__Corynebacterium, s__	276	0	44	0	0	0	0	0	0	0	33	0	0	0	47	37	0	0	0	0	0	0	60	0	0	0	8	17	0	8	0	1	0	3	0	5	11	0	0	0	0	0	1	0	1	AGCAGCCGCGGTAATACGTAGGGTGCGAGCGTTGTCCGGAATTACTGGGCGTAAAGAGCTCGTAGGTGGTTTGTCGCGTCGTTTGTGGAATACCGCAGCTTAACTGTGGGGTTGCAGGCGATACGGGCATAACTTGAGTGCTGTAGGGG
g__Acinetobacter, 534204	k__Bacteria, p__Proteobacteria, c__Gammaproteobacteria, o__Pseudomonadales, f__Moraxellaceae, g__Acinetobacter, s__	2	0	0	0	0	0	0	0	0	0	0	0	0	0	0	0	0	2	0	0	0	0	0	0	0	0	0	0	0	0	0	0	0	0	0	0	0	0	0	0	0	0	0	0	0	GTGCCAGCAGCCGCGGTAATACAGAGGGTGCGAGCGTTATTCGGATTTACTGGGCGTAAAGCGTGCGTAGGCGGCTGATTAAGTCGGATGTGAAATCCCTGAGCTTAACTTAGGAATTGCATTCGATACTGGTCAGCTAGAGTATGGGAGAG
f__Comamonadaceae, 533886	k__Bacteria, p__Proteobacteria, c__Betaproteobacteria, o__Burkholderiales, f__Comamonadaceae, g__, s__	2	0	0	0	0	0	2	0	0	0	0	0	0	0	0	0	0	0	0	0	0	0	0	0	0	0	0	0	0	0	0	0	0	0	0	0	0	0	0	0	0	0	0	0	0	GCAGCCGCGGTAATACGTAGGGTGCAAGCGTTAATCGGAATTACTGGGCGTAAAGCGTGCGCAGGCGGTTTTGTAAGACAGAGGTGAAATCCCCGGGCTCAACCTGGGAACTGCCTTTGTGACTGCAAGGCTGGAGTACGGCAGAGG
f__Aeromonadaceae, 532835	k__Bacteria, p__Proteobacteria, c__Gammaproteobacteria, o__Aeromonadales, f__Aeromonadaceae, g__, s__	94	0	0	0	0	0	0	0	0	0	0	0	0	0	0	0	0	0	0	0	0	0	0	0	0	0	0	8	1	0	0	0	0	0	83	0	0	1	0	1	0	0	0	0	0	GTGCCAGCAGCCGCGGTAATACGGAGGGTGCAAGCGTTAATCGGAATTACTGGGCGTAAAGCGCACGCAGGCGGTTGGATAAGTTAGATGTGAAAGCCCCGGGCTCAACCTGGGAATTGCATTTAAAACTGTCCGGCTAGAGTCTTGTAGA
s__lwoffii, 532569	k__Bacteria, p__Proteobacteria, c__Gammaproteobacteria, o__Pseudomonadales, f__Moraxellaceae, g__Acinetobacter, s__lwoffii	2	0	0	0	0	0	0	0	0	0	0	0	0	0	0	0	0	0	0	0	0	0	0	0	0	0	1	0	0	0	0	0	0	0	0	0	0	0	0	1	0	0	0	0	0	GTGCCAGCAGCCGCGGTAATACAGAGGGTGCAAGCGTTAATCGGATTTACTGGGCGTAAAGCGCGCGTAGGTGGCCAATTAAGTCAAATGTGAAATCCCCGAGCTTAACTTGGGAATTGCATTCGATACTGGTTGGCTAGAGTATGGGAGA
f__Peptostreptococcaceae, 531374	k__Bacteria, p__Firmicutes, c__Clostridia, o__Clostridiales, f__Peptostreptococcaceae, g__, s__	19	0	0	0	0	0	0	0	0	0	0	0	0	0	0	0	0	0	0	0	0	0	0	4	0	0	1	0	6	0	0	0	0	0	8	0	0	0	0	0	0	0	0	0	0	GTGCCAGCAGCCGCGGTAATACGTAGGGGGCTAGCGTTATCCGGAATTACTGGGCGTAAAGGGTGCGTAGGTGGTTTCTTAAGTCAGAGGTGAAAGGCTACGGCTCAACCGTAGTAAGCCTTTGAAACTGAGAAACTTGAGTGCAGGAGAG
f__Microbacteriaceae, 529994	k__Bacteria, p__Actinobacteria, c__Actinobacteria, o__Actinomycetales, f__Microbacteriaceae, g__, s__	368	0	0	0	0	0	5	0	0	0	0	0	6	0	0	0	0	0	0	0	0	0	0	271	0	0	0	0	2	0	0	0	0	0	1	0	0	0	0	81	0	0	2	0	0	GTGCCAGCAGCCGCGGTAATACGTAGGGTGCAAGCGTTATCCGGAATTATTGGGCGTAAAGAGCTCGTAGGCGGTTTGTCACGTCTGCTGTGAAAACTGGAGGCTCAACCTCCAGCCTGCAGTGGGTACGGGCAGACTAGAGTGCGGTAGGG
o__SC-I-84, 529644	k__Bacteria, p__Proteobacteria, c__Betaproteobacteria, o__SC-I-84, f__, g__, s__	6	0	0	0	0	0	0	0	0	0	0	0	0	0	0	0	0	0	0	0	0	0	0	0	0	0	0	0	0	0	6	0	0	0	0	0	0	0	0	0	0	0	0	0	0	GTGCCAGCAGCCGCGGTAATACGTAGGGTGCGAGCGTTAATCGGAATTACTGGGCGTAAAGCGTGCGCAGGCGGTTCGTTAAGTTCGATGTGAAAGCCCCGGGCTCAACCTGGGAACTGCATTGGAAACTGGCGAGCTTGAGTGTGGCAGA
f__Pirellulaceae, 529067	k__Bacteria, p__Planctomycetes, c__Planctomycetia, o__Pirellulales, f__Pirellulaceae, g__, s__	34	0	0	0	0	0	0	0	0	0	0	0	0	0	0	0	0	34	0	0	0	0	0	0	0	0	0	0	0	0	0	0	0	0	0	0	0	0	0	0	0	0	0	0	0	GCAGCCGCGGTAACACGAACCGTACGAACGTTATTCGGAATTACTGGGCTTAAAGGGTTTGTAGGCGGCCTTGTAAGTCAGGTGTGAAAGCCCTCGGCTCAACCGAGGAACAGCGCTTGATACTGCAAGGCTTGAGGGAGACAGGGG
f__Enterobacteriaceae, 528421	k__Bacteria, p__Proteobacteria, c__Gammaproteobacteria, o__Enterobacteriales, f__Enterobacteriaceae, g__, s__	102	0	0	0	0	0	1	0	0	0	0	0	0	0	0	0	0	2	0	0	0	0	0	0	0	0	0	0	21	0	0	0	0	0	70	6	0	1	0	1	0	0	0	0	0	GTGCCAGCAGCCGCGGTAATACGGAGGGTGCAAGCGTTAATCGGAATTACTGGGCGTAAAGCGCACGCAGGCGGTCTGTCAAGTCGGATGTGAAATCCCCGGGCTCAACCTGGGAACTGCATCCGAAACTGGCAGGCTAGAGTCTTGTAGAG
g__Phyllobacterium, 527879	k__Bacteria, p__Proteobacteria, c__Alphaproteobacteria, o__Rhizobiales, f__Phyllobacteriaceae, g__Phyllobacterium, s__	40	0	0	1	0	0	0	0	0	0	0	0	0	23	14	0	0	0	0	0	0	0	0	0	0	1	1	0	0	0	0	0	0	0	0	0	0	0	0	0	0	0	0	0	0	AGCAGCCGCGGTAATACGAAGGGGGCTAGCGTTGTTCGGATTTACTGGGCGTAAAGCGCACGTAGGCGGACTATTAAGTCAGGGGTGAAATCCCGGGGCTCAACCCCGGAACTGCCTTTGATACTGGTAGTCTTGAGTTCGAGAGAGG
f__Clostridiaceae, 527630	k__Bacteria, p__Firmicutes, c__Clostridia, o__Clostridiales, f__Clostridiaceae, g__, s__	11	0	0	0	0	0	0	0	0	0	0	0	0	0	0	0	0	0	0	0	0	0	0	0	0	0	0	0	0	0	0	0	0	0	0	0	11	0	0	0	0	0	0	0	0	GTGCCAGCAGCCGCGGTAATACGTAGGGGGCTAGCGTTATCCGGATTTACTGGGCGTAAAGGGTGCGTAGGTGGTCCTTCAAGTCGGTGGTTAAAGGCTACGGCTCAACCGTAGTAAGCCGCCGAAACTGGAGGACTTGAGTGCAGGAGAG
f__Acetobacteraceae, 522046	k__Bacteria, p__Proteobacteria, c__Alphaproteobacteria, o__Rhodospirillales, f__Acetobacteraceae, g__, s__	3	0	0	0	0	0	2	0	0	0	0	0	1	0	0	0	0	0	0	0	0	0	0	0	0	0	0	0	0	0	0	0	0	0	0	0	0	0	0	0	0	0	0	0	0	GCAGCCGCGGTAATACGAAGGGGGCTAGCGTTGCTCGGAATGACTGGGCGTAAAGGGCGCGTAGGCGGTTTGGACCGTCAGATGTGAAATTCCCGGGCTCAACCTGGGGGCTGCATTTGATACGTCCGGACTAGAGTGAGGAAGAGG
s__parvula, 518743	k__Bacteria, p__Firmicutes, c__Clostridia, o__Clostridiales, f__Veillonellaceae, g__Veillonella, s__parvula	158	0	0	0	0	0	0	0	0	0	0	0	0	0	0	0	0	0	0	0	0	0	0	0	0	0	15	0	0	0	4	0	0	0	0	59	80	0	0	0	0	0	0	0	0	GTGCCAGCAGCCGCGGTAATACGTAGGTGGCAAGCGTTGTCCGGAATTATTGGGCGTAAAGCGCGCGCAGGCGGATCAGTCAGTCTGTCTTAAAAGTTCGGGGCTTAACCCCGTGATGGGATGGAAACTGCTGATCTAGAGTATCGGAGAG
f__Comamonadaceae, 518380	k__Bacteria, p__Proteobacteria, c__Betaproteobacteria, o__Burkholderiales, f__Comamonadaceae, g__, s__	275	0	0	0	0	0	151	19	15	0	15	21	39	0	0	0	0	1	0	1	0	0	0	0	0	3	0	0	0	0	0	0	2	7	1	0	0	0	0	0	0	0	0	0	0	AGCAGCCGCGGTAATACGTAGGGTGCAAGCGTTAATCGGAATTACTGGGCGTAAAGCGTGCGCAGGCGGCTTTGCAAGACAGATGTGAAATCCCCGGGCTTAACCTGGGAACTGCATTTGTGACTGCATGGCTGGAGTGCGGCAGAGGG
g__Haemophilus, 517548	k__Bacteria, p__Proteobacteria, c__Gammaproteobacteria, o__Pasteurellales, f__Pasteurellaceae, g__Haemophilus, s__	75	0	0	0	0	0	0	0	0	0	0	0	0	0	0	0	0	0	0	0	0	0	75	0	0	0	0	0	0	0	0	0	0	0	0	0	0	0	0	0	0	0	0	0	0	AGCAGCCGCGGTAATACGGAGGGTGCGAGCGTTAATCGGAATAACTGGGCGTAAAGGGCACGCAGGCGGTTATTTAAGTGAGGTGTGAAAGCCCCGGGCTTAACCTGGGAATTGCATTTCAGACTGGGTAACTAGAGTACTTTAGGGAG
g__Pseudomonas, 516292	k__Bacteria, p__Proteobacteria, c__Gammaproteobacteria, o__Pseudomonadales, f__Pseudomonadaceae, g__Pseudomonas, s__	347	13	61	54	0	0	0	0	12	70	0	0	0	0	13	13	55	0	0	10	0	0	20	0	0	0	0	0	0	0	0	0	0	0	0	5	11	2	3	0	3	1	0	1	0	AGCAGCCGCGGTAATACAGAGGGTGCAAGCGTTAATCGGAATTACTGGGCGTAAAGCGCGCGTAGGTGGTTCGTTAAGTTGAATGTGAAATCCCCGGGCTCAACCTGGGAACTGCATCCAAAACTGGCGAGCTAGAGTATGGTAGAGGG
g__Zoogloea, 514550	k__Bacteria, p__Proteobacteria, c__Betaproteobacteria, o__Rhodocyclales, f__Rhodocyclaceae, g__Zoogloea, s__	35120	50	2	2	0	3	7748	2	2	0	3	0	16	0	0	21	3	12789	4	59	2	7	58	254	0	3	0	0	71	0	5	9	12	0	11214	47	18	26	47	2575	3	5	13	39	8	AGCAGCCGCGGTAATACGTAGGGTGCGAGCGTTAATCGGAATTACTGGGCGTAAAGCGTGCGCAGGCGGTGATGTAAGACAGATGTGAAATCCCCGGGCTCAACCTGGGAACTGCGTTTGTGACTGCATCACTCGAGTACGGCAGAGGGAGGTG
g__Novosphingobium, 513803	k__Bacteria, p__Proteobacteria, c__Alphaproteobacteria, o__Sphingomonadales, f__Sphingomonadaceae, g__Novosphingobium, s__	23	0	0	0	0	0	0	0	0	0	0	0	0	0	0	0	0	0	0	0	0	0	0	21	0	0	0	0	0	0	0	0	0	0	1	0	0	0	0	1	0	0	0	0	0	GTGCCAGCAGCCGCGGTAATACGGAGGGAGCTAGCGTTGTTCGGAATTACTGGGCGTAAAGCGCACGTAGGCGGTTATTCAAGTCAGAGGTGAAAGCCCGGGGCTCAACCCCGGAACTGCCTTTGAAACTAGATGACTGGAATCTTGGAGA
f__Comamonadaceae, 513449	k__Bacteria, p__Proteobacteria, c__Betaproteobacteria, o__Burkholderiales, f__Comamonadaceae, g__, s__	4	0	0	0	0	0	2	0	0	0	0	0	0	0	0	0	0	0	0	0	0	0	0	0	0	0	0	0	0	0	0	0	0	0	2	0	0	0	0	0	0	0	0	0	0	GTGCCAGCAGCCGCGGTAATACGTAGGGTGCAAGCGTTAATCGGAATTACTGGGCGTAAAGCGTGCGCAGGCGGTTATGTAAGACAGAGGTGAAATCCCCGGGCTCAACCTGGGAACTGCCTTTGTGACTGCATAGCTGGAGTGCGGCAGAGG
f__Brucellaceae, 513065	k__Bacteria, p__Proteobacteria, c__Alphaproteobacteria, o__Rhizobiales, f__Brucellaceae, g__, s__	33	0	0	0	0	0	0	0	0	0	0	26	0	0	0	0	0	0	0	0	0	0	0	0	0	0	0	0	0	0	0	0	0	0	0	0	0	0	7	0	0	0	0	0	0	AGCAGCCGCGGTAATACGAAGGGGGCTAGCGTTGTTCGGATTTACTGGGCGTAAAGCGCACGTAGGCGGACTTTTAAGTCAGGGGTGAAATCCCAGAGCTCAACTCTGGAACTGCCTTTGATACTGGAAGTCTTGAGTATGGTAGAGG
o__Acidimicrobiales, 510547	k__Bacteria, p__Actinobacteria, c__Acidimicrobiia, o__Acidimicrobiales, f__, g__, s__	24	0	0	0	0	0	0	0	0	0	17	0	0	0	0	0	1	5	0	0	0	0	1	0	0	0	0	0	0	0	0	0	0	0	0	0	0	0	0	0	0	0	0	0	0	GCAGCCGCGGTAACACGTAGGGGGCAAGCGTTGTCCGGATTTATTGGGCGTAAAGAGCTCGTAGGTGGCTGTGTAAGTCGGGTGTTAAATCCCCAGGCTCAACCTGGGACACCACCCGATACTGCTCTGGCTAGAGTCCGGTAGGGG
g__Actinomyces, 510422	k__Bacteria, p__Actinobacteria, c__Actinobacteria, o__Actinomycetales, f__Actinomycetaceae, g__Actinomyces, s__	11	0	0	0	0	0	0	0	0	0	0	0	0	0	0	0	0	0	0	0	0	0	0	0	0	0	9	0	0	0	0	0	0	0	0	2	0	0	0	0	0	0	0	0	0	GTGCCAGCAGCCGCGGTAATACGTAGGGCGCGAGCGTTGTCCGGAATTATTGGGCGTAAAGAGCTTGTAGGCGGTTGGTCGCGTCTGCTGTGAAAGGCTGGGGCTTAACCCTGGTTTTGCAGTGGGTACGGGCTAACTAGAGTGCAGTAGG
o__Rhizobiales, 510320	k__Bacteria, p__Proteobacteria, c__Alphaproteobacteria, o__Rhizobiales, f__, g__, s__	16	0	0	0	0	0	16	0	0	0	0	0	0	0	0	0	0	0	0	0	0	0	0	0	0	0	0	0	0	0	0	0	0	0	0	0	0	0	0	0	0	0	0	0	0	GCAGCCGCGGTAATACGAAGGGGGCTAGCGTTGTTCGGAATTACTGGGCGTAAAGCGCACGTAGGCGGATACTTAAGTCAGGGGTGAAATCCCGGGGCTCAACCCCGGAACTGCCTTTGATACTGGGTATCTCGAGTCCGGAAGAGG
o__Solirubrobacterales, 509881	k__Bacteria, p__Actinobacteria, c__Thermoleophilia, o__Solirubrobacterales, f__, g__, s__	6	0	0	0	0	0	0	0	0	0	0	0	0	0	0	0	0	0	0	0	0	0	0	0	0	0	0	0	0	0	0	0	0	0	0	0	0	0	6	0	0	0	0	0	0	GTGCCAGCAGCCGCGGTAATACGTAGGGACCAAGCGTTGTCCGGAATCATTGGGCGTAAAGCGCGCGTAGGTGGCCATTTAAGTCCGCTGTGAAAGTCAGAGGCTCAACCTTTGAAAGCCGGTGGATACTGGATGGCTAGAGTACGGAAGA
o__Clostridiales, 509416	k__Bacteria, p__Firmicutes, c__Clostridia, o__Clostridiales, f__, g__, s__	2	0	0	0	0	0	0	0	0	0	0	0	0	0	0	0	0	0	0	0	0	0	0	0	0	0	0	0	0	0	0	0	0	0	0	2	0	0	0	0	0	0	0	0	0	GTGCCAGCAGCCGCGGTAATACGTAGGGGGCAAGCGTTATCCGGAATTACTGGGTGTAAAGGGTGCGTAGGTGGTATGGCAAGTCAGAAGTGAAAACCCAGGGCTTAACTCTGGGACTGCTTTTGAAACTGTCAGACTGGAGTGCAGGAGA
g__Peptoniphilus, 503406	k__Bacteria, p__Firmicutes, c__Clostridia, o__Clostridiales, f__[Tissierellaceae], g__Peptoniphilus, s__	42	0	0	0	0	0	0	0	0	0	0	0	0	0	0	0	0	0	0	0	0	0	0	0	0	0	0	33	0	0	0	0	0	9	0	0	0	0	0	0	0	0	0	0	0	GTGCCAGCAGCCGCGGTAATACGTAGGGGGCTAGCGTTGTCCGGAATCACTGGGCGTAAAGGGTTCGCAGGCGGAAATGCAAGTCAGATGTAAAAGGCAGTAGCTTAACTACTGTAAGCATTTGAAACTGCATATCTTGAGAAGAGTAGAG
g__Corynebacterium, 503389	k__Bacteria, p__Actinobacteria, c__Actinobacteria, o__Actinomycetales, f__Corynebacteriaceae, g__Corynebacterium, s__	210	0	0	0	64	0	0	0	0	0	0	0	0	0	0	0	0	0	0	0	0	0	0	0	0	0	0	2	0	0	1	0	0	0	0	0	0	3	0	0	138	1	1	0	0	GTGCCAGCAGCCGCGGTAATACGTAGGGTGCGAGCGTTGTCCGGAATTACTGGGCGTAAAGAGCTCGTAGGTGGTTTGTCGCGTCGTCTGTGAAATTCCGGGGCTTAACTTCGGGCGTGCAGGCGATACGGGCATAACTTGAGTGCTGTAGG
g__Anaerococcus, 503236	k__Bacteria, p__Firmicutes, c__Clostridia, o__Clostridiales, f__[Tissierellaceae], g__Anaerococcus, s__	5	0	0	0	0	0	0	0	0	0	0	0	0	0	0	0	0	0	0	0	0	0	0	0	0	0	0	0	0	0	0	0	0	0	0	0	0	0	0	0	5	0	0	0	0	GTGCCAGCAGCCGCGGTAATACGTAAGGTCCGAGCGTTGTCCGGAATCATTGGGCGTAAAGGGTACGTAGGCGGGTAAGCAAGTTAGAAGTGAAATCCTATAGCTCAACTATAGTAAGCTTTTAAAACTGCTCATCTTGAGGTATGGAAGG
g__Sphingomonas, 487725	k__Bacteria, p__Proteobacteria, c__Alphaproteobacteria, o__Sphingomonadales, f__Sphingomonadaceae, g__Sphingomonas, s__	55	0	0	0	0	0	0	0	0	0	0	0	0	0	0	0	0	0	55	0	0	0	0	0	0	0	0	0	0	0	0	0	0	0	0	0	0	0	0	0	0	0	0	0	0	GCAGCCGCGGTAATACGGAGGGGGCTAGCGTTGTTCGGAATTACTGGGCGTAAAGCGCACGTAGGCGGCTTTGTAAGTTAGGGGTGAAAGCCTGGAGCTCAACTCCAGAATTGCCTTTAAGACTGCATCGCTTGAATCCAGGAGAGGT
f__Propionibacteriaceae, 468148	k__Bacteria, p__Actinobacteria, c__Actinobacteria, o__Actinomycetales, f__Propionibacteriaceae, g__, s__	8	0	0	0	0	0	0	0	0	0	0	0	0	0	0	0	0	0	0	0	0	0	0	0	0	0	0	0	0	0	0	0	0	0	0	0	0	0	0	0	8	0	0	0	0	GTGCCAGCAGCCGCGGTGATACGTAGGGTGCGAGCGTTGTCCGGATTTATTGGGCGTAAAGAGCTTGTAGGCGGTTGATTGCGTCGAAAGTGCAAACTCAGGGCTTAACTCTGAGCCTGCTTTCGATACGGGTCGACTTGAGGAATGTAGG
o__Streptophyta, 467605	k__Bacteria, p__Cyanobacteria, c__Chloroplast, o__Streptophyta, f__, g__, s__	25	0	0	0	0	0	0	0	0	0	0	0	0	0	0	0	0	0	0	0	0	0	0	0	0	0	0	0	0	0	0	0	0	0	0	0	0	24	0	0	0	0	1	0	0	GTGCCAGCAGCCGCGGTAATACAGAGGATGCAAGCGTTATCCGGAATGATTGGGCGTAAAGCGTCTGTAGGTGGCTTTTTAAGTCCGCCGTCAAATCCCAGGGCTCAACCCTGGACAGGCGGTGGAAACTACCAAGCTGGAGTACGGTAGG
g__Limnohabitans, 463546	k__Bacteria, p__Proteobacteria, c__Betaproteobacteria, o__Burkholderiales, f__Comamonadaceae, g__Limnohabitans, s__	14	0	0	0	0	0	0	0	0	0	0	0	0	0	0	0	0	7	1	0	0	0	0	0	0	0	0	0	0	0	0	0	0	0	6	0	0	0	0	0	0	0	0	0	0	AGCAGCCGCGGTAATACGTAGGGTGCGAGCGTTAATCGGAATTACTGGGCGTAAAGCGTGCGCAGGCGGTTATGTAAGACAGAGGTGAAATCCCCGGGCTCAACCTGGGAACTGCCTTTGTGACTGCATAGCTAGAGTACGGTAGAGG
o__Actinomycetales, 458474	k__Bacteria, p__Actinobacteria, c__Actinobacteria, o__Actinomycetales, f__, g__, s__	13	0	0	0	0	0	0	0	0	0	0	0	0	0	0	0	0	0	0	0	0	0	0	0	0	0	0	0	0	0	0	0	0	0	0	0	0	0	13	0	0	0	0	0	0	GTGCCAGCAGCCGCGGTAATACGTAGGGCGCAAGCGTTGTCCGGAATTATTGGGCGTAAAGAGCTCGTAGGTGGTTTGTCGCGTCTGGTGTGAAATCCCGGGGCTTAACTTCGGGCGTGCATCGGGTACGGGCAGGCTAGAGTGCGGTAGG
f__Oxalobacteraceae, 447724	k__Bacteria, p__Proteobacteria, c__Betaproteobacteria, o__Burkholderiales, f__Oxalobacteraceae, g__, s__	42	0	0	0	0	0	0	0	0	0	0	0	0	0	0	0	0	0	0	0	0	0	0	1	0	0	0	0	0	0	0	0	0	0	0	0	0	0	0	41	0	0	0	0	0	GTGCCGGCAGCCGCGGTAATACGTAGGGTGCAAGCGTTAATCGGAATTACTGGGCGTAAAGCGTGCGCAGGCGGTTTTGTAAGTCTGACGTGAAAGCCCCGGGCTCAACCTGGGAATTGCGTTGGAGACTGCAAGGCTTGAATCTGGCAGAG
f__Aerococcaceae, 445962	k__Bacteria, p__Firmicutes, c__Bacilli, o__Lactobacillales, f__Aerococcaceae, g__, s__	28	0	0	0	0	0	0	0	0	0	0	0	0	0	0	0	0	0	0	0	0	0	0	0	24	0	0	4	0	0	0	0	0	0	0	0	0	0	0	0	0	0	0	0	0	GTGCCAGCAGCCGCGGTAATACGTAGGTGACGAGCGTTGTCCGGAATTATTGGGCGTAAAGGGAGCGCAGGCGGTTGGAATAGTCTGATGTGAAAGCCCACGGCTTAACCGTGGAAGGTCATTGGAAACTGTCCAACTTGAATGCAGAAGA
g__Ralstonia, 437105	k__Bacteria, p__Proteobacteria, c__Betaproteobacteria, o__Burkholderiales, f__Oxalobacteraceae, g__Ralstonia, s__	9	0	0	0	0	0	0	0	0	0	0	0	0	0	0	0	0	0	0	0	0	0	0	0	0	0	0	0	0	0	0	0	0	0	0	0	9	0	0	0	0	0	0	0	0	GTGCCAGCAGCCGCGGTAATACGTAGGGTCCAAGCGTTAATCGGAATTACTGGGCGTAAAGCGTGCGCAGGCGGTTGTGCAAGACCGATGTGAAATCCCCGGGCTTAACCTGGGAATTGCATTGGTGACTGCACGGCTAGAGTGTGTCAGA
f__Microbacteriaceae, 435928	k__Bacteria, p__Actinobacteria, c__Actinobacteria, o__Actinomycetales, f__Microbacteriaceae, g__, s__	22	0	0	0	0	0	0	0	0	0	0	0	0	0	0	0	0	0	0	0	0	0	0	0	0	0	0	5	0	0	0	0	0	0	0	0	0	0	0	0	17	0	0	0	0	GTGCCAGCAGCCGCGGTAATACGTAGGGCGCAAGCGTTGTCCGGAATTATTGGGCGTAAAGAGCTCGTAGGCGGTCTGTCGCGTCTGCTGTGAAATCCCGAGGCTCAACCTCGGGCTTGCAGTGGGTACGGGCAGACTAGAGTGCGGTAGG
g__Flavobacterium, 425968	k__Bacteria, p__Bacteroidetes, c__Flavobacteriia, o__Flavobacteriales, f__Flavobacteriaceae, g__Flavobacterium, s__	2085	0	0	0	39	0	0	0	0	0	0	0	0	0	0	0	71	0	0	0	0	0	0	62	22	133	131	116	203	142	49	278	244	72	15	183	17	104	86	4	30	12	6	6	60	GTGCCAGCAGCCGCGGTAATACGGAGGATCCAAGCGTTATCCGGAATCATTGGGTTTAAAGGGTCCGTAGGCGGTTTAGTAAGTCAGTGGTGAAAGCCCATCGCTCAACGGTGGAACGGCCATTGATACTGCTGAACTTGAATTATTAGGAA
g__Achromobacter, 423327	k__Bacteria, p__Proteobacteria, c__Betaproteobacteria, o__Burkholderiales, f__Alcaligenaceae, g__Achromobacter, s__	550	24	0	84	33	48	0	0	9	53	0	52	0	0	13	0	125	0	59	21	0	20	8	0	0	0	0	0	0	0	0	0	0	0	1	0	0	0	0	0	0	0	0	0	0	GCAGCCGCGGTAATACGTAGGGTGCAAGCGTTAATCGGAATTACTGGGCGTAAAGCGTGCGCAGGCGGTTCGGAAAGAAAGATGTGAAATCCCAGAGCTTAACTTTGGAACTGCATTTTTAACTACCGAGCTAGAGTGTGTCAGAGGG
f__Comamonadaceae, 412392	k__Bacteria, p__Proteobacteria, c__Betaproteobacteria, o__Burkholderiales, f__Comamonadaceae, g__, s__	17	0	0	0	0	0	0	0	0	0	0	0	0	0	0	0	0	0	0	0	0	0	0	1	0	0	0	0	0	0	0	0	0	0	14	0	0	0	0	2	0	0	0	0	0	GTGCCAGCAGCCGCGGTAATACGTAGGGTGCGAGCGTTAATCGGAATTACTGGGCGTAAAGCGTGCGCAGGCGGCTTTGCAAGACAGATGTGAAATCCCCGGGCTCAACCTGGGAACTGCATTTGTGACTGCAAGGCTAGAGTACGGCAGAG
g__Corynebacterium, 410908	k__Bacteria, p__Actinobacteria, c__Actinobacteria, o__Actinomycetales, f__Corynebacteriaceae, g__Corynebacterium, s__	36	0	0	0	0	0	0	0	0	0	0	0	0	0	0	0	0	0	0	0	0	0	0	0	0	0	0	0	0	0	2	0	0	0	0	11	0	11	0	1	8	0	0	0	3	GTGCCAGCAGCCGCGGTAATACGTAGGGTGCGAGCGTTGTCCGGAATTACTGGGCGTAAAGGGCTCGTAGGTGGTTTGTCGCGTCGTCTGTGAAATTCTGGGGCTTAACTCCGGGCGTGCAGGCGATACGGGCATAACTTGAGTGCTGTAG
f__Sphingomonadaceae, 400524	k__Bacteria, p__Proteobacteria, c__Alphaproteobacteria, o__Sphingomonadales, f__Sphingomonadaceae, g__, s__	11	0	0	0	0	0	0	0	0	0	0	0	0	0	0	0	0	0	0	0	0	0	0	7	0	0	0	0	0	0	0	0	0	0	2	0	0	0	0	2	0	0	0	0	0	GTGCCAGCAGCCGCGGTAATACGGAGGGAGCTAGCGTTGTTCGGAATTACTGGGCGTAAAGCGCACGTAGGCGGCTATTCAAGTCGGGGGTGAAAGCCCGGGGCTCAACCCCGGAACTGCCTTCGAAACTAGATAGCTAGAATCTTGGAGA
g__Acinetobacter, 388951	k__Bacteria, p__Proteobacteria, c__Gammaproteobacteria, o__Pseudomonadales, f__Moraxellaceae, g__Acinetobacter, s__	93	0	0	0	1	0	4	0	0	0	0	0	0	0	0	0	0	45	0	0	0	0	0	2	0	0	0	0	2	28	0	2	5	0	0	0	0	2	0	1	0	0	0	0	1	GTGCCAGCAGCCGCGGTAATACGGAGGGTGCAAGCGTTAATCGGATTTACTGGGCGTAAAGCGTGCGTAGGCGGCTTTTTAAGTCGGATGTGAAATCCCCGAGCTTAACTTGGGAATTGCATTCGATACTGGGAAGCTAGAGTATGGGAGAG
s__granulosum, 386088	k__Bacteria, p__Actinobacteria, c__Actinobacteria, o__Actinomycetales, f__Propionibacteriaceae, g__Propionibacterium, s__granulosum	31	0	0	9	0	0	0	0	0	0	0	0	0	0	0	0	0	0	0	0	0	0	0	0	0	4	3	0	0	0	1	0	0	3	0	0	0	10	0	0	0	0	0	0	1	GTGCCAGCAGCCGCGGTGATACATACGGTGCGAGCGTTGTCCGGATTTATTGGGCGTAAAGGGCTCGTAGGCGGTTGATCGCGTCGGAAGTGGAAACTTGATGCTTAACGTTGAGCGTGCTTTCGATACGGGTTGACTTGAGGAAGGTAGGG
f__Sphingobacteriaceae, 382125	k__Bacteria, p__Bacteroidetes, c__Sphingobacteriia, o__Sphingobacteriales, f__Sphingobacteriaceae, g__, s__	37	0	0	0	0	0	4	0	0	0	0	0	2	0	0	0	0	0	0	0	0	0	0	0	0	11	0	0	4	0	2	3	4	0	0	1	1	1	0	3	0	0	0	0	1	GTGCCAGCAGCCGCGGTAATACGGAGGATCCAAGCGTTATCCGGATTTATTGGGTTTAAAGGGTGCGTAGGTGGCCTGTTAAGTCAGGGGTGAAAGACGGTAGCTCAACTATCGCAGTGCCCTTGATACTGATGGGCTTGAATGGACTAGAG
f__Sphingobacteriaceae, 371510	k__Bacteria, p__Bacteroidetes, c__Sphingobacteriia, o__Sphingobacteriales, f__Sphingobacteriaceae, g__, s__	3	0	0	0	0	0	0	0	0	0	0	0	0	0	0	0	0	0	0	0	0	0	0	0	0	0	0	0	0	1	0	1	0	0	1	0	0	0	0	0	0	0	0	0	0	GTGCCAGCAGCCGCGGTAATACGGAGGATCCAAGCGTTATCCGGATTTATTGGGTTTAAAGGGTGCGTAGGCGGCCTATTAAGTCAGGGGTGAAAGACGGTGGCTCAACCATCGCAGTGCCCTTGATACTGATGGGCTTGATTACACTTGA
g__Corynebacterium, 370736	k__Bacteria, p__Actinobacteria, c__Actinobacteria, o__Actinomycetales, f__Corynebacteriaceae, g__Corynebacterium, s__	7	0	0	0	0	0	0	0	0	0	0	0	0	0	0	0	0	0	0	0	0	0	0	0	0	0	0	7	0	0	0	0	0	0	0	0	0	0	0	0	0	0	0	0	0	GTGTCATCAGCCGCGGTAATACGTAGGGTGCGAGCGTTGTCCGGAATTACTGGGCGTAAAGAGCTCGTAGGTGGTTTGTCGCGTCGTTTGTGTAAGTCCGCACCTTAACTGCGGGACTGCAGGCGATACGGGCATAACTTGAGTGCTGTAG
g__Leuconostoc, 363305	k__Bacteria, p__Firmicutes, c__Bacilli, o__Lactobacillales, f__Leuconostocaceae, g__Leuconostoc, s__	3	0	0	0	0	0	0	0	0	0	0	0	0	0	0	0	0	0	0	0	0	0	0	0	0	0	0	0	0	0	0	0	0	0	0	0	3	0	0	0	0	0	0	0	0	GTGCCAGCAGCCGCGGTAATACGTATGTCCCGAGCGTTATCCGGATTTATTGGGCGTAAAGCGAGCGCAGACGGTTAATTAAGTCTGATGTGAAAGCCCGGAGCTCAACTCCGGAAAGGCATTGGAAACTGGTTAACTTGAGTGCAGTAGA
f__Micrococcaceae, 362965	k__Bacteria, p__Actinobacteria, c__Actinobacteria, o__Actinomycetales, f__Micrococcaceae, g__, s__	34	0	0	0	0	0	0	34	0	0	0	0	0	0	0	0	0	0	0	0	0	0	0	0	0	0	0	0	0	0	0	0	0	0	0	0	0	0	0	0	0	0	0	0	0	GCAGCCGCGGTAATACGTAGGGCGCGAGCGTTGTCCGGAATTATTGGGCGTAAAGAGCTTGTAGGCGGTTTGTTGCGTCTGCTGTGAAAGACCGGGGCTTAACCCCGGTATTGCAGTGGGTACGGGCAGACTAGAGTGCAGTAGGGG
g__Bacillus, 360936	k__Bacteria, p__Firmicutes, c__Bacilli, o__Bacillales, f__Bacillaceae, g__Bacillus, s__	19	0	0	0	0	0	0	0	0	0	0	0	0	0	0	0	0	0	0	0	0	0	0	0	0	11	6	0	0	0	0	0	0	0	0	0	0	0	0	1	0	0	0	0	1	GTGCCAGCAGCCGCGGTAATACGTAGGTGGCAAGCGTTGTCCGGAATTATTGGGCGTAAAGGGCTCGCAGGCGGTTTCTTAAGTCTGATGTGAAAGCCCCCGGCTCAACCGGGGAGGGTCATTGGAAACTGGGGAACTTGAGTGCAGAAGA
f__Chitinophagaceae, 360124	k__Bacteria, p__Bacteroidetes, c__[Saprospirae], o__[Saprospirales], f__Chitinophagaceae, g__, s__	174	0	1	0	0	0	103	0	0	0	0	0	0	0	0	0	0	1	0	0	0	0	0	65	0	0	0	0	3	0	0	0	0	0	0	0	0	0	0	0	0	0	1	0	0	AGCAGCCGCGGTAATACGGAGGGTGCAAGCGTTATCCGGATTCACTGGGTTTAAAGGGTGCGTAGGTGGGTCTGTAAGTCAGTGGTGAAATCTCCGAGCTTAACTCGGAAACTGCCATTGATACTATAGGTCTTGAATATCCTGGAGGT
g__Corynebacterium, 359689	k__Bacteria, p__Actinobacteria, c__Actinobacteria, o__Actinomycetales, f__Corynebacteriaceae, g__Corynebacterium, s__	60	0	0	0	0	0	0	0	0	0	0	11	0	0	0	0	0	0	0	0	0	0	0	0	0	0	0	49	0	0	0	0	0	0	0	0	0	0	0	0	0	0	0	0	0	GTGCCAGCAGCCGCGGTAATACGTAGGGTGCGAGCGTTGTCCGGAATTACTGGGCGTAAAGAGCTCGTAGGTGGTTTGTCGCGTCGTTTGTGGAATACCGCAGCTTAACTGCGGGGTTGCAGGCGATACGGGCATAACTTGAGTGCTGTAGG
f__Micrococcaceae, 357522	k__Bacteria, p__Actinobacteria, c__Actinobacteria, o__Actinomycetales, f__Micrococcaceae, g__, s__	7	0	0	0	0	0	0	0	0	0	7	0	0	0	0	0	0	0	0	0	0	0	0	0	0	0	0	0	0	0	0	0	0	0	0	0	0	0	0	0	0	0	0	0	0	GCAGCCGCGGTAATACGTAGGGCGCGAGCGTTGTCCGGAATTATTGGGCGTAAAGAGCTTGTAGGCGGTTTGTCGCGTCTGCTGTGAAAGACCGGGGCTTAACCCCGGTATTGCAGTGGGTACGGGCAGACTAGAGTGCAGTAGGGG
o__Rhizobiales, 355774	k__Bacteria, p__Proteobacteria, c__Alphaproteobacteria, o__Rhizobiales, f__, g__, s__	103	0	0	0	0	0	1	0	0	0	0	0	0	1	1	0	4	73	0	0	0	23	0	0	0	0	0	0	0	0	0	0	0	0	0	0	0	0	0	0	0	0	0	0	0	AGCAGCCGCGGTAATACGAAGGGGGCTAGCGTTGCTCGGAATCACTGGGCGTAAAGGGCGCGTAGGCGGACTTTTAAGTCGGGGGTGAAAGCCCAGGGCTCAACCCTGGAATTGCCTTCGATACTGAGAGTCTTGAGTTCGGAAGAGGT
g__Neisseria, 355750	k__Bacteria, p__Proteobacteria, c__Betaproteobacteria, o__Neisseriales, f__Neisseriaceae, g__Neisseria, s__	105	0	0	78	0	0	0	0	0	0	0	0	0	0	0	0	0	0	0	0	0	0	0	0	0	0	14	2	0	0	0	0	0	0	0	11	0	0	0	0	0	0	0	0	0	AGCAGCCGCGGTAATACGTAGGGTGCGAGCGTTAATCGGAATTACTGGGCGTAAAGCGAGCGCAGACGGTTACTTAAGCAGGATGTGAAATCCCCGGGCTCAACCTGGGAACTGCGTTCTGAACTGGGTGACTAGAGTGTGTCAGAGG
g__Acinetobacter, 353576	k__Bacteria, p__Proteobacteria, c__Gammaproteobacteria, o__Pseudomonadales, f__Moraxellaceae, g__Acinetobacter, s__	16	0	0	1	1	0	0	0	0	3	0	0	0	0	0	0	1	2	0	1	0	0	0	0	0	1	0	1	0	0	0	1	2	0	0	0	0	2	0	0	0	0	0	0	0	AGCAGCCGCGGTAATACAGAGGGTGCGAGCGTTAATCGGATTTACTGGGCGTAAAGCGTGCGTAGGCGGCTTTTTAAGTCGGATGTGAAATCCCTGAGCTTAACTTAGGGAATTGCATTCGATACTGGGAAGCTAGAGTATGGGAGAGG
f__Caulobacteraceae, 352389	k__Bacteria, p__Proteobacteria, c__Alphaproteobacteria, o__Caulobacterales, f__Caulobacteraceae, g__, s__	1646	114	0	58	62	45	2	0	0	93	14	0	0	111	100	77	64	0	216	0	35	92	0	16	31	62	31	66	106	21	3	42	45	0	3	40	0	50	30	0	0	0	1	0	16	AGCAGCCGCGGTAATACGAAGGGGGCTAGCGTTGCTCGGAATTACTGGGCGTAAAGGGAGCGTAGGCGGACATTTAAGTCAGGGGTGAAATCCCGGGGCTCAACCTCGGAATTGCCTTTGATACTGGGTGTCTTGAGTATGAGAGAGGT
c__SBRH58, 352299	k__Bacteria, p__TM6, c__SBRH58, o__, f__, g__, s__	4	0	0	0	0	0	0	0	0	0	0	0	0	0	0	0	0	4	0	0	0	0	0	0	0	0	0	0	0	0	0	0	0	0	0	0	0	0	0	0	0	0	0	0	0	GCCANCGCCGCGGTAATACGAAGGGTGCGAGCGTTATTCGGAATAACTGGGCGTAAAGGGCGCGTAGGCGGTATTCTAAGTCGACGGTTAAAGATCATAGCTTAACTGTGAAAAGGCCGGCGATACTGGAGTGCTAGAGGATAGCAGAGA
s__fragilis, 351231	k__Bacteria, p__Bacteroidetes, c__Bacteroidia, o__Bacteroidales, f__Bacteroidaceae, g__Bacteroides, s__fragilis	70	0	0	0	0	0	0	0	0	0	0	0	0	70	0	0	0	0	0	0	0	0	0	0	0	0	0	0	0	0	0	0	0	0	0	0	0	0	0	0	0	0	0	0	0	AGCAGCCGCGGTAATACGGAGGATCCGAGCGTTATCCGGATTTATTGGGTTTAAAGGGAGCGTAGGTGGACTGGTAAGTCAGTTGTGAAAGTTTGCGGCTCAACCGTAAAATTGCAGTTGATACTGTCAGTCTTGAGTACAGTAGAGGT
s__paradoxus, 350563	k__Bacteria, p__Proteobacteria, c__Betaproteobacteria, o__Burkholderiales, f__Comamonadaceae, g__Variovorax, s__paradoxus	2	0	0	0	0	0	0	0	0	0	0	0	0	0	0	0	0	0	0	0	0	0	0	0	0	0	0	0	0	0	0	0	0	0	2	0	0	0	0	0	0	0	0	0	0	GTGCCAGCAGCCGCGGTAATACGTAGGGTGCAAGCGTTAATCGGAATTACTGGGCGTAAAGCGTGCGCAGGCGGTTATGTAAGACAGTTGTGAAATCCCCGGGCTCAACCTGGGAATTGCATCTGTGACTGCATAGCTAGAGTACGGTAGA
f__Sphingomonadaceae, 349315	k__Bacteria, p__Proteobacteria, c__Alphaproteobacteria, o__Sphingomonadales, f__Sphingomonadaceae, g__, s__	40	0	0	0	0	0	0	0	0	0	0	0	6	1	0	0	0	0	0	0	0	0	0	0	0	0	0	0	10	0	0	0	0	0	23	0	0	0	0	0	0	0	0	0	0	GTGCCAGCAGCCGCGGTAATACGGAGGGAGCTAGCGTTGTTCGGAATTACTGGGCGTAAAGCGCACGTAGGCGGCTACTCAAGTCAGAGGTGAAAGCCCGGGGCTCAACCCCGGAACTGCCTTTGAAACTAGGTGGCTAGAATTTTGGAGAG
g__Flavobacterium, 348328	k__Bacteria, p__Bacteroidetes, c__Flavobacteriia, o__Flavobacteriales, f__Flavobacteriaceae, g__Flavobacterium, s__	2	0	0	0	0	0	2	0	0	0	0	0	0	0	0	0	0	0	0	0	0	0	0	0	0	0	0	0	0	0	0	0	0	0	0	0	0	0	0	0	0	0	0	0	0	GCAGCCGCGGTAATACGGAGGATCCAAGCGTTATCCGGAATCATTGGGTTTAAAGGGTCCGTAGGCGGCCCTGTAAGTCAGTGGTGAAATCTCCCGGCTCAACCGGGAAATTGCCATTGATACTGCAGGGCTTGAATTACTGTGAAG
g__Sphingobium, 346056	k__Bacteria, p__Proteobacteria, c__Alphaproteobacteria, o__Sphingomonadales, f__Sphingomonadaceae, g__Sphingobium, s__	98	0	0	0	0	0	0	0	0	35	0	0	0	0	0	0	0	0	0	0	0	0	0	5	0	15	4	0	10	12	0	4	10	0	0	0	0	0	0	0	0	0	0	0	3	GTGCCAGCAGCCGCGGTAATACGGAGGGAGCTAGCGTTGTTCGGAATTACTGGGCGTAAAGCGCACGTAGGCGGCTATTCAAGTCAGAGGTGAAAGCCCGGGGCTCAACCCCGGAACTGCCTTTGAAACTAGATAGCTTGAATCCAGGAGAG
f__Enterobacteriaceae, 345951	k__Bacteria, p__Proteobacteria, c__Gammaproteobacteria, o__Enterobacteriales, f__Enterobacteriaceae, g__, s__	39	10	4	5	0	2	0	2	0	1	0	1	0	1	1	1	4	0	0	0	0	1	3	0	0	1	0	0	0	0	0	0	0	0	0	2	0	0	0	0	0	0	0	0	0	AGCAGCCGCGGTAATACGGAGGGTGCAAGCGTTAATCGGAATTACTGGGCGTAAAGCGCACGCAGGCGGTTTGTTAAGTCAGATGTGAAATCCCGGGCTCAACCTGGGAACTGCATCTGATACTGGCAAGCTTGAGTCTCGTAGAGGG
g__Zoogloea, 344216	k__Bacteria, p__Proteobacteria, c__Betaproteobacteria, o__Rhodocyclales, f__Rhodocyclaceae, g__Zoogloea, s__	1248	0	0	0	0	2	206	0	0	0	0	0	1	2	0	2	1	885	3	1	2	1	2	47	0	0	3	0	10	6	0	4	1	0	42	0	0	2	0	15	6	0	0	0	4	AGCAGCCGCGGTAATACGTAGGGTGCGAGCGTTAATCGGAATTACTGGGCGTAAAGCGTGCGCAGGCGGTTATGTAAGACAGATGTGAAATCCCCGGGCTCAACCTGGGAACTGCGTTTGTGACTGCATAACTAGAGTACGGCAGAGGG
f__Oxalobacteraceae, 343569	k__Bacteria, p__Proteobacteria, c__Betaproteobacteria, o__Burkholderiales, f__Oxalobacteraceae, g__, s__	10	0	0	0	0	0	0	0	0	0	0	0	0	0	0	0	0	10	0	0	0	0	0	0	0	0	0	0	0	0	0	0	0	0	0	0	0	0	0	0	0	0	0	0	0	GCAGCCGCGGTAATACGTAGGGTGCGAGCGTTAATCGGAATTACTGGGCGTAAAGCGTGCGCAGGCGGTTATATAAGACAGATGTGAAATCCCCGGGCTCAACCTGGGAACTGCATTTGTGACTGTATAGCTGGAGTGCGGCAGAGG
g__Zoogloea, 343120	k__Bacteria, p__Proteobacteria, c__Betaproteobacteria, o__Rhodocyclales, f__Rhodocyclaceae, g__Zoogloea, s__	45	0	0	0	0	0	4	0	0	0	0	0	0	0	0	0	0	4	0	0	0	0	0	0	0	0	0	0	0	0	0	0	0	0	26	0	0	0	0	11	0	0	0	0	0	CGTGCCAGCAGCCGCGGTAATACGTAGGGTGCGAGCGTTAATCGGAATTACTGGGCGTAAAGCGTGCGCAGGCGGTGATGTAAGACAGATGTGAAATCCCCGGGCTCAACCTGGGAACTGCGTTTGTGACTGCATCACTCGAGTACGGCAGAA
s__johnsonii, 343089	k__Bacteria, p__Proteobacteria, c__Gammaproteobacteria, o__Pseudomonadales, f__Moraxellaceae, g__Acinetobacter, s__johnsonii	1007	0	194	17	93	0	0	40	4	0	0	112	0	112	9	100	0	2	58	40	91	28	24	0	0	0	0	0	1	0	0	0	0	0	9	17	17	13	12	0	5	4	1	1	3	AGCAGCCGCGGTAATACAGAGGGTGCGAGCGTTAATCGGATTTACTGGGCGTAAAGCGTGCGTAGGCGGCTTCTTAAGTCGGATGTGAAATCCCTGAGCTTAACTTAGGAATTGCATTCGATACTGGGAAGCTAGAGTATGGGAGAGGA
s__dispar, 342427	k__Bacteria, p__Firmicutes, c__Clostridia, o__Clostridiales, f__Veillonellaceae, g__Veillonella, s__dispar	23	0	0	0	0	0	0	0	0	0	0	0	0	0	0	0	0	0	0	0	0	0	23	0	0	0	0	0	0	0	0	0	0	0	0	0	0	0	0	0	0	0	0	0	0	GCAGCCGCGGTAATACGTAGGTGGCAAGCGTTGTCCGGAATTATTGGGCGTAAAGCGCGCGCAGGCGGATTGGTCAGTCTGTCTTAAAAGTTCGGGGCTTAACCCCGTGATGGGATGGAAACTGCCAATCTAGAGTATCGGAGAGGAA
f__Verrucomicrobiaceae, 341698	k__Bacteria, p__Verrucomicrobia, c__Verrucomicrobiae, o__Verrucomicrobiales, f__Verrucomicrobiaceae, g__, s__	101	0	0	0	0	0	0	0	0	0	0	0	0	0	0	0	1	0	2	30	40	1	27	0	0	0	0	0	0	0	0	0	0	0	0	0	0	0	0	0	0	0	0	0	0	AGCAGCCGCGGTAATACGAAGGTCCCAAGCGTTGTTCGGAATCACTGGGCGTAAAGGGAGCGTAGGCGGCGTGGTAAGTCAGATGTGAAATCCCGGGGCTCAACCCCGGAACTGCATCCGATACTGCCATGCTTGAGGGTTGGAGAGGT
f__Leuconostocaceae, 339358	k__Bacteria, p__Firmicutes, c__Bacilli, o__Lactobacillales, f__Leuconostocaceae, g__, s__	9	0	0	0	0	0	0	0	0	0	0	0	0	0	0	0	0	0	0	0	0	0	0	0	0	0	0	0	0	0	0	2	0	0	0	7	0	0	0	0	0	0	0	0	0	GTGCCAGCAGCCGCGGTAATACGTATGTTCCAAGCGTTATCCGGATTTATTGGGCGTAAAGCGAGCGCAGACGGTTATTTAAGTCTGAAGTGAAAGCCCTCAGCTCAACTGAGGAATTGCTTTGGAAACTGGATGACTTGAGTGCAGTAGA
f__Comamonadaceae, 336824	k__Bacteria, p__Proteobacteria, c__Betaproteobacteria, o__Burkholderiales, f__Comamonadaceae, g__, s__	33	0	0	0	0	0	12	0	0	0	0	0	0	0	0	0	0	21	0	0	0	0	0	0	0	0	0	0	0	0	0	0	0	0	0	0	0	0	0	0	0	0	0	0	0	GCAGCCGCGGTAATACGTAGGGTGCAAGCGTTAATCGGAATTACTGGGCGTAAAGCGTGCGCAGGCGGCTTTGCAAGACAGATGTGAAATCCCCGGGCTCAACCTGGGAACTGCATTTGTGACTGCATGGCTAGAGTACGGCAGAGGG
f__Rhizobiaceae, 336364	k__Bacteria, p__Proteobacteria, c__Alphaproteobacteria, o__Rhizobiales, f__Rhizobiaceae, g__, s__	24	0	0	0	0	0	2	0	0	0	0	0	0	0	0	0	0	22	0	0	0	0	0	0	0	0	0	0	0	0	0	0	0	0	0	0	0	0	0	0	0	0	0	0	0	AGCAGCCGCGGTAATACGAAGGGGGCTAGCGTTGTTCGGAATTACTGGGCGTAAAGCGCACGTAGGCGGATCGATCAGTCAGGGGTGAAATCCCAGAGCTCAACTCTGGAACTGCCTTTGATACTGTCGATCTAGAGTATGGAAGAGG
o__Burkholderiales, 334459	k__Bacteria, p__Proteobacteria, c__Betaproteobacteria, o__Burkholderiales, f__, g__, s__	27	5	1	1	1	1	0	0	0	3	0	3	0	1	0	0	4	0	0	1	3	0	3	0	0	0	0	0	0	0	0	0	0	0	0	0	0	0	0	0	0	0	0	0	0	GCAGCCGCGGTAATACGTAGGGTGCGAGCGTTAATCGGAATTACTGGGCGTAAAGCGTGCGCAGGCGGTTTGTTAAGTCAGATGTGAAATCCCCGGGCTCAACCTGGGAACTGCATCTGATACTGGCAAGCTTGAGTCTCGTAGAGGG
s__delafieldii, 334067	k__Bacteria, p__Proteobacteria, c__Betaproteobacteria, o__Burkholderiales, f__Comamonadaceae, g__Acidovorax, s__delafieldii	38383	0	4	1	1	2	345	1	0	57	50	42	81	238	718	111	580	9676	5194	828	2137	1395	1501	2936	252	527	821	508	456	711	98	1320	1051	274	2136	203	76	278	246	3111	110	25	37	44	201	AGCAGCCGCGGTAATACGTAGGGTGCGAGCGTTAATCGGAATTACTGGGCGTAAAGCGTGCGCAGGCGGTTATGTAAGACAGATGTGAAATCCCCGGGCTCAACCTGGGAACTGCATTTGTGACTGCATAGCTAGAGTACGGCAGAGGGGGA
g__Hyphomicrobium, 332595	k__Bacteria, p__Proteobacteria, c__Alphaproteobacteria, o__Rhizobiales, f__Hyphomicrobiaceae, g__Hyphomicrobium, s__	21	0	0	0	0	0	18	0	0	0	0	0	1	0	0	0	0	2	0	0	0	0	0	0	0	0	0	0	0	0	0	0	0	0	0	0	0	0	0	0	0	0	0	0	0	GCAGCCGCGGTAATACGAAGGGGGCTAGCGTTGTTCGGAATTACTGGGCGTAAAGCGCACGTAGGCGGATTTGTAAGTCAGGGGTGAAATCCCGGGGCTCAACCTCGGAACTGCCTTTGATACTGCAAGTCTCGAGTCCGGAAGAGG
g__Limnohabitans, 332569	k__Bacteria, p__Proteobacteria, c__Betaproteobacteria, o__Burkholderiales, f__Comamonadaceae, g__Limnohabitans, s__	2	0	0	0	0	0	0	0	0	0	0	0	0	0	0	0	0	2	0	0	0	0	0	0	0	0	0	0	0	0	0	0	0	0	0	0	0	0	0	0	0	0	0	0	0	GCAGCCGCGGTAATACGTAGGGTGCAAGCGTTAATCGGAATTACTGGGCGTAAAGCGTGCGCAGGCGGTTATATAAGACAGGTGTGAAATCCCCGGGCTCAACCTGGGAACTGCATTTGTGACTGTATAGCTAGAGTACGGTAGAGG
f__Rhodocyclaceae, 330923	k__Bacteria, p__Proteobacteria, c__Betaproteobacteria, o__Rhodocyclales, f__Rhodocyclaceae, g__, s__	265	135	0	39	0	0	33	0	0	0	0	0	0	0	0	0	0	18	16	0	0	0	0	0	0	0	0	0	0	0	0	0	3	0	0	0	0	14	0	0	7	0	0	0	0	AGCAGCCGCGGTAATACGTAGGGTGCGAGCGTTAATCGGAATTACTGGGCGTAAAGCGTGCGCAGGCGGTGATGTAAGACAGATGTGAAATCCCCGGGCTCAACCTGGGAACTGCATTTGTGACTGCATCGCTGGAGTGCGGCAGAGGG
s__xenophagum, 330844	k__Bacteria, p__Proteobacteria, c__Alphaproteobacteria, o__Sphingomonadales, f__Sphingomonadaceae, g__Sphingobium, s__xenophagum	30	0	0	0	0	0	0	0	0	0	0	0	7	0	0	0	0	0	0	0	0	0	0	2	0	0	0	0	0	0	0	0	2	0	0	0	0	0	0	19	0	0	0	0	0	GTGCCAGCAGCCGCGGTAATACGGAGGGAGCTAGCGTTGTTCGGAATTACTGGGCGTAAAGCGCACGTAGGCGGCGATTTAAGTCAGAGGTGAAAGCCCGGGGCTCAACCCCGGAACTGCCTTTGAGACTGGATTGCTAGAATCTTGGAGAG
g__Delftia, 330070	k__Bacteria, p__Proteobacteria, c__Betaproteobacteria, o__Burkholderiales, f__Comamonadaceae, g__Delftia, s__	71	0	0	0	0	0	0	0	0	0	0	0	0	0	0	0	0	13	1	0	0	0	0	23	0	0	3	0	1	0	0	0	1	0	12	0	0	0	0	14	0	3	0	0	0	CGTGCCAGCAGCCGCGGTAATACGTAGGGTGCAAGCGTTAATCGGAATTACTGGGCGTAAAGCGTGCGCAGGCGGTTATGTAAGACAGATGTGAAATCCCCGGGCTCAACCTGGGAACTGCATTTGTGACTGCATGGCTAGAGTACGGAGAA
f__Comamonadaceae, 328912	k__Bacteria, p__Proteobacteria, c__Betaproteobacteria, o__Burkholderiales, f__Comamonadaceae, g__, s__	36	0	0	0	0	0	8	0	0	0	0	0	0	0	0	0	0	26	0	0	0	0	0	0	0	0	0	0	1	0	0	0	0	0	0	0	0	0	0	1	0	0	0	0	0	AGCAGCCGCGGTAATACGTAGGGTGCAAGCGTTAATCGGAATTACTGGGCGTAAAGCGTGCGCAGGCGGTTTTGTAAGACAGATGTGAAATCCCCGGGCTCAACCTGGGAACTGCATTTGTGACTGTATAGCTGGAGTGCGGCAGAGG
f__Pseudomonadaceae, 328340	k__Bacteria, p__Proteobacteria, c__Gammaproteobacteria, o__Pseudomonadales, f__Pseudomonadaceae, g__, s__	1133	0	0	0	0	0	0	0	0	0	0	0	0	0	25	24	1	989	0	0	0	0	0	63	1	1	4	8	8	1	0	1	1	0	0	0	0	5	0	1	0	0	0	0	0	AGCAGCCGCGGTAATACGAAGGGTGCAAGCGTTAATCGGAATTACTGGGCGTAAAGCGCGCGTAGGTGGTTCGTTAAGTTGGATGTGAAAGCCCCGGGCTCAACCTGGGAACTGCATCCAAAACTGGCGAGCTAGAGTACGGTAGAGGG
g__Sphingomonas, 328080	k__Bacteria, p__Proteobacteria, c__Alphaproteobacteria, o__Sphingomonadales, f__Sphingomonadaceae, g__Sphingomonas, s__	3	0	0	0	0	0	0	0	0	3	0	0	0	0	0	0	0	0	0	0	0	0	0	0	0	0	0	0	0	0	0	0	0	0	0	0	0	0	0	0	0	0	0	0	0	GCAGCCGCGGTAATACGGAGGGGGCTAGCGTTGTTCGGAATTACTGGGCGTAAAGCGCACGTAGGCGGCTTTGTAAGTTAGAGGTGAAAGCCTGGAGCTTAACTCCAGAACTGCCTTTAAGACTGCATCGCTTAAATCCAGGAGAGG
f__Oxalobacteraceae, 327622	k__Bacteria, p__Proteobacteria, c__Betaproteobacteria, o__Burkholderiales, f__Oxalobacteraceae, g__, s__	6	0	0	0	0	0	0	0	0	0	0	0	0	0	0	0	0	0	0	0	0	0	0	0	0	0	0	0	1	0	0	0	0	0	5	0	0	0	0	0	0	0	0	0	0	GTGTCAGCAGCCGCGGTAATACGTAGGGTGCAAGCGTTAATCGGAATTACTGGGCGTAAAGCGTGCGCAGGCGGTTTTGTAAGTCTGTCGTGAAATCCCCTGGCTCAACCTGGGAATTGCGATGGAGACTGCAAGGCTAGAATCTGGCAGAG
g__Fluviicola, 327084	k__Bacteria, p__Bacteroidetes, c__Flavobacteriia, o__Flavobacteriales, f__Cryomorphaceae, g__Fluviicola, s__	3	0	0	0	0	0	0	0	0	0	0	0	0	0	0	0	0	0	0	0	0	0	0	0	0	0	0	0	3	0	0	0	0	0	0	0	0	0	0	0	0	0	0	0	0	GTGCCAGCAGCCGCGGTAATACGGAGGGTGCAAGCGTTATCCGGAATCATTGGGTTTAAAGGGTCCGCAGGCGGATTTATAAGTCAGTGGTGAAAGCCTACAGCTTAACTGTAGAACTGCCATTGATACTGTAAGTCTTGAATTCGGTCGA
g__Rhodobacter, 325763	k__Bacteria, p__Proteobacteria, c__Alphaproteobacteria, o__Rhodobacterales, f__Rhodobacteraceae, g__Rhodobacter, s__	2	0	0	0	0	0	0	0	0	0	0	0	0	0	0	0	0	2	0	0	0	0	0	0	0	0	0	0	0	0	0	0	0	0	0	0	0	0	0	0	0	0	0	0	0	GCAGCCGCGGTAATACGGAGGGGGCTAGCGTTATTCGGAATTACTGGGCGTAAAGCGCACGTAGGCGGATTGGAAAGTCAGAGGTGAAATCCCAGGGCTCAACCTTGGAACTGCCTTTGAAACTCCCAGTCTTGAGGTCGAGAGAGG
f__Sphingobacteriaceae, 324699	k__Bacteria, p__Bacteroidetes, c__Sphingobacteriia, o__Sphingobacteriales, f__Sphingobacteriaceae, g__, s__	25	0	0	0	0	0	0	0	0	0	0	0	0	0	0	0	0	0	0	0	0	0	0	12	0	10	0	0	2	0	0	0	0	0	0	0	0	0	0	1	0	0	0	0	0	GTGCCAGCAGCCGCGGTAATACGGAGGATCCGAGCGTTATCCGGATTTATTGGGTTTAAAGGGTGCGTAGGCGGCCTGTTAAGTCAGGGGTGAAAGACGGTAGCTCAACTATCGCAGTGCCCTTGATACTGATGGGCTTGAATGTACTAGAG
g__Leptotrichia, 324532	k__Bacteria, p__Fusobacteria, c__Fusobacteriia, o__Fusobacteriales, f__Leptotrichiaceae, g__Leptotrichia, s__	27	0	0	0	0	0	0	0	0	0	0	0	0	0	0	0	0	0	0	27	0	0	0	0	0	0	0	0	0	0	0	0	0	0	0	0	0	0	0	0	0	0	0	0	0	GCAGCCGCGGTAATACGTATGTCGCGAGCGTTATCCGGAATTATTGGGCATAAAGGGCATCTAGGCGGCCTAACAAGTCAGGGGTGAAAACCTGCGGCTCAACCGCAGGCCTGCCTTTGAAACTGATAGGCTGGAGTACCGGAGAGGT
g__Rhodobacter, 321409	k__Bacteria, p__Proteobacteria, c__Alphaproteobacteria, o__Rhodobacterales, f__Rhodobacteraceae, g__Rhodobacter, s__	908	0	0	0	0	0	0	0	0	0	0	0	0	0	0	0	0	0	0	0	0	0	0	3	0	0	1	0	576	1	0	0	0	0	325	0	0	1	0	0	0	0	0	1	0	GTGCCAGCAGCCGCGGTAATACGGAGGGGGCTAGCGTTGTTCGGAATTACTGGGCGTAAAGCGCACGTAGGCGGACTGGAAAGTCAGAGGTGAAATCCCAGGGCTCAACCTTGGAACTGCCTTTGAAACTCCCAGTCTTGAGGTCGAGAGAG
g__Rathayibacter, 318726	k__Bacteria, p__Actinobacteria, c__Actinobacteria, o__Actinomycetales, f__Microbacteriaceae, g__Rathayibacter, s__	29	0	0	0	0	0	7	0	0	0	0	0	1	0	0	0	0	0	0	0	0	0	0	8	0	0	1	0	10	0	0	0	0	0	2	0	0	0	0	0	0	0	0	0	0	GTGCCAGCAGCCGCGGTAATACGTAGGGTGCGAGCGTTGTCCGGAATTATTGGGCGTAAAGAGCTCGTAGGCGGTCTGTCGCGTCTGCTGTGAAAACCCGAGGCTCAACCTCGGGCCTGCAGTGGGTACGGGCAGACTAGAGTGCGGTAGGG
f__Moraxellaceae, 318451	k__Bacteria, p__Proteobacteria, c__Gammaproteobacteria, o__Pseudomonadales, f__Moraxellaceae, g__, s__	2	0	0	0	0	0	0	0	0	0	0	0	0	0	0	0	0	0	0	0	0	0	0	0	0	0	0	0	0	0	0	2	0	0	0	0	0	0	0	0	0	0	0	0	0	GTGCCAGCAGCCGCGGTAATACAGAGGGTGTAAGCGTTAATCGGAATTACTGGGCGTAAAGCGCGCGTAGGTGGTTTGTTAAGTTGGATGTGAAAGCCCCGGGCTCAACCTGGGAACTGCATCCAAAACTGGCAAGCTAGAGTACGGTAG
f__Comamonadaceae, 317724	k__Bacteria, p__Proteobacteria, c__Betaproteobacteria, o__Burkholderiales, f__Comamonadaceae, g__, s__	8	0	0	0	0	0	8	0	0	0	0	0	0	0	0	0	0	0	0	0	0	0	0	0	0	0	0	0	0	0	0	0	0	0	0	0	0	0	0	0	0	0	0	0	0	GCAGCCGCGGTAATACGTAGGGTGCAAGCGTTAATCGGAATTACTGGGCGTAAAGCGTGCGCAGGCGGTTGTGCAAGACAGATGTGAAATCCCCGGGCTCAACCTGGGAACTGCATTTGTGACTGCACGACTGGAGTACGGCAGAGG
g__Ramlibacter, 317424	k__Bacteria, p__Proteobacteria, c__Betaproteobacteria, o__Burkholderiales, f__Comamonadaceae, g__Ramlibacter, s__	33	0	0	0	0	0	18	0	0	0	0	0	0	0	0	0	0	4	4	0	1	0	1	0	0	0	1	0	1	0	1	0	0	0	2	0	0	0	0	0	0	0	0	0	0	AGCAGCCGCGGTAATACGTAGGGTGCGAGCGTTAATCGGAATTACTGGGCGTAAAGCGTGCGCAGGCGGTTATGTAAGACAGGTGTGAAATCCCCGGGCTTAACCTGGGAACTGCATTTGTGACTGCATAGCTAGAGTACGGTAGAGG
g__Pedobacter, 317024	k__Bacteria, p__Bacteroidetes, c__Sphingobacteriia, o__Sphingobacteriales, f__Sphingobacteriaceae, g__Pedobacter, s__	35	0	0	0	0	0	9	0	0	0	0	0	1	0	0	0	0	0	0	0	0	0	0	0	0	2	3	0	1	2	0	8	7	0	0	0	0	0	1	1	0	0	0	0	0	GTGCCAGCAGCCGCGGTAATACGGAGGATCCAAGCGTTATCCGGATTTATTGGGTTTAAAGGGTGCGTAGGCGGCCTGTTAAGTCAGGGGTGAAAGACGGTGGCTCAACCATCGCAGTGCCCTTGATACTGATGGGCTTGAATGGACTAGAG
f__Methylobacteriaceae, 316924	k__Bacteria, p__Proteobacteria, c__Alphaproteobacteria, o__Rhizobiales, f__Methylobacteriaceae, g__, s__	2172	0	0	0	0	0	0	0	0	0	0	0	0	0	0	0	0	0	0	0	0	8	0	1124	47	1	8	100	44	0	0	0	4	20	8	0	0	0	0	771	22	5	3	7	0	GTGCCAGCAGCCGCGGTAATACGAAGGGGGCTAGCGTTGCTCGGAATCACTGGGCGTAAAGGGCGCGTAGGCGGCTGATTTAGTCGAGGGTGAAAGCCCGTGGCTCAACCACGGAATGGCCTTCGATACTGGTTGGCTTGAGACCGGAAGAG
s__johnsonii, 311837	k__Bacteria, p__Proteobacteria, c__Gammaproteobacteria, o__Pseudomonadales, f__Moraxellaceae, g__Acinetobacter, s__johnsonii	3216	60	186	287	458	39	1	173	4	168	92	116	0	57	75	73	256	25	215	120	185	108	139	3	0	8	0	1	25	0	0	3	4	0	75	66	54	103	21	2	8	1	0	1	4	AGCAGCCGCGGTAATACAGAGGGTGCGAGCGTTAATCGGATTTACTGGGCGTAAAGCGTGCGTAGGCGGCTTTTTAAGTCGGATGTGAAATCCCTGAGCTTAACTTAGGAATTGCATTCGATACTGGGAAGCTAGAGTATGGGAGAGGA
g__Acinetobacter, 309940	k__Bacteria, p__Proteobacteria, c__Gammaproteobacteria, o__Pseudomonadales, f__Moraxellaceae, g__Acinetobacter, s__	5	0	0	0	0	0	0	0	0	0	0	0	0	0	0	0	0	0	0	0	0	0	0	0	2	0	0	0	0	0	0	0	1	0	0	0	0	0	1	0	1	0	0	0	0	GTGCCAGCAGCCGCGGTAATACAGAGGGTGCGAGCGTTAATCGGATTTACTGGGCGTAAAGCGTGCGTAGGCGGCTGATTAAGTCGGATGTGAAATCCCTGAGCTTAACTTAGGAATTGCATTCGATACTGNTCAGCTAGAGTATGGGAGAG
g__Sphingobium, 309695	k__Bacteria, p__Proteobacteria, c__Alphaproteobacteria, o__Sphingomonadales, f__Sphingomonadaceae, g__Sphingobium, s__	3	0	0	0	0	0	0	0	0	0	0	0	0	0	0	0	0	0	0	0	0	0	0	2	0	0	0	0	0	0	0	0	0	0	1	0	0	0	0	0	0	0	0	0	0	GTGCCAGCAGCCGCGGTAATACGGAGGGAGCTAGCGTTGTTCGGAATTACTGGGCGTAAAGCGCACGTAGGCGGCTATTCAAGTCAGAGGTGAAAGCCCGGGGCTCAACCCCGGAACCGCCTTTGAAACTAGATAGCTTGAATCCAGGAGA
f__Comamonadaceae, 306159	k__Bacteria, p__Proteobacteria, c__Betaproteobacteria, o__Burkholderiales, f__Comamonadaceae, g__, s__	13	0	0	0	0	0	13	0	0	0	0	0	0	0	0	0	0	0	0	0	0	0	0	0	0	0	0	0	0	0	0	0	0	0	0	0	0	0	0	0	0	0	0	0	0	GCAGCCGCGGTAATACGTAGGGTGCGAGCGTTAATCGGAATTACTGGGCGTAAAGCGTGCGCAGGCGGTCTTGCAAGACAGGTGTGAAATCCCCGGGCTTAACCTGGGAACTGCACTTGTGACTGCAAGGCTGGAGTACGGCAGAGG
f__Comamonadaceae, 305915	k__Bacteria, p__Proteobacteria, c__Betaproteobacteria, o__Burkholderiales, f__Comamonadaceae, g__, s__	112	0	1	0	0	0	95	0	0	0	0	0	1	0	0	0	0	15	0	0	0	0	0	0	0	0	0	0	0	0	0	0	0	0	0	0	0	0	0	0	0	0	0	0	0	GCAGCCGCGGTAATACGTAGGGTGCAAGCGTTAATCGGAATTACTGGGCGTAAAGCGTGCGCAGGCGGTTGTGCAAGACAGGTGTGAAATCCCCGGGCTTAACCTGGGAACTGCACTTGTGACTGCACGGCTGGAGTACGGCAGAGGG
f__Enterobacteriaceae, 304641	k__Bacteria, p__Proteobacteria, c__Gammaproteobacteria, o__Enterobacteriales, f__Enterobacteriaceae, g__, s__	12	0	0	0	0	0	0	0	0	0	0	0	0	0	0	0	0	0	0	0	0	0	0	0	0	1	0	1	0	1	0	1	0	0	0	4	2	0	0	0	0	2	0	0	0	AGCAGCCGCGGTAATACGGAGGGTGCAAGCGTTAATCGGAATTACTGGGCGTAAAGCGCACGCAGGCGGTTTGTTAAGTCAGATGTGAAATCCCCGGGCTCAACCTGGGAACTGCATCTGATACTGGCAAGCTTGAGTCTCGTAGAGGG
g__Acinetobacter, 302877	k__Bacteria, p__Proteobacteria, c__Gammaproteobacteria, o__Pseudomonadales, f__Moraxellaceae, g__Acinetobacter, s__	20	0	0	0	0	0	0	0	0	0	0	0	0	0	0	0	0	0	0	0	0	0	0	0	0	0	0	1	0	2	1	2	0	0	0	0	1	0	12	0	0	0	1	0	0	GTGCCAGCAGCCGCGGTAATACAGAGGGTGCGAGCGTTAATCGGATTTACTGGGCGTAAAGCGTACGTAGGCGGCTTTTTAAGTCGGATGTGAAATCCCTGAGCTTAACTTAGGAATTGCATTCGATACTGGGAAGCTAGAGTATGGGAGA
g__Comamonas, 302302	k__Bacteria, p__Proteobacteria, c__Betaproteobacteria, o__Burkholderiales, f__Comamonadaceae, g__Comamonas, s__	88	0	0	0	0	0	72	0	0	0	0	0	0	0	0	0	0	0	0	0	0	0	0	2	0	0	0	0	6	0	1	0	0	0	2	0	0	0	0	3	0	0	2	0	0	AGCAGCCGCGGTAATACGTAGGGTGCAAGCGTTAATCGGAATTACTGGGCGTAAAGCGTGCGCAGGCGGTTTTGTAAGACAGTGGTGAAATCCCCGGGCTCAACCTGGGAACTGCCATTGTGACTGCAAGGCTAGAGTACGGCAGAGGG
g__Solibacillus, 299913	k__Bacteria, p__Firmicutes, c__Bacilli, o__Bacillales, f__Planococcaceae, g__Solibacillus, s__	2	0	0	0	0	0	0	0	0	0	0	0	0	0	0	0	0	0	0	0	0	0	0	0	0	0	0	0	0	0	0	0	0	0	2	0	0	0	0	0	0	0	0	0	0	GTGCCAGCAGCCGCGGTAATACGTAGGTGGCAAGCGTTGTCCGGAATTATTGGGCGTAAAGCGCGCGCAGGTGGTTTCTTAAGTCTGATGTGAAAGCCCCCGGCTCAACCGGGGAGGGTCATTGGAAACTGGGAGACTTGAGTGCAGAAGA
g__Comamonas, 295086	k__Bacteria, p__Proteobacteria, c__Betaproteobacteria, o__Burkholderiales, f__Comamonadaceae, g__Comamonas, s__	11	0	0	0	0	0	8	0	0	0	0	0	0	0	0	0	0	0	0	0	0	0	0	0	0	3	0	0	0	0	0	0	0	0	0	0	0	0	0	0	0	0	0	0	0	AGCAGCCGCGGTAATACGTAGGGTGCAAGCGTTAATCGGAATTACTGGGCGTAAAGCGTGCGCAGGCGGTTTTGTAAGACAGAGGTGAAATCCCCGGGCTCAACCTGGGAACTGCCTTTGTGACTGCAAGGCTAGAGTACGGCAGAGG
g__Acinetobacter, 294782	k__Bacteria, p__Proteobacteria, c__Gammaproteobacteria, o__Pseudomonadales, f__Moraxellaceae, g__Acinetobacter, s__	5	0	0	0	0	0	0	0	0	0	0	0	0	0	0	0	0	0	0	0	0	0	0	0	0	0	1	0	0	0	0	1	0	0	0	1	0	0	1	0	0	0	0	1	0	GTGCCAGCAGCCGCGGTAATACAGAGGGTGCGAGCGTTAATCGGATTTACTGGGCGTAAAGCGCGCGTAGGCGGCTTTTTAAGTCGGATGTGAAATCCCCGAGCTTAACTTGGGAATTGCATTCGATACTGGTAAGCTAGAGTATGGGAGAG
s__kestanbolensis, 294682	k__Bacteria, p__Firmicutes, c__Bacilli, o__Bacillales, f__Bacillaceae, g__Anoxybacillus, s__kestanbolensis	25	0	0	0	0	0	0	0	0	0	0	0	0	0	0	0	0	0	0	0	0	0	0	0	0	0	0	0	0	0	0	0	0	0	0	0	0	0	0	0	25	0	0	0	0	GTGCCAGCAGCCGCGGTAATACGTAGGTGGCAAGCGTTGTCCGGAATTATTGGGCGTAAAGCGCGCGCAGGCGGTTCCTTAAGTCTGATGTGAAAGCCCACGGCTCAACCGTGGAGGGTCATTGGAAACTGGGGGACTTGAGTGCAGAAGA
f__Burkholderiaceae, 287984	k__Bacteria, p__Proteobacteria, c__Betaproteobacteria, o__Burkholderiales, f__Burkholderiaceae, g__, s__	5	0	0	0	0	0	0	0	0	0	0	0	0	0	0	0	0	0	0	0	0	0	0	0	0	0	0	0	2	0	0	0	0	0	3	0	0	0	0	0	0	0	0	0	0	GTGCCAGCAGCCGCGGTAATACGTAGGGTGCGAGCGTTAATCGGAATTACTGGGCGTAAAGCGTGCGCAGGCGGTTTTGTAAGACAGATGTGAAATCCCCGGGCTTAACCTGGGAACTGCATTTGTGACTGCAAGGCTAGAGTATGGCAGA
f__Comamonadaceae, 287179	k__Bacteria, p__Proteobacteria, c__Betaproteobacteria, o__Burkholderiales, f__Comamonadaceae, g__, s__	15	0	0	0	0	0	1	0	0	0	0	0	0	0	0	0	0	14	0	0	0	0	0	0	0	0	0	0	0	0	0	0	0	0	0	0	0	0	0	0	0	0	0	0	0	GCAGCCGCGGTAATACGTAGGGTGCGAGCGTTAATCGGAATTACTGGGCGTAAAGCGTGCGCAGGCGGCTTTGCAAGACAGATGTGAAATCCCCGGGCTCAACCTGGGAACTGCATTTGTGACTGCAAGGCTAGAGTGCGGCAGAGG
f__Xanthomonadaceae, 284308	k__Bacteria, p__Proteobacteria, c__Gammaproteobacteria, o__Xanthomonadales, f__Xanthomonadaceae, g__, s__	56	0	0	0	0	0	0	0	0	0	0	0	0	0	0	0	0	0	0	0	0	0	0	1	0	13	7	0	0	0	0	4	2	0	0	0	0	19	4	0	0	1	0	2	3	GTGCCAGCAGCCGCGGTAATACGAAGGGTGCAAGCGTTACTCGGAATTACTGGGCGTAAAGCGTGCGTAGGTGGTCGTTTAAGTCCGTTGTGAAAGCCCTGGGCTCAACCTGGGAACTGCAGTGGATACTGGACGACTAGAGTGTGGTAGA
f__Enterobacteriaceae, 284014	k__Bacteria, p__Proteobacteria, c__Gammaproteobacteria, o__Enterobacteriales, f__Enterobacteriaceae, g__, s__	2	0	1	0	1	0	0	0	0	0	0	0	0	0	0	0	0	0	0	0	0	0	0	0	0	0	0	0	0	0	0	0	0	0	0	0	0	0	0	0	0	0	0	0	0	GCAGCCGCGGTAATACGGAGGGTGCAAGCGTTAATCGGAATTACTGGGCGTAAAGCGCACGCAGGCGGTTTGTTAAGTCAGATGTGAAATCCCCGGGCTCAACCTGGGAACTGCTTCTGAAACTGGAAAGCTTGAGTCTCGTAGAGG
s__rhizophila, 283765	k__Bacteria, p__Actinobacteria, c__Actinobacteria, o__Actinomycetales, f__Micrococcaceae, g__Kocuria, s__rhizophila	4	0	0	0	0	0	0	0	0	0	0	0	0	0	0	0	0	0	0	0	0	0	0	0	0	4	0	0	0	0	0	0	0	0	0	0	0	0	0	0	0	0	0	0	0	GTGCCAGCAGCCGCGGTAATACGTAGGGCGCAAGCGTTGTCCGGAATTATTGGGCGTAAAGAGCTCGTAGGCGGTTTGTCGCGTCTGCTGTGAAAGCCCGGGGCTTAACCCCGGGTGTGCAGTGGGTACGGGCAGACTTGAGTGCAGTAGG
f__Enterobacteriaceae, 281015	k__Bacteria, p__Proteobacteria, c__Gammaproteobacteria, o__Enterobacteriales, f__Enterobacteriaceae, g__, s__	12	1	1	2	4	0	0	1	0	0	0	0	0	0	0	0	1	0	0	0	1	0	1	0	0	0	0	0	0	0	0	0	0	0	0	0	0	0	0	0	0	0	0	0	0	AGCAGCCGCGGTAATACGGAGGGTGCAAGCGTTAATCGGAATTACTGGGCGTAAAGCGCACGCAGGCGGTTTGTTAAGTCGGATGTGAAATCCCCGGGCTCAACCTGGGAACTGCATTCGAAACTGGCAAGCTTGAGTCTTGTAGAGG
g__Tepidimonas, 280799	k__Bacteria, p__Proteobacteria, c__Betaproteobacteria, o__Burkholderiales, f__Comamonadaceae, g__Tepidimonas, s__	127	0	0	0	0	0	0	0	0	0	0	0	0	0	0	0	0	0	0	0	0	0	0	0	0	5	2	0	0	0	0	0	0	0	0	0	1	0	51	0	68	0	0	0	0	GTGCCAGCAGCCGCGGTAATACGTAGGGTGCGAGCGTTAATCGGAATTACTGGGCGTAAAGCGTGCGCAGGCGGTCTTGTAAGACAGAGGTGAAATCCCTGGGCTCAACCTAGGAATGGCCTTTGTGACTGCAAGGCTGGAGTGCGGCAGA
f__Gemmataceae, 279355	k__Bacteria, p__Planctomycetes, c__Planctomycetia, o__Gemmatales, f__Gemmataceae, g__, s__	11	0	0	0	0	0	0	0	0	0	0	0	0	0	0	0	0	0	0	0	0	0	0	0	0	9	0	0	0	0	0	0	0	0	2	0	0	0	0	0	0	0	0	0	0	GTGGCAGCAGCCGCGGTAAGACGAACCGTGCAAACGTTATTCGGAATCACTGGGCATAAGGGCGCGTAGGCGGCTCCAAAAGTCAGGGGTGAAATCCGGCAGCTTAACTGTCGCAGTGCCTTTGATACTGTGGAGCTAGAGGGAGGTAGG
g__Rhodobacter, 278225	k__Bacteria, p__Proteobacteria, c__Alphaproteobacteria, o__Rhodobacterales, f__Rhodobacteraceae, g__Rhodobacter, s__	747	0	0	0	0	0	2	0	0	0	0	0	0	30	1	0	0	611	0	0	0	0	0	53	0	0	0	0	0	0	0	0	0	0	0	0	0	0	0	50	0	0	0	0	0	AGCAGCCGCGGTAATACGGAGGGGGCTAGCGTTATTCGGAATTACTGGGCGTAAAGCGCACGTAGGCGGATTAGAAAGTCAGAGGTGAAATCCCAGGGCTCAACCTTGGAACTGCCTTTGAAACTCCTAGTCTTGAGGTCGAGAGAGGT
g__Methylibium, 277521	k__Bacteria, p__Proteobacteria, c__Betaproteobacteria, o__Burkholderiales, f__Comamonadaceae, g__Methylibium, s__	1348	0	1	0	0	0	282	0	12	50	0	0	6	0	0	0	0	0	0	52	0	20	0	10	9	0	0	17	243	14	2	2	0	0	624	0	3	0	0	1	0	0	0	0	0	GTGCCAGCAGCCGCGGTAATACGTAGGGTGCAAGCGTTAATCGGAATTACTGGGCGTAAAGCGTGCGCAGGCGGCTTTGCAAGACAGATGTGAAATCCCCGGGCTCAACCTGGGAACTGCATTTGTGACTGCATGGCTAGAGTGCGGCAGAG
f__Beijerinckiaceae, 274150	k__Bacteria, p__Proteobacteria, c__Alphaproteobacteria, o__Rhizobiales, f__Beijerinckiaceae, g__, s__	27	0	0	0	0	0	0	0	0	0	0	0	0	0	0	0	0	0	0	0	0	0	27	0	0	0	0	0	0	0	0	0	0	0	0	0	0	0	0	0	0	0	0	0	0	GCAGCCGCGGTAATACGAAGGGGGCTAGCGTTGCTCGGAATCACTGGGCGTAAAGGGCGCGTAGGCGGACTTTTAAGTCAGGGGTGAAAGCCCAAGGCTCAACCTTGGAACTGCCTTTGATACTGAAAGTCTTGAGACCGGAAGAGG
g__Kaistia, 269781	k__Bacteria, p__Proteobacteria, c__Alphaproteobacteria, o__Rhizobiales, f__Rhizobiaceae, g__Kaistia, s__	341	0	0	0	0	0	339	0	0	0	0	0	2	0	0	0	0	0	0	0	0	0	0	0	0	0	0	0	0	0	0	0	0	0	0	0	0	0	0	0	0	0	0	0	0	AGCAGCCGCGGTAATACGAAGGGGGCTAGCGTTGTTCGGAATTACTGGGCGTAAAGCGTACGTAGGCGGATTGTTAAGTGAGGGGTGAAATCCCGAGGCTCAACCTCGGAACTGCCTTTCATACTGGCAATCTTGAGTCCGGGAGAGGT
g__Sphingobium, 265922	k__Bacteria, p__Proteobacteria, c__Alphaproteobacteria, o__Sphingomonadales, f__Sphingomonadaceae, g__Sphingobium, s__	2	0	0	0	0	0	0	0	0	0	0	0	0	0	0	0	0	0	0	0	0	0	0	2	0	0	0	0	0	0	0	0	0	0	0	0	0	0	0	0	0	0	0	0	0	GTGCCAGCAGCCGCGGTAATACGGGGGGAGCTAGCGTTGTTCGGAATTACTGGGCGTAAAGCGCACGTAGGCGGCTATTCAAGTCAGAGGTGAAAGCCCGGGGCTCAACCCCGGAACTGCCTTTGAAACTAGATAGCTTGAATCCAGGAGA
f__Methylophilaceae, 264560	k__Bacteria, p__Proteobacteria, c__Betaproteobacteria, o__Methylophilales, f__Methylophilaceae, g__, s__	6	0	0	0	0	0	0	0	0	0	0	0	0	0	0	0	0	6	0	0	0	0	0	0	0	0	0	0	0	0	0	0	0	0	0	0	0	0	0	0	0	0	0	0	0	GCAGCCGCGGTAATACGTAGGGTGCGAGCGTTAATCGGAATTACTGGGCGTAAAGCGAGCGCAGGCGGTTTTGTAAGCCAGATGTGAAATCCCCGGGCTCAACCTGGGAACTGCGTTTGGAACTGCAAGGCTAGAGTGTGTCAGAGG
s__maritypicum, 264482	k__Bacteria, p__Actinobacteria, c__Actinobacteria, o__Actinomycetales, f__Microbacteriaceae, g__Microbacterium, s__maritypicum	350	0	0	0	0	0	0	0	0	0	0	0	0	0	0	0	0	7	0	0	0	0	0	142	0	0	1	23	15	0	0	0	4	0	5	0	0	0	0	147	0	3	1	2	0	GTGCCAGCAGCCGCGGTAATACGTAGGGCGCAAGCGTTATCCGGAATTATTGGGCGTAAAGAGCTCGTAGGCGGTTTGTCGCGTCTGCTGTGAAATCCGGAGGCTCAACCTCCGGCCTGCAGTGGGTACGGGCAGACTAGAGTGCGGTAGGG
o__Streptophyta, 262379	k__Bacteria, p__Cyanobacteria, c__Chloroplast, o__Streptophyta, f__, g__, s__	20	0	0	0	0	0	0	0	0	0	20	0	0	0	0	0	0	0	0	0	0	0	0	0	0	0	0	0	0	0	0	0	0	0	0	0	0	0	0	0	0	0	0	0	0	GTGCCAGCAGCCGCGGTAATACAGAGGATGCAAGCGTTATCCGGAATGATTGGGCGTAAAGCGTCTGTAGGTGGCTTTTTAAGTCCGCCGTCAAATCCCAGGGCTCAACCCTGGACAGGCGGTGGAAACTACCAAGCTGGAGTACGGTAGGG
g__Hyphomicrobium, 260794	k__Bacteria, p__Proteobacteria, c__Alphaproteobacteria, o__Rhizobiales, f__Hyphomicrobiaceae, g__Hyphomicrobium, s__	16	0	0	0	0	0	0	0	0	0	0	0	0	0	0	0	0	0	0	0	0	0	0	0	0	0	0	0	0	0	0	0	0	0	0	0	0	0	0	0	16	0	0	0	0	GTGCCAGCAGCCGCGGTAATACGAAGGGAGCTAGCGTTGTTCGGAATCACTGGGCGTAAAGCGCACGTAGGCGGATTTGTTAGTCAGGGGTGAAATCCCGGGGCTCAACCTCGGAACTGCCTTTGATACTGCAAGTCTGGAGTCCGGAAGA
g__Chryseobacterium, 258175	k__Bacteria, p__Bacteroidetes, c__Flavobacteriia, o__Flavobacteriales, f__[Weeksellaceae], g__Chryseobacterium, s__	484	18	0	0	0	0	16	0	0	0	0	0	2	0	0	0	0	0	0	0	0	0	0	10	0	10	42	0	261	4	0	0	4	1	9	63	17	3	9	12	0	1	1	1	0	GTGCCAGCAGCCGCGGTAATACGGAGGGTGCAAGCGTTATCCGGATTTATTGGGTTTAAAGGGTCCGTAGGCGGATCTGTAAGTCAGTGGTGAAATCTCACAGCTTAACTGTGAAACTGCCATTGATACTGCAGGTCTTGAGTGTTGTTGAA
f__Oxalobacteraceae, 256121	k__Bacteria, p__Proteobacteria, c__Betaproteobacteria, o__Burkholderiales, f__Oxalobacteraceae, g__, s__	3	0	0	0	0	0	0	0	0	0	0	0	0	0	0	0	0	3	0	0	0	0	0	0	0	0	0	0	0	0	0	0	0	0	0	0	0	0	0	0	0	0	0	0	0	GCAGCCGCGGTAATACGTAGGGTGCAAGCGTTAATCGGAATTACTGGGCGTAAAGCGTGCGCAGGCGGTTATGTAAGACAGATGTGAAATCCCCGGGCTTAACCTGGGAACTGCATTTGTGACTGCATGGCTAGAGTGTGTCAGAGGG
g__Phenylobacterium, 254401	k__Bacteria, p__Proteobacteria, c__Alphaproteobacteria, o__Caulobacterales, f__Caulobacteraceae, g__Phenylobacterium, s__	68	0	0	0	0	0	0	0	0	0	0	0	0	0	0	0	0	0	0	0	0	0	0	0	0	0	0	0	19	2	0	4	4	0	0	0	18	21	0	0	0	0	0	0	0	GTGCCAGCAGCCGCGGTAATACGAAGGGGGCTAGCGTTGCTCGGAATTACTGGGCGTAAAGGGCGCGTAGGCGGACAGTTTAGTCAGAGGTGAAAGCCCAGGGCTCAACCTTGGAATTGCCTTTGATACTGGCTGTCTTGAGTTCGGGAGA
f__Comamonadaceae, 254138	k__Bacteria, p__Proteobacteria, c__Betaproteobacteria, o__Burkholderiales, f__Comamonadaceae, g__, s__	3	0	0	0	0	0	1	0	0	0	0	0	0	0	0	0	0	2	0	0	0	0	0	0	0	0	0	0	0	0	0	0	0	0	0	0	0	0	0	0	0	0	0	0	0	GCAGCCGCGGTAATACGTAGGGTGCGAGCGTTAATCGGAATTACTGGGCGTAAAGCGTGCGCAGGCGGTGATGTAAGACAGATGTGAAATCCCCGGGCTCAACTTGGGAACTGCATTTGTGACTGCATCGCTGGAGTGCGGCAGAGG
s__gelatinosus, 252876	k__Bacteria, p__Proteobacteria, c__Betaproteobacteria, o__Burkholderiales, f__Comamonadaceae, g__Rubrivivax, s__gelatinosus	28	0	0	0	0	0	14	0	0	0	0	0	2	0	0	0	0	11	0	0	0	0	1	0	0	0	0	0	0	0	0	0	0	0	0	0	0	0	0	0	0	0	0	0	0	AGCAGCCGCGGTAATACGTAGGGTGCAAGCGTTAATCGGAATTACTGGGCGTAAAGCGTGCGCAGGCGGTTTTGTAAGACAGAGGTGAAATCCCCGGGCTCAACCTGGGAACTGCCTTTGTGACTGCAAGGCTTGAGTGCGGCAGAGGG
f__Comamonadaceae, 251465	k__Bacteria, p__Proteobacteria, c__Betaproteobacteria, o__Burkholderiales, f__Comamonadaceae, g__, s__	3	0	0	0	0	0	3	0	0	0	0	0	0	0	0	0	0	0	0	0	0	0	0	0	0	0	0	0	0	0	0	0	0	0	0	0	0	0	0	0	0	0	0	0	0	GCAGCCGCGGTAATACGTAGGGTGCGAGCGTTAATCGGAATTACTGGGCGTAAAGCGTGCGCAGGCGGTTGTGCAAGACAGGTGTGAAATCCCCGGGCTTAACCTGGGAACTGCACTTGTGACTGCACGGCTAGAGTACGGCAGAGG
g__Leptothrix, 250274	k__Bacteria, p__Proteobacteria, c__Betaproteobacteria, o__Burkholderiales, f__Comamonadaceae, g__Leptothrix, s__	3	0	0	0	0	0	0	0	0	0	0	0	3	0	0	0	0	0	0	0	0	0	0	0	0	0	0	0	0	0	0	0	0	0	0	0	0	0	0	0	0	0	0	0	0	GCAGCCGCGGTAATACGTAGGGTGCAAGCGTTAATCGGAATTACTGGGCGTAAAGCGTGCGCAGGCGGTCTTGTAAGACAGAGGTGAAATCCCCGGGCTCAACCTGGGAACTGCCTTTGTGACTGCAAGGCTTGAGTACGGTAGAGG
g__Agrobacterium, 250206	k__Bacteria, p__Proteobacteria, c__Alphaproteobacteria, o__Rhizobiales, f__Rhizobiaceae, g__Agrobacterium, s__	15	0	0	0	0	0	1	0	0	0	0	0	0	0	0	0	0	12	0	0	0	0	0	0	0	0	0	0	0	0	0	0	0	0	0	0	0	0	0	2	0	0	0	0	0	AGCAGCCGCGGTAATACGAAGGGGGCTAGCGTTGTTCGGAATTACTGGGCGTAAAGCGCACGTAGGCGGGTATTTAAGTCAGGGGTGAAATCCCAGAGCTCAACTCTGGAACTGCCTTTGATACTGGGTATCTTGAGTATGGAAGAGGT
g__Acinetobacter, 250135	k__Bacteria, p__Proteobacteria, c__Gammaproteobacteria, o__Pseudomonadales, f__Moraxellaceae, g__Acinetobacter, s__	18	0	0	1	0	0	0	0	0	0	0	0	0	0	0	0	0	6	0	0	0	0	0	0	0	2	1	0	1	1	0	0	5	0	0	0	0	0	0	1	0	0	0	0	0	CTGTGCCAGCAGCCGCGGTAATACAGAGGGTGCGAGCGTTAATCGGATTTACTGGGCGTAAAGCGTGCGTAGGCGGCTTTTTAAGTCGGATGTGAAATCCCCGAGCTTAACTTGGGAATTGCATTCGATACTGGGAAGCTAGAGTATGGGCAGAGG
s__organophilum, 250112	k__Bacteria, p__Proteobacteria, c__Alphaproteobacteria, o__Rhizobiales, f__Methylobacteriaceae, g__Methylobacterium, s__organophilum	2	0	0	0	0	0	0	0	0	0	0	0	0	0	0	0	0	0	0	0	0	0	0	0	0	0	2	0	0	0	0	0	0	0	0	0	0	0	0	0	0	0	0	0	0	GTGCCAGCAGCCGCGGTAATACGAAGGGGGCTAGCGTTGCTCGGAATCACTGGGCGTAAAGGGCGCGTAGGCGGTCTTTTAAGTCGGGGGTGAAAGCCTGTGGCTCAACCACAGAATTGCCTTCGATACTGGGAGACTTGAGTTCGGAAGA
g__Kaistobacter, 249385	k__Bacteria, p__Proteobacteria, c__Alphaproteobacteria, o__Sphingomonadales, f__Sphingomonadaceae, g__Kaistobacter, s__	4	0	0	0	0	0	0	0	0	0	0	0	0	0	0	0	0	0	0	0	0	0	0	0	0	0	0	0	0	0	0	0	0	0	0	0	0	4	0	0	0	0	0	0	0	GTGCCAGCAGCCGCGGTAATACGAAGGGGGCTAGCGTTGCTCGGAATCACTGGGCGTAAAGGGTGCGTAGGCGGGTCTTTAAGTCAGGGGTGAAATCCTGGAGCTCAACTCCAGAACTGCCTTTGATACTGAGGATCTTGAGTATGGGAGA
g__Kribbella, 247758	k__Bacteria, p__Actinobacteria, c__Actinobacteria, o__Actinomycetales, f__Nocardioidaceae, g__Kribbella, s__	8	0	0	0	0	0	0	0	0	0	0	0	0	0	0	0	0	0	0	0	0	0	0	0	0	0	0	0	0	0	0	0	0	0	0	0	8	0	0	0	0	0	0	0	0	GTGCCAGCAGCCGCGGTAATACGTAGGGTCCGAGCGTTGTCCGGAATTATTGGGCGTAAAGGGCTCGTAGGCGGTTCGTCACGTCGGGAGTGAAAACTCGGAGCTCAACTCCGAGCCTGCTTCCGATACGGGCAGACTAGAGGTAGGCAGG
g__Acinetobacter, 247695	k__Bacteria, p__Proteobacteria, c__Gammaproteobacteria, o__Pseudomonadales, f__Moraxellaceae, g__Acinetobacter, s__	13835	0	0	0	0	0	23	0	0	0	1	0	1	0	14	0	105	2641	43	0	0	0	1	334	211	871	992	600	472	1099	108	1882	1460	495	327	452	135	526	484	69	189	25	13	4	258	TGTGCCAGCAGCCGCGGTAATACAGAGGGTGCGAGCGTTAATCGGATTTACTGGGCGTAAAGCGTGCGTAGGCGGCTGATTAAGTCGGATGTGAAATCCCTGAGCTTAACTTAGGAATTGCATTCGATACTGGTCAGCTAGAGTATGGGAGAG
f__Comamonadaceae, 246739	k__Bacteria, p__Proteobacteria, c__Betaproteobacteria, o__Burkholderiales, f__Comamonadaceae, g__, s__	4	0	0	0	0	0	3	0	0	0	0	0	1	0	0	0	0	0	0	0	0	0	0	0	0	0	0	0	0	0	0	0	0	0	0	0	0	0	0	0	0	0	0	0	0	GCAGCCGCGGTAATACGTAGGGTGCGAGCGTTAATCGGAATTACTGGGCGTAAAGCGTGCGCAGGCGGTTATGCAAGACAGATGTGAAATCCCCGGGCTCAACCTGGGAACTGCATTAGTGACTGCATAGCTAGAGTGCGGCAGAGG
g__Mycobacterium, 246078	k__Bacteria, p__Actinobacteria, c__Actinobacteria, o__Actinomycetales, f__Mycobacteriaceae, g__Mycobacterium, s__	16	0	0	0	0	0	0	0	0	0	0	0	0	0	0	0	0	0	0	0	0	0	0	0	0	0	16	0	0	0	0	0	0	0	0	0	0	0	0	0	0	0	0	0	0	GTGCCAGCAGCCGCGGTAATACGTAGGGTGCGAGCGTTGTCCGGAATTACTGGGCGTAAAGAGCTCGTAGGTGGTTTGTCGCGTTGTTCGTGAAAACTCACAACTCAATTGTGGGCGTGCGGGCGATACGGGCAGACTGGAGTACTGCAGG
g__Paenibacillus, 245552	k__Bacteria, p__Firmicutes, c__Bacilli, o__Bacillales, f__Paenibacillaceae, g__Paenibacillus, s__	65	0	0	65	0	0	0	0	0	0	0	0	0	0	0	0	0	0	0	0	0	0	0	0	0	0	0	0	0	0	0	0	0	0	0	0	0	0	0	0	0	0	0	0	0	AGCAGCCGCGGTAATACGTAGGGGGCAAGCGTTGTCCGGAATTATTGGGCGTAAAGCGCGCGCAGGCGGTTCTTTAAGTCTGGTGTTTAAACCCGGAGCTTAACTTCGGGACGCACTGGAAACTGGGGGACTTGAGTGCAGAAGAGGA
f__Bradyrhizobiaceae, 245495	k__Bacteria, p__Proteobacteria, c__Alphaproteobacteria, o__Rhizobiales, f__Bradyrhizobiaceae, g__, s__	2	0	0	0	0	0	0	0	0	0	0	0	0	0	0	0	0	2	0	0	0	0	0	0	0	0	0	0	0	0	0	0	0	0	0	0	0	0	0	0	0	0	0	0	0	GCAGCCGCGGTAATACGAAGGGGGCTAGCGTTGCTCGGAATCACTGGGCGTAAAGGGTGCGTAGGCGGATCTTTAAGTCAGAGGTGAAAGCCTGGAGCTCAACTCCAGAACTGCCTTTGATACTGAGGATCTTGAGTTCGGGAGAGG
g__Lysobacter, 245194	k__Bacteria, p__Proteobacteria, c__Gammaproteobacteria, o__Xanthomonadales, f__Xanthomonadaceae, g__Lysobacter, s__	3	0	0	0	0	0	0	0	0	0	0	0	0	0	0	0	0	0	0	0	0	0	0	0	0	0	0	0	0	0	0	0	0	0	0	0	3	0	0	0	0	0	0	0	0	GTGCCAGCAGCCGCGGTAATACGAAGGGTGCAAGCGTTACTCGGAATTACTGGGCGTAAAGCGTGCGTAGGTGGTTTGTTAAGTCTGATGTGAAAGCCCTGGGCTCAACCTGGGAATGGCATTGGAAACTGGCTTACTAGAGTGCGGTAGA
f__Pseudomonadaceae, 244248	k__Bacteria, p__Proteobacteria, c__Gammaproteobacteria, o__Pseudomonadales, f__Pseudomonadaceae, g__, s__	77	0	0	0	0	0	0	0	0	0	0	0	0	0	0	0	0	36	0	0	0	0	0	0	0	0	8	0	3	1	9	11	8	1	0	0	0	0	0	0	0	0	0	0	0	GTGCCAGCAGCCGCGGTAATACGGAGGGTGCGAGCGTTAATCGGAATTACTGGGCGTAAAGCGCGCGTAGGTGGTTCGTTAAGTTGGATGTGAAAGCCCCGGGCTCAACCTGGGAACTGCATCCAAAACTGGCGAGCTAGAGTACGGTAGAG
o__Sphingobacteriales, 242136	k__Bacteria, p__Bacteroidetes, c__Sphingobacteriia, o__Sphingobacteriales, f__, g__, s__	20	0	0	0	0	0	0	0	0	0	0	0	0	0	0	1	0	1	0	0	0	0	0	0	2	11	1	0	1	0	0	0	0	2	1	0	0	0	0	0	0	0	0	0	0	GTGCCAGCAGCCGCGGTAAGACGAAGGATGCAAGCGTTATCCGGATTCATTGGGTTTAAAGGGTGCGTAGGCGGACTTGTAAGTCAGTGGTGAAATCTCTCAGCTTAACTGAGAAACTGCCATTGATACTGCAGGTCTAGAGTATAGATGAC
o__Rhizobiales, 241449	k__Bacteria, p__Proteobacteria, c__Alphaproteobacteria, o__Rhizobiales, f__, g__, s__	25010	0	227	769	739	221	2405	2	227	434	185	80	48	450	616	61	1670	9297	422	734	275	243	163	1967	11	64	110	51	290	109	51	115	89	35	2221	11	11	31	48	458	27	8	6	4	25	AGCAGCCGCGGTAATACGAAGGGGGCTAGCGTTGCTCGGAATCACTGGGCGTAAAGGGCGCGTAGGCGGACTTTTAAGTCGGAGGTGAAAGCCCAGGGCTCAACCCTGGAATTGCCTTCGATACTGGGAGTCTTGAGTTCGGAAGAGGT
f__Sphingomonadaceae, 240173	k__Bacteria, p__Proteobacteria, c__Alphaproteobacteria, o__Sphingomonadales, f__Sphingomonadaceae, g__, s__	24	0	0	0	0	0	0	0	0	0	0	0	0	0	0	0	0	0	0	0	0	0	0	0	0	3	0	7	0	0	0	0	0	0	1	0	11	0	0	0	0	0	0	0	2	GTGCCAGCAGCCGCGGTAATACGGAGGGGGCTAGCGTTGTTCGGAATTACTGGGCGTAAAGCGCACGTAGGCGGCTTTGTAAGTTAGAGGTGAAAGCCTGGAGCTCAACTCCAGAATTGCCTTTAAGACTGCATCGCTTGAATCCAGGAGA
g__Flavobacterium, 240032	k__Bacteria, p__Bacteroidetes, c__Flavobacteriia, o__Flavobacteriales, f__Flavobacteriaceae, g__Flavobacterium, s__	3638	0	86	0	0	0	183	0	0	0	0	0	9	0	0	0	0	199	0	0	0	0	0	1422	0	2	14	7	201	0	0	6	0	0	17	0	0	0	0	1463	3	4	4	12	6	CGTGCCAGCAGCCGCGGTAATACGGAGGATCCAAGCGTTATCCGGAATCATTGGGTTTAAAGGGTCTGTAGGCGGTCTTGTAAGTCAGTGGTGAAAGCCCATCGCTCAACGGTGGAACGGCCATTGATACTGCTGGACTTGAATTATTGGGAA
s__citronellolis, 239924	k__Bacteria, p__Proteobacteria, c__Gammaproteobacteria, o__Pseudomonadales, f__Pseudomonadaceae, g__Pseudomonas, s__citronellolis	3517	2	146	388	93	129	75	112	10	710	134	168	0	123	45	0	278	30	420	12	90	107	155	0	77	38	29	6	3	0	6	7	1	3	3	4	23	17	43	10	13	2	3	2	0	AGCAGCCGCGGTAATACGAAGGGTGCAAGCGTTAATCGGAATTACTGGGCGTAAAGCGCGCGTAGGTGGTTTGGTAAGATGGATGTGAAATCCCCGGGCTCAACCTGGGAACTGCATCCATAACTGCCTGACTAGAGTACGGTAGAGGG
g__Gordonia, 239824	k__Bacteria, p__Actinobacteria, c__Actinobacteria, o__Actinomycetales, f__Gordoniaceae, g__Gordonia, s__	157	0	1	0	0	0	130	0	0	0	0	0	6	20	0	0	0	0	0	0	0	0	0	0	0	0	0	0	0	0	0	0	0	0	0	0	0	0	0	0	0	0	0	0	0	AGCAGCCGCGGTAATACGTAGGGTGCGAGCGTTGTCCGGAATTACTGGGCGTAAAGAGCTCGTAGGCGGTTTGTCGCGTCGTCTGTGAAATTCTGCAGCTTAACTGCAGGCGTGCAGGCGATACGGGCAGACTTGAGTACTACAGGGGA
g__Hyphomicrobium, 239537	k__Bacteria, p__Proteobacteria, c__Alphaproteobacteria, o__Rhizobiales, f__Hyphomicrobiaceae, g__Hyphomicrobium, s__	9	0	0	0	0	0	6	0	0	0	0	0	0	0	0	0	0	3	0	0	0	0	0	0	0	0	0	0	0	0	0	0	0	0	0	0	0	0	0	0	0	0	0	0	0	GCAGCCGCGGTAATACGAAGGGGACTAGCGTTGTTCGGAATCACTGGGCGTAAAGCGCACGTAGGCGGATTTGTAAGTCAGGGGTGAAATCCCGGGGCTCAACCTCGGAACTGCCTTTGATACTGCGAATCTTGAGTCCGATAGAGG
f__Rhodocyclaceae, 239128	k__Bacteria, p__Proteobacteria, c__Betaproteobacteria, o__Rhodocyclales, f__Rhodocyclaceae, g__, s__	37	0	0	0	0	0	4	0	0	0	0	0	0	0	0	0	0	32	1	0	0	0	0	0	0	0	0	0	0	0	0	0	0	0	0	0	0	0	0	0	0	0	0	0	0	GCAGCCGCGGTAATACGTAGGGTGCGAGCGTTAATCGGAATTACTGGGCGTAAAGCGTGCGCAGGCGGTTTTGTAAGACAGATGTGAAATCCCCGGGCTCAACCTGGGAACTGCATTTGTGACTGCAAGGCTAGAGTATGGCAGAGG
f__Comamonadaceae, 239044	k__Bacteria, p__Proteobacteria, c__Betaproteobacteria, o__Burkholderiales, f__Comamonadaceae, g__, s__	4	0	0	0	0	0	0	0	0	0	0	0	0	0	0	0	0	0	0	0	0	0	0	0	0	0	0	0	0	0	0	0	0	0	4	0	0	0	0	0	0	0	0	0	0	GTGCCAGCAGCCGCGGTAATACGTAGGTGCGAGCGTTAATCGGAATTACTGGGCGTAAAGCGTGCGCAGGCGGTGATGTAAGACAGATGTGAAATCCCCGGGCTCAACCTGGGACCTGCATTTGTGACTGCATCGCTAGAGTACGGCAGAG
f__Tsukamurellaceae, 236778	k__Bacteria, p__Actinobacteria, c__Actinobacteria, o__Actinomycetales, f__Tsukamurellaceae, g__, s__	5	0	0	0	0	0	0	0	0	0	0	0	0	0	0	0	0	0	0	0	0	0	0	0	0	0	0	0	3	0	0	0	0	0	0	0	0	0	0	2	0	0	0	0	0	GTGCCAGCAGCCGCGGTAATACGTAGGGTGCGAGCGTTGTCCGGAATTACTGGGCGTAAAGAGCTCGTAGGTGGTTTGTCGCGTCGTCCGTGAAAACTTGGGGCTTAACCCCAAGCTTGCGGGCGATACGGGCAGACTTGAGTACTGCAGG
f__Enterobacteriaceae, 236142	k__Bacteria, p__Proteobacteria, c__Gammaproteobacteria, o__Enterobacteriales, f__Enterobacteriaceae, g__, s__	11	1	1	1	0	0	0	0	0	0	0	0	0	2	0	0	2	0	2	0	0	0	2	0	0	0	0	0	0	0	0	0	0	0	0	0	0	0	0	0	0	0	0	0	0	GCAGCCGCGGTAATACGGAGGGTGCAAGCGTTAATCGGAATTACTGGGCGTAAAGCGCACGCAGGCGGTTTGCTAAGTCAGATGTGAAATCCCCGGGCTCAACCTGGGAACTGCATTTGAAACTGGCAAGCTAGAGTCTCGTAGAGG
g__Emticicia, 236066	k__Bacteria, p__Bacteroidetes, c__Cytophagia, o__Cytophagales, f__Cytophagaceae, g__Emticicia, s__	7609	0	0	0	0	0	15	1	0	0	0	0	0	0	0	19	2	2870	2	0	100	21	0	4	0	0	0	0	393	0	0	5	0	0	4165	3	0	2	1	5	0	0	1	0	0	CGTGCCAGCAGCCGCGGTAATACGTAGGTGGCGAGCGTTATCCGGATTTATTGGGTTTAAAGGGAGCGTAGGCGGCTGATTAAGTCAGCGGTGAAAGGTAGCAGCTTAACTGTTTTACATGCCGTTGATACTGGTTAGCTTGAGTTGACAGAA
o__Rickettsiales, 233724	k__Bacteria, p__Proteobacteria, c__Alphaproteobacteria, o__Rickettsiales, f__, g__, s__	53	0	0	0	0	0	0	0	0	0	0	0	0	0	0	0	0	45	0	0	0	0	0	0	0	0	2	0	1	0	0	0	3	0	2	0	0	0	0	0	0	0	0	0	0	AGCAGCCGCGGTAAGACGGAGGGGGCTAGCGTTGTTCGGAATGACTGGGCGTAAAGGGCGCGTAGGCGGTTTTTTAAGTGAGGCGTGAAAGCCCTGGGCTTAACCCAGGAGGTGCGTTTCATACTGGAAGACTTGAGTGCGAGAGAGGA
g__Chryseobacterium, 229949	k__Bacteria, p__Bacteroidetes, c__Flavobacteriia, o__Flavobacteriales, f__[Weeksellaceae], g__Chryseobacterium, s__	6	0	0	0	0	0	0	0	0	0	0	0	0	0	0	0	0	0	0	0	0	0	0	0	0	0	2	0	0	0	0	0	0	0	0	0	4	0	0	0	0	0	0	0	0	AGCAGCCGCGGTAATACGGAGGGTGCAAGCGTTATCCGGATTTATTGGGTTTAAAGGGTCCGTAGGCGGACTCGTAAGTCAGTGGTGAAATCTCATAGCTTAACTATGAAACTGCCATTGATACTGCGGGTCTTGAGTAAGGTAGAGG
s__natatoria, 229434	k__Bacteria, p__Proteobacteria, c__Alphaproteobacteria, o__Sphingomonadales, f__Sphingomonadaceae, g__Blastomonas, s__natatoria	15	0	0	0	0	0	0	0	0	0	0	0	0	0	0	0	0	0	0	0	0	0	0	8	0	0	0	0	0	0	0	0	0	0	4	0	0	0	0	3	0	0	0	0	0	GTGCCAGCAGCCGCGGTAATACGGAGGGAGCTAGCGTTGTTCGGAATTACTGGGCGTAAAGCGCACGTAGGCGGCCATTCAAGTCAGAGGTGAAAGCCCGGGGCTCAACCCCGGAACTGCCTTTGAAACTAGATGGCTTGAATCTTGGAGA
o__Rhizobiales, 226373	k__Bacteria, p__Proteobacteria, c__Alphaproteobacteria, o__Rhizobiales, f__, g__, s__	3	0	0	0	0	0	0	0	0	0	0	0	0	0	0	1	1	1	0	0	0	0	0	0	0	0	0	0	0	0	0	0	0	0	0	0	0	0	0	0	0	0	0	0	0	GCAGCCGCGGTAATACGAAGGGGGCTAGCGTTGCTCGGAATCACTGGGCGTAAAGGGCGCGTAGGCGGACTCTTAAGTCGGGGGTGAAAGCCCAGGGCTCAACCCTGGAATTGCCTTCGATACTGAGAGTCTCGAGTTCGGAAGAGG
g__Pseudomonas, 225284	k__Bacteria, p__Proteobacteria, c__Gammaproteobacteria, o__Pseudomonadales, f__Pseudomonadaceae, g__Pseudomonas, s__	3	0	0	0	0	0	0	0	0	0	0	0	0	0	0	0	0	0	0	0	0	0	0	0	0	0	0	0	0	0	0	3	0	0	0	0	0	0	0	0	0	0	0	0	0	GTGCCAGCAGCCGCGGTAATACGAAGGGTGCAAGCGTTAATCGGAATTACTGGGCGTAAAGCGCGCGTAGGTGGTTCAGCAAGTTGGATGTGAAATCCCCGGGCTCAACCTGGGAACTGCATCCAAAACTACTGAGCTAGAGTACGGTAGA
f__Rhizobiaceae, 225279	k__Bacteria, p__Proteobacteria, c__Alphaproteobacteria, o__Rhizobiales, f__Rhizobiaceae, g__, s__	25	0	0	0	0	0	0	0	0	0	0	0	0	0	0	0	0	25	0	0	0	0	0	0	0	0	0	0	0	0	0	0	0	0	0	0	0	0	0	0	0	0	0	0	0	AGCAGCCGCGGTAATACGAAGGGGGCTAGCGTTGTTCGGAATTACTGGGCGTAAAGCGCACGTAGGCGGATCGATCAGTCAGGGGTGAAATCCCAGAGCTCAACTCTGGAACTGCCTTTGATACTGTCGGTCTAGAGTATGGAAGAGG
g__Runella, 223870	k__Bacteria, p__Bacteroidetes, c__Cytophagia, o__Cytophagales, f__Cytophagaceae, g__Runella, s__	179	0	0	0	1	0	28	0	0	0	1	0	141	1	0	0	0	4	0	3	0	0	0	0	0	0	0	0	0	0	0	0	0	0	0	0	0	0	0	0	0	0	0	0	0	AGCAGCCGCGGTAATACGTAGGTGGCAAGCGTTGTCCGGATTTATTGGGTTTAAAGGGTGCGTAGGTGGTTTGCTAAGTCAGTGGTGAAAGCTGGTTGCTCAACAATCAAGTTGCCATTGATACTGTCAGACTTGAGAGAAGTGGAGG
f__Xanthomonadaceae, 222534	k__Bacteria, p__Proteobacteria, c__Gammaproteobacteria, o__Xanthomonadales, f__Xanthomonadaceae, g__, s__	29	0	0	0	0	0	0	0	0	0	0	0	0	0	0	0	0	0	0	0	0	0	0	0	0	0	3	6	1	0	9	0	0	2	3	0	0	1	0	2	0	2	0	0	0	GTGCCAGCAGCCGCGGTAATACGAAGGGTGCAAGCGTTAATCGGAATTACTGGGCGTAAAGGGTGCGTAGGCGGTTCGTTAAGTCTGTTGTGAAATCCCCGGGCTCAACCTGGGAATGGCAATGGATACTGGCGAGCTAGAGTGTGATAGA
g__Acinetobacter, 219826	k__Bacteria, p__Proteobacteria, c__Gammaproteobacteria, o__Pseudomonadales, f__Moraxellaceae, g__Acinetobacter, s__	74	0	0	0	0	0	0	0	0	0	0	0	0	0	0	0	0	0	56	0	0	0	0	0	0	0	13	0	0	0	0	0	0	0	0	0	0	0	5	0	0	0	0	0	0	AGCAGCCGCGGTAATACAGAGGGTGCGAGCGTTAATCGGATTTACTGGGCGTAAAGCGTGCGTAGGCGGCTTATTAAGTCGGATGTGAAATCCCCGAGCTTAACTTGGGAATTGCATTCGATACTGGTGAGCTAGAGTATGGGAGAGGA
g__Chryseobacterium, 219549	k__Bacteria, p__Bacteroidetes, c__Flavobacteriia, o__Flavobacteriales, f__[Weeksellaceae], g__Chryseobacterium, s__	1309	0	0	0	0	0	0	0	0	0	0	0	0	0	15	0	0	0	0	0	0	0	0	57	1	163	163	61	24	109	4	231	157	58	4	53	0	80	13	77	3	1	0	3	32	GTGCCAGCAGCCGCGGTAATACGGAGGGTGCAAGCGTTATCCGGATTTATTGGGTTTAAAGGGTCCGTAGGCGGATCTGTAAGTCAGTGGTGAAATCTCATAGCTTAACTATGAAACTGCCATTGATACTGCAGGTCTTGAGTAAAGTAGAA
s__leguminosarum, 218446	k__Bacteria, p__Proteobacteria, c__Alphaproteobacteria, o__Rhizobiales, f__Rhizobiaceae, g__Rhizobium, s__leguminosarum	2	0	0	0	0	0	0	0	0	0	0	0	0	2	0	0	0	0	0	0	0	0	0	0	0	0	0	0	0	0	0	0	0	0	0	0	0	0	0	0	0	0	0	0	0	GCAGCCGCGGTAATACGAAGGGGGCTAGCGTTGTTCGGAATTACTGGGCGTAAAGCGCACGTAGGCGGATCGATCAGTCAGGGGTGAAATCCCAGGGCTCAACCCTGGAACTGCCTTTGATACTGTCGATCTGGAGTATGGAAGAGGT
g__Novosphingobium, 218426	k__Bacteria, p__Proteobacteria, c__Alphaproteobacteria, o__Sphingomonadales, f__Sphingomonadaceae, g__Novosphingobium, s__	43	0	0	0	0	0	7	0	0	0	0	0	0	0	0	0	0	36	0	0	0	0	0	0	0	0	0	0	0	0	0	0	0	0	0	0	0	0	0	0	0	0	0	0	0	GCAGCCGCGGTAATACGGAGGGGGCTAGCGTTGTTCGGAATTACTGGGCGTAAAGCGCACGTAGGCGGCTACTCAAGTCAGAGGTGAAAGCCCGGGGCTCAACCCCGGAACTGCCTTTGAAACTAGGTGGCTAGAATCTTGGAGAGGTCA
f__Rhizobiaceae, 218154	k__Bacteria, p__Proteobacteria, c__Alphaproteobacteria, o__Rhizobiales, f__Rhizobiaceae, g__, s__	3	0	0	0	0	0	0	0	0	0	0	0	0	0	0	0	0	3	0	0	0	0	0	0	0	0	0	0	0	0	0	0	0	0	0	0	0	0	0	0	0	0	0	0	0	GCAGCCGCGGTAATACGAAGGGGGCTAGCGTTGTTCGGAATTACTGGGCGTAAAGCGCACGTAGGCGGATATTTAAGTCAGGGGTGAAATCCCAGAGCTCAACTCTGGAACTGCCTTTGATACTGGGTATCTGGAGTATGGAAGAGG
g__Pseudonocardia, 216469	k__Bacteria, p__Actinobacteria, c__Actinobacteria, o__Actinomycetales, f__Pseudonocardiaceae, g__Pseudonocardia, s__	2	0	0	0	0	0	0	0	0	0	0	0	0	0	0	0	0	0	0	0	0	0	0	0	2	0	0	0	0	0	0	0	0	0	0	0	0	0	0	0	0	0	0	0	0	GTGCCAGCAGCCGCGGTAACACGTAGGGTGCGAGCGTTGTCCGGAATTATTGGGCGTAAAGAGCTCGTAGGCGGTGTGTCGCGTCGGCCGTGAAAACTTGGGGCTTAACTCTGAGCGTGCGGTCGATACGGGCATCACTTGAGTTCGGCA
c__Alphaproteobacteria, 213063	k__Bacteria, p__Proteobacteria, c__Alphaproteobacteria, o__, f__, g__, s__	23	0	0	0	0	0	0	0	0	0	0	0	0	0	0	0	0	0	0	0	0	0	0	0	0	11	0	0	0	0	0	0	0	0	0	0	0	0	0	0	11	0	0	1	0	GTGCCAGCAGCCGCGGTAATACGAAGGGGGCTAGCGTTGCTCGGAATCACTGGGCGTAAAGGGTGCGTAGGCGGGTCTTTAAGTCAGGGGTGAAATCCTGGAGCTCAACTCCAGAACTGCCTTTGATACTGAGGATCTTGAGTCCGGGAGA
g__Sediminibacterium, 212724	k__Bacteria, p__Bacteroidetes, c__[Saprospirae], o__[Saprospirales], f__Chitinophagaceae, g__Sediminibacterium, s__	259	0	0	0	0	0	0	0	0	0	0	0	11	0	0	0	0	0	0	0	0	0	0	3	0	9	24	12	1	31	1	37	28	23	0	28	0	23	23	0	0	0	0	1	4	GTGCCAGCAGCCGCGGTAATACGGAGGGTGCAAGCGTTATCCGGATTCACTGGGTTTAAAGGGTGCGTAGGCGGGCAGGTAAGTCAGTGGTGAAATCCTGGAGCTTAACTCCAGAACTGCCATTGATACTATCTGTCTTGAATATTGTGGAG
f__Comamonadaceae, 211171	k__Bacteria, p__Proteobacteria, c__Betaproteobacteria, o__Burkholderiales, f__Comamonadaceae, g__, s__	10	0	0	0	0	0	0	0	0	0	0	0	0	0	0	0	0	0	0	0	0	0	0	0	0	0	0	10	0	0	0	0	0	0	0	0	0	0	0	0	0	0	0	0	0	GTGCCAGCAGCCGCGGTAATACGTAGGGTGCAAGCGTTAATCGGAATTACTGGGCGTAAAGCGTGCGCAGGCGGTTATATAAGACAGTTGTGAAATCCCCGGGCTCAACCTGGGAACTGCATCTGTGACTGTATAGCTAGAGTACGGTAGAG
g__Acinetobacter, 206938	k__Bacteria, p__Proteobacteria, c__Gammaproteobacteria, o__Pseudomonadales, f__Moraxellaceae, g__Acinetobacter, s__	15	1	0	1	1	2	0	3	0	1	1	1	0	0	0	0	0	1	0	0	0	1	2	0	0	0	0	0	0	0	0	0	0	0	0	0	0	0	0	0	0	0	0	0	0	TGTGCCAGCAGCCGCGGTAATACAGAGGGTGCGAGCGTTAATCGGATTTACTGGGCGTAAAGCGTGCGTAGGCGGCTTTTTAAGTCGGATGTGAAATCCCCGAGCTTAACTTGGGAATTGCATTCGATACTGGGAAGCTAGAGTATGGGAGAG
g__Pseudomonas, 203364	k__Bacteria, p__Proteobacteria, c__Gammaproteobacteria, o__Pseudomonadales, f__Pseudomonadaceae, g__Pseudomonas, s__	8	0	0	0	0	0	0	0	0	0	0	0	0	0	0	0	0	0	0	0	0	0	0	0	0	0	0	0	0	0	0	6	2	0	0	0	0	0	0	0	0	0	0	0	0	GTGCCAGCAGCCGCGGTAATACGGAGGGTGCAAGCGTTAATCGGAATTACTGGGCGTAAAGCGCACGCAGGCGGTTGGATAAGTTAGATGTGAAAGCCCCGGGCTCAACCTGGGAATTGCATTTAAAACTGTCCAGCTAGAGTACGGTAGAG
o__Rhizobiales, 202863	k__Bacteria, p__Proteobacteria, c__Alphaproteobacteria, o__Rhizobiales, f__, g__, s__	1822	0	0	0	0	0	62	0	0	10	7	0	2	11	53	0	10	1529	1	2	54	19	0	0	0	0	0	0	2	0	2	0	0	0	57	0	0	0	0	1	0	0	0	0	0	AGCAGCCGCGGTAATACGAAGGGGGCTAGCGTTGCTCGGAATCACTGGGCGTAAAGGGCGCGTAGGCGGACTCTTAAGTCGGGGGTGAAAGCCCAGGGCTCAACCCTGGAATTGCCTTCGATACTGGGAGTCTTGAGTTCGGAAGAGGT
g__Pilimelia, 200014	k__Bacteria, p__Actinobacteria, c__Actinobacteria, o__Actinomycetales, f__Micromonosporaceae, g__Pilimelia, s__	12	0	0	0	0	0	0	0	0	0	0	0	0	0	0	0	0	0	0	0	0	0	0	0	0	0	0	0	0	0	0	0	0	0	0	0	5	7	0	0	0	0	0	0	0	GTGCCAGCAGCCGCGGTAAGACGTAGGGCGCAAGCGTTGTCCGGATTTATTGGGCGTAAAGAGCTCGTAGGCGGCTTGTCGCGTCGACTGTGAAAACCCGCGGCTTAACTGCGGGACTGCAGTCGATACGGGCAGGCTAGAGTTCGGTAGG
g__Novosphingobium, 199962	k__Bacteria, p__Proteobacteria, c__Alphaproteobacteria, o__Sphingomonadales, f__Sphingomonadaceae, g__Novosphingobium, s__	63	0	0	0	0	0	0	0	0	0	0	0	0	0	0	0	0	63	0	0	0	0	0	0	0	0	0	0	0	0	0	0	0	0	0	0	0	0	0	0	0	0	0	0	0	AGCAGCCGCGGTAATACGGAGGGAGCTAGCGTTGTTCGGAATTACTGGGCGTAAAGCGCACGTAGGCGGCTACACAAGTCAGAGGTGAAAGCCCGGGGCTCAACCCCGGAACTGCCTTTGAAACTAGGTGGCTAGAATCTTGGAGAGG
g__Pseudomonas, 199647	k__Bacteria, p__Proteobacteria, c__Gammaproteobacteria, o__Pseudomonadales, f__Pseudomonadaceae, g__Pseudomonas, s__	32	0	0	0	0	0	0	0	0	0	0	0	0	0	0	0	0	0	0	0	0	0	0	15	0	0	2	0	7	1	0	0	0	0	4	0	0	2	0	1	0	0	0	0	0	GTGCCAGCAGCCGCGGTAATACGAAGGGTGCAAGCGTTAATCGGAATTACTGGGCGTAAAGCGCGCGTAGGTGGTTCAGCAAGTTGGATGTGAAAGCCCCGGGCTCAACCTGGGAACTGCATCCAAAACTACTGAGCTAGAGTACGGTAGA
f__Comamonadaceae, 198096	k__Bacteria, p__Proteobacteria, c__Betaproteobacteria, o__Burkholderiales, f__Comamonadaceae, g__, s__	9	0	0	0	0	0	0	0	0	0	0	0	0	0	0	0	0	9	0	0	0	0	0	0	0	0	0	0	0	0	0	0	0	0	0	0	0	0	0	0	0	0	0	0	0	AGCAGCCGCGGTAATACGTAGGGTGCAAGCGTTAATCGGAATTACTGGGCGTAAAGCGTGCGCAGGCGGTGATGTAAGACAGTTGTGAAATCCCCGGGCTCAACCTGGGAACTGCATCTGTGACTGCATCGCTCGAGTGCGGCAGAGG
o__Ellin6067, 194191	k__Bacteria, p__Proteobacteria, c__Betaproteobacteria, o__Ellin6067, f__, g__, s__	2	0	0	0	0	0	0	0	0	0	0	0	0	0	0	0	0	0	0	0	0	0	0	2	0	0	0	0	0	0	0	0	0	0	0	0	0	0	0	0	0	0	0	0	0	GTGCCAGCAGCCGCGGTAATACGTAGGGTGCGAGCGTTAATCGGAATTACTGGGCGTAAAGCGTGCGCAGGCGGTTTTGTAAGCCAGATGTGAAATCCCCGGGCTTAACCTGGGAATGGCATTTGGGACTGCAAGGCTAGAGTATGGCAGA
g__Rhodococcus, 193867	k__Bacteria, p__Actinobacteria, c__Actinobacteria, o__Actinomycetales, f__Nocardiaceae, g__Rhodococcus, s__	58	0	0	0	0	0	0	30	0	0	0	0	0	0	0	0	0	0	0	0	0	0	0	0	0	0	0	0	0	0	0	0	0	0	0	0	0	0	0	0	28	0	0	0	0	AGCAGCCGCGGTAATACGTAGGGTGCAAGCGTTGTCCGGAATTACTGGGCGTAAAGAGCTCGTAGGCGGTTTGTCGCGTCGTCTGTGAAAACCAGCAGCTCAACTGTTGGCTTGCAGGCGATACGGGCAGACTTGAGTATTTCAGGGG
s__rhizosphaerae, 192795	k__Bacteria, p__Proteobacteria, c__Gammaproteobacteria, o__Pseudomonadales, f__Moraxellaceae, g__Acinetobacter, s__rhizosphaerae	77	0	0	75	0	0	0	0	0	0	0	0	0	0	0	0	0	0	0	0	0	0	0	0	0	0	0	0	0	0	0	0	0	0	0	2	0	0	0	0	0	0	0	0	0	AGCAGCCGCGGTAATACAGAGGGTGCAAGCGTTAATCGGATTTACTGGGCGTAAAGCGCGCGTAGGCGGCCAATTAAGTCAAATGTGAAATCCCCGAGCTTAACTTGGGAATTGCATTCGATACTGTTTGGCTAGAGTGTGGGAGAGG
g__Comamonas, 192227	k__Bacteria, p__Proteobacteria, c__Betaproteobacteria, o__Burkholderiales, f__Comamonadaceae, g__Comamonas, s__	12	0	0	0	0	0	4	0	0	0	0	0	0	0	0	0	0	0	0	0	0	0	0	0	0	0	0	0	6	0	0	0	0	0	2	0	0	0	0	0	0	0	0	0	0	GTGCCAGCAGCCGCGGTAATACGTAGGGTGCAAGCGTTAATCGGAATTACTGGGCGTAAAGCGTGCGCAGGCGGTTTTGTAAGACAGTGGTGAAATCCCCGGGCTCAACCTGGGAACTGCCATTGTGACTGCGAGGCTAGAGTACGGCAGAG
f__Enterobacteriaceae, 191235	k__Bacteria, p__Proteobacteria, c__Gammaproteobacteria, o__Enterobacteriales, f__Enterobacteriaceae, g__, s__	7	0	0	0	0	0	0	0	0	0	0	0	0	0	0	0	0	0	0	0	0	0	0	1	0	0	0	0	0	0	0	0	0	0	0	0	0	0	0	0	0	3	2	0	1	GTGCCAGCAGCCGCGGTAATACGGAGGGATGCAGCGTTAATCGGAATTACTGGGCGTAAAGCGCACCCAGGCGGTTTGTTAAGTCAGATGTGAAATCCCCGAGCTTAACTTGGGAACTGCATTTGAAACTGGCAAGCTAGAGTCTTGTAGA
s__halodurans, 189772	k__Bacteria, p__Firmicutes, c__Bacilli, o__Bacillales, f__Bacillaceae, g__Bacillus, s__halodurans	6	0	0	0	0	0	0	0	0	0	0	0	0	0	0	0	0	0	0	0	0	0	0	0	0	0	0	0	0	0	0	0	0	0	0	6	0	0	0	0	0	0	0	0	0	GTGCCAGCAGCCGCGGTAATACGTAGGTGGCAAGCGTTGTCCGGAATTATTGGGCGTAAAGCGCGCGCAGGCGGTCTCTTAAGTCTGATGTGAAAGCCCCCGGCTCAACCGGGGAGGGTCATTGGAAACTGGGAGACTTGAGTACAGAAGA
f__Ruminococcaceae, 181155	k__Bacteria, p__Firmicutes, c__Clostridia, o__Clostridiales, f__Ruminococcaceae, g__, s__	167	0	0	0	0	0	0	0	0	0	0	0	0	0	0	0	0	0	0	0	0	0	0	0	23	0	8	0	0	0	0	0	0	3	0	54	65	14	0	0	0	0	0	0	0	GTGCCAGCAGCCGCGGTAATACGTAGGTGGCAAGCGTTGTCCGGAATTATTGGGCGTAAAGCGCGCGCAGGCGGATAGGTCAGTCTGTCTTAAAAGTTCGGGGCTTAACCCCGTGATGGGATGGAAACTGCCAATCTAGAGTATCGGAGAGG
g__Novosphingobium, 177975	k__Bacteria, p__Proteobacteria, c__Alphaproteobacteria, o__Sphingomonadales, f__Sphingomonadaceae, g__Novosphingobium, s__	805	0	0	0	0	0	0	0	0	0	0	0	0	0	0	0	0	0	0	0	0	0	0	0	0	27	13	11	84	21	0	1	12	0	629	1	0	1	0	0	0	3	0	0	2	GTGCCAGCAGCCGCGGTAATACGGAGGGAGCTAGCGTTGTTCGGAATTACTGGGCGTAAAGCGCACGTAGGCGGTTACTCAAGTCAGAGGTGAAAGCCCGGGGCTCAACCCCGGAACTGCCTTTGAAACTAGGTAACTAGAATCCTGGAGAG
g__Dermacoccus, 176591	k__Bacteria, p__Actinobacteria, c__Actinobacteria, o__Actinomycetales, f__Dermacoccaceae, g__Dermacoccus, s__	11	0	0	0	0	0	0	0	0	0	0	0	0	0	0	0	0	0	0	0	0	0	0	0	0	0	6	0	0	0	5	0	0	0	0	0	0	0	0	0	0	0	0	0	0	GTGCCAGCAGCCGCGGTAATACGTAGGGTGCGAGCGTTGTCCGGAATTATTGGGCGTAAAGAGCTTGTAGGCGGTTTGTCGCGTCTGCTGTGAAAGACCGGGGCTTAACTCCGGTTCTGCAGTGGGTACGGGCAGGCTAGAGTATGGTAGG
s__effusa, 171126	k__Bacteria, p__Proteobacteria, c__Gammaproteobacteria, o__Xanthomonadales, f__Sinobacteraceae, g__Hydrocarboniphaga, s__effusa	12	0	0	0	0	0	0	0	0	0	0	0	12	0	0	0	0	0	0	0	0	0	0	0	0	0	0	0	0	0	0	0	0	0	0	0	0	0	0	0	0	0	0	0	0	GCAGCCGCGGTAATACAGAGGGTGCAAGCGTTAATCGGATTTACTGGGCGTAAAGCGTGCGTAGGCGGCTATTTAAGTCGGATGTGAAAGCCCTGGGCTTAACCTGGGAACTGCATTCGATACTGGGTAGCTGGAGATCGGTAGAGG
g__Uliginosibacterium, 170831	k__Bacteria, p__Proteobacteria, c__Betaproteobacteria, o__Rhodocyclales, f__Rhodocyclaceae, g__Uliginosibacterium, s__	2	0	0	0	0	0	0	0	0	0	0	0	0	0	0	0	0	0	0	0	0	0	0	0	0	0	0	0	1	0	0	0	0	0	1	0	0	0	0	0	0	0	0	0	0	GTGCCAGCAGCCGCGGTAATACGTAGGGTGCGAGCGTTAATCGGAATTACTGGGCGTAAAGCGTGCGCAGGCGGTTTTGTAAGACAGCTGTGAAATCCCCGGGCTCAACCTGGGAACTGCGGTTGTGACTGCAAGACTTGAGTACGGCAGA
s__johnsonii, 170409	k__Bacteria, p__Proteobacteria, c__Gammaproteobacteria, o__Pseudomonadales, f__Moraxellaceae, g__Acinetobacter, s__johnsonii	2	0	0	0	0	0	0	0	0	0	0	0	0	0	0	0	0	0	1	0	1	0	0	0	0	0	0	0	0	0	0	0	0	0	0	0	0	0	0	0	0	0	0	0	0	AGCCGCGGTAATACAGAGGGTGCGAGCGTTAATCGGATTTACTGGGCGTAAAGCGTGCGTAGGCGGCTTTTTAAGTCGGATGTGAAATCCCTGAGCTTAACTTAGGAATTGCATTCGATACTGGGAAGCTAGAGTATGGGAGAGGATGG
g__Pseudomonas, 170405	k__Bacteria, p__Proteobacteria, c__Gammaproteobacteria, o__Pseudomonadales, f__Pseudomonadaceae, g__Pseudomonas, s__	100	0	0	0	0	0	0	0	0	0	0	1	0	0	0	0	0	0	0	0	0	31	0	1	0	6	2	1	0	18	0	9	17	5	0	4	0	0	1	0	0	0	0	0	4	GTGCCAGCAGCCGCGGTAATACAGAGGGTGCAAGCGTTAATCGGAATTACTGGGCGTAAAGCGCGCGTAGGTGGTTTGTTAAGTTGGATGTGAAAGCCCCGGGCTCAACCTGGGAACTGCATCCAAAACTGGCAAGCTAGAGTATGGTAGAG
g__Agrobacterium, 170189	k__Bacteria, p__Proteobacteria, c__Alphaproteobacteria, o__Rhizobiales, f__Rhizobiaceae, g__Agrobacterium, s__	1276	0	0	0	0	0	68	0	0	0	12	12	0	60	0	0	112	641	67	26	0	46	49	69	0	0	7	39	1	0	0	0	0	0	0	0	0	2	0	51	0	4	0	8	2	AGCAGCCGCGGTAATACGAAGGGGGCTAGCGTTGTTCGGAATTACTGGGCGTAAAGCGCACGTAGGCGGATATTTAAGTCAGGGGTGAAATCCCGGGGCTCAACCCCGGAACTGCCTTTGATACTGGGTATCTAGAGTATGGAAGAGGT
f__Rhodocyclaceae, 169725	k__Bacteria, p__Proteobacteria, c__Betaproteobacteria, o__Rhodocyclales, f__Rhodocyclaceae, g__, s__	2	0	0	0	0	0	2	0	0	0	0	0	0	0	0	0	0	0	0	0	0	0	0	0	0	0	0	0	0	0	0	0	0	0	0	0	0	0	0	0	0	0	0	0	0	GCAGCCGCGGTAATACGTAGGGTGCGAGCGTTAATCGGAATTACTGGGCGTAAAGCGTGCGCAGGCGGTTGTGTAAGACAGGTGTGAAATCCCCGGGCTTAACCTGGGAACTGCGCTTGTGACTGCACGACTAGAGTGTGGCAGAGG
s__bacteriovorus, 167511	k__Bacteria, p__Proteobacteria, c__Deltaproteobacteria, o__Bdellovibrionales, f__Bdellovibrionaceae, g__Bdellovibrio, s__bacteriovorus	66	0	0	0	0	0	0	0	0	0	0	0	0	0	0	0	0	0	0	0	0	0	0	0	0	0	1	0	42	1	0	0	0	0	22	0	0	0	0	0	0	0	0	0	0	GTGCCAGCAGCCGCGGTAAGACGAGGGATCCTAGCGTTGTTCGGAATCATTGGGCGTAAAGCGGGTGCAGGTGGCTATGTAAGTCAGGTGTGAAAGCCTAGGGCTCAACCCTAGAAGTGCATTTGATACTGCGTAGCTTGAGTGCTAGAGAG
o__Rhizobiales, 165611	k__Bacteria, p__Proteobacteria, c__Alphaproteobacteria, o__Rhizobiales, f__, g__, s__	145	0	0	0	0	0	15	0	0	0	0	0	0	0	0	0	0	128	0	0	2	0	0	0	0	0	0	0	0	0	0	0	0	0	0	0	0	0	0	0	0	0	0	0	0	AGCAGCCGCGGTAATACGAAGGGGGCTAGCGTTGTTCGGAATTACTGGGCGTAAAGCGCACGTAGGCGGGTATTTAAGTCAGGGGTGAAATCCCAGAGCTCAACTCTGGAACTGCCTTTGATACTGGGTACCTAGAGTATGGAAGAGGT
f__Neisseriaceae, 164660	k__Bacteria, p__Proteobacteria, c__Betaproteobacteria, o__Neisseriales, f__Neisseriaceae, g__, s__	9	0	0	0	0	0	0	0	0	0	0	0	0	0	0	0	0	0	0	0	0	0	0	4	0	0	0	0	3	0	0	0	0	0	0	0	0	0	0	2	0	0	0	0	0	GTGCCAGCAGCCGCGGTAATACGTAGGGTGCAAGCGTTAATCGGAATTACTGGGCGTAAAGCGTGCGCAGGCGGTTGTGCAAGTCTGATGTGAAATCCCCGGGCTTAACCTGGGAACTGCATTGGAGACTGCACGGCTAGAGTGCGTCAGA
g__Fluviicola, 163423	k__Bacteria, p__Bacteroidetes, c__Flavobacteriia, o__Flavobacteriales, f__Cryomorphaceae, g__Fluviicola, s__	350	0	0	0	0	0	0	0	0	0	0	0	0	0	0	0	0	0	0	0	0	0	0	0	0	0	29	0	259	12	23	18	1	0	0	0	0	0	1	0	0	0	0	0	7	CGTGCCAGCAGCCGCGGTAATACGGAGGGTGCAAGCGTTATCCGGAATCATTGGGTTTAAAGGGTCCGCAGGCGGTCTTATAAGTCAGTGGTGAAAGCCTACAGCTCAACTGTAGAACTGCCATTGATACTGTAGGACTTGAATTCGATCGAA
g__Legionella, 163406	k__Bacteria, p__Proteobacteria, c__Gammaproteobacteria, o__Legionellales, f__Legionellaceae, g__Legionella, s__	126	0	0	0	0	0	50	0	0	0	0	0	4	0	0	0	0	0	0	0	0	0	0	4	0	0	13	0	2	2	0	8	21	15	0	0	0	5	0	0	0	0	0	0	2	GTGCCAGCAGCCGCGGTAATACGGAGGGTGCAAGCGTTAATCGGAATTACTGGGCGTAAAGCGTGCGTAGGTGGTTCAATAAGTTATCTGTGAAATCCCTGGGCTCAACCTGGGCAGGTCAGATATTACTGTTGGACTCGAGTATGGGAGAG
g__Pedobacter, 163090	k__Bacteria, p__Bacteroidetes, c__Sphingobacteriia, o__Sphingobacteriales, f__Sphingobacteriaceae, g__Pedobacter, s__	4	0	0	0	0	0	2	0	0	0	0	0	0	0	0	0	0	0	0	0	0	0	0	0	0	0	1	0	0	0	0	0	1	0	0	0	0	0	0	0	0	0	0	0	0	GTGCCAGCAGCCGCGGTAATACGGAGGATCCAAGCGTTATCCGGATTTATTGGGTTTAAGGGTGCGTAGGCGGCCTGTTAAGTCAGGGGTGAAAGACGGTAGCTCAACTATCGCAGTGCCCTTGATACTGATGGGCTTGAATGGACTAGAG
f__Rhodobacteraceae, 161947	k__Bacteria, p__Proteobacteria, c__Alphaproteobacteria, o__Rhodobacterales, f__Rhodobacteraceae, g__, s__	88	0	0	0	0	0	0	0	0	0	0	0	0	0	0	0	0	88	0	0	0	0	0	0	0	0	0	0	0	0	0	0	0	0	0	0	0	0	0	0	0	0	0	0	0	AGCAGCCGCGGTAATACGGAGGGGGCTAGCGTTGTTCGGAATTACTGGGCGTAAAGCGCGCGTAGGCGGATTGGAAAGTTGGGGGTGAAATCCCGGGGCTCAACCTCGGAACTGCCTTCAAAACTCCCAGTCTTGAGTTCGAGAGAGGT
s__schindleri, 161677	k__Bacteria, p__Proteobacteria, c__Gammaproteobacteria, o__Pseudomonadales, f__Moraxellaceae, g__Acinetobacter, s__schindleri	60	0	0	0	0	0	0	0	0	0	0	0	0	0	0	0	0	0	0	0	0	0	0	0	0	10	0	8	0	0	0	2	0	0	0	40	0	0	0	0	0	0	0	0	0	GTGCCAGCAGCCGCGGTAATACAGAGGGTGCGAGCGTTAATCGGATTTACTGGGCGTAAAGCGTGCGTAGGCGGCTTTTTAAGTCGGATGTGAAATCCCTGAGCTTAACTTAGGAATTGCATTCGATACTGGAAAGCTAGAGTATGGGAGAG
g__Pedobacter, 161490	k__Bacteria, p__Bacteroidetes, c__Sphingobacteriia, o__Sphingobacteriales, f__Sphingobacteriaceae, g__Pedobacter, s__	58	0	0	0	0	0	0	0	0	0	0	0	0	0	0	0	0	0	0	0	0	0	0	0	0	0	4	0	43	1	0	1	6	1	0	0	0	0	0	0	0	1	0	0	1	GTGCCAGCAGCCGCGGTAATACGGAGGATCCAAGCGTTATCCGGATTTATTGGGTTTAAAGGGTGCGTAGGCGGCCTGTTAAGTCAGGGGTGAAAGACGGTGGCTCAACCATCGCAGTGCCCTTGATACTGACGGGCTTGAATGGACTAGAG
g__Limnohabitans, 159950	k__Bacteria, p__Proteobacteria, c__Betaproteobacteria, o__Burkholderiales, f__Comamonadaceae, g__Limnohabitans, s__	632	0	0	0	0	0	8	0	0	0	0	0	0	0	0	0	0	21	0	0	0	0	0	15	0	8	2	2	101	0	0	5	7	2	331	34	1	3	0	34	0	5	3	34	16	GTGCCAGCAGCCGCGGTAATACGTAGGGTGCAAGCGTTAATCGGAATTACTGGGCGTAAAGCGTGCGCAGGCGGTTATGTAAGACAGAGGTGAAATCCCCGGGCTCAACCTGGGAACTGCCTTTGTGACTGCATAGCTAGAGTACGGCAGAG
g__Pimelobacter, 158208	k__Bacteria, p__Actinobacteria, c__Actinobacteria, o__Actinomycetales, f__Nocardioidaceae, g__Pimelobacter, s__	2	0	0	0	0	0	2	0	0	0	0	0	0	0	0	0	0	0	0	0	0	0	0	0	0	0	0	0	0	0	0	0	0	0	0	0	0	0	0	0	0	0	0	0	0	GCAGCCGCGGTAATACGTAGGGTCCGAGCGTTGTCCGGAATTATTGGGCGTAAAGGGCTCGTAGGCGGTTTGTCGCGTCGGGAGTGAAAACACCGGGCTTAACTCGGTGCTTGCTTCCGATACGGGCAGACTAGAGGTATGCAGGGG
g__Agrobacterium, 157614	k__Bacteria, p__Proteobacteria, c__Alphaproteobacteria, o__Rhizobiales, f__Rhizobiaceae, g__Agrobacterium, s__	4	0	0	0	0	0	0	0	0	0	0	0	0	0	0	0	0	0	0	0	0	0	0	4	0	0	0	0	0	0	0	0	0	0	0	0	0	0	0	0	0	0	0	0	0	GTGCCAGCAGCCGCGGTAATACGAAGGGGGCTAGCGTTGTTCGGAATTACTGGGCGTAAAGCGCACGTAGGCGGACATTTAAGTCAGGGGTGAAATCCCAGAGCTCAACTCTGGAACTGCCTTTGATACTGGGTGTCTTGAGTATGGAAGA
f__Pseudomonadaceae, 156652	k__Bacteria, p__Proteobacteria, c__Gammaproteobacteria, o__Pseudomonadales, f__Pseudomonadaceae, g__, s__	340	0	0	0	0	0	0	0	0	0	0	0	0	0	0	0	0	0	0	0	0	0	0	4	14	18	42	31	4	55	7	66	43	22	0	12	0	13	0	0	0	0	0	0	9	GTGCCAGCAGCCGCGGTAATACAGAGGGTGCAAGCGTTAATCGGAATTACTGGGCGTAAAGCGCGCGTAGGTGGTTCGTTAAGTTGGATGTGAAATCCCCGGGCTCAACCTGGGAACTGCATCCAAAACTGGCGAGCTAGAGTATGGTAGAG
c__SJA-4, 155925	k__Bacteria, p__TM6, c__SJA-4, o__, f__, g__, s__	70	0	0	0	65	5	0	0	0	0	0	0	0	0	0	0	0	0	0	0	0	0	0	0	0	0	0	0	0	0	0	0	0	0	0	0	0	0	0	0	0	0	0	0	0	AGCAGCCGCGGTAATACGAGGGGTGCAAGCGTTATTCGGAATTATTGGGCGTAAAGGGTGCGTAGACGGCATATTAAGTCAACTGTTAAATTCCTCGGCCTAACTGGGGACCAGCGGTAGATACTGATGTGCTAGAGGATGGAAGAGAG
f__Bacillaceae, 152690	k__Bacteria, p__Firmicutes, c__Bacilli, o__Bacillales, f__Bacillaceae, g__, s__	45	0	0	0	0	0	0	0	0	0	0	0	0	0	0	15	0	0	0	0	0	0	28	0	0	2	0	0	0	0	0	0	0	0	0	0	0	0	0	0	0	0	0	0	0	AGCAGCCGCGGTAATACGTAGGTGGCAAGCGTTGTCCGGGAATTATTGGGCGTAAAGCGCGCGCAGGCGGTCTCTTAAGTCTGATGTGAAATCTCGCGGCTCAACCGCGAGCGGTCATTGGAAACTGGGAGACTTGAGTGCAGAAGAGGA
f__Neisseriaceae, 151797	k__Bacteria, p__Proteobacteria, c__Betaproteobacteria, o__Neisseriales, f__Neisseriaceae, g__, s__	44	0	0	0	0	0	0	0	0	0	0	0	0	0	0	0	0	3	0	0	41	0	0	0	0	0	0	0	0	0	0	0	0	0	0	0	0	0	0	0	0	0	0	0	0	GCAGCCGCGGTAATACGTAGGGTCCAAGCGTTAATCGGAATTACTGGGCGTAAAGCGTGCGCAGGTGGTTTGTTAAGCACGATGTGAAATCCCCGGGCTCAACCTGGGAATTGCATTGTGAACTGACTGACTAGAGTACGGCAGAGG
s__stutzeri, 151390	k__Bacteria, p__Proteobacteria, c__Gammaproteobacteria, o__Pseudomonadales, f__Pseudomonadaceae, g__Pseudomonas, s__stutzeri	56	0	0	0	0	0	0	0	0	41	0	0	0	0	0	0	0	2	0	0	0	0	0	0	0	0	0	13	0	0	0	0	0	0	0	0	0	0	0	0	0	0	0	0	0	AGCAGCCGCGGTAATACGAAGGGTGCAAGCGTTAATCGGAATTACTGGGCGTAAAGCGCGCGTAGGTGGTTTGTTAAGTTGGATGTGAAAGCCCCGGGCTCAACCTGGGAACTGCATCCAAAACTGGCAAGCTAGAGTATGGCAGAGG
g__Sphingomonas, 150673	k__Bacteria, p__Proteobacteria, c__Alphaproteobacteria, o__Sphingomonadales, f__Sphingomonadaceae, g__Sphingomonas, s__	7	0	0	0	0	0	0	0	0	0	7	0	0	0	0	0	0	0	0	0	0	0	0	0	0	0	0	0	0	0	0	0	0	0	0	0	0	0	0	0	0	0	0	0	0	GCAGCCGCGGTAATACGGAGGGAGCTAGCGTTATTCGGAATTACTGGGCGTAAAGCGCACGTAGGCGGCTTTGTAAGTTAGAGGTGAAAGCCTGGAGCTCAACTCCAGAATTGCCTTTAAGACTGCATCGCTTGAATCCAGGAGAGGT
f__Rhodocyclaceae, 150389	k__Bacteria, p__Proteobacteria, c__Betaproteobacteria, o__Rhodocyclales, f__Rhodocyclaceae, g__, s__	2	0	0	0	0	0	2	0	0	0	0	0	0	0	0	0	0	0	0	0	0	0	0	0	0	0	0	0	0	0	0	0	0	0	0	0	0	0	0	0	0	0	0	0	0	GCAGCCGCGGTAATACGTAGGGTGCGAGCGTTAATCGGAATTACTGGGCGTAAAGCGTGCGCAGGCGGTTATGTAAGACAGATGTGAAATCCCCGGGCTTAACCTGGGAACTGCGTTTGTGACTGCATAACTTGAGTGCGGCAGAGG
g__Plesiomonas, 149034	k__Bacteria, p__Proteobacteria, c__Gammaproteobacteria, o__Enterobacteriales, f__Enterobacteriaceae, g__Plesiomonas, s__	2	0	0	0	0	0	0	0	0	0	0	0	0	0	0	0	0	0	0	0	0	0	0	0	0	0	0	0	0	0	0	0	0	0	2	0	0	0	0	0	0	0	0	0	0	AGCAGCCGCGGTAATACGGAGGGTGCAAGCGTTAATCGGAATTACTGGGCGTAAAGCGCACGCAGGCGGTTTGTTAAGTCAGATGTGAAATCCCCGAGCTCAACTTGGGAACTGCATTTGAGACTGGCAAGCTAGAGTCTTGTAGAGG
f__Comamonadaceae, 148550	k__Bacteria, p__Proteobacteria, c__Betaproteobacteria, o__Burkholderiales, f__Comamonadaceae, g__, s__	1636	1	2	0	0	0	1278	0	0	0	0	1	32	0	1	0	0	312	0	0	0	0	0	0	0	0	0	0	0	0	0	0	0	0	9	0	0	0	0	0	0	0	0	0	0	AGCAGCCGCGGTAATACGTAGGGTGCAAGCGTTAATCGGAATTACTGGGCGTAAAGCGTGCGCAGGCGGTTGTGCAAGACAGGTGTGAAATCCCCGGGCTTAACCTGGGAACTGCACTTGTGACTGCACAGCTGGAGTGCGGCAGAGGG
f__Chitinophagaceae, 146138	k__Bacteria, p__Bacteroidetes, c__[Saprospirae], o__[Saprospirales], f__Chitinophagaceae, g__, s__	2	0	0	0	0	0	0	0	0	0	0	0	0	0	0	0	0	0	0	0	0	0	0	0	0	0	0	0	2	0	0	0	0	0	0	0	0	0	0	0	0	0	0	0	0	GTGCCAGCAGCCGCGGTAATACGGAGGGTGCAAGCGTTATCCGGATTCACTGGGTTTAAAGGGTGTGTAGGCGGGCTATTAAGTCAGTGGTGAAATCTCCGGGCTCAACCCGGAAACTGCCATTGATACTATTAGTCTTGAATGTTGTTGA
f__Legionellaceae, 146022	k__Bacteria, p__Proteobacteria, c__Gammaproteobacteria, o__Legionellales, f__Legionellaceae, g__, s__	13	0	0	0	0	0	0	0	0	0	0	0	0	0	0	0	0	0	0	0	0	0	0	12	0	0	0	0	0	0	0	0	0	0	0	0	0	0	0	1	0	0	0	0	0	GTGCCAGCAGCCGCGGTAATACGGAGGGTGCGAGCGTTAATCGGAATTACTGGGCGTAAAGGGTGCGTAGGTGGTTAAGTAAGTTATCTGTGAAAGCCCAGGGCTTAACCTTGGAGGGTCAGATAAGACTATTTGGCTAGAGTATGAGAGA
f__Rhodocyclaceae, 144875	k__Bacteria, p__Proteobacteria, c__Betaproteobacteria, o__Rhodocyclales, f__Rhodocyclaceae, g__, s__	46	0	0	0	0	0	0	0	0	0	0	0	0	0	0	0	0	0	0	0	0	0	0	45	0	0	0	0	0	0	0	0	0	0	0	0	0	0	0	1	0	0	0	0	0	GTGCCAGCAGCCGCGGTAATACGTAGGGTGCAAGCGTTAATCGGAATTACTGGGCGTAAAGCGTGCGCAGGCGGTTTTGTAAGACAGGCGTGAAATCCCCGGGCTCAACCTGGGAATTGCGCTTGTGACTGCAAGGCTGGAGTGCGGCAGAG
f__Rhizobiaceae, 144720	k__Bacteria, p__Proteobacteria, c__Alphaproteobacteria, o__Rhizobiales, f__Rhizobiaceae, g__, s__	1358	0	0	0	0	0	1344	0	0	0	0	0	4	0	0	0	0	7	0	0	0	1	0	2	0	0	0	0	0	0	0	0	0	0	0	0	0	0	0	0	0	0	0	0	0	AGCAGCCGCGGTAATACGAAGGGGGCTAGCGTTGTTCGGAATTACTGGGCGTAAAGCGCACGTAGGCGGACATTTAAGTCAGGGGTGAAATCCCGGGGCTCAACCCCGGAACTGCCTTTGATACTGGGTGTCTAGAGTATGGAAGAGGT
g__Polaromonas, 144640	k__Bacteria, p__Proteobacteria, c__Betaproteobacteria, o__Burkholderiales, f__Comamonadaceae, g__Polaromonas, s__	1155	0	0	0	0	0	44	0	0	0	0	0	0	0	0	0	0	246	9	1	2	2	1	37	0	32	62	10	59	71	10	175	77	86	11	29	14	14	50	73	19	1	5	3	12	GTGCCAGCAGCCGCGGTAATACGTAGGGTGCAAGCGTTAATCGGAATTACTGGGCGTAAAGCGTGCGCAGGCGGTTATGTAAGACAGATGTGAAATCCCCGGGCTCAACCTGGGAACTGCATTTGTGACTGCATAGCTAGAGTACGGCAGAG
f__Comamonadaceae, 143210	k__Bacteria, p__Proteobacteria, c__Betaproteobacteria, o__Burkholderiales, f__Comamonadaceae, g__, s__	3	0	0	0	0	0	0	0	0	0	0	0	0	0	0	0	0	0	0	0	0	0	0	0	0	0	0	0	0	0	0	0	0	0	0	0	0	0	0	0	0	0	0	3	0	GTGCCAGCAGCCGCGGTAATACGTAGGGTGCAAGCGTTAATCGGAATTACTGGGCGTAAAGCGTGCGCAGGCGGTGATGTAAGACAGATGTGAAATCCCCGGGCTCAACCTGGGAACTGCATTTGTGACTGCATCGCTGGAGTGCGGCAGA
g__Achromobacter, 142658	k__Bacteria, p__Proteobacteria, c__Betaproteobacteria, o__Burkholderiales, f__Alcaligenaceae, g__Achromobacter, s__	82	1	0	2	2	0	0	0	0	1	0	2	0	0	0	0	0	0	1	2	0	2	0	0	6	0	6	0	1	1	3	0	0	0	21	0	0	0	3	0	27	0	0	0	1	AGCAGCCGCGGTAATACGTAGGGTGCAAGCGTTAATCGGAATTACTGGGCGTAAAGCGTGCGCAGGCGGTTCGGAAAGAAAGATGTGAAATCCCAGAGCTTAACTTTGGAACTGCATTTTTAACTACCGAGCTAGAGTGTGTCAGAGGG
g__Rhizobium, 142346	k__Bacteria, p__Proteobacteria, c__Alphaproteobacteria, o__Rhizobiales, f__Rhizobiaceae, g__Rhizobium, s__	3	0	0	0	0	0	0	0	0	0	0	0	0	0	0	0	0	3	0	0	0	0	0	0	0	0	0	0	0	0	0	0	0	0	0	0	0	0	0	0	0	0	0	0	0	GCAGCCGCGGTAATACGAAGGGGGCTAGCGTTGTTCGGATTTACTGGGCGTAAAGCGCACGTAGGCGGATCGATCAGTCAGGGGTGAAATCCCAGAGCTCAACTCTGGAACTGCCTTTGATACTGTCGATCTGGAGTATGGAAGAGG
g__Opitutus, 142233	k__Bacteria, p__Verrucomicrobia, c__Opitutae, o__Opitutales, f__Opitutaceae, g__Opitutus, s__	21	0	0	0	0	0	21	0	0	0	0	0	0	0	0	0	0	0	0	0	0	0	0	0	0	0	0	0	0	0	0	0	0	0	0	0	0	0	0	0	0	0	0	0	0	GCAGCCGCGGTAATACAGAGACTGCAAGCGTTATTCGGATTCACTGGGCGTAAAGGGTGCGCAGGCGGCCGTGTGTGTGAGGCGTGAAAGCCCGATGCTTAACATCGGAATTGCACCTCAAACTACACGGCTAGAGCATTGGAGAGG
f__Pseudomonadaceae, 141365	k__Bacteria, p__Proteobacteria, c__Gammaproteobacteria, o__Pseudomonadales, f__Pseudomonadaceae, g__, s__	2	0	0	0	0	0	0	0	0	0	0	0	0	0	0	0	0	0	0	0	0	0	0	0	0	0	0	0	0	0	0	2	0	0	0	0	0	0	0	0	0	0	0	0	0	AGCAGCCGCGGTAATACGGAGGGTGCAAGCGTTAATCGGAATTACTGGGCGTAAAGCGCGCGTAGGTGGTTCGTTAAGTTGGATGTGAAATCCCCGGGCTCAACCTGGGAACTGCATTCAAAACTGTCGAGCTAGAGTATGGTAGAGG
s__delafieldii, 141316	k__Bacteria, p__Proteobacteria, c__Betaproteobacteria, o__Burkholderiales, f__Comamonadaceae, g__Acidovorax, s__delafieldii	31	0	0	0	0	0	6	0	0	0	0	0	0	0	1	0	0	21	1	0	0	0	2	0	0	0	0	0	0	0	0	0	0	0	0	0	0	0	0	0	0	0	0	0	0	AGCAGCCGCGGTAATACGTAGGGTGCGAGCGTTAATCGGAATTACTGGGCGTAAAGCGTGCGCAGGCGGTTATGTAAGACAGATGTGAAATCCCCGGGCTCAACCTGGGAACTGCATCTGTGACTGCATAGCTAGAGTACGGCAGAGG
g__Comamonas, 140235	k__Bacteria, p__Proteobacteria, c__Betaproteobacteria, o__Burkholderiales, f__Comamonadaceae, g__Comamonas, s__	5	0	0	0	0	0	5	0	0	0	0	0	0	0	0	0	0	0	0	0	0	0	0	0	0	0	0	0	0	0	0	0	0	0	0	0	0	0	0	0	0	0	0	0	0	AGCAGCCGCGGTAATACGTAGGGTGCAAGCGTTAATCGGAATTACTGGGCGTAAAGCGTGCGCAGGCGGTTTTGTAAGACAGTGGTGAAATCCCCGGGCTCAACCTGGGAACTGCCATTGTGACTGCAAGGCTGGAGTGCGGCAGAGG
g__Flectobacillus, 139268	k__Bacteria, p__Bacteroidetes, c__Cytophagia, o__Cytophagales, f__Cytophagaceae, g__Flectobacillus, s__	5	0	0	0	0	0	2	0	0	0	0	0	0	0	0	0	0	0	0	0	0	0	0	2	0	0	0	0	0	0	0	0	0	0	0	0	0	0	0	1	0	0	0	0	0	CGTGCCAGCAGCCGCGGTAATACGGAGGGTGCGAGCGTTGTCCGGATTTATTGGGTTTAAAGGGTGCGTAGGCGGTTTATTAAGTCAGTGGTGAAAGACGGTCGCTCAACGATTGCAGTGCCATTGATACTGGTAGACTTGAGTTCGAATGAGGTA
f__Clostridiaceae, 138368	k__Bacteria, p__Firmicutes, c__Clostridia, o__Clostridiales, f__Clostridiaceae, g__, s__	2	0	0	0	0	0	0	0	0	0	0	0	0	0	0	0	0	0	0	0	0	0	0	0	0	0	0	0	2	0	0	0	0	0	0	0	0	0	0	0	0	0	0	0	0	GTGCCAGCAGCCGCGGTAATACGTAGGGGGCTAGCGTTATCCGGAATTACTGGGCGTAAAGGGTGCGTAGGTGGTTTCTTAAGTCAGAAGTGAAAGGCTACGGCTCAACCGTAGTAAGCTTTTGAAACTAAGAGACTTGAGTGCAGGAGAG
f__Micrococcaceae, 137981	k__Bacteria, p__Actinobacteria, c__Actinobacteria, o__Actinomycetales, f__Micrococcaceae, g__, s__	13	0	0	0	0	0	0	0	0	0	0	0	0	0	0	0	0	0	0	0	0	0	0	0	0	0	0	0	2	0	0	0	0	0	0	11	0	0	0	0	0	0	0	0	0	GTGCCAGCAGCCGCGGTAATACGTAGGGCGCAAGCGTTATCCGGAATTATTGGGCGTAAAGAGCTCGTAGGCGGTTTGTCGCGTCTGCTGTGAAAGACCGGGGCTCAACTCCGGTTCTGCAGTGGGTACGGGCAGACTAGAGTGCAGTAGG
f__Acetobacteraceae, 137594	k__Bacteria, p__Proteobacteria, c__Alphaproteobacteria, o__Rhodospirillales, f__Acetobacteraceae, g__, s__	4	0	0	0	0	0	0	0	0	0	0	0	0	0	0	0	0	0	0	0	0	0	0	0	0	0	0	0	0	0	0	0	0	0	0	0	0	0	4	0	0	0	0	0	0	GTGCCAGCAGCCGCGGTAATACGAAGGGGGCTAGCGTTACTCGGAATTACTGGGCGTAAAGGGCGCGTAGGCGGCGCTGCAAGTTAGGCGTGAAAGCCCTGGGCTCAACCTGGGGACTGCGCTTAAGACTGTGGTGCTTGAGGATGGAAGA
g__Azoarcus, 137385	k__Bacteria, p__Proteobacteria, c__Betaproteobacteria, o__Rhodocyclales, f__Rhodocyclaceae, g__Azoarcus, s__	133	0	0	0	0	0	116	0	0	0	0	0	1	0	0	0	0	16	0	0	0	0	0	0	0	0	0	0	0	0	0	0	0	0	0	0	0	0	0	0	0	0	0	0	0	GCAGCCGCGGTAATACGTAGGGTGCAAGCGTTAATCGGAATTACTGGGCGTAAAGCGTGCGCAGGCGGTTGTGTAAGACAGGTGTGAAATCCCCGGGCTTAACCTGGGAACTGCGCTTGTGACTGCACGGCTAGAGTACGGCAGAGGG
f__[Weeksellaceae], 136549	k__Bacteria, p__Bacteroidetes, c__Flavobacteriia, o__Flavobacteriales, f__[Weeksellaceae], g__, s__	2	0	0	0	0	0	0	0	0	0	0	0	0	0	0	0	0	0	0	0	0	0	0	0	0	0	0	0	0	0	0	0	0	0	2	0	0	0	0	0	0	0	0	0	0	GTGCCAGCAGCCGCGGTAATACGGAGGATCCAAGCGTTATCCGGAATCATTGGGTTTAAAGGGTCCGTAGCGGTTTTATAAGTCAGTGGTGAAATCTGGTCGCTCAACGATCAAACGGCCATTGATACTGTAAGACTTGAATTACTTGG
g__Novosphingobium, 135897	k__Bacteria, p__Proteobacteria, c__Alphaproteobacteria, o__Sphingomonadales, f__Sphingomonadaceae, g__Novosphingobium, s__	300	0	0	0	0	0	0	0	0	0	0	0	0	0	0	0	0	0	0	0	0	0	0	10	0	25	17	9	1	50	0	67	55	4	33	1	0	0	17	0	0	0	1	0	10	GTGCCAGCAGCCGCGGTAATACGGAGGGAGCTAGCGTTGTTCGGAATTACTGGGCGTAAAGCGCACGTAGGCGGCGACACAAGTCAGAGGTGAAAGCCCGGGGCTCAACCCCGGAACTGCCTTTGAAACTAGGTTGCTAGAATCTTGGAGAG
f__Microbacteriaceae, 134121	k__Bacteria, p__Actinobacteria, c__Actinobacteria, o__Actinomycetales, f__Microbacteriaceae, g__, s__	66	0	0	0	0	0	61	0	0	0	0	0	2	0	0	0	0	0	0	0	0	0	0	3	0	0	0	0	0	0	0	0	0	0	0	0	0	0	0	0	0	0	0	0	0	AGCAGCCGCGGTAATACGTAGGGTGCAAGCGTTATCCGGAATTATTGGGCGTAAAGAGCTCGTAGGCGGTTTGTCGCGTCTGCTGTGAAAACTGGGGGCTCAACCCCCAGCCTGCAGTGGGTACGGGCAGACTAGAGTGCGGTAGGGGA
f__Holophagaceae, 133176	k__Bacteria, p__Acidobacteria, c__Holophagae, o__Holophagales, f__Holophagaceae, g__, s__	16	0	0	0	0	0	0	0	0	0	0	0	0	0	0	0	0	0	0	0	0	0	0	0	0	16	0	0	0	0	0	0	0	0	0	0	0	0	0	0	0	0	0	0	0	GTGCCAGCAGCCGCGGTAATACAGAGGGGGCAAGCGTTATTCGGAATTATTGGGCGTAAAGGGCGCGTAGGCGGTTTTTTAAGTCGGATGTGCAATCCCCGAGCTCAACTTGGGAACTGCATCCGAGACTGGAAGGCTAGAGTACTGGAGA
f__Hyphomonadaceae, 132233	k__Bacteria, p__Proteobacteria, c__Alphaproteobacteria, o__Rhodobacterales, f__Hyphomonadaceae, g__, s__	8	0	0	0	0	0	0	0	0	0	0	0	0	0	0	0	0	0	0	0	0	0	0	0	0	2	0	0	1	0	2	0	0	0	0	0	0	0	0	0	0	3	0	0	0	GTGCCAGCAGCCGCGGTAATACGAAGGGGGCTAGCGTTGTTCGGATTTACTGGGCGTAAAGCGCGTGTAGGCGGGTCGTTAAGTTGGGGGTGAAATCCCGAGGCTCAACCTCGGAACTGCCTTCAAAACTGGCGACCTGGACTCAAGTAGA
s__chocolatum, 131902	k__Bacteria, p__Actinobacteria, c__Actinobacteria, o__Actinomycetales, f__Microbacteriaceae, g__Microbacterium, s__chocolatum	1435	0	8	0	0	0	343	0	0	0	0	0	2	0	0	0	0	23	0	0	0	0	0	370	0	0	25	7	198	0	0	0	0	32	379	0	1	0	5	39	0	0	1	2	0	GTGCCAGCAGCCGCGGTAATACGTAGGGTGCAAGCGTTATCCGGAATTATTGGGCGTAAAGAGCTCGTAGGCGGTTTGTCGCGTCTGCTGTGAAATCCCGAGGCTCAACCTCGGGCCTGCAGTGGGTACGGGCAGACTAGAGTGCGGTAGGG
f__Xanthomonadaceae, 129907	k__Bacteria, p__Proteobacteria, c__Gammaproteobacteria, o__Xanthomonadales, f__Xanthomonadaceae, g__, s__	2	0	0	1	0	0	0	0	0	0	1	0	0	0	0	0	0	0	0	0	0	0	0	0	0	0	0	0	0	0	0	0	0	0	0	0	0	0	0	0	0	0	0	0	0	GCAGCCGCGGTAATACGAAGGGTGCAAGCGTTACTCGGAATTACTGGGCGTAAAGCGTGCGTAGGTGGTCGTTTAAGTCCGTTGTGAAGCCCTGGGCTCAACCTGGGAACTGCAGTGGATACTAGGCGACTAGAGTGTGGTAGAGG
g__Delftia, 128347	k__Bacteria, p__Proteobacteria, c__Betaproteobacteria, o__Burkholderiales, f__Comamonadaceae, g__Delftia, s__	18	0	1	1	0	1	0	0	0	4	0	0	0	0	0	0	1	2	0	0	0	0	0	4	0	1	0	0	0	0	0	0	0	0	0	0	0	0	0	2	0	0	0	1	0	AGCAGCCGCGGTAATACGTGGGGTGCGAGCGTTAATCGGAATTACTGGGCGTAAAGCGTGCGCAGGCGGTTATGTAAGACAGATGTGAAATCCCCGGGCTCAACCTGGGAACTGCATTTGTGACTGCATGGCTAGAGTACGGTAGAGG
f__Comamonadaceae, 128171	k__Bacteria, p__Proteobacteria, c__Betaproteobacteria, o__Burkholderiales, f__Comamonadaceae, g__, s__	26	0	0	0	0	0	3	0	0	0	0	0	0	0	0	0	0	22	0	1	0	0	0	0	0	0	0	0	0	0	0	0	0	0	0	0	0	0	0	0	0	0	0	0	0	AGCAGCCGCGGTAATACGTAGGGTGCGAGCGTTAATCGGAATTACTGGGCGTAAAGCGTGCGCAGGCGGTGATGTAAGACAGATGTGAAATCCCCGGGCTCAACCTGGGAACTGCATTTGTGACTGCATTGCTGGAGTGCGGCAGAGG
g__Novosphingobium, 127870	k__Bacteria, p__Proteobacteria, c__Alphaproteobacteria, o__Sphingomonadales, f__Sphingomonadaceae, g__Novosphingobium, s__	2241	0	0	0	0	0	0	1	0	0	0	0	0	0	0	0	0	0	0	17	87	0	0	62	33	159	192	173	78	206	15	500	328	77	8	48	30	63	91	3	0	2	1	1	66	CGTGCCAGCAGCCGCGGTAATACGGAGGGAGCTAGCGTTGTTCGGAATTACTGGGCGTAAAGCGCGCGTAGGCGGCGACACAAGTCAGAGGTGAAAGCCCGGGGCTCAACCCCGGAACTGCCTTTGAAACTAGGTTGCTAGAATCTTGGAGAG
g__KD1-23, 115161	k__Bacteria, p__Proteobacteria, c__Betaproteobacteria, o__Rhodocyclales, f__Rhodocyclaceae, g__KD1-23, s__	2	0	0	0	0	0	0	0	0	0	0	0	0	0	0	0	0	2	0	0	0	0	0	0	0	0	0	0	0	0	0	0	0	0	0	0	0	0	0	0	0	0	0	0	0	GCAGCCGCGGTAATACGTAGGGTGCGAGCGTTAATCGGAATTACTGGGCGTAAAGCGTGCGCAGGCGGTTTCGTAAGACAGAGGTGAAATCCCCGGGCTCAACCTGGGAACTGCCTTTGTGACTGTATAGCTAGAGTACGGCAGAGG
g__Campylobacter, 114621	k__Bacteria, p__Proteobacteria, c__Epsilonproteobacteria, o__Campylobacterales, f__Campylobacteraceae, g__Campylobacter, s__	5	0	0	0	0	0	0	0	0	0	0	0	0	0	0	0	0	0	0	0	0	0	0	0	0	0	0	0	0	0	0	0	0	0	0	0	0	5	0	0	0	0	0	0	0	GTGCCAGCAGCCGCGGTAATACGGAGGGTGCAAGCGTTACTCGGAATCACTGGGCGTAAAGGACGCGTAGGCGGATTATCAAGTCTCTTGTGAAATCTAACGGCTTAACCGTTAAACTGCTTGGGAAACTGATAATCTAGAGTAAGGGAGA
c__TM7-3, 113976	k__Bacteria, p__TM7, c__TM7-3, o__, f__, g__, s__	47	0	0	47	0	0	0	0	0	0	0	0	0	0	0	0	0	0	0	0	0	0	0	0	0	0	0	0	0	0	0	0	0	0	0	0	0	0	0	0	0	0	0	0	0	AGCAGCCGCGGTCATACGTAGGACCCAAGCGTTATCCGGAGTGACTGGGCGTAAAGAGTTGCGTAGGTGGTTTGTAAAGCGAATAGTGAAATCTGGCGGCTCAACCGTACAGGCTATTATTCGAACTCACAAACTCGAGAATGGTAGA
s__stutzeri, 113289	k__Bacteria, p__Proteobacteria, c__Gammaproteobacteria, o__Pseudomonadales, f__Pseudomonadaceae, g__Pseudomonas, s__stutzeri	2	0	0	0	0	0	0	0	0	0	0	0	0	0	0	0	0	2	0	0	0	0	0	0	0	0	0	0	0	0	0	0	0	0	0	0	0	0	0	0	0	0	0	0	0	GTGCCAGCAGCCGCGGTAATACGAAGGGTGCAAGCGTTAATCGGAATTACTGGGCGTAAAGCGCGCGCAGGTGGTTCGTTAAGTTGGATGTGAAAGCCCCGGGCTCAACCTGGGAACTGCATCCAAAACTGGCGAACTAGAGTACGGCAGAGG
f__Cytophagaceae, 112775	k__Bacteria, p__Bacteroidetes, c__Cytophagia, o__Cytophagales, f__Cytophagaceae, g__, s__	1136	0	0	0	0	0	0	0	0	0	0	0	0	0	0	0	0	0	0	0	0	0	0	31	64	122	147	97	39	71	10	150	136	40	66	8	49	73	16	0	0	0	1	2	14	GTGCCAGCAGCCGCGGTAATACGGAGGGTGCAAGCGTTGTCCGGATTTATTGGGTTTAAAGGGTGCGTAGGTGGTTTATTAAGTCAGTGGTGAAAGACGGTCGCTTAACGATTGCAGTGCCATTGATACTGATAGACTTGAGTTTTGTTGAG
g__Nesterenkonia, 112715	k__Bacteria, p__Actinobacteria, c__Actinobacteria, o__Actinomycetales, f__Micrococcaceae, g__Nesterenkonia, s__	4	0	0	0	0	0	0	0	0	0	0	0	0	0	0	0	0	0	0	0	0	0	0	0	0	0	0	0	0	0	0	0	0	0	0	0	0	0	0	0	0	0	0	0	4	GTGCCAGCAGCCGCGGTAATACGTAGGGCGCGAGCATTATCCGGAATTATTGGGCGTAAAGGGCTTGTAGGCGGCTTGTCGCGTCTGCCGTGAAAAATCCGGGCTTAACCCGGATCGTGCGGTGGGTACGGGCTGGCTAGAGTGCAGTAGG
g__Renibacterium, 112057	k__Bacteria, p__Actinobacteria, c__Actinobacteria, o__Actinomycetales, f__Micrococcaceae, g__Renibacterium, s__	75	0	0	53	0	0	0	0	0	0	0	21	0	0	0	0	0	0	1	0	0	0	0	0	0	0	0	0	0	0	0	0	0	0	0	0	0	0	0	0	0	0	0	0	0	GCAGCCGCGGTAATACGTAGGGTGCAAGCGTTATCCGGAATTATTGGGCGTAAAGAGCTCGTAGGCGGTTTGTCGCGTCTGTCGTGAAAGTCCGGGGCTCAACTCCGGATCTGCGGTGGGTACGGGCAGACTAGAGTGATGTAGGGG
o__Burkholderiales, 111967	k__Bacteria, p__Proteobacteria, c__Betaproteobacteria, o__Burkholderiales, f__, g__, s__	3	0	0	0	0	0	3	0	0	0	0	0	0	0	0	0	0	0	0	0	0	0	0	0	0	0	0	0	0	0	0	0	0	0	0	0	0	0	0	0	0	0	0	0	0	GCAGCCGCGGTAATACGTAGGGTGCAAGCGTTAATCGGAATTACTGGGCGTAAAGCGTGCGCAGGCGGTTGTGCAAGACAGGTGTGAAATCCCCGGGCTTAACCTGGGAACTGCATTTGTGACTGCACGGCTAGAGTGTGTCAGAGG
o__Streptophyta, 110514	k__Bacteria, p__Cyanobacteria, c__Chloroplast, o__Streptophyta, f__, g__, s__	14	0	0	0	0	0	0	0	0	0	0	0	0	0	0	0	0	0	0	0	0	0	0	0	0	0	14	0	0	0	0	0	0	0	0	0	0	0	0	0	0	0	0	0	0	GTGCCAGCAGCCGCGGTAAGACAGAGGATGCAAGCGTTATCCGGAATGATTGGGCGTAAAGCGTCTGTAGGTGGCTTTTCAAGTCCGCCGTCAAATCCCAGGGCTCAACCCTGGACAGGCGGTGGAAACTACCAAGCTGGAGTACGGTAGG
s__stutzeri, 109728	k__Bacteria, p__Proteobacteria, c__Gammaproteobacteria, o__Pseudomonadales, f__Pseudomonadaceae, g__Pseudomonas, s__stutzeri	2	0	0	0	0	0	0	0	0	2	0	0	0	0	0	0	0	0	0	0	0	0	0	0	0	0	0	0	0	0	0	0	0	0	0	0	0	0	0	0	0	0	0	0	0	AGCAGCCGCGGTAATACGAAGGGTGCAAGCGTTAATCGGAATTACTGGGCGTAAAGCGCGCGTAGGTGGTTTGTTAAGTTGGATGTGAAAGCCCCGGGCTCAACCTGGGAACTGCATCCAAAACTGGCAAGCTAGAGTATGGCAGAGGG
g__Pandoraea, 107349	k__Bacteria, p__Proteobacteria, c__Betaproteobacteria, o__Burkholderiales, f__Burkholderiaceae, g__Pandoraea, s__	6202	0	2	2	15	1	850	0	0	0	0	0	12	22	9	0	46	3641	0	0	2	1	1	66	0	13	2	0	918	4	8	6	10	21	478	24	9	3	12	23	0	0	0	0	1	AGCAGCCGCGGTAATACGTAGGGTGCAAGCGTTAATCGGAATTACTGGGCGTAAAGCGTGCGCAGGCGGTTTTGTAAGACGGATGTGAAATCCCCGGGCTTAACCTGGGAACTGCATTCGTGACTGCAAGGCTAGAGTATGGCAGAGGG
g__Hydrogenophaga, 106144	k__Bacteria, p__Proteobacteria, c__Betaproteobacteria, o__Burkholderiales, f__Comamonadaceae, g__Hydrogenophaga, s__	10	0	0	0	0	0	5	0	0	0	0	0	0	0	0	0	0	0	0	0	0	0	0	0	0	0	0	0	3	0	0	0	0	0	2	0	0	0	0	0	0	0	0	0	0	GTGCCAGCAGCCGCGGTAATACGTAGGGTGCAAGCGTTAATCGGAATTACTGGGCGTAAAGCGTGCGCAGGCGGTTTTGCAAGACAGTGGTGAAATCCCCGGGCTCAACCTGGGAACTGCCATTGTGACTGCAAGGCTGGAGTGCGGCAGAGGG
g__Luteolibacter, 106097	k__Bacteria, p__Verrucomicrobia, c__Verrucomicrobiae, o__Verrucomicrobiales, f__Verrucomicrobiaceae, g__Luteolibacter, s__	2516	0	0	0	0	0	0	0	11	0	0	0	0	0	1	0	1	22	526	222	758	419	556	0	0	0	0	0	0	0	0	0	0	0	0	0	0	0	0	0	0	0	0	0	0	AGCAGCCGCGGTAATACGAAGGTCCCGAGCGTTGTTCGGAATCACTGGGCGTAAAGGGAGCGTAGGCGGCGTGGTAAGTCAGACGTGAAATCCCGGGGCTCAACCCCGGAACTGCGTCCGATACTGCCATGCTTTGAGGGTTGGAGAGG
g__Agromyces, 105210	k__Bacteria, p__Actinobacteria, c__Actinobacteria, o__Actinomycetales, f__Microbacteriaceae, g__Agromyces, s__	21	0	0	0	0	0	0	0	0	0	0	0	0	0	0	0	0	0	0	0	0	0	0	17	0	0	0	0	1	0	0	0	0	0	0	0	0	0	0	3	0	0	0	0	0	GTGCCAGCAGCCGCGGTAATACGTAGGGTCCGAGCGTTGTCCGGAATTATTGGGCGTAAAGAGCTCGTAGGCGGTTTGTCGCGTCTGCTGTGAAAACTAGAGGCTCAACCTCTAGCCTGCAGTGGGTACGGGCAGACTTGAGTGGTGTAGG
g__Luteolibacter, 104795	k__Bacteria, p__Verrucomicrobia, c__Verrucomicrobiae, o__Verrucomicrobiales, f__Verrucomicrobiaceae, g__Luteolibacter, s__	16925	1	361	176	34	32	5786	156	93	1209	421	407	146	2	314	90	190	7319	54	1	130	2	1	0	0	0	0	0	0	0	0	0	0	0	0	0	0	0	0	0	0	0	0	0	0	AGCAGCCGCGGTAATACGAAGGTCCCAAGCGTTGTTCGGAATCACTGGGCGTAAAGGGTGCGTAGGCGGTTTGGTAAGTCAGATGTGAAATCCCGGGGCTCAACCCCGGAACTGCATCCGATACTGCCAGACTAGAGGACTGGAGAGGT
g__Phenylobacterium, 104646	k__Bacteria, p__Proteobacteria, c__Alphaproteobacteria, o__Caulobacterales, f__Caulobacteraceae, g__Phenylobacterium, s__	8	0	0	0	0	0	8	0	0	0	0	0	0	0	0	0	0	0	0	0	0	0	0	0	0	0	0	0	0	0	0	0	0	0	0	0	0	0	0	0	0	0	0	0	0	AGCAGCCGCGGTAATACGAAGGGGGCTAGCGTTGCTCGGAATTACTGGGCGTAAAGGGCGCGTAGGCGGACAGTTTAGTCAGAGGTGAAAGCCCAGGGCTCAACCTTGGAATTGCCTTTGATACTGGCTGTCTTGAGTACGGGAGAGGT
f__Comamonadaceae, 104281	k__Bacteria, p__Proteobacteria, c__Betaproteobacteria, o__Burkholderiales, f__Comamonadaceae, g__, s__	4	0	0	0	0	0	4	0	0	0	0	0	0	0	0	0	0	0	0	0	0	0	0	0	0	0	0	0	0	0	0	0	0	0	0	0	0	0	0	0	0	0	0	0	0	GCAGCCGCGGTAATACGTAGGGTGCAAGCGTTAATCGGAATTACTGGGCGTAAAGCGTGCGCAGGCGGTTATGCAAGACAGATGTGAAATCCCCGGGCTCAACCTGGGAACTGCATTTGTGACTGCATGGCTAGAGTGCGGCAGAGG
g__Microbacterium, 103628	k__Bacteria, p__Actinobacteria, c__Actinobacteria, o__Actinomycetales, f__Microbacteriaceae, g__Microbacterium, s__	1606	20	21	0	0	0	437	1	1	0	0	0	1	0	1	4	2	1059	0	0	0	0	0	37	0	0	1	4	0	0	0	0	0	0	1	0	0	0	0	15	0	0	1	0	0	AGCAGCCGCGGTAATACGTAGGGCGCAAGCGTTATCCGGAATTATTGGGCGTAAAGAGCTCGTAGGCGGTTTGTCGCGTCTGCTGTGAAATCCCGAGGCTCAACCTCGGGTCTGCAGTGGGTACGGGCAGACTAGAGTGCGGTAGGGGA
f__Comamonadaceae, 99309	k__Bacteria, p__Proteobacteria, c__Betaproteobacteria, o__Burkholderiales, f__Comamonadaceae, g__, s__	41	0	0	0	0	0	41	0	0	0	0	0	0	0	0	0	0	0	0	0	0	0	0	0	0	0	0	0	0	0	0	0	0	0	0	0	0	0	0	0	0	0	0	0	0	AGCAGCCGCGGTAATACGTAGGGTGCGAGCGTTAATCGGAATTACTGGGCGTAAAGCGTGCGCAGGCGGTTGTGCAAGACAGGTGTGAAATCCCCGGGCTTAACCTGGGAACTGCACTTGTGACTGCACAGCTAGAGTACGGTAGAGGG
g__Agrobacterium, 99135	k__Bacteria, p__Proteobacteria, c__Alphaproteobacteria, o__Rhizobiales, f__Rhizobiaceae, g__Agrobacterium, s__	2	0	0	0	0	0	1	0	0	0	0	0	0	0	0	0	0	1	0	0	0	0	0	0	0	0	0	0	0	0	0	0	0	0	0	0	0	0	0	0	0	0	0	0	0	GCAGCCGCGGTAATACGAAGGGGGCTAGCGTTGTTCGGAATTACTGGGCGTAAAGCGCACGTAGGCGGATATTTAAGTCAGGGGTGAAATCCCGGGGCTCAACCCCGGGAACTGCCTTTGATACTGGGTATCTGGAGTATGGAAGAGG
g__Pseudomonas, 95608	k__Bacteria, p__Proteobacteria, c__Gammaproteobacteria, o__Pseudomonadales, f__Pseudomonadaceae, g__Pseudomonas, s__	162	0	0	0	0	0	0	0	0	0	0	1	0	0	0	0	0	9	0	0	0	0	0	18	1	16	32	0	5	3	8	23	11	2	7	3	0	4	5	0	11	0	1	0	2	TGTGCCAGCAGCCGCGGTAATACAGAGGGTGCAAGCGTTAATCGGAATTACTGGGCGTAAAGCGCGCGTAGGTGGTTCGTTAAGTTGGATGTGAAAGCCCCGGGCTCAACCTGGGAACTGCATCCAAAACTGGCGAGCTAGAGTACGGTAGAG
c__TM7-3, 95008	k__Bacteria, p__TM7, c__TM7-3, o__, f__, g__, s__	7	0	0	0	0	0	0	0	0	0	0	0	0	0	0	0	0	0	0	0	0	0	0	0	0	0	0	0	1	0	0	0	0	0	0	0	0	0	0	0	6	0	0	0	0	GTGCCAGCAGCCGCGGTCATACGTAGGGTGCAAGCATTATCCGGAGTGACTGGGCGTAAAGAGTTGCGTAGGCGGTTAGTAAAGCGAATAGTGAAACCTGGTGGCTCAACCATACAGACTATTATTCGAACTCACTACTCGAGAATGGTA
s__viridiflava, 91834	k__Bacteria, p__Proteobacteria, c__Gammaproteobacteria, o__Pseudomonadales, f__Pseudomonadaceae, g__Pseudomonas, s__viridiflava	298	3	43	64	0	0	0	0	1	50	0	0	0	0	12	11	66	0	0	6	0	0	42	0	0	0	0	0	0	0	0	0	0	0	0	0	0	0	0	0	0	0	0	0	0	AGCAGCCGCGGTAATACAGAGGGTGCAAGCGTTAATCGGAATTACTGGGCGTAAAGCGCGCGTAGGTGGTTCGTTAAGTTGGATGTGAAATCCCCGGGCTCAACCTGGGAACTGCATCCAAAACTGGCGAGCTAGAGTAGGGCAGAGGG
o__Sphingobacteriales, 85393	k__Bacteria, p__Bacteroidetes, c__Sphingobacteriia, o__Sphingobacteriales, f__, g__, s__	165	0	0	0	0	0	0	0	0	0	0	0	0	0	0	0	0	0	18	0	101	46	0	0	0	0	0	0	0	0	0	0	0	0	0	0	0	0	0	0	0	0	0	0	0	GCAGCCGCGGTAAGACGAAGGATGCAAGCGTTATCCGGATTCATTGGGTTTAAAGGGAGCGTAGGCGGTCTTATAAGTCAGTGGTGAAAGCTCCTCGCTTAACGAGGAAATTGCCATTGATACTGTAGGACTTGAGTACAGTTGCTG
g__Flavobacterium, 83488	k__Bacteria, p__Bacteroidetes, c__Flavobacteriia, o__Flavobacteriales, f__Flavobacteriaceae, g__Flavobacterium, s__	10	0	0	0	0	0	0	0	0	0	0	0	0	0	0	0	0	0	0	0	0	0	0	0	0	0	0	0	0	0	0	0	1	0	0	8	0	0	0	0	1	0	0	0	0	GTGCCAGCAGCCGCGGTAATACGGAGGATCCGAGCGTTATCCGGAATCATTGGGTTTAAAGGGTCCGTAGGCGGCCCTGTAAGTCAGCGGTGAAATCTCCCGGCTCAACCGGGAAACTGCCGTTGATACTGCAGGGCTTGAATTGCCGGGA
f__Actinomycetaceae, 83011	k__Bacteria, p__Actinobacteria, c__Actinobacteria, o__Actinomycetales, f__Actinomycetaceae, g__, s__	11	0	0	0	0	0	0	0	0	0	0	0	0	0	0	0	0	0	0	0	0	0	0	0	0	0	0	0	0	0	0	0	0	0	0	9	2	0	0	0	0	0	0	0	0	GTGCCAGCAGCCGCGGTAATACGTAGGGCGCGAGCGTTGTCCGGAATTATTGGGCGTAAAGGGCTCGTAGGCGGCTTGTCGCGTCTGCTGTGAAAATGCGGGGCTTAACTCCGTACGTGCAGTGGGTACGGGCAGGCTAGAGTGCGGTAGG
f__Xanthomonadaceae, 81488	k__Bacteria, p__Proteobacteria, c__Gammaproteobacteria, o__Xanthomonadales, f__Xanthomonadaceae, g__, s__	309	0	39	75	20	91	0	0	0	27	0	0	0	0	0	0	0	0	0	0	0	19	0	2	5	0	12	16	0	0	1	0	1	0	0	0	0	0	1	0	0	0	0	0	0	AGCAGCCGCGGTAATACGAAGGGTGCAAGCGTTAATCGGAATTACTGGGCGTAAAGGGTGCGTAGGCGGTTTGTTAAGTCTGTTGTGAAATCCCCGGGCTCAACCTGGGAATGGCAATGGATACTGGCAAGCTAGAGTGTGTCAGAGGA
f__Comamonadaceae, 80070	k__Bacteria, p__Proteobacteria, c__Betaproteobacteria, o__Burkholderiales, f__Comamonadaceae, g__, s__	60	0	0	0	0	0	6	0	0	0	0	0	0	0	0	0	0	32	0	0	0	0	0	22	0	0	0	0	0	0	0	0	0	0	0	0	0	0	0	0	0	0	0	0	0	AGCAGCCGCGGTAATACGTAGGGTGCAAGCGTTAATCGGAATTACTGGGCGTAAAGCGTGCGCAGGCGGCTTTGCAAGACAGATGTGAAATCCCCGGGCTCAACCTGGGAACTGCATTTGTGACTGCATGGCTGGAGTGCGGCAGAGG
f__Comamonadaceae, 74685	k__Bacteria, p__Proteobacteria, c__Betaproteobacteria, o__Burkholderiales, f__Comamonadaceae, g__, s__	3	0	0	0	0	0	0	0	0	0	0	0	0	0	0	0	0	3	0	0	0	0	0	0	0	0	0	0	0	0	0	0	0	0	0	0	0	0	0	0	0	0	0	0	0	AGCAGCCGCGGTAATACGTAGGGTGCAAGCGTTAATCGGAATTACTGGGCGTAAAGCGTGCGCAGGCGGTTATGTAAGACAGATGTGAAATCCCCGGGCTCAACCTGGGAACTGCATTTGTGACTGCATAGCTGGAGTACGGCAGAGG
g__Comamonas, 71872	k__Bacteria, p__Proteobacteria, c__Betaproteobacteria, o__Burkholderiales, f__Comamonadaceae, g__Comamonas, s__	18	0	0	0	0	0	18	0	0	0	0	0	0	0	0	0	0	0	0	0	0	0	0	0	0	0	0	0	0	0	0	0	0	0	0	0	0	0	0	0	0	0	0	0	0	AGCAGCCGCGGTAATACGTAGGGTGCAAGCGTTAATCGGAATTACTGGGCGTAAAGCGTGCGCAGGCGGTTTTGTAAGACAGTGGTGAAATCCCCGGGCTCAACCTGGGAACTGCCATTGTGACTGCAAAGCTAGAGTGCGGCAGAGG
s__porcinus, 70580	k__Bacteria, p__Proteobacteria, c__Gammaproteobacteria, o__Pasteurellales, f__Pasteurellaceae, g__Actinobacillus, s__porcinus	7	0	0	0	0	0	0	0	0	0	0	0	0	0	0	0	0	0	0	0	0	0	0	0	0	0	0	7	0	0	0	0	0	0	0	0	0	0	0	0	0	0	0	0	0	GTGCCAGCAGCCGCGGTAATACGGAGGGTGCGAGCGTTAATCGGAATAACTGGGCGTAAAGGGCACGCAGGCGGTGACTTAAGTGAGATGTGAAAGCCCCGAGCTTAACTTGGGAATTGCATTTCATACTGGGTCGCTAGAGTACTTTAGG
g__Methylobacterium, 68458	k__Bacteria, p__Proteobacteria, c__Alphaproteobacteria, o__Rhizobiales, f__Methylobacteriaceae, g__Methylobacterium, s__	2	0	0	0	1	0	0	0	0	0	0	0	0	0	0	0	1	0	0	0	0	0	0	0	0	0	0	0	0	0	0	0	0	0	0	0	0	0	0	0	0	0	0	0	0	GCCGCGGTAATACGAAGGGGGCTAGCGTTGCTCGGAATCACTGGGCGTAAAGGGCGCGTAGGCGGCCTTGTAAGCTGGGGGTGAAAGCCCGTGGCTCAACCACGGAATTGCCTTCGATACTGCTTGGCTTGAGTGTGGTAGAGGTTG
g__Agrobacterium, 66930	k__Bacteria, p__Proteobacteria, c__Alphaproteobacteria, o__Rhizobiales, f__Rhizobiaceae, g__Agrobacterium, s__	758	0	0	0	0	0	0	0	0	0	0	0	0	0	0	0	0	6	0	0	0	0	0	8	0	83	104	27	191	46	12	90	74	22	0	0	0	51	23	0	1	0	0	3	17	GTGCCAGCAGCCGCGGTAATACGAAGGGGGCTAGCGTTGTTCGGAATTACTGGGCGTAAAGCGCACGTAGGCGGACATTTAAGTCAGGGGTGAAATCCCGGGGCTCAACCTCGGAACTGCCTTTGATACTGGGTGTCTTGAGTATGGAAGAG
f__Comamonadaceae, 62986	k__Bacteria, p__Proteobacteria, c__Betaproteobacteria, o__Burkholderiales, f__Comamonadaceae, g__, s__	3	0	0	0	0	0	0	0	0	0	0	0	0	0	0	0	0	2	0	0	0	0	1	0	0	0	0	0	0	0	0	0	0	0	0	0	0	0	0	0	0	0	0	0	0	GCAGCCGCGGTAATACGTAGGGTGCAAGCGTTAATCGGAATTACTGGGCGTAAAGCGTGCGCAGGCGGTTATGTAAGACAGATGTGAAATCCCCGGGCTTAACCTGGGAACTGCATTTGTGACTGCATAGCTAGAGTACGGTAGAGGG
g__Flavobacterium, 60733	k__Bacteria, p__Bacteroidetes, c__Flavobacteriia, o__Flavobacteriales, f__Flavobacteriaceae, g__Flavobacterium, s__	20	0	0	0	0	0	0	0	0	0	0	0	0	0	0	0	0	0	0	0	0	0	0	0	0	0	0	0	17	0	0	0	0	0	0	0	0	0	0	3	0	0	0	0	0	GTGCCAGCAGCCGCGGTAATACGGAGGATCCAAGCGTTATCCGGAATCATTGGGTTTAAAGGGTCCGTAGGCGGCTTTATAAGTCAGTGGTGAAATCCGGCAGCTTAACTGTCGAATTGCCATTGATACTGTAGGGCTTGAATTGTTGTGAA
f__Moraxellaceae, 60346	k__Bacteria, p__Proteobacteria, c__Gammaproteobacteria, o__Pseudomonadales, f__Moraxellaceae, g__, s__	5	0	0	0	0	0	0	0	0	0	0	0	0	0	0	0	0	0	0	0	0	0	0	0	0	0	0	3	0	1	0	1	0	0	0	0	0	0	0	0	0	0	0	0	0	AGCCACCGCGGTAATACAGAGGGTGCAACCGTTATCCGGAATTACTGGGCGTAAAGCGTGCGTAGGCGGCTTTTTAAGTCGGATGTGAAATCCCCGAGCTTAACTTGGGAATTGCATTCGATACTGGGAAGCTAGAGTATGGGAGAGGA
g__Acinetobacter, 60345	k__Bacteria, p__Proteobacteria, c__Gammaproteobacteria, o__Pseudomonadales, f__Moraxellaceae, g__Acinetobacter, s__	2	0	2	0	0	0	0	0	0	0	0	0	0	0	0	0	0	0	0	0	0	0	0	0	0	0	0	0	0	0	0	0	0	0	0	0	0	0	0	0	0	0	0	0	0	GCAGCCGCGGTAATACAGAGGGTGCGAGCGTTAATCGGATTTACTGGGCGTAAAGCGTGCGTAGGCGGCTTTTTAAGTCGGGATGTGAAATCCCCGAGCTTAACTTGGGAATTGCATTCGGTACTGGGAAGCTAGAGTATGGGAGAGG
g__Pseudomonas, 60329	k__Bacteria, p__Proteobacteria, c__Gammaproteobacteria, o__Pseudomonadales, f__Pseudomonadaceae, g__Pseudomonas, s__	194	0	0	0	0	0	0	0	0	0	1	0	0	0	0	0	0	0	1	0	1	0	0	8	0	28	6	14	0	21	0	55	41	2	1	0	1	7	2	0	0	0	0	0	5	GTGCCAGCAGCCGCGGTAATACAGAGGGTGCAAGCGTTAATCGGATTTACTGGGCGTAAAGCGTGCGTAGGCGGCTTTTTAAGTCGGATGTGAAATCCCCGAGCTTAACTTGGGAATTGCATTCGATACTGGGAAGCTAGAGTATGGGAGAG
g__Acinetobacter, 60325	k__Bacteria, p__Proteobacteria, c__Gammaproteobacteria, o__Pseudomonadales, f__Moraxellaceae, g__Acinetobacter, s__	41	0	0	0	0	0	0	0	0	0	0	0	0	0	0	0	0	0	0	0	0	0	0	1	0	0	4	0	2	0	0	19	11	2	0	0	0	2	0	0	0	0	0	0	0	TGTGCCAGCAGCCGCGGTAATACAGAGGGTGCGAGCGTTAATCGGATTTACTGGGCGTAAAGCGTGCGTAGGCGGCTTTTTAAGTCGGATGTGAAATCCCCGAGCTTAACTTGGGAATTGCATTCGATACTGGGAAGCTAGAGTATGGTAGAG
s__paradoxus, 58864	k__Bacteria, p__Proteobacteria, c__Betaproteobacteria, o__Burkholderiales, f__Comamonadaceae, g__Variovorax, s__paradoxus	1257	0	0	0	0	1	606	0	1	0	0	0	0	0	0	0	0	2	0	0	0	0	0	112	3	71	62	49	20	61	0	76	71	27	7	36	24	0	0	9	0	0	1	0	18	GTGCCAGCAGCCGCGGTAATACGTAGGGTGCAAGCGTTAATCGGAATTACTGGGCGTAAAGCGTGCGCAGGCGGTAATGTAAGACAGTTGTGAAATCCCCGGGCTCAACCTGGGAACTGCATCTGTGACTGCATTGCTGGAGTACGGCAGAG
c__Chloroplast, 52865	k__Bacteria, p__Cyanobacteria, c__Chloroplast, o__, f__, g__, s__	10	0	0	0	0	0	0	0	0	0	0	0	0	0	0	0	0	0	0	0	0	0	0	0	0	0	0	0	0	0	0	0	0	0	0	0	10	0	0	0	0	0	0	0	0	GTGCCAGCAGCCGCGGTAATACGGAGGATGCAAGCGTATTCCGGAATCACTGGGCGTAAAGCGTCTGTAGGTTGCTCAGTAAGTCTGCTGTTAAAGATTGGGGCTCAACCCCAAAGCAGCAGTGGAAACTACTAGGCTAGAGTATGGTAAG
f__Caulobacteraceae, 49192	k__Bacteria, p__Proteobacteria, c__Alphaproteobacteria, o__Caulobacterales, f__Caulobacteraceae, g__, s__	2	0	0	0	0	0	0	0	0	0	0	0	0	0	0	0	0	0	0	0	0	0	0	0	0	0	1	0	0	0	0	0	0	0	0	0	0	1	0	0	0	0	0	0	0	GTGCCAGCAGCCGCGGTAATACGAAGGGGGCTAGCGTTGCTCGGAATTACTGGGCGTAAAGGGAGCGTAGGCGGACATTTAAGTCAGGGGTGAAATCCCGGGGCTCAACCTCGGAACTGCCTTTGATACTGGGTGTCTTGAGTGTGATAGA
g__Pedobacter, 44075	k__Bacteria, p__Bacteroidetes, c__Sphingobacteriia, o__Sphingobacteriales, f__Sphingobacteriaceae, g__Pedobacter, s__	13	0	0	0	0	0	1	0	0	0	0	0	2	0	0	0	0	0	0	0	0	1	0	1	0	0	1	1	0	0	0	2	0	0	0	2	0	0	0	1	0	0	0	0	1	GTGCCAGCAGCCGCGGTAATACGGAGGATCCAAGCGTTATCCGGATTTATTGGGTTTAAAGGGTGCGTAGGCGGCCTATTAAGTCAGGGGTGAAAGACGGTAGCTCAACTATCGCAGTGCCCTTGATACTGATGGGCTTGAATACACTAGAG
o__Rhizobiales, 40511	k__Bacteria, p__Proteobacteria, c__Alphaproteobacteria, o__Rhizobiales, f__, g__, s__	130	0	0	0	0	0	0	0	0	0	0	0	0	0	0	0	0	130	0	0	0	0	0	0	0	0	0	0	0	0	0	0	0	0	0	0	0	0	0	0	0	0	0	0	0	AGCAGCCGCGGTAATACGAAGGGGGCTAGCGTTGTTCGGATTTACTGGGCGTAAAGCGCACGTAGGCGGGTCGTTAAGTCAGGGGGTGGAAATCCCGGAGCTCAACTCCGGAACTGCCTTTGATACTGGCGACCTTGAGGCCGGAAGAGGT
o__Sphingobacteriales, 40351	k__Bacteria, p__Bacteroidetes, c__Sphingobacteriia, o__Sphingobacteriales, f__, g__, s__	10	0	0	0	0	0	10	0	0	0	0	0	0	0	0	0	0	0	0	0	0	0	0	0	0	0	0	0	0	0	0	0	0	0	0	0	0	0	0	0	0	0	0	0	0	GCAGCCGCGGTAATACGAAGGATCCAAGCGTTGTCCGGATTTACTGGGTTTAAAGGGTGCGTAGGCGGACTCATAAGTCAGTGGTGAAAGCCTTCAGCTTAACTGAAGAACTGCCATTGAAACTGTGAGTCTCGAGTTCGGTTGAG
f__Comamonadaceae, 40205	k__Bacteria, p__Proteobacteria, c__Betaproteobacteria, o__Burkholderiales, f__Comamonadaceae, g__, s__	21	0	0	0	0	0	21	0	0	0	0	0	0	0	0	0	0	0	0	0	0	0	0	0	0	0	0	0	0	0	0	0	0	0	0	0	0	0	0	0	0	0	0	0	0	GCAGCCGCGGTAATACGTAGGGTGCAAGCGTTAATCGGAATTACTGGGCGTAAAGCGTGCGCAGGCGGTTCTATAAGACAGATGTGAAATCCCCGGGCTCAACCTGGGAACTGCATTTGTGACTGTAGAGCTAGAGTACGGTAGAGGG
g__Nocardia, 36906	k__Bacteria, p__Actinobacteria, c__Actinobacteria, o__Actinomycetales, f__Nocardiaceae, g__Nocardia, s__	3	0	0	0	0	0	0	0	0	0	0	0	0	0	0	0	0	0	0	0	0	0	0	1	0	0	0	0	0	0	0	0	0	0	1	0	0	0	0	1	0	0	0	0	0	GTGCCAGCAGCCGCGGTAATACGTAGGGTGCGAGCGTTGTCCGGAATTACTGGGCGTAAAGAGCTTGTAGGCGGTTCGTCGCGTCGTTCGTGAAAACTTGGGGCTCAACCCCAAGCTTGCGGGCGATACGGGCGGACTAGAGTACTGCAGG
g__Hyphomicrobium, 27497	k__Bacteria, p__Proteobacteria, c__Alphaproteobacteria, o__Rhizobiales, f__Hyphomicrobiaceae, g__Hyphomicrobium, s__	142	0	0	0	0	0	57	0	0	0	0	0	0	0	0	0	0	74	0	0	0	0	0	0	0	0	0	8	0	0	0	0	0	0	0	0	0	0	3	0	0	0	0	0	0	AGCAGCCGCGGTAATCGAAGGGGACTAGCGTTGTTCGGAATCGCTGGGCGTAAAGCGCACGTAGGCGGATATGCCAGTCAGGGGTGAAATCCCGGGGCTCAACCTCGGAACTGCCCTTGATACAGCATGTCTTGAGTCCGATAGAGGT
g__Leucobacter, 26311	k__Bacteria, p__Actinobacteria, c__Actinobacteria, o__Actinomycetales, f__Microbacteriaceae, g__Leucobacter, s__	665	0	0	0	0	0	664	1	0	0	0	0	0	0	0	0	0	0	0	0	0	0	0	0	0	0	0	0	0	0	0	0	0	0	0	0	0	0	0	0	0	0	0	0	0	AGCAGCCGCGGTAATACGTAGGGCGCAAGCGTTGTCCGGAATTATTGGGCGTAAAGAGCTCGTAGGCGGCTTGTCGCGTCTGCTGTGAAAACCCGGAGCTCAACTCCGGGCCTGCAGTGGGTACGGGCAGGCTAGAGTGCGGTAGGGGA
g__Aminobacter, 24111	k__Bacteria, p__Proteobacteria, c__Alphaproteobacteria, o__Rhizobiales, f__Phyllobacteriaceae, g__Aminobacter, s__	6750	40	31	60	0	2	4129	0	1	89	0	1	201	62	15	1	0	1518	0	3	112	3	0	115	0	22	48	24	3	38	6	28	53	0	7	7	0	39	16	47	16	4	1	1	7	AGCAGCCGCGGTAATACGAAGGGGGCTAGCGTTGTTCGGAATTACTGGGCGTAAAGCGCACGTAGGCGGATTGTTAAGTTAGGGGTGAAATCCCAGGGCTCAACCCTGGAACTGCCTCTAATACTGGCAATCTCGAGTCCGAGAGAGGT
c__Betaproteobacteria, 17331	k__Bacteria, p__Proteobacteria, c__Betaproteobacteria, o__, f__, g__, s__	23	0	0	0	0	0	2	0	0	0	0	0	0	0	0	0	0	21	0	0	0	0	0	0	0	0	0	0	0	0	0	0	0	0	0	0	0	0	0	0	0	0	0	0	0	GCAGCCGCGGTAATACGTAGGGTGCGAGCGTTAATCGGAATTACTGGGCGTAAAGCGTGCGCAGGCGGTTTTGTAAGACGGATGTGAAATCCCCGGGCTTAACCTGGGAACTGCATTTGTGACTGCAAGGCTAGAGTACGGCAGAGG
f__Sphingomonadaceae, 17329	k__Bacteria, p__Proteobacteria, c__Alphaproteobacteria, o__Sphingomonadales, f__Sphingomonadaceae, g__, s__	217	0	0	0	34	0	0	0	0	73	0	46	0	0	0	0	0	0	0	0	13	0	0	2	0	0	11	0	1	0	0	6	0	6	3	9	13	0	0	0	0	0	0	0	0	AGCAGCCGCGGTAATACGGAGGGAGCTAGCGTTGTTCGGAATTACTGGGCGTAAAGCGCACGTAGGCGGCTTTGTAAGTTAGAGGTGAAAGCCTGGAGCTTAACTCCAGAACTGCCTTTAAGACTGCATCGCTTGAATCCAGGAGAGGT
o__CW040, 17020	k__Bacteria, p__TM7, c__TM7-3, o__CW040, f__, g__, s__	5	0	0	0	0	0	0	0	0	0	0	0	0	0	0	0	0	0	0	0	0	0	0	0	0	0	0	0	0	0	0	0	0	5	0	0	0	0	0	0	0	0	0	0	0	GTGCCAGCAGCCGCGGTCATACGTAGGATCCGAGCGTTATCCGGAGTGACTGGGCGTAAAGGGTTGCGTAGGTGGTTCGATAAGCGAATAGTGAAATCTGGTGGCTCAACCATTCAGACTATTATTCGAACTGTTGGACTCGAGAGCAGAA
g__Bacillus, 14924	k__Bacteria, p__Firmicutes, c__Bacilli, o__Bacillales, f__Bacillaceae, g__Bacillus, s__	133	61	0	0	0	0	0	13	0	0	0	0	0	0	0	0	0	0	0	26	0	16	0	0	0	0	0	4	0	0	0	0	0	0	0	8	0	5	0	0	0	0	0	0	0	AGCAGCCGCGGTAATACGTAGGTGGCGAGCGTTATCCGGAATTATTGGGCGTAAAGCGCGCGCAGGCGGTCTCTTAAGTCTGATGTGAAATCTCGCGGCTCAACCGCGAGCGGCCATTGGAAACTGGGAGACTTGAGTGCAGAAGAGA
s__oleronius, 14592	k__Bacteria, p__Firmicutes, c__Bacilli, o__Bacillales, f__Bacillaceae, g__Bacillus, s__oleronius	31	0	0	0	0	0	0	0	0	29	0	0	0	0	0	2	0	0	0	0	0	0	0	0	0	0	0	0	0	0	0	0	0	0	0	0	0	0	0	0	0	0	0	0	0	AGCAGCCGCGGTAATACGTAGGTGGCAAGCGTTGTCCGGAATTATTGGGCGTAAAGCGCGCGCAGGCGGTTTCTTAAGTCTGATGTGAAATCTTGCGGCTCAACCGCAAGCGGCCATTGGAAACTGGNAGACTTGAGTGCAGAAGAGGA
g__Mycobacterium, 13233	k__Bacteria, p__Actinobacteria, c__Actinobacteria, o__Actinomycetales, f__Mycobacteriaceae, g__Mycobacterium, s__	5	0	0	0	0	0	5	0	0	0	0	0	0	0	0	0	0	0	0	0	0	0	0	0	0	0	0	0	0	0	0	0	0	0	0	0	0	0	0	0	0	0	0	0	0	GCAGCCGCGGTAATACGTAGGGTGCGAGCGTTGTCCGGAATTACTGGGCGTAAAGAGCTCGTAGGTGGTTTGTCGCGTTGTTCGTGAAAACTCACAGCTTAACTGTGGGCGTGCGGGCGATACGGGCAGACTAGAGTACTGTAGGGG
s__arupense, 13047	k__Bacteria, p__Actinobacteria, c__Actinobacteria, o__Actinomycetales, f__Mycobacteriaceae, g__Mycobacterium, s__arupense	11	0	0	0	0	0	3	0	0	0	0	0	3	0	0	0	0	0	0	0	0	0	0	0	0	0	0	0	0	0	0	0	0	0	5	0	0	0	0	0	0	0	0	0	0	AGCAGCCGCGGTAATACGTAGGGTGCGAGCGTTGTCCGGAATTACTGGGCGTAAAGAGCTCGTAGGTGGTTTGTCGCGTTGTCCGTGAAAACTCACAGCTTAACTGTGGGCGTGCGGGCGATACGGGCAGACTAGAGTACTGCAGGGG
g__Actinomyces, 12574	k__Bacteria, p__Actinobacteria, c__Actinobacteria, o__Actinomycetales, f__Actinomycetaceae, g__Actinomyces, s__	3	0	0	0	0	0	0	0	0	0	0	0	0	0	0	0	0	0	0	0	0	0	0	3	0	0	0	0	0	0	0	0	0	0	0	0	0	0	0	0	0	0	0	0	0	GTNNCAGCAGCCGCGGTAATACGTAGGGCGCGAGCGTTGTCCGGAATTATTGGGCGTAAAGGGCTTGTAGGCGGTTGGTCGCGTCTGCCGTGAAATCCTCTGGCTTAACTGGGGGCGTGCGGTGGGTACGGGCTGACTTGAGTGCGGTAGG
g__Actinomyces, 12560	k__Bacteria, p__Actinobacteria, c__Actinobacteria, o__Actinomycetales, f__Actinomycetaceae, g__Actinomyces, s__	4	0	0	0	0	0	0	0	0	0	0	0	0	0	0	0	0	0	0	0	0	0	0	0	0	0	0	0	0	0	0	0	0	0	0	4	0	0	0	0	0	0	0	0	0	GTGCCAGCAGCCGCGGTAATACGTAGGGCGCGAGCGTTGTCCGGAATTATTGGGCGTAAAGGGCTTGTAGGCGGTTGGTCGCGTCTGCCGTGAAATCCTCTGGCTCAGCTGGGGGCGTGCGGTGGGTACGGGCTGGCTTGAGTGCGGTAGG
s__quercina, 10196	k__Bacteria, p__Proteobacteria, c__Gammaproteobacteria, o__Enterobacteriales, f__Enterobacteriaceae, g__Brenneria, s__quercina	79	0	0	0	0	0	0	0	0	0	0	0	0	0	0	0	0	0	0	0	0	0	0	0	0	0	0	1	0	0	0	4	0	0	0	1	0	0	1	0	0	12	30	22	8	GTGCCAGCAGCCGCGGTAATACGGAGGGTGCAAGCGTTAATCGGAATGACTGGGCGTAAAGCGCACGCAGGCGGTTTGTTAAGTCAGATGTGAAATCCCCGAGCTTAACTTGGGAACTGCATTTGAAACTGGCAGGCTAGAGTCTTGTAGA
g__Pandoraea, 7184	k__Bacteria, p__Proteobacteria, c__Betaproteobacteria, o__Burkholderiales, f__Burkholderiaceae, g__Pandoraea, s__	164	0	0	0	0	0	13	0	0	0	0	0	0	0	0	0	0	36	0	0	0	0	0	8	0	0	0	0	53	5	0	0	0	0	43	0	0	0	0	4	0	0	0	2	0	AGCAGCCGCGGTAATACGTAGGGTGCAAGCGTTAATCGGAATTACTGGGCGTAAAGCGTGCGCAGGCGGTTTTGTAAGACGGATGTGAAATCCCCGGGCTCAACCTGGGAACTGCATTCGTGACTGCAAGGCTAGAGTATGGCAGAGGG
f__Comamonadaceae, 7128	k__Bacteria, p__Proteobacteria, c__Betaproteobacteria, o__Burkholderiales, f__Comamonadaceae, g__, s__	8	0	0	0	0	0	0	0	0	0	0	0	0	0	0	0	0	0	0	0	0	0	0	0	0	8	0	0	0	0	0	0	0	0	0	0	0	0	0	0	0	0	0	0	0	GTGCCAGCAGCCGCGGTAATACGTAGGGTGCAAGCGTTAATCGGAATTACTGGGCGTAAAGCGTGCGCAGGCGGTTGTGCAAGACAGATGTGAAATCCCCGGGCTTAACCTGGGAACTGCATTTGTGACTGCACGGCTGGAGTGCGGCAGA
g__Dechloromonas, 6693	k__Bacteria, p__Proteobacteria, c__Betaproteobacteria, o__Rhodocyclales, f__Rhodocyclaceae, g__Dechloromonas, s__	2	0	0	0	0	0	2	0	0	0	0	0	0	0	0	0	0	0	0	0	0	0	0	0	0	0	0	0	0	0	0	0	0	0	0	0	0	0	0	0	0	0	0	0	0	GTGCCAGCAGCCGCGGTAATACGTAGGGTGCGAGCGTTAATCGGAATTACTGGGCGTAAAGCGTGCGCAGGCGGTTTCGTAAGACAGAGGTGAAATCCCCGGGCTCAACCTGGGAACTGCCTTTGTGACTGCGAGGCTAGAGTACGGCAGAG
g__Mesorhizobium, 5162	k__Bacteria, p__Proteobacteria, c__Alphaproteobacteria, o__Rhizobiales, f__Phyllobacteriaceae, g__Mesorhizobium, s__	5	0	0	0	0	0	0	0	0	0	0	0	0	0	0	0	0	0	0	0	0	0	0	0	0	0	5	0	0	0	0	0	0	0	0	0	0	0	0	0	0	0	0	0	0	GTGCCAGCAGCCGCGGTAATACGAAGGGGGCTAGCGTTGTTCGGAATTACTGGGCGTAAAGCGCACGTAGGCGGATATTTAAGTCAGGGGTGAAATCCCAGAGCTCAACTCTGGAACTGCCTTTGATACTGGGTATCTAGAGTATGGAAGA
o__Rhizobiales, 4760	k__Bacteria, p__Proteobacteria, c__Alphaproteobacteria, o__Rhizobiales, f__, g__, s__	220	0	0	0	0	0	28	0	0	0	0	0	2	0	0	0	0	190	0	0	0	0	0	0	0	0	0	0	0	0	0	0	0	0	0	0	0	0	0	0	0	0	0	0	0	AGCAGCCGCGGTAATACGAAGGGGGCTAGCGTTGTTCGGAATCACTGGGCGTAAAGCGCACGTAGGCGGATCTTTAAGTCAGGGGTGAAATCCCAGAGCTCAACTCTGGAACTGCCTTTGATACTGGGGATCTTGAGTCCGGAAGAGGT
s__zavarzinii, 4632	k__Bacteria, p__Proteobacteria, c__Alphaproteobacteria, o__Rhizobiales, f__Hyphomicrobiaceae, g__Hyphomicrobium, s__zavarzinii	2	0	0	0	0	0	0	0	0	0	0	0	0	0	0	0	0	2	0	0	0	0	0	0	0	0	0	0	0	0	0	0	0	0	0	0	0	0	0	0	0	0	0	0	0	GCAGCCGCGGTAATACGAAGGGGGCTAGCGTTGTTCGGAATTACTGGGCGTAAAGCGCACGTAGGCGGATTGCTAAGTCAGGGGTGAAATCCCGGGGCTCAACCTCGGAACTGCCTTTGATACTGACAGTCTTGAGTCCGGAAGAGG
s__columnare, 2325	k__Bacteria, p__Bacteroidetes, c__Flavobacteriia, o__Flavobacteriales, f__Flavobacteriaceae, g__Flavobacterium, s__columnare	3774	0	0	0	0	0	4	0	0	0	0	0	0	0	0	0	0	0	0	0	0	0	0	10	0	0	0	0	749	1	0	2	0	6	2831	0	9	1	0	156	0	0	2	2	1	CGTGCCAGCAGCCGCGGTAATACGGAGGATCCAAGCGTTATCCGGAATCATTGGGTTTAAAGGGTCCGTAGGCGGTTTTATAAGTCAGTGGTGAAATCTGGTCGCTCAACGATCAAACGGCCATTGATACTGTAAGACTTGAATTACTTGGAA
s__ramosa, 1503863	k__Bacteria, p__Proteobacteria, c__Gammaproteobacteria, o__Xanthomonadales, f__Sinobacteraceae, g__Nevskia, s__ramosa	46	0	0	0	0	0	0	33	0	0	0	0	0	0	0	0	0	0	0	0	0	0	0	0	0	0	10	0	0	0	0	0	0	0	3	0	0	0	0	0	0	0	0	0	0	AGCAGCCGCGGTAATACAGAGGGTGCTAGCGTTAATCGGATTTACTGGGCGTAAAGCGTGCGTAGGCGGTTTGATAAGTCGATTGTGAAAGCCCCGGGCTTAACCTGGGAATTGCGGTCGATACTGTCAGACTCGAAAACGGTAGAGG
g__Porphyromonas, 970138	k__Bacteria, p__Bacteroidetes, c__Bacteroidia, o__Bacteroidales, f__Porphyromonadaceae, g__Porphyromonas, s__	58	0	0	0	0	36	0	0	0	0	0	0	0	0	0	0	0	0	0	0	0	0	0	0	0	0	0	3	1	0	0	0	0	0	0	0	0	10	0	8	0	0	0	0	0	AGCAGCCGCGGTAATACGGAGGATGCGAGCGTTATCCGGATTTATTGGGTTTAAAGGGTGCGTAGGCGGCCTGTTAAGTCAGCGGTGAAATCTAGGAGCTTAACTCCTAAATTGCCATTGATACTGGCGGGCTTGAGTGTAGATGAGGT
f__Pseudoalteromonadaceae, 838851	k__Bacteria, p__Proteobacteria, c__Gammaproteobacteria, o__Vibrionales, f__Pseudoalteromonadaceae, g__, s__	6835	0	0	0	0	0	0	0	0	0	0	0	0	0	0	0	0	0	0	0	0	0	0	197	156	515	651	528	62	833	51	1191	1032	359	16	145	122	321	392	4	36	23	9	5	187	CGTGCCAGCAGCCGCGGTAATACGGAGGGTGCAAGCGTTAATCGGAATTACTGGGCGTAAAGCGCATGCAGGTGGTTTGTTAAGTCAGATGTGAAAGCCCTGGGCTCAACCTAGGAATCGCATTTGAAACTGACAAGCTAGAGTACTGTAGAG
f__Comamonadaceae, 834138	k__Bacteria, p__Proteobacteria, c__Betaproteobacteria, o__Burkholderiales, f__Comamonadaceae, g__, s__	1279	0	0	0	0	0	3	0	0	0	0	0	0	0	0	0	0	0	0	0	0	0	0	31	33	72	102	33	44	77	8	225	121	47	232	48	21	67	49	10	19	0	1	0	36	GTGCCAGCAGCCGCGGTAATACGTAGGGTGCGAGCGTTAATCGGAATTACTGGGCGTAAAGCGTGCGCAGGCGGTTATGTAAGACAGATGTGAAATCCCCGGGCTCAACCTGGGACCTGCATTTGTGACTGCATAGCTAGAGTACGGTAGAG
g__Flavobacterium, 1574901	k__Bacteria, p__Bacteroidetes, c__Flavobacteriia, o__Flavobacteriales, f__Flavobacteriaceae, g__Flavobacterium, s__	107	0	0	0	0	0	0	0	0	0	0	0	0	0	0	0	0	0	0	0	0	0	0	0	0	0	0	0	107	0	0	0	0	0	0	0	0	0	0	0	0	0	0	0	0	GTGCCAGCAGCCGCGGTAATACGGAGGATCCAAGCGTTATCCGGAATCATTGGGTTTAAAGGGTCCGTAGGCGGCTTTATAAGTCAGTGGTGAAAGCCCATCGCTCAACGATGGAACGGCCATTGATACTGTAGAGCTTGAATTATTAGGA
f__Comamonadaceae, 818509	k__Bacteria, p__Proteobacteria, c__Betaproteobacteria, o__Burkholderiales, f__Comamonadaceae, g__, s__	2	0	0	0	0	0	2	0	0	0	0	0	0	0	0	0	0	0	0	0	0	0	0	0	0	0	0	0	0	0	0	0	0	0	0	0	0	0	0	0	0	0	0	0	0	GCAGCCGCGGTAATACGTAGGGTGCAAGCGTTAATCGGAATTACTGGGCGTAAAGCGTGCGCAGGCGGTTTTGTAAGACAGAGGTGAAATCCCCGGGCTTAACCTGGGAACTGCCTTTGTGACTGCAAGGCTTGAGTGCGGCAGAGG
g__Comamonas, 808203	k__Bacteria, p__Proteobacteria, c__Betaproteobacteria, o__Burkholderiales, f__Comamonadaceae, g__Comamonas, s__	4	0	0	0	0	0	0	0	0	0	0	0	0	0	0	0	0	0	0	0	0	0	0	2	0	0	0	0	0	0	0	0	0	0	2	0	0	0	0	0	0	0	0	0	0	GTGCCAGCAGCCGCGGTAATACGTAGGGTGCGAGCGTTAATCGGAATTACTGGGCGTAAAGCGTGCGCAGGCGGTTTTGTAAGACAGTGGTGAAATCCCCGGGCTCAACCTGGGAACTGCCATTGTGACTGCAAGGCTGGAGTGCGGCAGAG
f__Rhodocyclaceae, 1141377	k__Bacteria, p__Proteobacteria, c__Betaproteobacteria, o__Rhodocyclales, f__Rhodocyclaceae, g__, s__	13	0	0	0	0	0	8	0	0	0	0	0	0	0	0	0	0	2	0	0	0	0	0	1	1	0	0	0	0	0	0	0	0	0	1	0	0	0	0	0	0	0	0	0	0	AGCAGCCGCGGTAATACGTAGGGTGCGAGCGTTAATCGGAATTACTGGGCGTAAAGCGTGCGCAGGCGGTTATGTAAGACAGATGTGAAATCCCCGGGCTCAACCTGGGAACTGCATTTGTGACTGCATAGCTTGAGTGCGGCAGAGG
g__Rubrivivax, 1134692	k__Bacteria, p__Proteobacteria, c__Betaproteobacteria, o__Burkholderiales, f__Comamonadaceae, g__Rubrivivax, s__	31	0	0	0	0	0	13	0	0	0	0	0	0	0	0	0	0	18	0	0	0	0	0	0	0	0	0	0	0	0	0	0	0	0	0	0	0	0	0	0	0	0	0	0	0	AGCAGCCGCGGTAATACGTAGGGTGCGAGCGTTAATCGGAATTACTGGGCGTAAAGCGTGCGCAGGCGGTTGTGCAAGACAGGTGTGAAATCCCCGGGCTTAACCTGGGAACTGCACTTGTGACTGCACAGCTGGAGTGCGGCAGAGGG
f__Cytophagaceae, 1639372	k__Bacteria, p__Bacteroidetes, c__Cytophagia, o__Cytophagales, f__Cytophagaceae, g__, s__	23	0	0	0	0	0	0	0	0	0	0	0	0	0	0	0	0	0	0	0	0	0	0	20	0	0	0	0	3	0	0	0	0	0	0	0	0	0	0	0	0	0	0	0	0	GTGCCAGCAGCCGCGGTAATACGTAGGTGGCAAGCGTTGTCCGGATTTATTGGGTTTAAAGGGTGCGTAGGCGGCCTTGTAAGTCAGCGGTGAAAGTTTACAGCTTAACTGTAAGACTGCCATTGATACTGCAGGGCTTGAATTCAAACGA
f__Rhodospirillaceae, 1640195	k__Bacteria, p__Proteobacteria, c__Alphaproteobacteria, o__Rhodospirillales, f__Rhodospirillaceae, g__, s__	1180	0	0	0	0	1	629	0	1	1	10	8	181	2	0	0	0	242	15	51	34	0	0	0	0	0	0	0	1	0	0	0	0	1	1	0	0	0	0	2	0	0	0	0	0	AGCAGCCGCGGTAAGACGAAGGGGGCTAGCGTTGTTCGGAATTACTGGGCGTAAAGCGAGTGTAGGTGGTTGTCATAGTCAGGTGTGAAAGCCTTGAGCTCAACTCAAGAAATGCACTTGATACTGGGCGACTAGAGGACCGGAGAGGA
g__Runella, 1656943	k__Bacteria, p__Bacteroidetes, c__Cytophagia, o__Cytophagales, f__Cytophagaceae, g__Runella, s__	13	0	0	0	0	0	0	0	0	0	0	0	0	0	0	0	0	0	0	0	0	0	0	13	0	0	0	0	0	0	0	0	0	0	0	0	0	0	0	0	0	0	0	0	0	GTGCCAGCAGCCGCGGTAATACGTAGGTGGCAAGCGTTGTCCGGATTTATTGGGTTTAAAGGGTGCGTAGGTGGTTTAATAAGTCAGTGGTGAAAGCTGGTTGCTCAACAATCAAGTTGCCATTGATACTGTTAGACTTGAGAGAAGTGGA
o__Rhizobiales, 859052	k__Bacteria, p__Proteobacteria, c__Alphaproteobacteria, o__Rhizobiales, f__, g__, s__	2	0	0	0	0	0	1	0	0	0	0	0	1	0	0	0	0	0	0	0	0	0	0	0	0	0	0	0	0	0	0	0	0	0	0	0	0	0	0	0	0	0	0	0	0	GCAGCCGCGGTAATACGAAGGGGGCTAGCGTTGCTCGGAATCACTGGGCGTAAAGCGCACGTAGGCGGATCTTTAAGTCAGAGGTGAAATCCCAAGGCTCAACCTTGGAACTGCCTTTGATACTGGGGATCTCGAGTCCGGAAGAGG
o__SBla14, 816501	k__Bacteria, p__Proteobacteria, c__Betaproteobacteria, o__SBla14, f__, g__, s__	12	0	0	0	0	0	12	0	0	0	0	0	0	0	0	0	0	0	0	0	0	0	0	0	0	0	0	0	0	0	0	0	0	0	0	0	0	0	0	0	0	0	0	0	0	GCAGCCGCGGTAATACGTAGGGTGCGAGCGTTAATCGGAATTACTGGGCGTAAAGCGTGCGCAGGCGGTTTTGTAAGACAGGTGTGAAATCCCCGGGCTTAACCTGGGAACTGCACTTGTGACTGCAAGGCTAGAGTGCGGCAGAGG
g__Shewanella, 831590	k__Bacteria, p__Proteobacteria, c__Gammaproteobacteria, o__Alteromonadales, f__Shewanellaceae, g__Shewanella, s__	23	0	0	0	0	0	2	0	0	0	0	0	0	0	0	0	0	14	0	0	0	0	0	0	0	0	0	0	0	0	0	0	0	0	7	0	0	0	0	0	0	0	0	0	0	AGCAGCCGCGGTAATACGGAGGGTCCGAGCGTTAATCGGAATTACTGGGCGTAAAGCGTGCGCAGGCGGTTTGTTAAGCGAGATGTGAAAGCCCTGGGCTCAACCTAGGAATAGCATTTCGAACTGACAAACTAGAGTCTTGTAGAGG
g__Mycoplana, 1126769	k__Bacteria, p__Proteobacteria, c__Alphaproteobacteria, o__Caulobacterales, f__Caulobacteraceae, g__Mycoplana, s__	446	98	0	0	0	0	54	0	0	0	0	0	63	0	1	0	0	0	0	0	0	1	1	79	0	0	2	0	0	0	0	0	0	0	0	0	0	3	0	139	0	0	1	4	0	GTGCCAGCAGCCGCGGTAATACGAAGGGGGCTAGCGTTGCTCGGAATTACTGGGCGTAAAGGGAGCGTAGGCGGACATTTAAGTCAGGGGTGAAATCCCGGAGCTCAACTTCGGAACTGCCTTTGATACTGGATGTCTTGAGTGTGAGAGAG
g__Flavobacterium, 1134918	k__Bacteria, p__Bacteroidetes, c__Flavobacteriia, o__Flavobacteriales, f__Flavobacteriaceae, g__Flavobacterium, s__	38	0	0	0	0	0	0	0	0	0	0	0	0	0	0	0	0	0	0	0	0	0	0	0	0	0	0	0	38	0	0	0	0	0	0	0	0	0	0	0	0	0	0	0	0	GTGCCAGCAGCCGCGGTAATACGGAGGATCCAAGCGTTATCCGGAATCATTGGGTTTAAAGGGTCCGTAGGCGGTTTAGTAAGTCAGTGGTGAAAGCCCATCGCTCAACGATGGAACGGCCATTGATACTGCTAGACTTGAATTATTAGGA
g__Methylobacterium, 1082552	k__Bacteria, p__Proteobacteria, c__Alphaproteobacteria, o__Rhizobiales, f__Methylobacteriaceae, g__Methylobacterium, s__	23	7	1	0	0	4	0	1	0	0	0	3	0	0	0	0	1	0	2	3	0	1	0	0	0	0	0	0	0	0	0	0	0	0	0	0	0	0	0	0	0	0	0	0	0	GCAGCCGCGGTAATACGAAGGGGGCTAGCGTTGCTCGGAATCACTGGGCGTAAAGGGCGCGTAGGCGGCCTTGTAAGTTGGGGGTGAAGCCCGTGGCTCAACCACGGAATTGCCTTCGATACTGCTTGGCTTGAGTGTGGTAGAGGT
f__Comamonadaceae, 1146188	k__Bacteria, p__Proteobacteria, c__Betaproteobacteria, o__Burkholderiales, f__Comamonadaceae, g__, s__	23	0	0	0	0	0	22	0	0	0	0	0	0	0	0	0	0	1	0	0	0	0	0	0	0	0	0	0	0	0	0	0	0	0	0	0	0	0	0	0	0	0	0	0	0	AGCAGCCGCGGTAATACGTAGGGTGCGAGCGTTAATCGGAATTACTGGGCGTAAAGCGTGCGCAGGCGGTGATGTAAGACAGATGTGAAATCCCCGGGCTCAACCTGGGAACTGCCTTTGTGACTGCATAACTCGAGTACGGCAGAGGG
f__Comamonadaceae, 651643	k__Bacteria, p__Proteobacteria, c__Betaproteobacteria, o__Burkholderiales, f__Comamonadaceae, g__, s__	10484	0	0	0	0	0	11	0	1	0	0	0	0	0	0	0	0	60	0	0	0	0	0	222	0	0	18	0	707	0	1	8	0	0	8627	2	0	20	1	719	1	3	11	65	7	GTGCCAGCAGCCGCGGTAATACGTAGGGTGCAAGCGTTAATCGGAATTACTGGGCGTAAAGCGTGCGCAGGCGGTTATGCAAGACAGAGGTGAAATCCCCGGGCTCAACCTGGGAACTGCCTTTGTGACTGCATAGCTAGAGTACGGCAGAG
g__Novosphingobium, 1142742	k__Bacteria, p__Proteobacteria, c__Alphaproteobacteria, o__Sphingomonadales, f__Sphingomonadaceae, g__Novosphingobium, s__	2	0	0	0	0	0	0	0	0	0	0	0	0	0	0	0	0	0	0	0	0	0	0	0	0	0	0	0	0	0	0	0	0	0	2	0	0	0	0	0	0	0	0	0	0	GTGCCAGCAGCCGCGGTAATACGGAGGGAGCTAGCGTTGTTCGGAATTACTGGGCGTAAAGCGCACGTAGGCGGTTACTCAAGTCAGAGGTGAAAGCCCGGGGCTCAACCCCGGAACTGCCTTTGAAACTAGGTAGCTAGAATCCTGGAGAG
s__gilardii, 1842323	k__Bacteria, p__Proteobacteria, c__Betaproteobacteria, o__Burkholderiales, f__Oxalobacteraceae, g__Cupriavidus, s__gilardii	10	0	0	0	0	10	0	0	0	0	0	0	0	0	0	0	0	0	0	0	0	0	0	0	0	0	0	0	0	0	0	0	0	0	0	0	0	0	0	0	0	0	0	0	0	GCAGCCGCGGTAATACGTAGGGTGCGAGCGTTAATCGGAATTACTGGGCGTAAAGCGTGCGCAGGCGGTTTTGTAAGACAGGCGTGAAATCCCCGGGCTTAACCTGGGAATGGCGCTTGTGACTGCAAGGCTAGAGTGCGTCAGAGG
g__Limnohabitans, 1855596	k__Bacteria, p__Proteobacteria, c__Betaproteobacteria, o__Burkholderiales, f__Comamonadaceae, g__Limnohabitans, s__	16	0	0	0	0	0	3	0	0	0	0	1	0	0	0	0	0	7	1	0	0	0	0	1	0	0	0	0	0	0	0	0	0	0	0	0	0	1	0	2	0	0	0	0	0	AGCAGCCGCGGTAATACGTAGGGTGCGAGCGTTAATCGGAATTACTGGGCGTAAAGCGTGCGCAGGCGGTTGTGTAAGACAGATGTGAAATCCCCGGGCTCAACCTGGGAACTGCATTTGTGACTGCACAGCTAGAGTGCGGCAGAGG
f__Methylocystaceae, 1121839	k__Bacteria, p__Proteobacteria, c__Alphaproteobacteria, o__Rhizobiales, f__Methylocystaceae, g__, s__	2	0	0	0	0	0	0	0	0	0	0	0	2	0	0	0	0	0	0	0	0	0	0	0	0	0	0	0	0	0	0	0	0	0	0	0	0	0	0	0	0	0	0	0	0	GCAGCCGCGGTAATACGAAGGGGGCTAGCGTTGTTCGGATTTACTGGGCGTAAAGCGCACGTAGGCGGATCTTTAAGTCAGGGGTGAAATGCCGGAGCTCAACTTCGGAACTGCCTTTGATACTGGAGATCTTGAGTTCGAGAGAGG
o__Rhizobiales, 1858797	k__Bacteria, p__Proteobacteria, c__Alphaproteobacteria, o__Rhizobiales, f__, g__, s__	6	0	0	0	0	0	0	0	0	0	0	0	0	0	0	0	1	3	1	0	1	0	0	0	0	0	0	0	0	0	0	0	0	0	0	0	0	0	0	0	0	0	0	0	0	GCAGCCGCGGTAATACGAAGGGGGCTAGCGTTGCTCGGAATCACTGGGCGTAAAGGGCGCGTAGGCGGACTTTTAAGTCGGAGGTGAAAGCCCAGGGCTCAGCCCTGGAATTGCCTTCGATACTGGGAGTCTTGAGTTCGGAAGAGG
f__Comamonadaceae, 1879449	k__Bacteria, p__Proteobacteria, c__Betaproteobacteria, o__Burkholderiales, f__Comamonadaceae, g__, s__	2	0	0	0	0	0	0	0	0	0	0	0	0	0	0	0	0	0	0	0	0	0	0	0	0	2	0	0	0	0	0	0	0	0	0	0	0	0	0	0	0	0	0	0	0	AGCCGCCGCGGTAATACGTAGGGTGCGAGCGTTAATCGGAATTACTGGGCGTAAAGCGTGCGCAGGCGGTTATATAAGACAGTTGTGAAATCCCCGGGCTTAACCTGGGAACTGCATCTGTGACTGTATAGCTAGAGTACGGCAGAGG
g__Methylibium, 783687	k__Bacteria, p__Proteobacteria, c__Betaproteobacteria, o__Burkholderiales, f__Comamonadaceae, g__Methylibium, s__	20	0	0	0	0	0	5	0	0	0	0	0	0	0	0	0	0	15	0	0	0	0	0	0	0	0	0	0	0	0	0	0	0	0	0	0	0	0	0	0	0	0	0	0	0	GCAGCCGCGGTAATACGTAGGGTGCAAGCGTTAATCGGAATTACTGGGCGTAAAGCGTGCGCAGGCGGCTTTGCAAGACAGATGTGAAATCCCCGGGCTCAACCTGGGAACTGCATTTGTGACTGCATGGCTAGAGTACGGTAGAGG
g__Ramlibacter, 1898675	k__Bacteria, p__Proteobacteria, c__Betaproteobacteria, o__Burkholderiales, f__Comamonadaceae, g__Ramlibacter, s__	284	0	0	0	0	0	256	0	0	0	0	0	24	0	0	0	0	0	0	0	0	0	0	0	0	0	0	0	0	0	0	0	0	0	2	0	0	0	0	2	0	0	0	0	0	AGCAGCCGCGGTAATACGTAGGGTGCAAGCGTTAATCGGAATTACTGGGCGTAAAGCGTGCGCAGGCGGTTATGTAAGACAGGTGTGAAATCCCCGGGCTTAACCTGGGAACTGCATTTGTGACTGCATAGCTAGAGTACGGTAGAGGG
g__Lautropia, 1921813	k__Bacteria, p__Proteobacteria, c__Betaproteobacteria, o__Burkholderiales, f__Burkholderiaceae, g__Lautropia, s__	35	0	0	0	0	35	0	0	0	0	0	0	0	0	0	0	0	0	0	0	0	0	0	0	0	0	0	0	0	0	0	0	0	0	0	0	0	0	0	0	0	0	0	0	0	GCAGCCGCGGTAATACGTAGGGTGCGAGCGTTAATCGGAATTACTGGGCGTAAAGAGTGCGCAGGCGGTTTTGCAAGACCGATGTGAAATCCCCGGGCTTAACCTGGGAACTGCATTGGTGACTGCAAGGCTAGAGTGTGTCAGAGG
f__Solirubrobacteraceae, 960234	k__Bacteria, p__Actinobacteria, c__Thermoleophilia, o__Solirubrobacterales, f__Solirubrobacteraceae, g__, s__	3	0	0	0	0	0	0	0	0	0	0	0	0	0	0	0	0	0	0	0	0	0	0	0	0	0	0	0	0	0	0	0	0	0	0	0	3	0	0	0	0	0	0	0	0	GTGCCAGCAGCCGCGGTAATACGTAGGGGGCAAGCGTTGTCCGGAATCATTGGGCGTAAAGCGCGTGTAGGCGGTTCAGTAAGTCTGCTGTGAAAGTCCAGGGCTCAACCCTGGGATGCCGGTGGATACTGCTGGGCTAGAGTACGGAAGA
o__Actinomycetales, 686752	k__Bacteria, p__Actinobacteria, c__Actinobacteria, o__Actinomycetales, f__, g__, s__	2	0	0	0	0	0	0	0	0	0	0	0	0	0	0	0	0	0	0	0	0	0	0	0	0	2	0	0	0	0	0	0	0	0	0	0	0	0	0	0	0	0	0	0	0	GTGCCAGCAGCCGCGGTAATACGTAGGGCGCAAGCGTTGTCCGGATTTATTGGGCGTAAAGAGCTCGTAGGCGGTTTGTCGCGTCTGCTGTGAAAACCTGGGGCTTAACCCCGGGCCTGCAGTGGGTACGGGCAGACTAGAGTGCGGTAGG
f__Sphingomonadaceae, 836331	k__Bacteria, p__Proteobacteria, c__Alphaproteobacteria, o__Sphingomonadales, f__Sphingomonadaceae, g__, s__	6	0	0	0	0	0	6	0	0	0	0	0	0	0	0	0	0	0	0	0	0	0	0	0	0	0	0	0	0	0	0	0	0	0	0	0	0	0	0	0	0	0	0	0	0	GCAGCCGCGGTAATACGGAGGGGGCTAGCGTTGTTCGGAATTACTGGGCGTAAAGCGCACGTAGGCGGCTATTCAAGTCAGAGGTGAAAGCCTGGAGCTCAACTCCAGAACTGCCTTTGAAACTAGATAGCTAGAATCATGGAGAG
f__Enterobacteriaceae, 1951826	k__Bacteria, p__Proteobacteria, c__Gammaproteobacteria, o__Enterobacteriales, f__Enterobacteriaceae, g__, s__	31	2	2	1	2	1	0	5	0	2	1	2	0	1	1	3	2	0	2	0	0	0	4	0	0	0	0	0	0	0	0	0	0	0	0	0	0	0	0	0	0	0	0	0	0	AGCAGCCGCGGTAATACGGAGGGTGCAAGCGTTAATCGGAATTACTGGGCGTAAAGCGCACGCAGGCGGTTTGTTAAGTCAGATGTGAAATCCCCGGGCTCAACCTGGGAACTGCATCTGATACTGGCAAGCTTGAGTCTCGTAGGGG
f__Beijerinckiaceae, 1977617	k__Bacteria, p__Proteobacteria, c__Alphaproteobacteria, o__Rhizobiales, f__Beijerinckiaceae, g__, s__	6	0	0	0	0	0	0	0	0	0	0	0	0	0	0	0	0	6	0	0	0	0	0	0	0	0	0	0	0	0	0	0	0	0	0	0	0	0	0	0	0	0	0	0	0	GCAGCCGCGGTAATACGAAGGGGGCTAGCGTTGCTCGGAATCACTGGGCGTAAAGGGCGCGTAGGCGGCCGATCAAGTCAGAGGTGAAAGCCCAAGGCTCAACCTTGGAATTGCCTTTGATACTGTTTGGCTCGAGACCGGAAGAGG
f__Chitinophagaceae, 1991834	k__Bacteria, p__Bacteroidetes, c__[Saprospirae], o__[Saprospirales], f__Chitinophagaceae, g__, s__	2	0	0	0	0	0	0	0	0	0	0	0	0	0	0	0	0	0	0	0	0	0	0	0	0	0	0	0	1	0	0	1	0	0	0	0	0	0	0	0	0	0	0	0	0	GTGCCAGCAGCCGCGGTAATACGGAGGGTGCAAGCGTTATCCGGATTCACTGGGTTTAAAGGGTGCGTAGGTGGGCAGGTAAGTCAGTGGTGAAATCCCCGAGCTTAACTTGGGAACTGCCATTGATACTATCTGTCTTGAATTCTCTGGA
g__Mycoplana, 1994485	k__Bacteria, p__Proteobacteria, c__Alphaproteobacteria, o__Caulobacterales, f__Caulobacteraceae, g__Mycoplana, s__	7	2	0	0	0	0	2	0	0	0	0	0	3	0	0	0	0	0	0	0	0	0	0	0	0	0	0	0	0	0	0	0	0	0	0	0	0	0	0	0	0	0	0	0	0	GCAGCCGCGGTAATACGAAGGGGGCTAGCGTTGCTCGGAATTACTGGGCGTAAAGGGAGCGTAGGCGGACATTTAAGTCAGGGGTGAAATCCCGGAGCTCAACTCCGGAACTGCCTTTGATACTGGGTGTCTTGAGTGTGAGAGAGG
g__Rubrivivax, 721703	k__Bacteria, p__Proteobacteria, c__Betaproteobacteria, o__Burkholderiales, f__Comamonadaceae, g__Rubrivivax, s__	3	0	0	0	0	0	3	0	0	0	0	0	0	0	0	0	0	0	0	0	0	0	0	0	0	0	0	0	0	0	0	0	0	0	0	0	0	0	0	0	0	0	0	0	0	GCAGCCGCGGTAATACGTAGGGTGCAAGCGTTAATCGGAATTACTGGGCGTAAAGCGTGCGCAGGCGGTTATGCAAGACAGATGTGAAATCCCCGGGCTTAACCTGGGAACTGCATTTGTGACTGCATAGCTAGAGTGCGGCAGAGG
g__Cellulosimicrobium, 1123395	k__Bacteria, p__Actinobacteria, c__Actinobacteria, o__Actinomycetales, f__Promicromonosporaceae, g__Cellulosimicrobium, s__	17	0	0	0	0	0	0	0	0	0	0	0	0	0	0	0	0	0	0	10	0	7	0	0	0	0	0	0	0	0	0	0	0	0	0	0	0	0	0	0	0	0	0	0	0	GCAGCCGCGGTAATACGTAGGGCGCAAGCGTTGTCCGGAATTATTGGGCGTAAAGAGCTCGTAGGCGGTTTGTCGCGTCTGGTGTGAAAACTCGAGGCTCAACCTCGAGCTTGCATCGGGTACGGGCAGACTAGAGTGCGGTAGGGG
o__Actinomycetales, 2094563	k__Bacteria, p__Actinobacteria, c__Actinobacteria, o__Actinomycetales, f__, g__, s__	2	0	0	0	0	0	1	0	0	0	0	0	0	0	0	0	0	1	0	0	0	0	0	0	0	0	0	0	0	0	0	0	0	0	0	0	0	0	0	0	0	0	0	0	0	GCAGCCGCGGTAATACGTAGGGCGCAAGCGTTATCCGGAATTATTGGGCGTAAAGAGCTCGTAGGCGGTTTGTCACGTCTGCTGTGAAATCCCGAGGCTCAACCTCGGGCCTGCAGTGGGTACGGGCAGACTAGAGTGTGGTAGAGGAG
f__Cytophagaceae, 2203624	k__Bacteria, p__Bacteroidetes, c__Cytophagia, o__Cytophagales, f__Cytophagaceae, g__, s__	6	0	0	0	0	0	0	0	0	0	0	0	0	0	0	0	0	0	0	0	0	0	0	0	0	0	0	6	0	0	0	0	0	0	0	0	0	0	0	0	0	0	0	0	0	GTGCCAGCAGCCGCGGTAATACGGAGGGTGCAAGCGTTGTCCGGATTCATTGGGTTTAAAGGGTGCGCAGGCGGGACATTAAGTCAGGGGTGAAAGACGGTTGCTCAACAATCGCAGTGCCTTTGATACTGGTGTTCTTGGGTGACCTTGA
f__Oxalobacteraceae, 2209903	k__Bacteria, p__Proteobacteria, c__Betaproteobacteria, o__Burkholderiales, f__Oxalobacteraceae, g__, s__	18	0	0	0	0	0	0	0	0	0	0	0	0	0	0	0	0	0	0	0	0	0	0	1	0	0	0	0	3	0	0	0	0	0	4	0	0	0	0	10	0	0	0	0	0	GTGCCAGCAGCCGCGGTAATACGTAGGGTGCAAGCGTTAATCGGAATTACTGGGCGTAAAGCGTGCGCAGGCGGTTTTATAAGACAGAGGTGAAATCCCCGGGCTCAACCTGGGAACTGCCTTTGTGACTGTAAGGCTAGAGTGTGTCAGAG
f__Sphingomonadaceae, 806010	k__Bacteria, p__Proteobacteria, c__Alphaproteobacteria, o__Sphingomonadales, f__Sphingomonadaceae, g__, s__	7	0	0	0	0	0	0	0	0	0	0	0	0	0	0	0	0	0	0	0	0	0	0	0	0	0	0	0	1	0	0	6	0	0	0	0	0	0	0	0	0	0	0	0	0	GTGCCAGCAGCCGCGGTAATACGGAGGGAGCTAGCGTTGTTCGGAATTACTGGGCGTAAAGCGCACGTAGGCGGTTACTCAAGTCAGAGGTGAAAGCCCGGGGCTCAACCCCGGAACTGCCTTTGAAACTAGGTGACTAGAATCTTGGAGAG
f__Neisseriaceae, 933546	k__Bacteria, p__Proteobacteria, c__Betaproteobacteria, o__Neisseriales, f__Neisseriaceae, g__, s__	426	0	38	0	0	0	0	0	0	0	0	0	0	0	0	0	0	0	0	0	0	0	0	1	34	26	28	19	3	2	0	3	0	0	6	60	38	111	18	0	39	0	0	0	0	GTGCCAGCAGCCGCGGTAATACGTAGGGTGCAAGCGTTAATCGGAATTATTGGGCGTAAAGCGAGTGCAGACGGTTACTTAAGCCAGATGTGAAATCCCCAAGCTTAACTTGGGACGTGCATTTGGAACTGGGTGACTAGAGTGTGTCAGAG
f__Microbacteriaceae, 2234408	k__Bacteria, p__Actinobacteria, c__Actinobacteria, o__Actinomycetales, f__Microbacteriaceae, g__, s__	2	0	0	0	0	0	0	0	0	0	0	0	0	0	0	0	0	2	0	0	0	0	0	0	0	0	0	0	0	0	0	0	0	0	0	0	0	0	0	0	0	0	0	0	0	GCAGCCGCGGTAATACGTAGGGTGCAAGCGTTGTCCGGAATTATTGGGCGTAAAGAGCTCGTAGGCGGTTTGTCGCGTCTGCTGTGAAAACGCGAGGCTCAACCTCGCGCCTGCAGTGGGTACGGGCAGACTAGAGTGCGGTAGGGG
g__Paucibacter, 818450	k__Bacteria, p__Proteobacteria, c__Betaproteobacteria, o__Burkholderiales, f__Comamonadaceae, g__Paucibacter, s__	5	0	0	0	0	0	0	0	0	0	0	0	0	0	0	0	0	0	0	0	0	0	0	0	0	0	0	0	0	0	0	0	0	0	5	0	0	0	0	0	0	0	0	0	0	GTGCCAGCAGCCGCGGTAATACGTAGGGTGCAAGCGTTAATCGGAATTACTGGGCGTAAAGCGTGCGCAGGCGGTTATGCAAGACAGATGTGAAATCCCCGGGCTCAACCTGGGAACTGCATTTGTGACTGCATGGCTAGAGTACGGCAGA
g__Blastomonas, 2251859	k__Bacteria, p__Proteobacteria, c__Alphaproteobacteria, o__Sphingomonadales, f__Sphingomonadaceae, g__Blastomonas, s__	9	0	0	0	0	0	0	0	0	0	0	0	0	0	0	0	0	0	0	0	0	0	0	6	0	0	0	0	0	0	0	0	0	0	3	0	0	0	0	0	0	0	0	0	0	GTGCCAGCAGCCGCGGTAATACGGAGGGAGCTAGCGTTGTTCGGAATTACTGGGCGTAAAGCGCACGTAGGCGGCTATTCAAGTCAGAGGTGAAAGCCCGGGGCTCAACCCCGGAACTGCCTTTGAAACTAGATAGCTTGAATCTTGGAGA
f__Comamonadaceae, 781055	k__Bacteria, p__Proteobacteria, c__Betaproteobacteria, o__Burkholderiales, f__Comamonadaceae, g__, s__	5	0	0	0	0	0	1	0	0	0	0	0	0	0	0	0	0	4	0	0	0	0	0	0	0	0	0	0	0	0	0	0	0	0	0	0	0	0	0	0	0	0	0	0	0	GCAGCCGCGGTAATACGTAGGGTGCGAGCGTTAATCGGAATTACTGGGCGTAAAGCGTGCGCAGGCGGCTTTGCAAGACAGATGTGAAATCCCCGGGCTCAACCTGGGAACTGCATTTGTGACTGCAAGGCTTGAGTGCGGCAGAGGG
f__Sphingomonadaceae, 2313705	k__Bacteria, p__Proteobacteria, c__Alphaproteobacteria, o__Sphingomonadales, f__Sphingomonadaceae, g__, s__	37861	0	0	0	0	0	0	0	0	0	0	0	0	0	1	0	0	4	0	40	271	0	1	29902	5	3	27	7	834	2	1	18	0	6	4414	1	4	19	0	2269	2	1	22	5	2	CGTGCCAGCAGCCGCGGTAATACGGAGGGAGCTAGCGTTGTTCGGAATTACTGGGCGTAAAGCGCACGTAGGCGGCTATTCAAGTCAGAGGTGAAAGCCCGGGGCTCAACCCCGGAACTGCCTTTGAAACTAGATAGCTAGAATCTTGGAGAG
g__Pedobacter, 1078582	k__Bacteria, p__Bacteroidetes, c__Sphingobacteriia, o__Sphingobacteriales, f__Sphingobacteriaceae, g__Pedobacter, s__	9	0	0	0	0	0	0	0	0	0	0	0	0	0	0	0	0	0	0	0	0	0	0	1	0	3	1	0	0	1	0	0	2	0	0	0	0	0	0	1	0	0	0	0	0	AGCAGCCGCGGTAATACGGAGGATCCAAGCGTTATCCGGATTTATTGGGTTTAAAGGGTGCGTAGGCGGCCTGTTAAGTCAGGGGTGAAAGACGGTAGCTCAACTATCGCAGTGCCCTTGATACTGATAGGCTTGAATGAACTAGAGGT
o__Actinomycetales, 665877	k__Bacteria, p__Actinobacteria, c__Actinobacteria, o__Actinomycetales, f__, g__, s__	13	0	0	0	0	0	0	0	0	0	0	0	0	0	0	0	0	0	0	0	0	0	0	2	0	3	0	0	0	0	0	0	0	0	0	0	0	0	0	0	8	0	0	0	0	GTGCCAGCAGCCGCGGTAATACGTAGGGTGCAAGCATTGTCCGGATTTATTGGGCGTAAAGAGCTCGTAGGCGGCTTGTCACGTCGGGTGTGAAAACTCGGGGCTTAACTCCGAGCCTGCACTCGATACGGGCTAGCTAGAGTGTTGCAGG
g__Devosia, 2354411	k__Bacteria, p__Proteobacteria, c__Alphaproteobacteria, o__Rhizobiales, f__Hyphomicrobiaceae, g__Devosia, s__	31	0	0	0	0	0	0	0	0	0	0	0	0	0	0	0	0	0	0	31	0	0	0	0	0	0	0	0	0	0	0	0	0	0	0	0	0	0	0	0	0	0	0	0	0	GCAGCCGCGGTAATACGAAGGGGGCTAGCGTTGTTCGGATTTACTGGGCGTAAAGCGCACGTAGGCGGAATGTTAAGTCAGAGGTGAAATCCTGGAGCTCAACTCCAGAACTGCCTTTGATACTGGCAATCTAGAGTCCGGAAGAGGT
o__Bacillales, 2374554	k__Bacteria, p__Firmicutes, c__Bacilli, o__Bacillales, f__, g__, s__	31	0	0	0	0	24	0	0	0	0	0	0	0	0	0	0	0	0	0	0	0	0	0	3	0	0	0	0	0	0	0	0	0	4	0	0	0	0	0	0	0	0	0	0	0	AGCAGCCGCGGTAATACGTAGGTGGCAAGCGTTGTCCGGAATTATTGGGCGTAAAGCGCGCGCAGGCGGTCTCTTAAGTCTGATGTGAAAGCCCACGGCTCAACCGTGGAGGGCCATTGGAAACTGGGGGACTTGAGTGCAGAAGAGG
g__Flavobacterium, 1064852	k__Bacteria, p__Bacteroidetes, c__Flavobacteriia, o__Flavobacteriales, f__Flavobacteriaceae, g__Flavobacterium, s__	7	0	0	0	0	0	7	0	0	0	0	0	0	0	0	0	0	0	0	0	0	0	0	0	0	0	0	0	0	0	0	0	0	0	0	0	0	0	0	0	0	0	0	0	0	GCAGCCGCGGTAATACGGAGGATCCAAGCGTTATCCGGAATCATTGGGTTTAAAGGGTCCGTAGGCGGTTTGGTAAGTCAGTGGTGAAAGCCCATCGCTCAACGGTGGAACGGCCATTGATACTGCCAGACTTGAATTACTAGGAAG
f__Oxalobacteraceae, 821956	k__Bacteria, p__Proteobacteria, c__Betaproteobacteria, o__Burkholderiales, f__Oxalobacteraceae, g__, s__	1177	0	0	0	0	0	1	37	0	44	75	1	1	0	32	0	123	60	0	0	0	0	0	5	1	0	21	0	282	1	3	3	5	7	64	0	0	0	0	265	1	4	2	124	15	GTGCCAGCAGCCGCGGTAATACGTAGGGTGCAAGCGTTAATCGGAATTACTGGGCGTAAAGCGTGCGCAGGCGGTTTTATAAGTCTGATGTGAAATCCCCGGGCTCAACCTGGGAACTGCATTGGAGACTGTAAGGCTAGAGTGTGTCAGAG
f__Isosphaeraceae, 1146449	k__Bacteria, p__Planctomycetes, c__Planctomycetia, o__Gemmatales, f__Isosphaeraceae, g__, s__	143	0	0	0	0	0	123	0	0	0	0	0	15	0	0	0	0	0	0	0	0	1	0	0	0	0	0	0	1	0	0	0	0	0	3	0	0	0	0	0	0	0	0	0	0	AGCAGCCGCGGTAAGACGAACCGTGCGAACGTTATTCGGAATCACTGGGCTTAAAGCGCGTGTAGGCGGGAGGGCACGTCCGTCGCTGAAATCCCACGGCTCAACCGTGGAACGGGCGCGGATACGACTCTTCTGGAGGAACGTAGGGG
g__Caulobacter, 811257	k__Bacteria, p__Proteobacteria, c__Alphaproteobacteria, o__Caulobacterales, f__Caulobacteraceae, g__Caulobacter, s__	2	0	0	0	0	0	0	0	0	0	0	0	0	0	0	0	0	0	0	0	0	0	0	0	0	0	0	0	0	0	0	0	0	0	2	0	0	0	0	0	0	0	0	0	0	GTGCCAGCAGCCGCGGTAATACGAAGGGGGCTAGCGTTGCTCGGAATTACTGGGCGTAAAGGGGAGCGTAGGCGGACTGTTAAGTTAGAGGTGAAAGCCCAGGGCTCAACCTTGGAATTGCCTTTGATACTGGCAGTCTTGAGTACGGAAGA
o__Rhizobiales, 1146393	k__Bacteria, p__Proteobacteria, c__Alphaproteobacteria, o__Rhizobiales, f__, g__, s__	2	0	0	0	0	0	2	0	0	0	0	0	0	0	0	0	0	0	0	0	0	0	0	0	0	0	0	0	0	0	0	0	0	0	0	0	0	0	0	0	0	0	0	0	0	GCAGCCGCGGTAATACGAAGGGGGCTAGCGTTGTTCGGAATTACTGGGCGTAAAGCGCACGTAGGCGGACATTTAAGTCAGGGGTGAAATCCCGGGGCTCAACCCCGGAACTGCCTTTGATACTGGGTGTCTTGAGTCCGAGAGAGG
f__Isosphaeraceae, 743801	k__Bacteria, p__Planctomycetes, c__Planctomycetia, o__Gemmatales, f__Isosphaeraceae, g__, s__	55	0	0	0	0	0	17	0	0	0	0	0	38	0	0	0	0	0	0	0	0	0	0	0	0	0	0	0	0	0	0	0	0	0	0	0	0	0	0	0	0	0	0	0	0	AGCAGCCGCGGTAAGACGAACCGTGCGAACGTTATTCGGAATCACTGGGCTTAAAGCGCGTGTAGGTGGGACGGTACGTCCGACGCTGAAATCCCCCGGCTCAACCGGGGAACGGGCGCGGATACGGCCGGCCTCGAGGAACGTAGGGG
s__acnes, 1027317	k__Bacteria, p__Actinobacteria, c__Actinobacteria, o__Actinomycetales, f__Propionibacteriaceae, g__Propionibacterium, s__acnes	2	0	0	0	0	0	0	0	0	0	0	0	0	0	0	0	0	0	0	0	0	0	0	0	2	0	0	0	0	0	0	0	0	0	0	0	0	0	0	0	0	0	0	0	0	GTGCCAGCAGCCGCGGTGATACGTACGGTGCGAGCGTTGTCCGGATTTATTGGGCGTAAAGGGCTCGTAGGTGGTTGATCGCGTCAGAAGTGTAATCTTGGGGCTTAACCCTGAGCGTGCTTTCGATACGGGTTGACTTGAGGAAGGTAG
f__Rhodocyclaceae, 2540926	k__Bacteria, p__Proteobacteria, c__Betaproteobacteria, o__Rhodocyclales, f__Rhodocyclaceae, g__, s__	2	0	0	0	0	0	0	0	0	0	0	0	0	0	0	0	0	0	0	0	0	0	0	0	0	0	0	0	0	0	0	0	0	0	1	0	0	0	0	1	0	0	0	0	0	AGCAGCCGCGGTAATACGTAGGGTGCGAGCGTTAATCGGAATTACTGGGCGTAAAGCGTGCGCAGGCGGTTTTGTAAGACAGATGTGAAATCCCCGGGCTCAACCTGGGAACTGCGTTTGTGACTGCAAGACTCGAGTACGGCAGAGG
g__Corynebacterium, 1023405	k__Bacteria, p__Actinobacteria, c__Actinobacteria, o__Actinomycetales, f__Corynebacteriaceae, g__Corynebacterium, s__	2	2	0	0	0	0	0	0	0	0	0	0	0	0	0	0	0	0	0	0	0	0	0	0	0	0	0	0	0	0	0	0	0	0	0	0	0	0	0	0	0	0	0	0	0	GCAGCCGCGGTAATACGTAGGGTGCGAGCGTTGTCCGGAATTACTGGGCGTAAAGGGCTCGTAGGTGGTTTGTCGCGTCGTCTGTGAAATTCCGGGACTTAACTCCGGGCGTGCAGGCGATACGGGCATAACTTGAGTACTGTAGGG
f__Oxalobacteraceae, 816444	k__Bacteria, p__Proteobacteria, c__Betaproteobacteria, o__Burkholderiales, f__Oxalobacteraceae, g__, s__	5	0	0	0	0	0	0	0	0	0	0	0	0	0	0	0	0	0	0	0	0	0	0	0	0	0	0	0	5	0	0	0	0	0	0	0	0	0	0	0	0	0	0	0	0	GTGCCAGCAGCCGCGGTAATACGTAGGGTGCAAGCGTTAATCGGAATTACTGGGCGTAAAGCGTGCGCAGGCGGTTTTGTAAGTCTGATGTGAAATCCCCGGGCTTAACCTGGGAACTGCATTGGAGACTGCAAGGCTAGAGTGTGTCAGA
f__Beijerinckiaceae, 926122	k__Bacteria, p__Proteobacteria, c__Alphaproteobacteria, o__Rhizobiales, f__Beijerinckiaceae, g__, s__	3	0	0	0	0	0	0	0	0	0	0	0	0	0	0	0	0	0	0	0	0	0	0	0	0	0	0	0	0	0	3	0	0	0	0	0	0	0	0	0	0	0	0	0	0	GTGCCAGCAGCCGCGGTAATACGAAGGGGGCTAGCGTTGCTCGGAATCACTGGGCGTAAAGGGCGCGTAGGCGGATCTTTAAGTCAGGGGTGAAAGCCCAAGGCTCAACCTTGGAATTGCCTTTGATACTGAGGATCTCGAGACCGGAAGA
s__schindleri, 913867	k__Bacteria, p__Proteobacteria, c__Gammaproteobacteria, o__Pseudomonadales, f__Moraxellaceae, g__Acinetobacter, s__schindleri	31	0	0	0	0	0	0	0	0	0	0	0	0	0	0	0	0	0	0	0	0	0	0	0	0	4	6	0	0	0	0	0	0	2	0	14	0	0	0	0	5	0	0	0	0	GTGCCAGCAGCCGCGGTAATACAGAGGGTGCGAGCGTTAATCGGATTTACTGGGCGTAAAGCGTGCGTAGGCGGCTTTTTAAGTCGGATGTGAAATCCCTGAGCTTAACTTAGGAATTGCATTCGATACTGGAGAGCTAGAGTATGGGAGAG
f__Cytophagaceae, 1118729	k__Bacteria, p__Bacteroidetes, c__Cytophagia, o__Cytophagales, f__Cytophagaceae, g__, s__	4	0	0	0	0	0	0	0	0	0	0	0	0	0	0	0	0	0	0	0	0	0	0	4	0	0	0	0	0	0	0	0	0	0	0	0	0	0	0	0	0	0	0	0	0	GTGCCAGCAGCCGCGGTAATACGTAGGTGGCAAGCGTTGTCCGGATTTATTGGGTTTAAAGGGTGCGTAGGCGGCCGCCTAAGTCAGTTGTGAAATACCCCGGCTCAACCGGGGGGGTGCGATTGATACTGGGCGGCTCGAGTAACAGCGA
f__Bradyrhizobiaceae, 653104	k__Bacteria, p__Proteobacteria, c__Alphaproteobacteria, o__Rhizobiales, f__Bradyrhizobiaceae, g__, s__	147	0	0	0	0	0	0	0	0	0	0	0	0	0	0	0	0	49	0	0	0	0	98	0	0	0	0	0	0	0	0	0	0	0	0	0	0	0	0	0	0	0	0	0	0	AGCAGCCGCGGTAATACGAAGGGGGCTAGCGTTGCTCGGAATCACTGGGCGTAAAGGGTGCGTAGGCGGGTCTTTAAGTCAGAGGTGAAAGCCTGGAGCTCAACTCCAGAACTGCCTTTGATACTGAGGATCTTGAGTTCGGGAGAGGT
s__multivorum, 1141727	k__Bacteria, p__Bacteroidetes, c__Sphingobacteriia, o__Sphingobacteriales, f__Sphingobacteriaceae, g__Sphingobacterium, s__multivorum	13	0	0	0	0	0	0	0	0	0	0	0	0	0	0	0	0	0	0	0	0	0	0	0	0	0	13	0	0	0	0	0	0	0	0	0	0	0	0	0	0	0	0	0	0	GTGCCAGCAGCCGCGGTAATACGGAGGATCCGAGCGTTATCCGGATTTATTGGGTTTAAAGGGTGCGTAGGCGGCCTGTTAAGTCAGGGGTGAAATACGGTGGCTCAACCATCGCAGTGCCTTTGATACTGATGGGCTTGAATCCATTTGA
f__Enterobacteriaceae, 2749126	k__Bacteria, p__Proteobacteria, c__Gammaproteobacteria, o__Enterobacteriales, f__Enterobacteriaceae, g__, s__	2	1	0	0	0	0	0	0	0	0	0	0	0	1	0	0	0	0	0	0	0	0	0	0	0	0	0	0	0	0	0	0	0	0	0	0	0	0	0	0	0	0	0	0	0	GCAGCCGCGGTAATACGGAGGGTGCAAGCGTTAATCGGAATTACTGGGCGTAAAGCGCACGCAGGCGGTTTGTTTAGTCAGATGTGAAATCCCCGGGCTCAACCTGGGAACTGCATCTGATACTGGCAAGCTTGAGTCTCGTAGAGG
f__Nakamurellaceae, 972343	k__Bacteria, p__Actinobacteria, c__Actinobacteria, o__Actinomycetales, f__Nakamurellaceae, g__, s__	21	0	0	0	0	0	8	0	0	0	0	0	1	0	0	0	0	0	0	0	0	0	0	4	0	3	0	0	0	0	0	0	0	0	0	0	0	0	0	5	0	0	0	0	0	GTGCCAGCAGCCGCGGTAATACGTAGGGTGCGAGCGTTGTCCGGAATTATTGGGCGTAAAGAGCTCGTAGGCGGTCTGTCGCGTCGAATGTGAAAACCCGGGGCTCAACTCCGGGCTTGCATTCGATACGGGCAGGCTAGAGTTCGGTAGGGG
f__Aeromonadaceae, 2769196	k__Bacteria, p__Proteobacteria, c__Gammaproteobacteria, o__Aeromonadales, f__Aeromonadaceae, g__, s__	8	0	0	0	0	0	0	0	0	0	0	0	0	0	0	0	0	0	0	0	0	0	0	1	1	0	0	1	2	1	0	1	0	0	0	0	1	0	0	0	0	0	0	0	0	GTGCCAGCAGCCGCGGTAATACGGAGGGTGCAAGCGTTAATCGGAATTACTGGGCGTAAAGCGCACGCAGGCGGTTGGATAAGTTAGATGTGAAAGCCCCGGGCTCAACCTGGGAATTGCATTTAAAACTGTCCAGCTAGAGTCTTGTAGTGG
f__Comamonadaceae, 2801319	k__Bacteria, p__Proteobacteria, c__Betaproteobacteria, o__Burkholderiales, f__Comamonadaceae, g__, s__	22	0	0	0	0	0	1	0	0	0	0	0	0	0	0	0	0	21	0	0	0	0	0	0	0	0	0	0	0	0	0	0	0	0	0	0	0	0	0	0	0	0	0	0	0	AGCAGCCGCGGTAATACGTAGGGTGCGAGCGTTAATCGGAATTACTGGGCGTAAAGCGTGCGCAGGCGGTTATGTAAGACAGATGTGAAATCCCCGGGCTCAACCTGGGAACTGCATTTGTGACTGCATGACTGGAGTGCGGCAGAGG
g__Lysobacter, 1143681	k__Bacteria, p__Proteobacteria, c__Gammaproteobacteria, o__Xanthomonadales, f__Xanthomonadaceae, g__Lysobacter, s__	8	0	0	0	0	0	0	0	0	0	0	0	0	0	0	0	0	0	0	0	0	0	0	0	0	0	0	7	0	0	0	0	0	1	0	0	0	0	0	0	0	0	0	0	0	GTGCCAGCAGCCGCGGTAATACGAAGGGTGCAAGCGTTACTCGGAATTACTGGGCGTAAAGCGTGCGTAGGTGGTTTGTTAAGTCAGATGTGAAAGCCCTGGGCTCAACCTGGGAACTGCATTTGATACTGGCAGGCTAGAGTGCGGTAGA
g__Fusobacterium, 2825358	k__Bacteria, p__Fusobacteria, c__Fusobacteriia, o__Fusobacteriales, f__Fusobacteriaceae, g__Fusobacterium, s__	15	0	0	0	0	0	0	0	0	0	0	0	0	0	0	0	0	0	0	0	0	0	0	0	0	0	0	5	0	0	0	0	0	0	0	0	0	0	0	0	10	0	0	0	0	GTGCCAGCAGCCGCGGTAATACGTATGTCACAAGCGTTATCCGGATTTATTGGGCGTAAAGCGCGTCTAGGTGGTTATGTAAGTCTGATGTGAAAATGCAGGGCTCAACTCTGTATTGCGTTGGAAACTGTGTAACTAGAGTACTGGAGAG
s__wittichii, 1009973	k__Bacteria, p__Proteobacteria, c__Alphaproteobacteria, o__Sphingomonadales, f__Sphingomonadaceae, g__Sphingomonas, s__wittichii	26	0	0	0	0	0	0	26	0	0	0	0	0	0	0	0	0	0	0	0	0	0	0	0	0	0	0	0	0	0	0	0	0	0	0	0	0	0	0	0	0	0	0	0	0	GCAGCCGCGGTAATACGGAGGGGGCTAGCGTTGTTCGGAATTACTGGGCGTAAAGCGCACGTAGGCGGCTTTGTAAGTTAGAGGTGAAAGCCCGGGGCTCAACTCCGGAACTGCCTTTAAGACTGCATCGCTTGAATCATGGAGAGGT
f__Comamonadaceae, 2881877	k__Bacteria, p__Proteobacteria, c__Betaproteobacteria, o__Burkholderiales, f__Comamonadaceae, g__, s__	6	0	0	0	0	0	6	0	0	0	0	0	0	0	0	0	0	0	0	0	0	0	0	0	0	0	0	0	0	0	0	0	0	0	0	0	0	0	0	0	0	0	0	0	0	GCAGCCGCGGTAATACGTAGGGTGCGAGCGTTAATCGGAATTACTGGGCGTAAAGCGTGCGCAGGCGGCTTTGCAAGACAGATGTGAAATCCCCGGGCTTAACCTGGGAACTGCATTTGTGACTGCAAGGCTAGAGTACGGTAGAGG
g__Agrobacterium, 616402	k__Bacteria, p__Proteobacteria, c__Alphaproteobacteria, o__Rhizobiales, f__Rhizobiaceae, g__Agrobacterium, s__	544	0	0	0	0	0	166	0	13	0	13	0	8	0	0	0	0	0	0	0	0	0	0	30	0	0	53	4	7	15	11	25	24	11	120	16	0	1	14	7	0	0	0	0	6	GTGCCAGCAGCCGCGGTAATACGAAGGGGGCTAGCGTTGTTCGGAATTACTGGGCGTAAAGCGCACGTAGGCGGACTTTTAAGTCAGGGGTGAAATCCCGGGGCTCAACCTCGGAACTGCCTTTGATACTGGAAGTCTTGAGTATGGAAGAG
f__mitochondria, 2938850	k__Bacteria, p__Proteobacteria, c__Alphaproteobacteria, o__Rickettsiales, f__mitochondria, g__, s__	8	0	0	0	0	0	0	0	0	0	0	0	0	0	0	0	0	0	0	0	0	0	0	0	0	0	0	0	0	0	0	0	0	0	0	0	8	0	0	0	0	0	0	0	0	GTGCCAGCAGCCGCGGTAAAACGGGAGGAGCAAGTATTATTCTAATTGACTGGGCGTAAAGGGTGCGTAGGTGGTAAACTAAGTAGTAAAAAAATTTTAAATTTCATGTTTACTAAAGATTACTAAACTAATTTACTAGAGCATAGGAAAA
g__Rubrivivax, 1143021	k__Bacteria, p__Proteobacteria, c__Betaproteobacteria, o__Burkholderiales, f__Comamonadaceae, g__Rubrivivax, s__	33	0	0	0	0	0	31	0	0	0	0	0	0	0	0	0	0	0	0	0	0	0	0	2	0	0	0	0	0	0	0	0	0	0	0	0	0	0	0	0	0	0	0	0	0	AGCAGCCGCGGTAATACGTAGGGTGCGAGCGTTAATCGGAATTACTGGGCGTAAAGCGTGCGCAGGCGGTTATGCAAGACAGGTGTGAAATCCCCGGGCTCAACCTGGGAACTGCACTTGTGACTGCATAGCTGGAGTACGGCAGAGG
g__Agrobacterium, 2954730	k__Bacteria, p__Proteobacteria, c__Alphaproteobacteria, o__Rhizobiales, f__Rhizobiaceae, g__Agrobacterium, s__	7	0	0	0	0	0	0	0	0	0	0	0	0	0	0	0	0	3	0	0	0	0	0	2	0	0	0	0	0	0	0	0	0	0	0	0	0	0	0	2	0	0	0	0	0	GTGCCAGCAGCCGCGGTAATACGAAGGGGGCTAGCGTTGTTCGGAATTACTGGGCGTAAAGCGCACGTAGGCGGATATTTAAGTCAGGGGTGAAATCCCGGAGCTCAACTCCGGAACTGCCTTTGATACTGGGTATCTTGAGTATGGAAGAG
c__Betaproteobacteria, 2996648	k__Bacteria, p__Proteobacteria, c__Betaproteobacteria, o__, f__, g__, s__	61	0	0	0	0	0	61	0	0	0	0	0	0	0	0	0	0	0	0	0	0	0	0	0	0	0	0	0	0	0	0	0	0	0	0	0	0	0	0	0	0	0	0	0	0	GCAGCCGCGGTAATACGTAGGGTGCGAGCGTTAATCGGAATTACTGGGCGTAAAGCGTGCGCAGGCGGTTTTGTAAGACAGATGTGAAATCCCCGGGCTCAACCTGGGAACTGCATTTGTGACTGCAAGGCTAGAGTGCGGCAGAGG
g__Hydrogenophaga, 3025389	k__Bacteria, p__Proteobacteria, c__Betaproteobacteria, o__Burkholderiales, f__Comamonadaceae, g__Hydrogenophaga, s__	2	0	0	0	0	0	0	0	0	0	0	0	2	0	0	0	0	0	0	0	0	0	0	0	0	0	0	0	0	0	0	0	0	0	0	0	0	0	0	0	0	0	0	0	0	GCAGCCGCGGTAATACGTAGGGTGCGAGCGTTAATCGGAATTACTGGGCGTAAAGCGTGCGCAGGCGGTGCTGTAAGACAGGCGTGAAATCCCCGGGCTTAACCTGGGAATGGCGCTTGTGACTGCAGTGCTGGAGTGCGGCAGAGG
s__acnes, 911016	k__Bacteria, p__Actinobacteria, c__Actinobacteria, o__Actinomycetales, f__Propionibacteriaceae, g__Propionibacterium, s__acnes	82	0	0	3	1	0	0	0	0	1	1	2	0	0	0	0	0	0	0	2	0	0	1	0	5	4	4	15	0	3	1	4	0	2	0	8	7	10	5	0	2	0	0	0	1	GGCAGCCGCGGTGATACGTAGGGTGCGAGCGTTGTCCGGATTTATTGGGCGTAAAGGGCTCGTAGGTGGTTGATCGCGTCGGAAGTGTAATCTTGGGGCTTAACCCTGAGCGTGCTTTCGATACGGGTTGACTTGAGGAAGGTAGGGGA
g__Mycobacterium, 688993	k__Bacteria, p__Actinobacteria, c__Actinobacteria, o__Actinomycetales, f__Mycobacteriaceae, g__Mycobacterium, s__	4	0	0	0	0	0	0	0	0	0	0	0	0	0	0	0	0	2	0	0	0	0	0	0	0	0	0	0	0	0	0	0	0	2	0	0	0	0	0	0	0	0	0	0	0	GTGCCAGCAGCCGCGGTAATACGTAGGGTCCGAGCGTTGTCCGGAATTACTGGGCGTAAAGAGCTCGTAGGTGGTTTGTCGCGTTGTTCGTGAAAACTCACAGCTTAACTGTGGGCGTGCGGGCGATACGGGCAGACTGGAGTACTGCAGGGG
g__Emticicia, 1126475	k__Bacteria, p__Bacteroidetes, c__Cytophagia, o__Cytophagales, f__Cytophagaceae, g__Emticicia, s__	1890	0	0	0	0	0	0	0	0	0	0	0	0	0	1	0	0	0	0	0	0	0	0	269	90	108	200	75	4	172	31	293	247	72	4	56	16	105	43	35	14	7	5	1	42	CGTGCCAGCAGCCGCGGTAATACGTAGGTGGCGAGCGTTATCCGGATTTATTGGGTTTAAAGGGTGCGTAGGCGGCTGATTAAGTCAGCGGTGAAAGGTAGCAGCTTAACTGTTTTACATGCCGTTGATACTGGTTAGCTTGAGTTGACAGAA
f__Rhodospirillaceae, 831407	k__Bacteria, p__Proteobacteria, c__Alphaproteobacteria, o__Rhodospirillales, f__Rhodospirillaceae, g__, s__	18	0	0	0	0	0	0	0	0	0	0	0	14	0	0	0	0	0	0	1	0	0	0	0	0	0	0	0	0	0	0	0	0	0	2	0	0	0	0	1	0	0	0	0	0	AGCAGCCGCGGTAAGACGAAGGGGGCTAGCGTTGTTCGGAATTACTGGGCGTAAAGCGAGTGTAGGTGGTTTTCCAAGTTGGATGTGAAAGCCTTGAGCTCAACTCAAGAAATGCATTCAGGACTGGGAGACTAGAGGACCGGAGAGG
f__Comamonadaceae, 766306	k__Bacteria, p__Proteobacteria, c__Betaproteobacteria, o__Burkholderiales, f__Comamonadaceae, g__, s__	15	0	0	0	0	0	8	0	0	0	0	0	0	0	0	0	0	7	0	0	0	0	0	0	0	0	0	0	0	0	0	0	0	0	0	0	0	0	0	0	0	0	0	0	0	GCAGCCGCGGTAATACGTAGGGTGCAAGCGTTAATCGGAATTACTGGGCGTAAAGCGTGCGCAGGCGGTTGTGCAAGACAGGTGTGAAATCCCCGGGCTTAACCTGGGAACTGCACTTGTGACTGCACGGCTTGAGTGCGGCAGAGG
s__paradoxus, 644798	k__Bacteria, p__Proteobacteria, c__Betaproteobacteria, o__Burkholderiales, f__Comamonadaceae, g__Variovorax, s__paradoxus	39	0	0	0	0	0	0	0	0	0	0	0	0	0	0	0	0	0	0	0	0	0	0	0	0	0	0	0	24	0	0	0	0	0	13	2	0	0	0	0	0	0	0	0	0	GTGCCAGCAGCCGCGGTAATACGTAGGGTGCGAGCGTTAATCGGAATTACTGGGCGTAAAGCGTGCGCAGGCGGTGATGTAAGACAGTTGTGAAATCCCCGGGCTCAACCTGGGAACTGCATCTGTGACTGCATCGCTGGAGTACGGCAGAG
f__Comamonadaceae, 3167757	k__Bacteria, p__Proteobacteria, c__Betaproteobacteria, o__Burkholderiales, f__Comamonadaceae, g__, s__	8	0	0	0	0	0	1	0	0	0	0	0	0	0	0	0	0	7	0	0	0	0	0	0	0	0	0	0	0	0	0	0	0	0	0	0	0	0	0	0	0	0	0	0	0	GCAGCCGCGGTAATACGTAGGGTGCAAGCGTTAATCGGAATTACTGGGCGTAAAGCGTGCGCAGGCGGTGATGTAAGACAGATGTGAAATCCCCGGGCTCAACCTGGGAACTGCATTTGTGACTGCATCGCTGGAGTACGGCAGAGG
s__acnes, 925397	k__Bacteria, p__Actinobacteria, c__Actinobacteria, o__Actinomycetales, f__Propionibacteriaceae, g__Propionibacterium, s__acnes	2	0	0	0	0	0	0	0	0	0	0	0	0	0	0	0	0	0	0	0	0	0	0	0	0	0	1	0	0	1	0	0	0	0	0	0	0	0	0	0	0	0	0	0	0	GTGCCAGCAGCCGCGGTGATACGTAGGGTGCGAGCGTTGTCCGGATTTATTGGGCGTAAAGGGCTCGTAGGTGGTTGATCGCGTCGGAAGTGAAATCTTGGGGCTTAACCCTGAGCGTGCTTTCGATACGGGTTGACTTGAGGAAGGTAGG
g__Methyloversatilis, 1116888	k__Bacteria, p__Proteobacteria, c__Betaproteobacteria, o__Rhodocyclales, f__Rhodocyclaceae, g__Methyloversatilis, s__	2517	0	2	0	1	0	1727	2	0	0	0	0	41	0	1	0	0	565	0	1	0	2	0	149	0	0	0	0	6	0	0	0	0	0	3	0	0	2	0	15	0	0	0	0	0	AGCAGCCGCGGTAATACGTAGGGTGCGAGCGTTAATCGGAATTACTGGGCGTAAAGCGTGCGCAGGCGGTTGTGTAAGACAGGTGTGAAATCCCCGGGCTTAACCTGGGAACTGCGCTTGTGACTGCACGGCTAGAGTATGGCAGAGGG
f__Isosphaeraceae, 685193	k__Bacteria, p__Planctomycetes, c__Planctomycetia, o__Gemmatales, f__Isosphaeraceae, g__, s__	62	0	0	0	1	0	0	0	0	0	0	0	61	0	0	0	0	0	0	0	0	0	0	0	0	0	0	0	0	0	0	0	0	0	0	0	0	0	0	0	0	0	0	0	0	AGCAGCCGCGGTAAGACGAACCAAGCGAACGTTATTCGGAATTACTGGGCTTAAAGCGCGTGTAGGCGGATGACCACGTCAGTCGTTGAAATCCCCCGGCTCAACCGGGGAACAGGCGCTGATACGAGTTATCTGGAGGTGGGTAGGG
f__Haliangiaceae, 1135669	k__Bacteria, p__Proteobacteria, c__Deltaproteobacteria, o__Myxococcales, f__Haliangiaceae, g__, s__	2	0	0	0	0	0	0	0	0	0	0	0	0	0	0	0	0	0	0	0	0	0	0	0	0	0	0	0	0	0	0	0	0	0	0	0	0	0	2	0	0	0	0	0	0	GTGCCAGCAGCCGCGGTAATACGAAGGGTGCAAACGTTGCTCGGAATTATTGGGCGTAAAGCGCACGTAGGCGGCTTTGTAAGTCGGATGTGAAATCCCTCGGCTTAACCAAGGAAGTGCATCCGAAACTACAGAGCTTGAGTACTTAAGA
s__halophobica, 1115352	k__Bacteria, p__Actinobacteria, c__Actinobacteria, o__Actinomycetales, f__Pseudonocardiaceae, g__Pseudonocardia, s__halophobica	2	0	0	0	0	0	0	0	0	0	0	0	0	0	0	0	0	0	0	0	0	0	0	0	0	0	0	0	0	0	0	0	0	0	0	0	0	0	2	0	0	0	0	0	0	GTGCCAGCAGCCGCGGTAACACGTAGGGTGCGAGCGTTGTCCGGAATTATTGGGCGTAAAGAGCTCGTAGGCGGTCTGTCGCGTCGGTCGTGAAAACTTGGGGCTTAACCCTGAGCTTGCGGTCGATACGGGCATGACTGGAGTTCGGCAG
f__Rhodospirillaceae, 3412843	k__Bacteria, p__Proteobacteria, c__Alphaproteobacteria, o__Rhodospirillales, f__Rhodospirillaceae, g__, s__	2	0	0	0	0	0	0	0	0	0	0	0	0	0	0	0	0	2	0	0	0	0	0	0	0	0	0	0	0	0	0	0	0	0	0	0	0	0	0	0	0	0	0	0	0	GCAGCCGCGGTAAGACGAAGGGGGCTAGCGTTGTTCGGAATTACTGGGCGTAAAGCGAGTGTAGGTGGTTGTCATAGTCAGGCGTGAAAGCCTTGAGCTCAACTCAAGAAATGCGCTTGATACTGGGCGGCTAGAGGACCGGAGAGG
f__Comamonadaceae, 1144006	k__Bacteria, p__Proteobacteria, c__Betaproteobacteria, o__Burkholderiales, f__Comamonadaceae, g__, s__	2	0	0	0	0	0	2	0	0	0	0	0	0	0	0	0	0	0	0	0	0	0	0	0	0	0	0	0	0	0	0	0	0	0	0	0	0	0	0	0	0	0	0	0	0	GCAGCCGCGGTAATACGTAGGGTGCGAGCGTTAATCGGAATTACTGGGCGTAAAGCGTGCGCAGGCGGTGATGTAAGACAGAGGTGAAATCCCCGGGCTCAACCTGGGAACTGCCTTTGTGACTGCATCGCTGGAGTGCGGCAGAGG
g__Luteolibacter, 634209	k__Bacteria, p__Verrucomicrobia, c__Verrucomicrobiae, o__Verrucomicrobiales, f__Verrucomicrobiaceae, g__Luteolibacter, s__	3	0	0	0	0	0	2	0	0	0	0	0	0	0	0	0	0	1	0	0	0	0	0	0	0	0	0	0	0	0	0	0	0	0	0	0	0	0	0	0	0	0	0	0	0	GCAGCCGCGGTAATACGAAGGTCCCAAGCGTTGTTCGGAATCACTGGGCGTAAAGGGTGCGTAGGCGGTTTGGTAAGTCAGATGTGAAATCCCGGGGCTCAACCCCGGAACTGCATCCGATACTGCCAGACTTGAGGACTGGAGAGG
f__Enterobacteriaceae, 828524	k__Bacteria, p__Proteobacteria, c__Gammaproteobacteria, o__Enterobacteriales, f__Enterobacteriaceae, g__, s__	5	0	0	0	0	0	0	0	0	0	0	0	0	0	0	0	0	0	0	0	0	0	0	0	0	0	0	0	0	0	0	0	0	0	0	0	0	0	0	0	0	0	5	0	0	GTGCCAGCAGCCGCGGTAATACGGAGGGTGCAAGCGTTAATCGGAATTACTGGGCGTAAAGCGCACGCAGGCGGTTTGTTAAGTCAGATGTGAAATCCCCGAGCTTAACTTGGGAACTGCATTTGAAACTGGCAGACTAGAGTCTCGTAGAG
f__Sphingomonadaceae, 1146228	k__Bacteria, p__Proteobacteria, c__Alphaproteobacteria, o__Sphingomonadales, f__Sphingomonadaceae, g__, s__	7	0	0	0	0	0	0	0	0	0	0	0	0	0	0	0	0	0	0	0	0	0	0	4	0	0	0	0	0	0	0	0	0	0	2	0	0	0	0	1	0	0	0	0	0	GTGCCAGCAGCCGCGGTAATACGGAGGGAGCTAGCGTTGTTCGGAATTACTGGGCGTAAAGCGCACGTAGGCGGCTATTCAAGTCAGAGGTGAAAGCCCGGGGCTCAACCCCGGAATAGCCTTTGAAACTAGATAGCTAGAATCTGGGAGA
g__Methylobacterium, 677165	k__Bacteria, p__Proteobacteria, c__Alphaproteobacteria, o__Rhizobiales, f__Methylobacteriaceae, g__Methylobacterium, s__	6222	1032	398	297	527	296	8	335	85	128	89	320	1	347	241	164	502	9	244	300	362	281	230	2	16	5	2	0	0	0	0	0	0	0	1	0	0	0	0	0	0	0	0	0	0	AGCAGCCGCGGTAATACGAAGGGGGCTAGCGTTGCTCGGAATCACTGGGCGTAAAGGGCGCGTAGGCGGCCTTGTAAGTTGGGGGTGAAAGCCCGTGGCTCAACCACGGAATTGCCTTCGATACTGCTTGGCTTGAGTGTGGTAGAGGT
g__Modestobacter, 1110021	k__Bacteria, p__Actinobacteria, c__Actinobacteria, o__Actinomycetales, f__Geodermatophilaceae, g__Modestobacter, s__	3	0	0	0	0	0	0	0	0	0	0	0	0	0	0	0	0	0	0	0	0	0	0	0	0	0	0	0	0	0	0	0	0	3	0	0	0	0	0	0	0	0	0	0	0	GTGCCAGCAGCCGCGGTAATACGTAGGGTGCAAGCGTTGTCCGGAATTATTGGGCGTAAAGAGCTCGTAGGCGGTCTGTCGCGTCGGCTGTGAAAACCCGAGGCTCAACCTCGGGCCTGCAGTCGATACGGGCAAACTAGAGTACTGCAGG
f__Enterobacteriaceae, 3531225	k__Bacteria, p__Proteobacteria, c__Gammaproteobacteria, o__Enterobacteriales, f__Enterobacteriaceae, g__, s__	4	2	0	1	0	0	0	0	0	0	0	0	0	0	0	0	0	0	0	0	1	0	0	0	0	0	0	0	0	0	0	0	0	0	0	0	0	0	0	0	0	0	0	0	0	GTGCCAGCAGCCGCGGTAATACGGAGGGTGCAAGCGTTAATCGGAATTACTGGGCGTAAAGCGCACGCAGGCGGTTTGTTAAGTCAGATGTGAAACCCCCGGGCTCAACCTGGGAACTGCATCTGATACTGGCAAGCTTGAGTCTCGTAGAG
f__Comamonadaceae, 1119551	k__Bacteria, p__Proteobacteria, c__Betaproteobacteria, o__Burkholderiales, f__Comamonadaceae, g__, s__	5	0	0	0	0	0	3	0	0	0	0	0	0	0	0	0	0	0	0	0	0	0	0	0	0	0	0	0	1	0	0	0	0	0	1	0	0	0	0	0	0	0	0	0	0	GTGCCAGCAGCCGCGGTAATACGTAGGGTGCAAGCGTTAATCGGAATTACTGGGCGTAAAGCGTGCGCAGGCGGGTATGTAAGACAGAGGTGAAATCCCCGGGCTCAACCTGGGAACTGCCTTTGTGACTGCATAGCTAGAGTACGGTAGAGG
f__Comamonadaceae, 856343	k__Bacteria, p__Proteobacteria, c__Betaproteobacteria, o__Burkholderiales, f__Comamonadaceae, g__, s__	6	0	0	0	0	0	0	0	0	0	0	0	0	0	0	0	0	6	0	0	0	0	0	0	0	0	0	0	0	0	0	0	0	0	0	0	0	0	0	0	0	0	0	0	0	AGCAGCCGCGGTAATACGTAGGGTGCAAGCGTTAATCGGAATTACTGGGCGTAAAGCGTGCGCAGGCGGTTATGTAAGACAGATGTGAAATCCCCGGGCTCAACCTGGGAACTGCATTAGTGACTGCATAGCTGGAGTGCGGCAGAGGG
f__Sphingomonadaceae, 1129599	k__Bacteria, p__Proteobacteria, c__Alphaproteobacteria, o__Sphingomonadales, f__Sphingomonadaceae, g__, s__	617	0	0	1	0	0	176	0	0	0	0	0	15	0	0	0	0	396	0	0	0	1	0	20	0	0	0	1	2	0	0	0	0	0	3	0	0	0	0	2	0	0	0	0	0	AGCAGCCGCGGTAATACGGAGGGAGCTAGCGTTGTTCGGAATTACTGGGCGTAAAGCGCACGTAGGCGGCTACTCAAGTCAGAGGTGAAAGCCCGGGGCTCAACCCCGGAACTGCCTTTGAAACTAGGTGGCTAGAATCTTGGAGAGGC
s__caeni, 1013213	k__Bacteria, p__Proteobacteria, c__Betaproteobacteria, o__Burkholderiales, f__Comamonadaceae, g__Acidovorax, s__caeni	2	0	0	0	0	0	2	0	0	0	0	0	0	0	0	0	0	0	0	0	0	0	0	0	0	0	0	0	0	0	0	0	0	0	0	0	0	0	0	0	0	0	0	0	0	GCAGCCGCGGTAATACGTAGGGTGCGAGCGTTAATCGGAATTACTGGGCGTAAAGCGTGCGCAGGCGGTGATGTAAGACAGAGGTGAAATCCCCGGGCTCAACCTGGGAACTGCCTTTGTGACTGCATCGCTGGAGTACGGCAGAGG
f__Comamonadaceae, 751207	k__Bacteria, p__Proteobacteria, c__Betaproteobacteria, o__Burkholderiales, f__Comamonadaceae, g__, s__	3859	0	0	61	0	0	211	1	29	276	25	49	47	0	1	0	50	517	0	13	1	0	0	479	0	4	25	28	208	2	0	19	8	4	1325	0	0	24	0	351	9	11	13	61	7	CGTGCCAGCAGCCGCGGTAATACGTAGGGTGCAAGCGTTAATCGGAATTACTGGGCGTAAAGCGTGCGCAGGCGGTTATGCAAGACAGAGGTGAAATCCCCGGGCTCAACCTGGGAACTGCCTTTGTGACTGCATAGCTAGAGTACGGTAGAG
s__genosp., 622987	k__Bacteria, p__Proteobacteria, c__Alphaproteobacteria, o__Rhizobiales, f__Bradyrhizobiaceae, g__Bosea, s__genosp.	24	0	0	0	0	0	0	0	1	0	0	0	0	0	0	0	0	19	0	0	0	0	0	0	0	0	2	0	0	0	0	0	0	0	2	0	0	0	0	0	0	0	0	0	0	AGCAGCCGCGGTAATACGAAAGGGGGCTAGCGTTGCTCGGAATCACTGGGCGTAAAGGGTGCGTAGGCGGGTTTCTAAGTCAGAGGTGAAAGCCTGGAGCTCAACTCCAGAACTGCCTTTGATACTGGAAGTCTTGAGTTCGGGAGAGGT
g__Burkholderia, 834463	k__Bacteria, p__Proteobacteria, c__Betaproteobacteria, o__Burkholderiales, f__Burkholderiaceae, g__Burkholderia, s__	4	0	0	0	0	0	0	1	0	0	0	0	0	0	0	0	0	0	0	0	0	0	3	0	0	0	0	0	0	0	0	0	0	0	0	0	0	0	0	0	0	0	0	0	0	GCAGCCGCGGTAATACGTAGGGTGCGAGCGTTAATCGGAATTACTGGGCGTAAAGCGTGCGCAGGCGGTTTGCTAAGACCGATGTGAAATCCCCGGGCTCAACCTGGGAACTGCATTGGTGACTGGCAGGCTAGAGTATGGCAAAGG
f__Oxalobacteraceae, 831328	k__Bacteria, p__Proteobacteria, c__Betaproteobacteria, o__Burkholderiales, f__Oxalobacteraceae, g__, s__	11	0	0	0	0	0	0	0	0	0	0	0	0	0	0	0	0	0	0	0	0	0	0	0	0	0	10	0	0	0	0	0	0	0	0	0	0	0	1	0	0	0	0	0	0	GTGCCAGCAGCCGCGGTAATACGTAGGGTGCAAGCGTTAATCGGAATTACTGGGCGTAAAGCGTGCGCAGGCGGTTGTGCAAGACCGATGTGAAATCCCCGGGCTTAACCTGGGAATGGCATTGGTGACTGCACGGCTAGAGTGTGTCAGA
f__Acetobacteraceae, 772368	k__Bacteria, p__Proteobacteria, c__Alphaproteobacteria, o__Rhodospirillales, f__Acetobacteraceae, g__, s__	3	0	0	0	0	0	0	0	0	0	0	0	3	0	0	0	0	0	0	0	0	0	0	0	0	0	0	0	0	0	0	0	0	0	0	0	0	0	0	0	0	0	0	0	0	GCAGCCGCGGTAATACGAAGGGGGCTAGCGTTGCTCGGAATTACTGGGCGTAAAGGGCGCGTAGGCGGCTTGGCCAGTCAGGCGTGAAATTCCTGGGCTTAACCTGGGGACTGCGCTTGATACTGCCAGGCTTGAGGCCGAGAGAGG
f__Enterobacteriaceae, 3799784	k__Bacteria, p__Proteobacteria, c__Gammaproteobacteria, o__Enterobacteriales, f__Enterobacteriaceae, g__, s__	8	1	4	0	0	0	0	0	0	1	0	0	0	0	1	0	0	0	1	0	0	0	0	0	0	0	0	0	0	0	0	0	0	0	0	0	0	0	0	0	0	0	0	0	0	GCAGCCGCGGTTAATACGGAGGGTGCAAGCGTTAATCGGAATTACTGGGCGTAAAGCGCACGCAGGCGGTTTGTTAAGTCAGATGTGAAATCCCCGGGCTCAACCTGGGAACTGCATCTGATACTGGCAAGCTTGAGTCTCGTAGAGGG
g__Chromobacterium, 1137914	k__Bacteria, p__Proteobacteria, c__Betaproteobacteria, o__Neisseriales, f__Neisseriaceae, g__Chromobacterium, s__	79	0	0	0	0	0	0	0	0	0	0	0	0	0	0	0	0	0	0	0	0	0	0	2	0	0	0	0	35	0	1	0	0	0	2	0	0	0	0	28	9	1	0	1	0	GTGCCAGCAGCCGCGGTAATACGTAGGGTGCAAGCGTTAATCGGAATTACTGGGCGTAAAGCGTGCGCAGGCGGTTGTGCAAGTCTGATGTGAAAGCCCCGGGCTCAACCTGGGAACGGCATTGGAGACTGCACGACTAGAGTGCGTCAGA
g__Vogesella, 3847840	k__Bacteria, p__Proteobacteria, c__Betaproteobacteria, o__Neisseriales, f__Neisseriaceae, g__Vogesella, s__	146	0	0	37	50	0	0	0	0	0	0	0	0	0	0	0	0	0	0	0	0	0	0	0	6	0	18	7	0	0	0	2	2	2	0	0	0	0	0	12	0	0	0	9	1	AGCAGCCGCGGTAATACGTAGGGTGCGAGCGTTAATCGGAATTACTGGGCGTAAAGCGTGCGCAGGCGGTTTGATAAGCCAGATGTGAAATCCCCGAGCTCAACTTGGGAACTGCGTTTGGAACTGTCAGACTAGAGTGCGTCAGAGGG
g__Peptoniphilus, 654307	k__Bacteria, p__Firmicutes, c__Clostridia, o__Clostridiales, f__[Tissierellaceae], g__Peptoniphilus, s__	57	0	0	0	0	0	0	0	0	0	0	0	0	0	0	0	0	0	0	0	0	57	0	0	0	0	0	0	0	0	0	0	0	0	0	0	0	0	0	0	0	0	0	0	0	AGCAGCCGCGGTAATACGTAGGGGGCGAGCGTTGTCCGGAATTACTGGGCGTAAAGGGTTCGCAGGCGGCATGACAAGTCCGATGTAAAAGGCGAAAGCTCAACTTTCGTAAGCATCGGAAACTGTCAAGCTTGAGTGAAGGAGAGGC
g__Flavobacterium, 682736	k__Bacteria, p__Bacteroidetes, c__Flavobacteriia, o__Flavobacteriales, f__Flavobacteriaceae, g__Flavobacterium, s__	59	0	0	0	0	0	59	0	0	0	0	0	0	0	0	0	0	0	0	0	0	0	0	0	0	0	0	0	0	0	0	0	0	0	0	0	0	0	0	0	0	0	0	0	0	AGCAGCCGCGGTAATACGGAGGATCCAAGCGTTATCCGGAATCATTGGGTTTAAAGGGTCCGTAGGCGGTTTATTAAGTCAGTGGTGAAAGCCCGCAGCTCAACTGTGGAACGGCCATTGATACTGATAGACTTGAATTACTGGGAAG
f__Comamonadaceae, 1127576	k__Bacteria, p__Proteobacteria, c__Betaproteobacteria, o__Burkholderiales, f__Comamonadaceae, g__, s__	5	0	0	0	0	0	0	0	0	0	0	0	0	0	0	0	0	3	0	0	0	0	0	0	0	0	0	0	0	0	0	0	0	0	0	0	0	0	0	2	0	0	0	0	0	GTGCCAGCAGCCGCGGTAATACGTAGGGTGCGAGCGTTAATCGGAATTACTGGGCGTAAAGCGTGCGCAGGCGGTTATATAAGACAGATGTGAAATCCCCGGGCTCAACCTGGGAACTGCATTTGAGACTGCAAGGCTAGAGTGTGGCAGAG
g__Pseudomonas, 728119	k__Bacteria, p__Proteobacteria, c__Gammaproteobacteria, o__Pseudomonadales, f__Pseudomonadaceae, g__Pseudomonas, s__	30	0	0	0	0	0	0	0	0	0	0	11	0	0	0	0	0	0	0	0	0	0	0	0	0	0	0	16	0	0	0	2	1	0	0	0	0	0	0	0	0	0	0	0	0	GTGCCAGCAGCCGCGGTAATACAGAGGGTGCAAGCGTTAATCGGAATTACTGGGCGTAAAGCGCGCGTAGGTGGTTCGTTAAGTTGGATGTGAAATCCCCGGGCTCAACCTGGGAACTGCATTCAAAACTGACGAGCTAGAGTATGGTAGAG
f__Gemmataceae, 3878646	k__Bacteria, p__Planctomycetes, c__Planctomycetia, o__Gemmatales, f__Gemmataceae, g__, s__	7	0	0	0	0	0	0	0	0	0	0	0	0	0	0	0	0	7	0	0	0	0	0	0	0	0	0	0	0	0	0	0	0	0	0	0	0	0	0	0	0	0	0	0	0	GCAGCCGCGGTAAGACGAACCGTCCAAACGTTATTCGGAATCACTGGGCTTAAAGGGCGCGTAGGCGGCCGAGCGGGTCGCGGGTGAAATCCCCCAGCTTAACTGGGGAACTGCCCTCGATACCACTGCGGCTCGAGGAAGGAAGG
g__Stenotrophomonas, 3907764	k__Bacteria, p__Proteobacteria, c__Gammaproteobacteria, o__Xanthomonadales, f__Xanthomonadaceae, g__Stenotrophomonas, s__	2	0	0	0	0	0	0	0	0	0	0	0	0	0	0	0	0	0	0	0	0	0	0	0	0	0	1	0	0	0	0	0	0	0	0	0	0	0	0	1	0	0	0	0	0	GTGCCAGCAGCCGCGGTAATACGAAGGGTGCAAGCGTTACTCGGAATTACTGGGCGTAAAGCGTGCGTAGGTGGTTATTTAAGTCCGTTGTGAAAGCCCTGGGCTCAACCTGGGAACTGCAGTGGATACTGGATGACTAAAATGTGGTAGA
f__Comamonadaceae, 974797	k__Bacteria, p__Proteobacteria, c__Betaproteobacteria, o__Burkholderiales, f__Comamonadaceae, g__, s__	155	0	1	0	0	0	139	0	0	0	1	0	14	0	0	0	0	0	0	0	0	0	0	0	0	0	0	0	0	0	0	0	0	0	0	0	0	0	0	0	0	0	0	0	0	GCAGCCGCGGTAATACGTAGGGTGCAAGCGTTAATCGGAATTACTGGGCGTAAAGCGTGCGCAGGCGGTTATGTAAGACAGATGTGAAATCCCCGGGCTCAACCTGGGAACTGCATTTGTGACTGCATAGCTTGAGTGCGGCAGAGG
g__Pseudomonas, 3913171	k__Bacteria, p__Proteobacteria, c__Gammaproteobacteria, o__Pseudomonadales, f__Pseudomonadaceae, g__Pseudomonas, s__	42	0	0	0	1	0	0	0	0	0	0	0	0	0	0	0	0	0	0	0	0	0	0	1	0	17	7	1	0	2	1	3	2	1	0	2	0	1	2	0	0	0	0	0	1	GTGCCAGCAGCCGCGGTAATACAGAGGGTGCAAGCGTTAATCGGAATTACTGGGCGTAAAGCGCGCGTAGGTGGTTCGTTAAGTTGGATGTGAAAGCCCCGGGCTCAACCTGGGGAACTGCATTCAAAACTGTCGAGCTAGAGTATGGTAGAG
g__Devosia, 3926111	k__Bacteria, p__Proteobacteria, c__Alphaproteobacteria, o__Rhizobiales, f__Hyphomicrobiaceae, g__Devosia, s__	653	0	48	68	140	7	2	0	0	67	0	0	0	118	0	0	0	0	0	53	0	0	101	0	3	7	0	0	1	5	0	0	0	3	0	1	8	14	6	0	0	0	1	0	0	AGCAGCCGCGGTAATACGAAGGGGGCTAGCGTTGTTCGGATTTACTGGGCGTAAAGCGCACGTAGGCGGATTGTTAAGTTAGGGGTGAAATCCCAGGGCTCAACCCTGGAACTGCCTTTAATACTGGCAATCTAGAGTCCGGAAGAGGT
f__Rhodocyclaceae, 1009729	k__Bacteria, p__Proteobacteria, c__Betaproteobacteria, o__Rhodocyclales, f__Rhodocyclaceae, g__, s__	9	0	0	0	0	0	7	0	0	0	0	0	0	0	0	0	0	2	0	0	0	0	0	0	0	0	0	0	0	0	0	0	0	0	0	0	0	0	0	0	0	0	0	0	0	GCAGCCGCGGTAATACGTAGGGTGCGAGCGTTAATCGGAATTACTGGGCGTAAAGCGTGCGCAGGCGGTTGTGTAAGACAGGTGTGAAATCCCCGGGCTTAACCTGGGAACTGCGCTTGTGACTGCACGGCTAGAGTACGGTAGAGG
o__Acidimicrobiales, 987899	k__Bacteria, p__Actinobacteria, c__Acidimicrobiia, o__Acidimicrobiales, f__, g__, s__	149	0	0	0	0	0	80	0	0	0	0	0	0	0	0	0	0	39	0	0	0	0	30	0	0	0	0	0	0	0	0	0	0	0	0	0	0	0	0	0	0	0	0	0	0	AGCAGCCGCGGTAACACGTAGGGGGCAAGCGTTGTCCGGATTTATTGGGCGTAAAGAGCTCGTAGGCGGTTCGCTAAGTCGGGTGTGAAACCTCCAGGCTCAACCTGGAGACGCCACCTGATACTGGTGTGACTCGAGTCCGGTAGGGG
f__Phyllobacteriaceae, 3966252	k__Bacteria, p__Proteobacteria, c__Alphaproteobacteria, o__Rhizobiales, f__Phyllobacteriaceae, g__, s__	3	0	0	0	0	0	2	0	0	0	0	0	0	0	0	0	0	1	0	0	0	0	0	0	0	0	0	0	0	0	0	0	0	0	0	0	0	0	0	0	0	0	0	0	0	AGCAGCCGCGGTAATACGAAGGGGGCTAGCGTTGTTCGGAATTACTGGGCGTAAAGCGCACGTAGGCGGATTGTTAAGTTAGGGGTGAAATCCCAGGGCTCAACCCTGGAACTGCCTCTAATACTGGCAATCTTGAGTTCGAGAGAGG
g__Zoogloea, 605324	k__Bacteria, p__Proteobacteria, c__Betaproteobacteria, o__Rhodocyclales, f__Rhodocyclaceae, g__Zoogloea, s__	2	0	0	0	0	0	1	0	0	0	0	0	0	0	0	0	0	1	0	0	0	0	0	0	0	0	0	0	0	0	0	0	0	0	0	0	0	0	0	0	0	0	0	0	0	AGCAGCCGCGGTAATACGTAGGGCGCGAGCGTTAATCGGAATTACTGGGCGTAAAGCGTGCGCAGGCGGTGATGTAAGACAGATGTGAAATCCCCGGGCTCAACCTGGGAACTGCGTTTGTGACTGCATCACTCGAGTACGGCAGAGGG
g__Pseudomonas, 926370	k__Bacteria, p__Proteobacteria, c__Gammaproteobacteria, o__Pseudomonadales, f__Pseudomonadaceae, g__Pseudomonas, s__	17	0	0	0	0	0	0	0	0	0	0	0	0	0	0	0	0	0	0	0	0	0	0	0	0	0	1	4	1	3	0	1	0	0	0	1	0	1	1	0	0	0	0	0	4	GTGCCAGCAGCCGCGGTAATACAGAGGGTGCAAGCGTTAATCGGAATTACTGGGCGTAAAGCGCGCGTAGGTGGTTCGTTAAGTTGGATGTGAAAGCCCCGGGCTCAACCTGGGAACTGCATTCAAAACTGGCGAGCTAGAGTATGGTAGAG
f__Aeromonadaceae, 1121651	k__Bacteria, p__Proteobacteria, c__Gammaproteobacteria, o__Aeromonadales, f__Aeromonadaceae, g__, s__	114	0	0	0	0	0	0	0	0	0	0	0	0	0	0	0	0	2	0	0	0	0	0	3	1	19	14	0	1	23	0	28	21	0	1	0	0	1	0	0	0	0	0	0	0	GTGCCAGCAGCCGCGGTAATACAGAGGGTGCAAGCGTTAATCGGAATTACTGGGCGTAAAGCGCACGCAGGCGGTTGGATAAGTTAGATGTGAAAGCCCCGGGCTCAACCTGGGAATTGCATTTAAAACTGTCCAGCTAGAGTCTTGTAGAG
f__Aeromonadaceae, 1117187	k__Bacteria, p__Proteobacteria, c__Gammaproteobacteria, o__Aeromonadales, f__Aeromonadaceae, g__, s__	5	0	0	0	0	0	0	0	0	0	0	0	0	0	0	0	0	0	0	0	0	0	0	0	0	0	0	0	2	0	0	1	1	1	0	0	0	0	0	0	0	0	0	0	0	GTGCCAGCAGCCGCGGTAATACGGAGGGTCCGAGCGTTAATCGGAATTACTGGGCGTAAAGCGCACGCAGGCGGCTGGATAAGTTAGATGTGAAAGCCCCGGGCTCAACCTGGGAATTGCATTTAAAACTGTCCAGCTAGAGTCTTGTAGAG
s__organophilum, 1109067	k__Bacteria, p__Proteobacteria, c__Alphaproteobacteria, o__Rhizobiales, f__Methylobacteriaceae, g__Methylobacterium, s__organophilum	26	0	0	0	0	0	0	0	0	0	0	0	0	0	0	0	0	10	0	0	0	0	0	0	0	0	0	0	1	0	0	3	0	0	2	0	0	0	0	1	0	5	1	0	3	GTGCCAGCAGCCGCGGTAATACGAAGGGGGCTAGCGTTGCTCGGAATCACTGGGCGTAAAGGGCGCGTAGGCGGCTATTTAAGTCGGGGGTGAAAGCCTGTGGCTCAACCACAGAATTGCCTTCGATACTGGATAGCTTGAGTATGGTAGAG
f__Comamonadaceae, 1125869	k__Bacteria, p__Proteobacteria, c__Betaproteobacteria, o__Burkholderiales, f__Comamonadaceae, g__, s__	2	0	0	0	0	0	2	0	0	0	0	0	0	0	0	0	0	0	0	0	0	0	0	0	0	0	0	0	0	0	0	0	0	0	0	0	0	0	0	0	0	0	0	0	0	GCAGCCGCGGTAATACGTAGGGTGCGAGCGTTAATCGGAATTACTGGGCGTAAAGCGTGCGCAGGCGGTTATGCAAGACAGATGTGAAATCCCCGGGCTCAACCTGGGAACTGCATTTGTGACTGCATAGCTTGAGTGCGGCAGAGG
g__Methylibium, 1134664	k__Bacteria, p__Proteobacteria, c__Betaproteobacteria, o__Burkholderiales, f__Comamonadaceae, g__Methylibium, s__	14	0	0	0	0	0	0	0	0	0	0	0	0	0	0	0	0	0	0	0	0	0	0	0	0	0	0	0	0	0	0	0	0	0	14	0	0	0	0	0	0	0	0	0	0	GTGCCAGCAGCCGCGGTAATACGTAGGGTGCAAGCGTTAATCGGAATTACTGGGCGTAAAGCGTGCGCAGGCGGCTTTGCAAGACAGATGTGAAATCCCCGGGCTCAACCTGGGAACTGCATTTGTGACTGCAAGGCTAGAGTACGGTAGAG
f__Phyllobacteriaceae, 1123592	k__Bacteria, p__Proteobacteria, c__Alphaproteobacteria, o__Rhizobiales, f__Phyllobacteriaceae, g__, s__	3	0	0	0	0	0	3	0	0	0	0	0	0	0	0	0	0	0	0	0	0	0	0	0	0	0	0	0	0	0	0	0	0	0	0	0	0	0	0	0	0	0	0	0	0	GCAGCCGCGGTAATACGAAGGGGGCTAGCGTTGTTCGGAATTACTGGGCGTAAAGCGCACGTAGGCGGATTGTTAAGTTAGGGGTGAAATCCCAGGGCTCAACCCTGGAACTGCCTTTAATACTGGCAATCTCGAGATCCGAGAGAGG
g__Mogibacterium, 787663	k__Bacteria, p__Firmicutes, c__Clostridia, o__Clostridiales, f__[Mogibacteriaceae], g__Mogibacterium, s__	3	0	0	0	0	0	0	0	0	0	0	0	0	0	0	0	0	0	0	0	0	0	0	0	0	0	3	0	0	0	0	0	0	0	0	0	0	0	0	0	0	0	0	0	0	GTGCCAGCAGCCGCGGTAATACGTAGGGGGCAAGCGTTATCCGGAATTATTGGGCGTAAAGAGTGCGTAGGTGGTTACCTAAGCGCAAGGTTTAATTTAGAGGCTCAACCTCTACTTGCCTTGCGAACTGGGCTACTTGAGTGCAGGAGGG
g__Diaphorobacter, 843469	k__Bacteria, p__Proteobacteria, c__Betaproteobacteria, o__Burkholderiales, f__Comamonadaceae, g__Diaphorobacter, s__	22	0	0	0	0	0	20	0	0	0	0	0	0	0	0	0	0	0	0	0	0	0	0	0	0	0	0	0	2	0	0	0	0	0	0	0	0	0	0	0	0	0	0	0	0	AGCAGCCGCGGTAATACGTAGGGTGCAAGCGTTAATCGGAATTACTGGGCGTAAAGCGTGCGCAGGCGGTTATGTAAGACAGAGGTGAAATCCCCGGGCTCAACCTGGGAACTGCCTTTGTGACTGCAAGGCTGGAGTACGGCAGAGGG
f__Oxalobacteraceae, 759624	k__Bacteria, p__Proteobacteria, c__Betaproteobacteria, o__Burkholderiales, f__Oxalobacteraceae, g__, s__	16	0	0	0	0	0	0	0	0	0	0	0	0	0	0	0	0	0	0	0	0	0	0	0	0	0	0	0	0	0	0	0	0	0	4	0	0	0	0	6	2	0	0	3	1	GTGCCAGCAGCCGCGGTAATACGTAGGGTGCAAGCGTTAATCGGAATTACTGGGCGTAAAGCGTGCGCAGGCGGTTTCGTAAGTCTGTCGTGAAATCCCCGGGCTTAACCTGGGAATGGCGATGGAGACTGCGAGGCTAGAGTTTGGCAGA
f__Enterobacteriaceae, 1147571	k__Bacteria, p__Proteobacteria, c__Gammaproteobacteria, o__Enterobacteriales, f__Enterobacteriaceae, g__, s__	7	0	0	0	0	0	0	0	0	0	0	0	0	0	0	0	0	7	0	0	0	0	0	0	0	0	0	0	0	0	0	0	0	0	0	0	0	0	0	0	0	0	0	0	0	GTGCCAGCAGCCGCGGTAATACGGAGGGTGCAAGCGTTAATCGGAATTACTGGGCGTAAAGCGCACGCAGGCGGTTGGATAAGTTAGATGTGAAAGCCCCGGGCTCAACCTGGGAACTGCCTTTGTGACTGCAAGGCTAGAGTACGGCAGAGG
c__Gammaproteobacteria, 4187380	k__Bacteria, p__Proteobacteria, c__Gammaproteobacteria, o__, f__, g__, s__	8	0	0	0	0	0	8	0	0	0	0	0	0	0	0	0	0	0	0	0	0	0	0	0	0	0	0	0	0	0	0	0	0	0	0	0	0	0	0	0	0	0	0	0	0	GCAGCCGCGGTAATACGGAGGGTGCAAGCGTTAATCGGAATTACTGGGCGTAAAGCGCGCGTAGGCGGCTGAGTAAGTCGATTGTGAAATCCCCGGGCTCAACCTGGGAATTGCAGTCGAGACTGCTCGGCTAGAGTGTGGGAGAGGG
g__Pseudomonas, 751973	k__Bacteria, p__Proteobacteria, c__Gammaproteobacteria, o__Pseudomonadales, f__Pseudomonadaceae, g__Pseudomonas, s__	38	0	0	0	0	0	0	0	0	0	0	0	0	0	0	0	0	0	0	0	0	0	0	0	0	13	4	0	0	3	0	6	5	3	0	1	0	0	1	0	0	1	0	0	1	GTGCCAGCAGCCGCGGTAATACAGAGGGTGCAAGCGTTAATCGGAATTACTGGGCGTAAAGCGCGCGTAGGTGGTTCGTTAAGTTGGATGTGAGATCCCCGGGCTCAACCTGGGAACTGCATTCAAAACTGTCGAGCTAGAGTATGGTAGA
s__succinicans, 867450	k__Bacteria, p__Bacteroidetes, c__Flavobacteriia, o__Flavobacteriales, f__Flavobacteriaceae, g__Flavobacterium, s__succinicans	2	0	0	0	0	0	2	0	0	0	0	0	0	0	0	0	0	0	0	0	0	0	0	0	0	0	0	0	0	0	0	0	0	0	0	0	0	0	0	0	0	0	0	0	0	GCAGCCGCGGTAATACGGAGGATCCAAGCGTTATCCGGAATCATTGGGTTTAAAGGGTCCGTAGGCGGTCTAGTAAGTCAGTGGTGAAAGCCCATCGCTCAACGGTGGAACGGCCATTGATACTGCTGGACTTGAATTATTAGGAAG
g__Chelativorans, 1144787	k__Bacteria, p__Proteobacteria, c__Alphaproteobacteria, o__Rhizobiales, f__Phyllobacteriaceae, g__Chelativorans, s__	13	0	0	0	0	0	0	0	0	0	0	0	0	0	0	0	0	0	0	0	0	0	0	0	0	0	0	0	0	8	0	0	0	0	0	0	0	5	0	0	0	0	0	0	0	GTGCCAGCAGCCGCGGTAATACGAAGGGGGCTAGCGTTGTTCGGAATTACTGGGCGTAAAGCGCACGTAGGCGGATCGTTAAGTGAGGGGTGAAATCCCAGGGCTCAACCCTGGAACTGCCTCTCATACTGGCGATCTCGAGTTCGAGAGA
f__Pseudoalteromonadaceae, 4270835	k__Bacteria, p__Proteobacteria, c__Gammaproteobacteria, o__Vibrionales, f__Pseudoalteromonadaceae, g__, s__	257	0	0	0	0	0	0	0	0	0	0	0	0	0	0	0	0	0	0	0	0	0	0	137	0	3	3	1	15	5	1	0	2	0	65	2	0	0	10	12	0	0	1	0	0	GTGCCAGCAGCCGCGGTAATACGGAGGGTGCAAGCGTTAATCGGAATTACTGGGCGTAAAGCGCATGCAGGTGGTTTGTTAAGTCAGATGTGAAAGCCCTGGGCTCAACCTAGGAATTGCATTTGAAACTGACAAGCTAGAGTACTGTAGAG
f__Rhizobiaceae, 4294646	k__Bacteria, p__Proteobacteria, c__Alphaproteobacteria, o__Rhizobiales, f__Rhizobiaceae, g__, s__	343	0	0	0	0	0	0	0	0	0	0	0	0	0	0	0	0	0	0	0	0	0	0	16	0	27	45	0	0	63	0	82	57	25	0	0	0	10	14	0	0	0	2	0	2	GTGCCAGCAGCCGCGGTAATACGAAGGGGGCTAGCGTTGTTCGGAATTACTGGGCGTAAAGCGCACGTAGGCGGACATTTAAGTCAGGGGTGAAATCCCAGAGCTCAACTCTGGAACTGCCTTTGATACTGGGTGTCTAGAGTATGGAAGA
f__Neisseriaceae, 4296513	k__Bacteria, p__Proteobacteria, c__Betaproteobacteria, o__Neisseriales, f__Neisseriaceae, g__, s__	55	0	0	0	0	0	0	0	0	0	0	0	0	0	0	0	0	0	0	0	0	0	0	0	0	0	0	12	2	0	0	0	0	0	0	16	0	0	9	0	16	0	0	0	0	GTGCCAGCAGCCGCGGTAATACGTAGGGTGCGAGCGTTAATCGGAATTACTGGGCGTAAAGCGGGCGCAGACGGTTACTTAAGCAGGATGTGAAATCCCCGGGCTCAACCTGGGAATTGCGTTCTGAACTGGGTGGCTAGAGTGTGTCAGA
g__Neisseria, 4297271	k__Bacteria, p__Proteobacteria, c__Betaproteobacteria, o__Neisseriales, f__Neisseriaceae, g__Neisseria, s__	78	0	0	0	0	0	0	0	0	0	0	0	0	0	0	0	0	0	0	0	0	0	0	1	0	21	0	0	0	0	0	0	0	0	0	0	54	0	0	0	0	0	0	2	0	GTGCCAGCAGCCGCGGTAATACGTAGGGTGCGAGCGTTAATCGGAATTACTGGGCGTAAAGCGGGCGCAGACGGTTACTTAAGCAGGATGTGAAATCCCCGGGCTCAACCTGGGAACTGCGTTCTGAACTGGGTGACTAGAGTGTGTCAGAG
f__[Weeksellaceae], 4298633	k__Bacteria, p__Bacteroidetes, c__Flavobacteriia, o__Flavobacteriales, f__[Weeksellaceae], g__, s__	90	0	0	0	0	0	0	0	0	0	0	0	0	90	0	0	0	0	0	0	0	0	0	0	0	0	0	0	0	0	0	0	0	0	0	0	0	0	0	0	0	0	0	0	0	AGCAGCCGCGGTAATACGGAGGGTGCAAGCGTTATCCGGATTTATTGGGTTTAAAGGGTCCGTAGGTGGGCTGATAAGTCAGCGGTGAAATCCTGCAGCTTAACTGTAGAACTGCCGTTGATACTGTTAGTCTTGAGTGTATTTGAAGT
g__Acidovorax, 4301165	k__Bacteria, p__Proteobacteria, c__Betaproteobacteria, o__Burkholderiales, f__Comamonadaceae, g__Acidovorax, s__	501	0	0	0	0	0	45	0	0	0	0	0	0	0	0	0	0	450	0	0	0	0	0	0	0	0	0	0	0	0	0	0	0	0	5	0	0	0	0	1	0	0	0	0	0	AGCAGCCGCGGTAATACGTAGGGTGCGAGCGTTAATCGGAATTACTGGGCGTAAAGCGTGCGCAGGCGGTGATGTAAGACAGATGTGAAATCCCCGGGCTCAACCTGGGAACTGCATTTGTGACTGCATCGCTGGAGTACGGCAGAGGG
o__Rhizobiales, 4301663	k__Bacteria, p__Proteobacteria, c__Alphaproteobacteria, o__Rhizobiales, f__, g__, s__	145	0	0	0	0	0	0	0	0	0	0	0	0	0	0	0	0	0	0	39	0	31	0	0	6	0	1	25	0	3	7	0	4	0	0	0	11	2	0	1	15	0	0	0	0	GTGCCAGCAGCCGCGGTAATACGAAGGGGGCTAGCGTTGTTCGGAATTACTGGGCGTAAAGCGCGCGTAGGCGGACATTTAAGTCAGGGGTGAAATCCCGGGGCTCAACCTCGGAACTGCCTTTGATACTGGGTGTCTGGAGTCCGGAAGAG
g__Agrobacterium, 4304056	k__Bacteria, p__Proteobacteria, c__Alphaproteobacteria, o__Rhizobiales, f__Rhizobiaceae, g__Agrobacterium, s__	5313	0	0	0	0	0	368	0	0	0	1	0	1	71	9	3	0	4647	0	0	2	0	0	0	0	0	0	0	4	0	0	0	0	0	171	20	0	0	11	0	0	0	1	0	4	AGCAGCCGCGGTAATACGAAGGGGGCTAGCGTTGTTCGGAATTACTGGGCGTAAAGCGCACGTAGGCGGATCGATCAGTCAGGGGTGAAATCCCAGAGCTCAACTCTGGAACTGCCTTTGATACTGTCGATCTGGAGTATGGAAGAGGT
g__Mycoplana, 4304512	k__Bacteria, p__Proteobacteria, c__Alphaproteobacteria, o__Caulobacterales, f__Caulobacteraceae, g__Mycoplana, s__	2	0	0	0	0	0	0	0	0	0	0	0	0	0	0	0	0	0	0	0	0	0	0	2	0	0	0	0	0	0	0	0	0	0	0	0	0	0	0	0	0	0	0	0	0	GTGCCAGCAGCCGCGGTAATACGAAGGGGGCTAGCGTTGCTCGGAATTACTGGGCGTAAAGGGAGCGTAGGCGGACATTTAAGTCAGGGGTGAAATCCCAGAGCTCAACTCTGGAACTGCCTTTGATACTGGATGTCTTGAGTGTGAGAGAGGTA
o__Rickettsiales, 4305126	k__Bacteria, p__Proteobacteria, c__Alphaproteobacteria, o__Rickettsiales, f__, g__, s__	4	0	0	0	0	0	0	0	0	0	0	0	0	0	0	0	0	0	0	0	0	0	0	0	0	0	0	0	0	0	0	0	0	0	4	0	0	0	0	0	0	0	0	0	0	AGCAGCCGCGGTAATACAGAGAGGGCAAGCGTTGTCCGGAATGACTGGGCGTAAAGCGCGCGCAGGCGGTTTCTTAAGTTGGATGTGAAATCCCCGGGCTTAACCTGGGAACTGCATTCGATACTGGGGAACTAGAGGCCGAGAGAGG
f__Comamonadaceae, 4308189	k__Bacteria, p__Proteobacteria, c__Betaproteobacteria, o__Burkholderiales, f__Comamonadaceae, g__, s__	2	0	0	0	0	0	0	0	0	0	0	0	0	0	0	0	0	0	0	0	0	0	0	0	0	0	0	0	2	0	0	0	0	0	0	0	0	0	0	0	0	0	0	0	0	GTGCCAGCAGCCGCGGTAATACGTAGGGTGCGAGCGTTAATCGGAATTACTGGGCGTAAAGCGTGCGCAGGCGGTTGTGCAAGACAGGTGTGAAATCCCCGGGCTTAACCTGGGAACTGCACTTGTGACTGCACGGCTAGAGTACGGTAGA
o__Rhizobiales, 4308332	k__Bacteria, p__Proteobacteria, c__Alphaproteobacteria, o__Rhizobiales, f__, g__, s__	5	0	0	0	0	0	0	0	0	0	0	0	0	0	0	0	0	5	0	0	0	0	0	0	0	0	0	0	0	0	0	0	0	0	0	0	0	0	0	0	0	0	0	0	0	GCAGCCGCGGTAATACGAAGGGGGCTAGCGTTGTTCGGAATTACTGGGCGTAAAGCGCACGTAGGCGGGTCGTTAAGTCAGGGGTGAAATCCCAGAGCTCAACTCTGGAACTGCCTTTGATACTGGCGACCTAGAGTTCGGAAGAGGT
g__Ochrobactrum, 4308371	k__Bacteria, p__Proteobacteria, c__Alphaproteobacteria, o__Rhizobiales, f__Brucellaceae, g__Ochrobactrum, s__	2	0	0	0	0	0	0	0	0	0	0	0	0	0	0	0	0	0	0	0	2	0	0	0	0	0	0	0	0	0	0	0	0	0	0	0	0	0	0	0	0	0	0	0	0	GCCGCGGTAATACGAAGGGGGCTAGCGTTGTTCGGATTTACTGGGCGTAAAGCGCACGTAGGCGGACTTTTAAGTCAGGGGTGAAATCCCGGGGCTCAAACCCCGGAACTGCCTTTGATACTGGAAGTCTTGAGTATGGTAGAGGTGA
f__Rhizobiaceae, 4308376	k__Bacteria, p__Proteobacteria, c__Alphaproteobacteria, o__Rhizobiales, f__Rhizobiaceae, g__, s__	2	0	0	0	0	0	1	0	0	0	0	0	0	0	0	0	0	1	0	0	0	0	0	0	0	0	0	0	0	0	0	0	0	0	0	0	0	0	0	0	0	0	0	0	0	GTGCCAGCAGCCGCGGTAATACGAAGGGGGCTAGCGTTGTTCGGAATTACTGGGCGTAAAGCGCACGTAGGCGGGTATTTAAGTCAGGGGTGAAATCCCAGAGCTCAACTCTGGAACTGCCTTTGATACTGGGTACCTAGAGTATGGAAGAG
g__Zoogloea, 4309358	k__Bacteria, p__Proteobacteria, c__Betaproteobacteria, o__Rhodocyclales, f__Rhodocyclaceae, g__Zoogloea, s__	65	0	0	0	0	0	0	0	0	0	0	0	0	0	0	0	0	65	0	0	0	0	0	0	0	0	0	0	0	0	0	0	0	0	0	0	0	0	0	0	0	0	0	0	0	AGCAGCCGCGGTAATACGTAGGGTGCGAGCGTTAATCGGAATTACTGGGCGTAAAGCGTGCGCAGGCGGTTATATAAGACAGATGTGAAATCCCCGGGCTCAACCTGGGAACTGCGTTTGTGACTGTATGACTAGAGTACGGCAGAGGG
g__Fluviicola, 4309997	k__Bacteria, p__Bacteroidetes, c__Flavobacteriia, o__Flavobacteriales, f__Cryomorphaceae, g__Fluviicola, s__	10	0	0	0	0	0	0	0	0	0	0	0	0	0	0	0	0	0	1	0	9	0	0	0	0	0	0	0	0	0	0	0	0	0	0	0	0	0	0	0	0	0	0	0	0	GCAGCCGCGGTAATACGGAGGGTGCAAGCGTTATCCGGAATCATTGGGTTTAAAGGGTCCGCAGGCGGTTATATAAGTCAGTGGTGAAAGCCTACAGCTCAACTGTAGAACTGCCATTGATACTGTATGACTTGAATTCGATCGAAGT
g__Oribacterium, 4310395	k__Bacteria, p__Firmicutes, c__Clostridia, o__Clostridiales, f__Lachnospiraceae, g__Oribacterium, s__	12	0	0	0	0	0	0	0	0	0	0	0	0	0	0	0	0	0	0	0	0	0	0	0	0	0	0	0	0	0	0	0	0	0	0	0	0	0	0	0	12	0	0	0	0	GTGCCAGCAGCCGCGGTAATACGTAGGGGGCAAGCGTTATCCGGATTTACTGGGTGTAAAGGGAGCGTAGACGGAGTGGCAAGTCTGAAGTGAAAACCCTGGGCTCAACCTGGGGACTGCTTTGGAAACTGTTAATCTAGAGTGTTGGAGA
f__Comamonadaceae, 4312335	k__Bacteria, p__Proteobacteria, c__Betaproteobacteria, o__Burkholderiales, f__Comamonadaceae, g__, s__	19	0	0	0	0	0	14	0	0	0	0	3	1	0	0	0	0	1	0	0	0	0	0	0	0	0	0	0	0	0	0	0	0	0	0	0	0	0	0	0	0	0	0	0	0	GCAGCCGCGGTAATACGTAGGGTGCAAGCGTTAATCGGAATTACTGGGCGTAAAGCGTGCGCAGGCGGCTTTGCAAGACAGATGTGAAATCCCCGGGCTCAACCTGGGAACTGCATTTGTGACTGCAAGGCTAGAGTGCGGCAGAGG
s__petroleiphilum, 4313865	k__Bacteria, p__Proteobacteria, c__Betaproteobacteria, o__Burkholderiales, f__Comamonadaceae, g__Methylibium, s__petroleiphilum	573	0	0	0	0	0	77	0	0	0	0	0	0	0	0	0	0	392	0	0	0	0	0	88	0	0	0	0	0	0	0	0	0	0	15	0	0	0	0	1	0	0	0	0	0	AGCAGCCGCGGTAATACGTAGGGTGCAAGCGTTAATCGGAATTACTGGGCGTAAAGCGTGCGCAGGCGGCTTTGCAAGACAGATGTGAAATCCCCGGGCTCAACCTGGGAACTGCATTTGTGACTGCAAGGCTGGAGTGCGGCAGAGGG
g__Variovorax, 4314035	k__Bacteria, p__Proteobacteria, c__Betaproteobacteria, o__Burkholderiales, f__Comamonadaceae, g__Variovorax, s__	9	0	0	0	0	0	4	0	0	0	0	0	0	0	0	0	0	3	0	0	0	0	0	0	0	0	0	0	0	0	0	0	0	0	2	0	0	0	0	0	0	0	0	0	0	AGCAGCCGCGGTAATACGTAGGGTGCGAGCGTTAATCGGAATTACTGGGCGTAAAGCGTGCGCAGGCGGTGATGTAAGACAGATGTGAAATCCCTGGGCTCAACCTGGGAACTGCATTTGTGACTGCATCGCTGGAGTGCGGCAGAGG
f__Comamonadaceae, 4317276	k__Bacteria, p__Proteobacteria, c__Betaproteobacteria, o__Burkholderiales, f__Comamonadaceae, g__, s__	2	0	0	0	0	0	0	0	0	0	0	0	0	0	0	0	0	0	0	0	0	0	0	0	0	0	1	0	0	0	0	1	0	0	0	0	0	0	0	0	0	0	0	0	0	GTGCCAGCAGCCGCGGTAATACGTAGGGTGCGAGCGTTAATCGGAATTACTGGGCGTAAAGCGTGCGCAGGCGGTCATATAAGACAGATGTGAAATCCCCGGGCTCAACCTGGGAACTGCATTTGTGACTGTATGGCTAGAGTGCGGCAGA
f__Phyllobacteriaceae, 4319281	k__Bacteria, p__Proteobacteria, c__Alphaproteobacteria, o__Rhizobiales, f__Phyllobacteriaceae, g__, s__	2	0	0	0	0	0	0	0	0	0	0	0	0	0	0	0	0	2	0	0	0	0	0	0	0	0	0	0	0	0	0	0	0	0	0	0	0	0	0	0	0	0	0	0	0	GCAGCCGCGGTAATACGAAGGGGGCTAGCGTTGTTCGGAATTACTGGGCGTAAAGCGCACGTAGGCGGATCGATCAGTTAGGGGTGAAATCCCAGGGCTCAACCCTGGAACTGCCTCTAATACTGTCGATCTGGAGTTCGAGAGAGG
f__Chitinophagaceae, 4319468	k__Bacteria, p__Bacteroidetes, c__[Saprospirae], o__[Saprospirales], f__Chitinophagaceae, g__, s__	41	0	0	0	0	0	0	0	0	0	0	0	0	0	0	0	0	0	0	0	0	0	0	28	0	0	0	0	0	0	0	0	0	0	0	0	0	0	0	13	0	0	0	0	0	GTGCCAGCAGCCGCGGTAATACGGAGGGTGCAAGCGTTATCCGGATTCACTGGGTTTAAAGGGTGCGTAGGTGGATTAGTAAGTCAGTGGTGAAATCTTCGAGCTTAACTCGGAAACTGCCATTGATACTATTAATCTTGAATATTGTGGA
g__Novosphingobium, 4319587	k__Bacteria, p__Proteobacteria, c__Alphaproteobacteria, o__Sphingomonadales, f__Sphingomonadaceae, g__Novosphingobium, s__	8	0	0	0	0	0	1	0	0	0	0	0	0	0	0	0	0	0	0	0	0	1	0	0	2	0	0	0	4	0	0	0	0	0	0	0	0	0	0	0	0	0	0	0	0	GTGCCAGCAGCCGCGGTAATACGGAGGGAGCTAGCGTTGTTCGGAATTACTGGGCGTAAAGCGCACGTAGGCGGTACATCAAGTCAGGGGTGAAAGCCCGGAGCTCAACTCCGGAACTGCCCTTGAAACTAGTGTACTAGAATCTTGGAGAG
g__Flavisolibacter, 4323607	k__Bacteria, p__Bacteroidetes, c__[Saprospirae], o__[Saprospirales], f__Chitinophagaceae, g__Flavisolibacter, s__	42	0	0	0	0	0	28	0	0	0	0	0	5	0	0	0	0	8	1	0	0	0	0	0	0	0	0	0	0	0	0	0	0	0	0	0	0	0	0	0	0	0	0	0	0	AGCAGCCGCGGTAATACGGAGGGTGCAAGCGTTATCCGGATTCACTGGGTTTAAAGGGTGCGTAGGAGGGCAGGTAAGTCAGTGGTGAAATCTCCGAGCTTAACTTGGAAACTGCCATTGATACTATCTGTCTTGAATATTGTGGAGGT
f__Oxalobacteraceae, 4323897	k__Bacteria, p__Proteobacteria, c__Betaproteobacteria, o__Burkholderiales, f__Oxalobacteraceae, g__, s__	4	0	0	0	0	0	0	4	0	0	0	0	0	0	0	0	0	0	0	0	0	0	0	0	0	0	0	0	0	0	0	0	0	0	0	0	0	0	0	0	0	0	0	0	0	GCAGCCGCGGTAATACGTAGGGTGCAAGCGTTAATCGGAAATTACTGGGCGTAAAGCGTGCGCAGGCGGTTTTATAAGTCTGATGTGAAATCCCCGGGCTCAACCTGGGAACTGCATTGGAGACTGTAAGGCTAGAGTGTGTCAGAGG
g__Leptotrichia, 4324464	k__Bacteria, p__Fusobacteria, c__Fusobacteriia, o__Fusobacteriales, f__Leptotrichiaceae, g__Leptotrichia, s__	24	0	0	0	0	0	0	0	0	0	0	0	0	0	0	0	0	0	0	0	0	0	0	0	0	0	0	0	0	0	0	0	0	0	0	0	24	0	0	0	0	0	0	0	0	GTGCCAGCAGCCGCGGTAATACGTATGTCGCAAGCGTTATCCGGAATTATTGGGCATAAAGGGCATCTAGGCGGCCAGGCAAGTCTGGGGTGAAAACTTGCGGCTCAACCGCAAGCCTGCCCTGGAAACTGCCTGGCTAGAGTGCTGGAGA
o__Sphingobacteriales, 4325369	k__Bacteria, p__Bacteroidetes, c__Sphingobacteriia, o__Sphingobacteriales, f__, g__, s__	6	0	0	0	0	0	0	0	0	0	0	0	0	0	0	0	0	0	0	0	0	0	0	0	0	0	2	0	0	0	0	0	1	0	2	0	0	0	0	1	0	0	0	0	0	CAGCCATGCCGCGTGCAGGAAGACGGCCCTATGGGTTGTAAACTGCTTTTGTACCAGAGAAAACCCTTCTACGTGTAGAAGGTTGATAGTATGGTAAGAATAAGCATCGGCTAACTTCGTGCCAGCAGCCGCGGTAAGACGAAGGATG
g__Rhodoplanes, 4326152	k__Bacteria, p__Proteobacteria, c__Alphaproteobacteria, o__Rhizobiales, f__Hyphomicrobiaceae, g__Rhodoplanes, s__	4	0	0	0	0	0	2	0	0	0	0	0	2	0	0	0	0	0	0	0	0	0	0	0	0	0	0	0	0	0	0	0	0	0	0	0	0	0	0	0	0	0	0	0	0	GCAGCCGCGGTAATACGAAGGGGGCTAGCGTTGCTCGGAATCACTGGGCGTAAAGCGCACGTAGGCGGCTTTCTAAGTCAGGGGTGAAATCCTGGAGCTCAACTCCAGAACTGCCTTTGATACTGGAGAGCTTGAGTTCGGGAGAGG
g__Delftia, 4328567	k__Bacteria, p__Proteobacteria, c__Betaproteobacteria, o__Burkholderiales, f__Comamonadaceae, g__Delftia, s__	26	0	0	0	0	0	2	0	0	0	0	0	0	0	1	0	2	2	7	0	1	0	1	6	0	1	0	2	1	0	0	0	0	0	0	0	0	0	0	0	0	0	0	0	0	AGCAGCCGCGGTAATACGTAGGGTGCGAGCGTTAATCGGAATTACTGGGCGTAAAGCGTGCGCAGGCGGTTATGTAGGACAGATGTGAAATCCCCGGGCTCAACCTGGGAACTGCATTTGTGACTGCATGGCTAGAGTACGGTAGAGG
g__Pedobacter, 4339769	k__Bacteria, p__Bacteroidetes, c__Sphingobacteriia, o__Sphingobacteriales, f__Sphingobacteriaceae, g__Pedobacter, s__	100	0	0	0	0	0	0	0	0	0	0	0	0	0	0	0	0	0	0	0	0	0	0	5	0	2	4	6	36	2	0	5	3	3	20	2	0	1	0	5	0	0	0	0	6	GTGCCAGCAGCCGCGGTAATACGGAGGATCCAAGCGTTATCCGGATTTATTGGGTTTAAAGGGTGCGTAGGCGGCCTGTTAAGTCAGGGGTGAAAGACGGTGGCTCAACCATCGCAGTGCCCTTGATACTGATGGGCTTGAATTAACTAGAGGT
g__Streptococcus, 4344213	k__Bacteria, p__Firmicutes, c__Bacilli, o__Lactobacillales, f__Streptococcaceae, g__Streptococcus, s__	2	2	0	0	0	0	0	0	0	0	0	0	0	0	0	0	0	0	0	0	0	0	0	0	0	0	0	0	0	0	0	0	0	0	0	0	0	0	0	0	0	0	0	0	0	GCCCGCGGTAATACGTAGGTCCCGAGCGTTGTCCGGATTTATTGGGCGTAAAGCGAGCGCAGGCGGTTAGATAAGTCTGAAGTTAAAGGCTGTGGCTTAACCATAGTACGCTTTGGAAACTGTTTAACTTGAGTGCAAGAGGGGA
f__Oxalobacteraceae, 4348382	k__Bacteria, p__Proteobacteria, c__Betaproteobacteria, o__Burkholderiales, f__Oxalobacteraceae, g__, s__	15	0	0	0	0	0	0	0	0	0	0	0	0	0	0	0	0	0	0	0	0	0	0	1	0	0	0	0	0	0	0	0	0	0	0	0	0	0	0	2	0	0	0	8	4	GTGCCAGCAGCCGCGGTAATACGTAGGGTGCAAGCGTTAATCGGAATTACTGGGCGTAAAGCGTGCGCAGGCGGTTTTGTAAGTCTGTCGTGAAATCCCCGGGCTTAACCTGGGAATGGCGATGGAGACTGCAAGGCTAGAGTTTGGCAGA
o__RF39, 4349867	k__Bacteria, p__Tenericutes, c__Mollicutes, o__RF39, f__, g__, s__	9	0	0	0	0	0	0	0	0	0	0	0	0	0	0	0	0	0	0	0	0	0	0	0	0	0	0	9	0	0	0	0	0	0	0	0	0	0	0	0	0	0	0	0	0	GTGCCAGCAGCCGCGGTAATACGTAGGGAGCGAGTGTTATCCGGATTTATTGGGTGTAAAGTGTGTGTAGGCGGTTTTATAAGTCTAGGGTCTAAGCCCGGAGCTCAACTCCGGTTCGCCTTGGAAACTGTAAGACTTGAGTTTGGTAGAG
g__Sediminibacterium, 4354277	k__Bacteria, p__Bacteroidetes, c__[Saprospirae], o__[Saprospirales], f__Chitinophagaceae, g__Sediminibacterium, s__	50	0	0	0	0	0	0	0	0	0	0	0	0	0	0	0	0	0	0	0	0	0	0	0	0	0	0	0	50	0	0	0	0	0	0	0	0	0	0	0	0	0	0	0	0	GTGCCAGCAGCCGCGGTAATACGGAGGGTGCAAGCGTTATCCGGATTCACTGGGTTTAAAGGGTGCGTAGGCGGGCAGTTAAGTCAGTGGTGAAATCCTAGAGCTTAACTCTAGAACTGCCATTGATACTATCTGTCTTGAATATTGTGGA
f__Enterobacteriaceae, 4354477	k__Bacteria, p__Proteobacteria, c__Gammaproteobacteria, o__Enterobacteriales, f__Enterobacteriaceae, g__, s__	19	1	0	2	1	2	0	0	0	3	0	0	0	1	0	0	0	0	1	1	4	1	2	0	0	0	0	0	0	0	0	0	0	0	0	0	0	0	0	0	0	0	0	0	0	GTGCCAGCAGCCGCGGTAATACGGAGGGTGCAAGCGTTAATCGGAATTACTGGGCGTAAAGCGCACGCAGGCGGTTCGTTAAGTCAGATGTGAAATCCCCGGGCTCAACCTGGGAACTGCATCTGATACTGGCAAGCTTGAGTCTCGTAGAG
g__Flavobacterium, 4354769	k__Bacteria, p__Bacteroidetes, c__Flavobacteriia, o__Flavobacteriales, f__Flavobacteriaceae, g__Flavobacterium, s__	6835	0	0	0	0	0	0	0	0	0	0	0	0	0	0	0	0	0	0	0	0	0	0	330	1	1	25	12	2040	1	9	6	7	53	1980	0	19	12	9	2302	1	1	16	6	4	CGTGCCAGCAGCCGCGGTAATACGGAGGATGCAAGCGTTATCCGGAATCATTGGGTTTAAAGGGTCCGTAGGCGGTTTAATAAGTCAGTGGTGAAAGCCCATCGCTCAACGATGGAACGGCCATTGATACTGTTAAACTTGAATTATTAGGAA
g__Pedobacter, 4357116	k__Bacteria, p__Bacteroidetes, c__Sphingobacteriia, o__Sphingobacteriales, f__Sphingobacteriaceae, g__Pedobacter, s__	567	0	52	0	0	0	3	0	0	0	0	0	0	0	0	0	0	0	0	0	0	0	0	37	0	7	37	51	164	23	2	21	12	11	103	7	0	1	0	26	0	0	3	2	5	GTGCCAGCAGCCGCGGTAATACGGAGGATCCGAGCGTTATCCGGATTTATTGGGTTTAAAGGGTGCGTAGGCGGCCTGTTAAGTCAGGGGTGAAAGACGGTGGCTCAACCATCGCAGTGCCCTTGATACTGATGGGCTTGAATATACTAGAG
f__Xanthomonadaceae, 4361455	k__Bacteria, p__Proteobacteria, c__Gammaproteobacteria, o__Xanthomonadales, f__Xanthomonadaceae, g__, s__	24	0	0	0	0	0	0	0	0	0	0	0	0	0	0	0	0	0	0	0	0	0	0	0	0	0	0	0	20	0	0	1	0	0	3	0	0	0	0	0	0	0	0	0	0	GTGCCAGCAGCCGCGGTAATACGAAGGGTGCAAGCGTTACTCGGAATTACTGGGCGTAAAGCGTGCGTAGGTGGTGGTTTAAGTCAGATGTGAAAGCCCTGGGCTCAACCTGGGAACTGCATTTGATACTGGATCACTAGAGTGCGGTAGA
o__Rhizobiales, 4362306	k__Bacteria, p__Proteobacteria, c__Alphaproteobacteria, o__Rhizobiales, f__, g__, s__	2	0	0	0	0	0	0	0	0	0	0	0	0	0	0	0	0	0	0	0	0	0	0	1	0	0	0	0	0	0	0	0	0	0	0	0	0	0	0	1	0	0	0	0	0	GTGCCAGCAGCCGCGGTAATACGAAGGGGGGCTAGCGTTGTTCGGAATTACTGGGCGTAAAGCGCACGTAGGCGGGTATTTAAGTCAGGGGTGAAATCCCAGAGCTCAACTCTGGAACTGCCTTTGATACTGGGTACCTAGAGTATGGAA
g__Agrobacterium, 4362795	k__Bacteria, p__Proteobacteria, c__Alphaproteobacteria, o__Rhizobiales, f__Rhizobiaceae, g__Agrobacterium, s__	217	0	0	0	0	0	13	0	0	0	0	0	0	0	0	0	0	49	0	0	0	0	0	2	19	0	22	0	10	35	0	3	22	0	2	0	0	16	0	0	18	2	1	0	3	GTGCCAGCAGCCGCGGTAATACGAAGGGGGCTAGCGTTGTTCGGAATTACTGGGCGTAAAGCGCACGTAGGCGGATATTTAAGTCAGGGGTGAAATCCCGGGGCTCAACCCCGGAACTGCCTTTGATACTGGGTATCTCGAGTATGGAAGAG
f__Rhodocyclaceae, 4363442	k__Bacteria, p__Proteobacteria, c__Betaproteobacteria, o__Rhodocyclales, f__Rhodocyclaceae, g__, s__	4	0	0	0	0	0	0	0	0	0	0	0	0	0	0	0	0	0	0	0	0	0	0	1	0	1	0	0	0	0	0	0	1	0	0	0	0	1	0	0	0	0	0	0	0	GTGCCAGCAGCCGCGGTAATACGTAGGGTGCGAGCGTTAATCGGAATTACTGGGCGTAAAGCGTGCGCAGGCGGTTATATAAGACAGATGTGAAATCCCCGGGCTCAGCCTGGGAACTGCGTTAGTGACTGTATAGCTAGAGTGCGGCAGA
g__Janthinobacterium, 4365229	k__Bacteria, p__Proteobacteria, c__Betaproteobacteria, o__Burkholderiales, f__Oxalobacteraceae, g__Janthinobacterium, s__	823	0	0	0	0	0	0	0	0	0	0	0	0	0	0	0	0	0	0	0	0	0	0	1	0	0	1	0	279	0	4	0	0	0	536	0	0	1	0	1	0	0	0	0	0	GTGCCAGCAGCCGCGGTAATACGTAGGGTGCAAGCGTTAATCGGAATTACTGGGCGTAAAGCGTGCGCAGGCGGTTTTGTAAGTCTGTCGTGAAATCCCCGGGCTCAACCTGGGAATTGCGATGGAGACTGCAAGGCTAGAGTTTGGCAGAG
g__Zoogloea, 4365792	k__Bacteria, p__Proteobacteria, c__Betaproteobacteria, o__Rhodocyclales, f__Rhodocyclaceae, g__Zoogloea, s__	27	3	0	0	1	0	0	0	0	0	0	0	0	1	0	0	0	4	3	0	1	2	1	1	0	1	1	0	0	0	0	1	3	0	1	0	1	0	0	2	0	0	0	0	0	AGCAGCCGCGGTAATACGTAGGGTGCGAGCGTTAATCGGAATTACTGGGCGTAAAGCGTGCGCAGGCGGTTATGTAAGACGGATGTGAAATCCCCGGGCTCAACCTGGGAACTGCGTTTGTGACTGCATAACTAGAGTACGGCAGAGG
g__Cellvibrio, 4367400	k__Bacteria, p__Proteobacteria, c__Gammaproteobacteria, o__Alteromonadales, f__Alteromonadaceae, g__Cellvibrio, s__	22	0	0	0	0	0	0	0	0	0	0	0	0	0	0	0	0	0	0	0	0	0	0	0	0	0	0	0	0	0	0	0	0	0	9	0	0	0	0	0	13	0	0	0	0	GTGCCAGCAGCCGCGGTAATACGGAGGGTGCAAGCGTTAATCGGAATTACTGGGCGTAAAGCGCACGTAGGTGGTTTGCTAAGTCAGCTGTGAAATCCCCGGGCTCAACCTGGGCACTGCAGTTGAAACTCGCAAGCTAGAGTAGGGTAGA
f__Oxalobacteraceae, 4368881	k__Bacteria, p__Proteobacteria, c__Betaproteobacteria, o__Burkholderiales, f__Oxalobacteraceae, g__, s__	66	0	0	0	0	0	0	0	0	0	0	0	0	0	0	0	0	0	0	0	0	0	0	2	0	0	3	0	1	0	0	0	0	0	6	0	0	0	0	46	0	2	0	6	0	GTGCCAGCAGCCGCGGTAATACGTAGGGTGCAAGCGTTAATCGGAATTACTGGGCGTAAAGCGTGCGCAGGCGGTTGATTAAGTTTGATGTGAAATCCCCGGGCTTAACCTGGGAACTGCATTGAATACTGGTCAGCTAGAGTGTGTCAGA
g__Flavihumibacter, 4370361	k__Bacteria, p__Bacteroidetes, c__[Saprospirae], o__[Saprospirales], f__Chitinophagaceae, g__Flavihumibacter, s__	820	0	0	0	0	0	19	0	0	0	0	0	0	0	1	0	1	797	0	1	0	1	0	0	0	0	0	0	0	0	0	0	0	0	0	0	0	0	0	0	0	0	0	0	0	AGCAGCCGCGGTAATACGGAGGGTGCAAGCGTTATCCGGATTCACTGGGTTTAAAGGGTGCGTAGGCGGGCATGTAAGTCCGTGGTGAAATCTCCGAGCTTAACTCGGAAACTGCCATGGATACTATGTGTCTTGAATGTTGTGGAGGT
c__SJA-4, 4373022	k__Bacteria, p__TM6, c__SJA-4, o__, f__, g__, s__	10	0	0	0	0	0	0	0	0	0	0	0	0	0	0	0	0	0	0	0	0	0	0	0	0	10	0	0	0	0	0	0	0	0	0	0	0	0	0	0	0	0	0	0	0	GTGCCAGCAGCCGCGGTAATACGAAGGGTGCAAACGTTATTCGGATTTATTGGGCGTAAAGGGTACGCAGGCGGTGCGTTAAGTCAACTGTTAAATCTCCCGGCCTAACTGGGAATCAGCGGTAGATACTGGCGCACTAGAGGATGGAAGA
f__Enterobacteriaceae, 4375000	k__Bacteria, p__Proteobacteria, c__Gammaproteobacteria, o__Enterobacteriales, f__Enterobacteriaceae, g__, s__	20	5	1	1	0	1	0	1	0	1	0	0	0	1	0	1	1	0	1	1	4	1	0	0	0	0	0	0	0	0	0	0	0	0	0	0	0	0	0	0	0	0	0	0	0	GCAGCCGCGGTAATACGGAGGGTGCAAGCGTTAATCGGAATTACTGGGCGTAAAGCGCACGCAGGCGGTTTGTTAAGTCAGATGTGAAATCCCCGGGCTCAACCTGGGAACTGCATCTGATACTAGCAAGCTTGAGTCTCGTAGAGG
g__Phenylobacterium, 4375328	k__Bacteria, p__Proteobacteria, c__Alphaproteobacteria, o__Caulobacterales, f__Caulobacteraceae, g__Phenylobacterium, s__	301	0	0	0	0	0	3	0	0	0	0	0	5	0	0	0	0	293	0	0	0	0	0	0	0	0	0	0	0	0	0	0	0	0	0	0	0	0	0	0	0	0	0	0	0	AGCAGCCGCGGTAATACGAAGGGGGCTAGCGTTGCTCGGAATTACTGGGCGTAAAGGGCGCGTAGGCGGACAGTTAAGTCAGAGGTGAAAGCCCAGGGCTCAACCTTGGAATTGCCTTTGAAACTGGCTGTCTTGAGTTCGGGAGAGGT
g__Campylobacter, 4375688	k__Bacteria, p__Proteobacteria, c__Epsilonproteobacteria, o__Campylobacterales, f__Campylobacteraceae, g__Campylobacter, s__	13	0	0	0	0	0	0	0	0	0	0	0	0	0	0	0	0	0	0	0	0	0	0	0	0	0	0	0	0	0	0	0	0	0	0	0	0	0	13	0	0	0	0	0	0	GTGCCAGCAGCCGCGGTAATACGGAGGGTGCAAGCGTTACTCGGAATCACTGGGCGTAAAGGACGCGTAGGCGGATTATCAAGTCTCTTGTGAAATCCTATGGCTTAACCATAGAACTGCTTGGGAAACTGGTAATCTAGAGTGAGGGAGA
c__CK-1C4-19, 4378109	k__Bacteria, p__Tenericutes, c__CK-1C4-19, o__, f__, g__, s__	183	0	0	0	0	0	0	0	0	0	0	0	0	0	0	0	0	0	0	0	0	0	0	0	0	0	0	0	175	0	0	1	0	0	0	0	0	0	0	7	0	0	0	0	0	GTGCCAGCAGCCGCGGTAATACGTAGGTGGCGAGCGTTATCCGGAATTATTGGGCGTAAAGGGCGTGTAGGCGGTACTTTAAGTCTGACGTGAAAGCCAACGGCTCAACCGTTGAAATGCGTTGGAAACTGAAGTACTTGAGTGTCGGAGA
f__Sinobacteraceae, 4379538	k__Bacteria, p__Proteobacteria, c__Gammaproteobacteria, o__Xanthomonadales, f__Sinobacteraceae, g__, s__	2	0	0	0	0	0	0	0	0	0	0	0	0	0	0	0	0	0	0	0	0	0	0	2	0	0	0	0	0	0	0	0	0	0	0	0	0	0	0	0	0	0	0	0	0	GTGCCAGCAGCCGCGGTAATACAGAGGGTGCGAGCGTTAATCGGAATTACTGGGCGTAAAGCGCGCGTAGACGGCTTCGTAAGTCGGATGTGAAATCCCCGGGCTCAACCTGGGAACTGCATTCGAAACTGCATTGCTAGAGTATGGAAGA
o__Rickettsiales, 4380638	k__Bacteria, p__Proteobacteria, c__Alphaproteobacteria, o__Rickettsiales, f__, g__, s__	114	0	0	94	0	20	0	0	0	0	0	0	0	0	0	0	0	0	0	0	0	0	0	0	0	0	0	0	0	0	0	0	0	0	0	0	0	0	0	0	0	0	0	0	0	AGCAGCCGCGGTAATACGAAGGGAGCTAGCGTTGTTCGGAATTACTGGGCGTAAAGGGCGCGTAGGCGGTCTTATAAGTTTGGTGTGAAAGCCCTGGGCTTAACCTAGGAACAGCATTGAATACTGTAAGACTTGAGACCGAGAGAGGG
f__Comamonadaceae, 4381109	k__Bacteria, p__Proteobacteria, c__Betaproteobacteria, o__Burkholderiales, f__Comamonadaceae, g__, s__	37	0	0	0	0	0	0	0	0	0	0	0	0	0	0	0	0	23	2	0	0	0	1	2	0	0	1	0	1	0	1	1	1	0	0	0	0	0	0	3	0	0	0	0	1	AGCAGCCGCGGTAATACGTAGGGTGCGAGCGTTAATCGGAATTACTGGGCGTAAAGCGTGCGCAGGCGGTTATATAAGACAGATGTGAAATCCCCGGGCTCAACCTGGGAACTGCATTTGTGACTGTATAGCTAGAGTACGGTAGAGG
f__Chitinophagaceae, 4382194	k__Bacteria, p__Bacteroidetes, c__[Saprospirae], o__[Saprospirales], f__Chitinophagaceae, g__, s__	17	0	0	0	0	0	0	0	0	0	0	0	0	0	0	0	0	17	0	0	0	0	0	0	0	0	0	0	0	0	0	0	0	0	0	0	0	0	0	0	0	0	0	0	0	GCAGCCGCGGTAATACGGAGGGTGCAAGCGTTATCCGGATTCACTGGGTTTAAAGGGTGCGTAGGCGGGCAGGTAAGTCAGTGGTGAAATCCCCGAGCTTAACTTGGGAACTGCCGTTGATACTATCTGTCTTGAATACTGTGGAGGT
f__Chitinophagaceae, 4382605	k__Bacteria, p__Bacteroidetes, c__[Saprospirae], o__[Saprospirales], f__Chitinophagaceae, g__, s__	2	0	0	0	0	0	0	0	0	0	0	0	0	0	0	0	0	0	0	0	0	0	0	2	0	0	0	0	0	0	0	0	0	0	0	0	0	0	0	0	0	0	0	0	0	GTGCCAGCAGCCGCGGTAATACGGAGGGTGCAAGCGTTATCCGGATTCACTGGGTTTAAAGGGTGCGTAGGTGGGTATGTAAGTCAGTGGTGAAATCCCCGAGCTTAACTTGGGAACTGCCGTTGATACTATATATCTTGAATGTCGTAGA
f__Microbacteriaceae, 4385224	k__Bacteria, p__Actinobacteria, c__Actinobacteria, o__Actinomycetales, f__Microbacteriaceae, g__, s__	126	0	0	0	0	0	6	0	0	0	0	0	0	0	0	0	0	0	0	0	0	0	0	61	0	0	1	0	5	7	0	3	3	0	2	0	0	1	0	36	0	0	1	0	0	CGTGCCAGCAGCCGCGGTAATACGTAGGGCGCAAGCGTTATCCGGAATTATTGGGCGTAAAGAGCTCGTAGGCGGTTTGTCGCGTCTGCTGTGAAATCCCGAGGCTCAACTTCGGGTCTGCAGTGGGTACGGGCAGACTAGAGTGCGGTAGGG
g__Dechloromonas, 4388772	k__Bacteria, p__Proteobacteria, c__Betaproteobacteria, o__Rhodocyclales, f__Rhodocyclaceae, g__Dechloromonas, s__	284	0	0	0	0	0	182	0	0	0	0	0	2	0	0	0	0	84	0	0	0	0	0	4	0	0	0	0	0	0	0	5	7	0	0	0	0	0	0	0	0	0	0	0	0	AGCAGCCGCGGTAATACGTAGGGTGCGAGCGTTAATCGGAATTACTGGGCGTAAAGCGTGCGCAGGCGGTTTCGTAAGACAGAGGTGAAATCCCCGGGCTCAACCTGGGAACTGCCTTTGTGACTGCGAAGCTAGAGTACGGCAGAGGG
f__Comamonadaceae, 4391034	k__Bacteria, p__Proteobacteria, c__Betaproteobacteria, o__Burkholderiales, f__Comamonadaceae, g__, s__	7	0	0	0	0	0	2	0	0	0	0	0	0	0	0	0	0	0	0	0	0	0	0	0	0	0	0	0	1	0	0	0	0	0	3	0	0	0	0	1	0	0	0	0	0	AGCAGCCGCGGTAATACGTAGGGTGCAAGCGTTAATCGGAATTACTGGGCGTAAAGCGTGCGCAGGCGGTTATGCAAGACAGAGGTGAAATCCCCGGGCTCAACCTGGGAACTGCCTTTGTGACTGCATAGCTAGAGTACGGCAGAGGGGG
f__Enterobacteriaceae, 4392183	k__Bacteria, p__Proteobacteria, c__Gammaproteobacteria, o__Enterobacteriales, f__Enterobacteriaceae, g__, s__	30	5	3	4	4	0	0	1	0	1	1	0	0	1	0	1	2	0	4	1	0	2	0	0	0	0	0	0	0	0	0	0	0	0	0	0	0	0	0	0	0	0	0	0	0	GCAGCCGCGGTAATACGGAGGGTGCAAGCGTTAATCGGAATTACTGGGCGTAAAGCGCACGCAGGCGGTTTGTTAAGTCAGATGTGAAATCCCCGGGCTCAACCTGGGGACTGCATCTGATACCTGGCAAGCTTGAGTCTCGTACAGG
s__succinicans, 4393400	k__Bacteria, p__Bacteroidetes, c__Flavobacteriia, o__Flavobacteriales, f__Flavobacteriaceae, g__Flavobacterium, s__succinicans	3	0	0	0	0	0	0	0	0	0	0	0	0	0	0	0	0	0	0	0	0	0	0	3	0	0	0	0	0	0	0	0	0	0	0	0	0	0	0	0	0	0	0	0	0	GTGCCAGCAGCCGCGGTAATACGGAGGATCCAAGCGTTATCCGGAATCATTGGGTTTAAAGGGTCCGTAGGCGGTCTTGTAAGTCAGTGGTGAAAGCCCATCGCTCAACGGTGGAACGGCCATTGATACTGCAGGACTTGAATTACTGGGA
f__Pirellulaceae, 4394168	k__Bacteria, p__Planctomycetes, c__Planctomycetia, o__Pirellulales, f__Pirellulaceae, g__, s__	2	0	0	0	0	0	0	0	0	0	0	0	0	0	0	0	0	0	0	0	0	0	0	0	0	0	0	0	0	0	0	0	0	0	0	0	0	0	0	0	0	1	1	0	0	GTGCCAGCAGCCGCGGTAAGACGAACCGTACGAACGTTATTCGGAATCACTGGGCTTAAAGGGTGCGTAGGCGGCGCGGAAAGTTGGGTGTGAAATCCCTCGGCTCAACCGAGGAACTGCGCCCAAAACTACCGTGCTTGAGGGAGACAGA
f__Comamonadaceae, 4394695	k__Bacteria, p__Proteobacteria, c__Betaproteobacteria, o__Burkholderiales, f__Comamonadaceae, g__, s__	4	0	0	0	0	0	0	0	0	0	0	0	0	0	0	0	0	2	0	0	0	0	0	2	0	0	0	0	0	0	0	0	0	0	0	0	0	0	0	0	0	0	0	0	0	GTGCCAGCAGCCGCGGTAATACGTAGGGTGCAAGCGTTAATCGGAATTACTGGGCGTAAAGCGTGCGCAGGCGGTCATGTAAGACAGATGTGAAATCCCCGGGCTCAACCTGGGAACTGCATTTGTGACTGCATGGCTTGAGTGCGGCAGAGG
g__Gemmata, 4395041	k__Bacteria, p__Planctomycetes, c__Planctomycetia, o__Gemmatales, f__Gemmataceae, g__Gemmata, s__	3	0	0	0	0	0	0	0	0	0	0	0	3	0	0	0	0	0	0	0	0	0	0	0	0	0	0	0	0	0	0	0	0	0	0	0	0	0	0	0	0	0	0	0	0	GCAGCCGCGGTAAGACGAACCGTGCGAACGTTGTTCGGAATCACTGGGCTTAAAGGGCGCGTAGGCGGGCTGTCAAGTCTGGGGTGAAATCCCGCGGCTCAACCGTGGAACTGCCTCAGATACTGACGGCCTCGAGGGAGGTAGGGG
c__SJA-4, 4396488	k__Bacteria, p__TM6, c__SJA-4, o__, f__, g__, s__	17	0	0	0	0	0	0	0	0	0	0	0	0	0	0	0	0	0	0	0	0	0	0	0	0	0	10	0	0	2	2	0	0	0	0	0	3	0	0	0	0	0	0	0	0	GTGCCAGCAGCCGCGGTAATACGAGGGGTGCAAGCGTTATTCGGATTAATTGGGCGTAAAGGGTGCGCAGACGGCTTGTTAAGTCACTTGTTAAATTCTTCGGCCTAACTGAAGGTGTGCAAGTGATACTGGCGAACTAGAGGGTGGAAGA
f__Pirellulaceae, 4403421	k__Bacteria, p__Planctomycetes, c__Planctomycetia, o__Pirellulales, f__Pirellulaceae, g__, s__	3	0	0	0	0	0	3	0	0	0	0	0	0	0	0	0	0	0	0	0	0	0	0	0	0	0	0	0	0	0	0	0	0	0	0	0	0	0	0	0	0	0	0	0	0	AGCAGCCGCGGTAAGACGAACCGTACAAACGTTATTCGGAATCACTGGGCTTAAAGGGTGCGTAGGCGGCGCGGAAAGTTGGGTGTGAAATCCCTCGGCTCAACCGAGGAACTGCGCCCAAAACTACCGTGCTTGAGGGAGATAGAGG
f__Enterobacteriaceae, 4407939	k__Bacteria, p__Proteobacteria, c__Gammaproteobacteria, o__Enterobacteriales, f__Enterobacteriaceae, g__, s__	11	1	1	0	0	0	0	1	0	1	0	0	0	1	0	3	0	0	2	0	0	0	1	0	0	0	0	0	0	0	0	0	0	0	0	0	0	0	0	0	0	0	0	0	0	GCAGCCGCGGTAATACGGAGGGTGCAAGCGTTAATCGGAATTACTGGGCGTAAAGCGCACGCAGGCGGTTTGTTAAGTCAGATGTGAAATCCCCGGGCTTAACCTGGGAACTGCATTTGAAACTGGCAAGCTTGAGTCTCGTAGAGGG
g__Zoogloea, 4408378	k__Bacteria, p__Proteobacteria, c__Betaproteobacteria, o__Rhodocyclales, f__Rhodocyclaceae, g__Zoogloea, s__	2	0	0	0	0	0	2	0	0	0	0	0	0	0	0	0	0	0	0	0	0	0	0	0	0	0	0	0	0	0	0	0	0	0	0	0	0	0	0	0	0	0	0	0	0	GCAGCCGCGGTAATACGTAGGGTGCGAGCGTTAATCGGAATTACTGGGCGTAAAGCGTGCGCAGGCGGTTATGTAAGACAGAGGTGAAATCCCCGGGCTCAACCTGGGAACTGCCTTTGTGACTGCATAGCTGGAGTGCGGCAGAGG
g__Rhizobium, 4409759	k__Bacteria, p__Proteobacteria, c__Alphaproteobacteria, o__Rhizobiales, f__Rhizobiaceae, g__Rhizobium, s__	4	0	0	0	0	0	0	0	0	0	0	0	0	0	0	0	0	4	0	0	0	0	0	0	0	0	0	0	0	0	0	0	0	0	0	0	0	0	0	0	0	0	0	0	0	GCAGCCGCGGTAATACGAAGGGGGCTAGCGTTGTTCGGATTTACTGGGCGTAAAGTGCACGTAGGCGGATCGATCAGTCAGGGGTGAAATCCCAGAGCTCAACTCTGGAACTGCCTTTGATACTGTCGATCTGGAGTATGGAAGAGG
o__RB41, 4413396	k__Bacteria, p__Acidobacteria, c__[Chloracidobacteria], o__RB41, f__, g__, s__	2	0	0	0	0	0	0	0	0	0	0	0	0	0	0	0	0	0	0	0	0	0	0	2	0	0	0	0	0	0	0	0	0	0	0	0	0	0	0	0	0	0	0	0	0	GTGCCAGCAGCCGCGGTAATACGGAGGGGGCAAGCGTTGTTCGGATTTACTGGGCGTAAAGGGCGCGTAGGCGGCGTGACAAGTCACTTGTGAAATCTCCGGGCTTAACTCGGAACTGCCAAGTGATACTGTCGTGCTAGAGTGCAGAAGG
f__Alcaligenaceae, 4415319	k__Bacteria, p__Proteobacteria, c__Betaproteobacteria, o__Burkholderiales, f__Alcaligenaceae, g__, s__	12	0	0	0	0	0	12	0	0	0	0	0	0	0	0	0	0	0	0	0	0	0	0	0	0	0	0	0	0	0	0	0	0	0	0	0	0	0	0	0	0	0	0	0	0	GCAGCCGCGGTAATACGTAGGGTGCGAGCGTTAATCGGAATTACTGGGCGTAAAGCGTGCGCAGGCGGTTCGGAAAGAAAGATGTGAAATCCCAGAGCTTAACTTTGGAACTGCATTTTTAACTACCGGGCTAGAGTGTGTCAGAGG
c__TM7-3, 4417526	k__Bacteria, p__TM7, c__TM7-3, o__, f__, g__, s__	2	0	0	0	0	0	0	0	0	0	0	0	0	0	0	0	0	0	0	0	0	0	2	0	0	0	0	0	0	0	0	0	0	0	0	0	0	0	0	0	0	0	0	0	0	GCAGCCGCGGTCATACGTAGGATCCGAGCGTTATCCGGAGTGACTGGGCGTAAAGAGTTGCGTAGGTGGTTAGTAAAGCGAATAGTGAAATCTGGCGGCTCAACCGTACAGGCTATTATTCGAACTCACTAACTCGAGAGTGGTAGA
f__Rhodocyclaceae, 4418677	k__Bacteria, p__Proteobacteria, c__Betaproteobacteria, o__Rhodocyclales, f__Rhodocyclaceae, g__, s__	4	0	0	0	0	0	0	0	0	0	0	0	0	0	0	0	0	0	0	0	0	0	0	3	0	0	0	0	0	0	0	0	0	0	0	0	0	0	0	1	0	0	0	0	0	GTGCCAGCAGCCGCGGTAATACGTAGGGTGCGAGCGTTAATCGGAATTACTGGGCGTAAAGCGTGCGCAGGCGGTTATGCAAGACAGATGTGAAATCCCCGGGCTCAACCTGGGAACTGCATTTGTGACTGCATAGCTAGAGTACGGTAGAG
s__dispar, 4422456	k__Bacteria, p__Firmicutes, c__Clostridia, o__Clostridiales, f__Veillonellaceae, g__Veillonella, s__dispar	41	0	0	0	0	0	0	0	0	0	0	0	0	0	0	0	0	0	0	0	0	0	0	0	0	0	0	0	0	0	0	0	0	0	0	20	7	13	0	0	0	0	0	1	0	GTGCCAGCAGCCGCGGTAATACGTAGGTGGCAAGCGTTGTCCGGAATTATTGGGCGTAAAGCGCGCGCAGGCGGATCAGTCAGTCTGTCTTAAAAGTTCGGGGCTTAACCCCGTGAGGGGATGGAAACTGCTGATCTAGAGTATCGGAGAG
g__Corynebacterium, 4422519	k__Bacteria, p__Actinobacteria, c__Actinobacteria, o__Actinomycetales, f__Corynebacteriaceae, g__Corynebacterium, s__	618	0	0	0	0	0	0	0	0	0	0	0	0	0	0	0	0	0	0	0	0	0	0	0	0	0	616	1	0	0	0	0	0	0	0	0	0	1	0	0	0	0	0	0	0	GTGCCAGCAGCCGCGGTAATACGTAGGGTGCGAGCGTTGTCCGGATTTACTGGGCGTAAAGAGCTCGTAGGTGGCTTGTCGCGTCGTCTGTGAAAGTCTGGGGCTTAACTCCGGGTGTGCAGGCGATACGGGCTGGCTTGAGTGCTGTAGGG
f__Comamonadaceae, 4424705	k__Bacteria, p__Proteobacteria, c__Betaproteobacteria, o__Burkholderiales, f__Comamonadaceae, g__, s__	2	0	0	0	0	0	0	0	1	0	0	0	0	0	0	0	0	0	0	0	0	0	1	0	0	0	0	0	0	0	0	0	0	0	0	0	0	0	0	0	0	0	0	0	0	GCAGCCGCGGTAATACGTAGGGTGCGAGCGTTAATCGGAATTACTGGGCGTAAAGCGTGCGCAGGCGGTTATGTAAGTCAGATGTGAAATCCCCGGGCTCAACCTGGGAACTGCATTTGAGACTGCATAGCTAGAGTACGGCAGAGG
g__Hylemonella, 4425152	k__Bacteria, p__Proteobacteria, c__Betaproteobacteria, o__Burkholderiales, f__Comamonadaceae, g__Hylemonella, s__	88	0	0	0	0	0	0	0	0	0	0	0	0	0	0	0	0	88	0	0	0	0	0	0	0	0	0	0	0	0	0	0	0	0	0	0	0	0	0	0	0	0	0	0	0	AGCAGCCGCGGTAATACGTAGGGTGCGAGCGTTAATCGGAATTACTGGGCGTAAAGCGTGCGCAGGCGGTGATGTAAGACAGTTGTGAAATCCCCGGGCTCAACCTGGGAACTGCATCTGTGACTGCATTGCTGGAGTGCGGCAGAGGG
f__Xanthobacteraceae, 4425688	k__Bacteria, p__Proteobacteria, c__Alphaproteobacteria, o__Rhizobiales, f__Xanthobacteraceae, g__, s__	24	0	0	0	0	0	0	0	0	0	0	0	0	0	0	0	0	24	0	0	0	0	0	0	0	0	0	0	0	0	0	0	0	0	0	0	0	0	0	0	0	0	0	0	0	AGCAGCCGCGGTAATACGAAGGGGGCTAGCGTTGCTCGGAATCACTGGGCGTAAAGCGCACGTAGGCGGATCGTTAAGTCAGGGGTGAAATCCTGGAGCTCAACTCCAGAACTGCCCTTGATACTGGCGATCTCGAGTTCGAGAGAGGT
f__Oxalobacteraceae, 4426329	k__Bacteria, p__Proteobacteria, c__Betaproteobacteria, o__Burkholderiales, f__Oxalobacteraceae, g__, s__	84	0	0	0	0	0	0	0	0	0	0	0	0	0	0	0	0	0	0	0	0	0	0	5	0	20	0	0	3	5	0	11	8	0	0	0	0	13	18	0	0	0	0	0	1	GTGCCAGCAGCCGCGGTAATACGTAAGGTGCAAGCGTTAATCGGAATTACTGGGCGTAAAGCGTGCGCAGGCGGTTATATAAGACAGTCGTGAAATCCCCGGGCTCAACCTGGGAACTGCGATTGTGACTGTATGGCTAGAGTGTGTCAGAA
g__Lautropia, 4426982	k__Bacteria, p__Proteobacteria, c__Betaproteobacteria, o__Burkholderiales, f__Burkholderiaceae, g__Lautropia, s__	6	0	0	0	0	0	0	0	0	0	0	0	0	0	0	0	0	0	0	0	0	0	0	0	0	0	2	0	0	0	0	0	1	0	0	0	0	3	0	0	0	0	0	0	0	GTGTCAGCAGCCGCGGTAATACGTAGGGTGCAAGCGTTAATCGGAATTACTGGGCGTAAAGAGTGCGCAGGCGGTTTTGCAAGACCGATGTGAAATCCCCGGGCTTAACCTGGGAACTGCATTGGTGACTGCAAGGCTAGAGTGTGTCAGA
g__Zoogloea, 4427397	k__Bacteria, p__Proteobacteria, c__Betaproteobacteria, o__Rhodocyclales, f__Rhodocyclaceae, g__Zoogloea, s__	26	0	0	0	0	0	25	0	0	0	0	0	0	0	0	0	0	1	0	0	0	0	0	0	0	0	0	0	0	0	0	0	0	0	0	0	0	0	0	0	0	0	0	0	0	AGCAGCCGCGGTAATACGTAGGGTGCGAGCGTTAATCGGAATTACTGGGCGTAAAGCGTGCGCAGGCGGTTATGTAAGACAGATGTGAAATCCCCGGGCTCAACCTGGGAACTGCATTTGTGACTGCATGGCTAGAGTGCGTCAGAGGG
g__Stenotrophomonas, 4430952	k__Bacteria, p__Proteobacteria, c__Gammaproteobacteria, o__Xanthomonadales, f__Xanthomonadaceae, g__Stenotrophomonas, s__	69	0	0	0	0	0	0	0	0	0	0	0	0	0	0	0	0	0	0	0	0	0	0	4	0	6	7	0	0	23	0	21	7	0	0	0	0	0	0	0	0	0	0	0	1	GTGCCAGCAGCCGCGGTAATACGAAGGGTGCAAGCGTTACTCGGAATTACTGGGCGTAAAGCGTGCGTAGGTGGTCGTTTAAGTCCGTTGTGAAAGCCCTGGGCTCAACCTGGGAACTGCAGTGGATACTGGGCGACTAGAATGTGGTAGA
f__Neisseriaceae, 4432907	k__Bacteria, p__Proteobacteria, c__Betaproteobacteria, o__Neisseriales, f__Neisseriaceae, g__, s__	632	0	0	0	0	0	4	0	0	0	0	0	0	0	0	0	0	4	0	0	0	0	0	4	0	0	1	0	29	0	0	0	0	0	347	0	0	1	0	230	0	0	2	10	0	GTGCCAGCAGCCGCGGTAATACGTAGGGTCCAAGCGTTAATCGGAATTACTGGGCGTAAAGGGTGCGCAGGTGGTTACGTAAGTCTGATGTGAAATCCCCGGGCTCAACCTGGGAACTGCATTGGAGACTGTGTGACTAGAGTGTGGCAGAG
g__Pedomicrobium, 4435098	k__Bacteria, p__Proteobacteria, c__Alphaproteobacteria, o__Rhizobiales, f__Hyphomicrobiaceae, g__Pedomicrobium, s__	16	0	0	0	0	0	0	0	0	0	0	0	0	0	0	0	0	0	0	0	0	14	0	2	0	0	0	0	0	0	0	0	0	0	0	0	0	0	0	0	0	0	0	0	0	AGCAGCCGCGGTAATACGAAGGGAGCTAGCGTTGTTCGGAATCACTGGGCGTAAAGCGCACGTAGGCGGATGTGTCAGTCAGGGGTGAAATCCCGGAGCTCAACTTCGGAACTGCCCTTGATACAGCACGTCTTGAGTCCGATAGAGG
f__Comamonadaceae, 4435455	k__Bacteria, p__Proteobacteria, c__Betaproteobacteria, o__Burkholderiales, f__Comamonadaceae, g__, s__	592	0	0	0	0	0	31	0	0	0	0	0	0	0	0	0	0	1	0	0	0	0	0	17	0	12	4	0	79	17	0	18	8	4	343	0	0	4	0	45	0	0	0	7	2	GTGCCAGCAGCCGCGGTAATACGTAGGGTGCAAGCGTTAATCGGAATTACTGGGCGTAAAGCGTGCGCAGGCGGTTATGCAAGACAGAGGTGAAATCCCCGGGCTCAACCTGGGAACTGCCTTTGTGACTGCATAGCTAGAGTGTGTCAGAG
f__Verrucomicrobiaceae, 4441385	k__Bacteria, p__Verrucomicrobia, c__Verrucomicrobiae, o__Verrucomicrobiales, f__Verrucomicrobiaceae, g__, s__	2	0	0	0	0	0	2	0	0	0	0	0	0	0	0	0	0	0	0	0	0	0	0	0	0	0	0	0	0	0	0	0	0	0	0	0	0	0	0	0	0	0	0	0	0	GCAGCCGCGGTAATACAGAGGTCTCAAGCGTTGTTCGGAATCACTGGGCGTAAAGGGTGCGTAGGTGGCGTGGTAAGTCAGATGTGAAAGCCCGGGGCTCAACCTCGGAATTGCATCCGATACTACCATGCTAGAGAACTGGAGAGG
g__Perlucidibaca, 4443429	k__Bacteria, p__Proteobacteria, c__Gammaproteobacteria, o__Pseudomonadales, f__Moraxellaceae, g__Perlucidibaca, s__	4	0	0	0	0	0	0	0	0	0	0	0	0	0	0	0	0	0	0	0	0	0	0	1	0	0	0	0	3	0	0	0	0	0	0	0	0	0	0	0	0	0	0	0	0	GTGCCAGCAGCCGCGGTAATACAGAGGGTGCAAGCGTTAATCGGAATTACTGGGCGTAAAGCGCGCGTAGGCGGTTACGTAAGTTGGAGGTGAAATCCCCGAGCTCAACTTGGGAATTGCCTTCAAAACTGCGTGGCTAGAGTGTGGGAGA
g__Acinetobacter, 4449013	k__Bacteria, p__Proteobacteria, c__Gammaproteobacteria, o__Pseudomonadales, f__Moraxellaceae, g__Acinetobacter, s__	6	0	0	0	0	0	0	0	0	0	0	0	0	0	0	0	0	0	0	0	0	0	0	0	0	0	0	0	1	0	0	0	1	0	3	0	0	0	1	0	0	0	0	0	0	GTGCCAGCAGCAGCGGTAATACAGAGGGTGCAAGTGTTAATCGGAATTACTGGGCGTAAAGCGCACGCAGGCGGTTGGATAAGTTAGATGTGAAAGCCCCGGGCTCAACCTGGGAATTGCATTTAAAACTGTCCAGCTAGAGTCTTGTAGA
f__Pseudoalteromonadaceae, 4451971	k__Bacteria, p__Proteobacteria, c__Gammaproteobacteria, o__Vibrionales, f__Pseudoalteromonadaceae, g__, s__	1527	0	0	0	0	0	0	0	0	0	0	0	0	0	0	0	0	0	38	0	0	0	0	801	1	2	27	0	61	2	2	47	50	20	357	14	0	0	21	63	13	1	1	1	5	GTGCCAGCAGCCGCGGTAATACGGAGGGTGCGAGCGTTAATCGGAATTACTGGGCGTAAAGCGCATGCAGGTGGTTTGTTAAGTCAGATGTGAAAGCCCTGGGCTCAACCTAGGAGTTGCATTTGAGACTGACAAGCTAGAGTACTGTAGAG
f__Enterobacteriaceae, 4454257	k__Bacteria, p__Proteobacteria, c__Gammaproteobacteria, o__Enterobacteriales, f__Enterobacteriaceae, g__, s__	2	0	0	0	0	0	0	0	0	0	0	0	0	0	0	0	0	0	0	0	0	0	0	0	0	0	0	0	0	0	0	0	0	0	0	0	0	0	0	0	0	2	0	0	0	GTGCCAGCAGCCGCGGTAATACGGAGGGTGCAAGCGTTAATCGGAATTACTGGGCGTAAAGCGCACGCAGGCGGTCTGTCAAGTCGGATGTGAAATCCCCGGGCTCAACCTGGGAACTGCATTCGAAACTGACAGGCTAGAGTCTTGTAGA
f__Sphingomonadaceae, 4457555	k__Bacteria, p__Proteobacteria, c__Alphaproteobacteria, o__Sphingomonadales, f__Sphingomonadaceae, g__, s__	20	0	0	0	0	0	0	0	0	0	0	0	0	0	0	0	0	0	0	0	0	0	0	0	0	0	0	0	15	0	0	0	0	0	5	0	0	0	0	0	0	0	0	0	0	GTGCCAGCAGCCGCGGTAATACGGAGGGAGCTAGCGTTGTTCGGAATTACTGGGCGTAAAGCGCACGTAGGCGGCGACTCAAGTCAGAGGTGAAAGCCCGGGGCTCAACCCCGGAACTGCCTTTGAAACTAGGTTGCTAGAATCCTGGAGA
g__Dermacoccus, 4458619	k__Bacteria, p__Actinobacteria, c__Actinobacteria, o__Actinomycetales, f__Dermacoccaceae, g__Dermacoccus, s__	22	0	0	0	0	0	0	0	0	0	0	0	0	0	0	0	0	0	0	0	0	0	0	0	0	0	21	0	0	0	0	0	0	0	0	0	0	0	0	0	0	0	1	0	0	GTGCCAGCAGCCGCGGTAATACGTAGGGTGCGAGCGTTGTCCGGAATTATTGGGCGTAAAGAGCTTGTAGGCGGTTTGTCGCGTCTGCTGTGAAAGACCGGGGCTTAACTCCGGTTCTGCAGTGGGTACGGGCAGACTAGAGTATGGTAGG
g__Mycobacterium, 4459446	k__Bacteria, p__Actinobacteria, c__Actinobacteria, o__Actinomycetales, f__Mycobacteriaceae, g__Mycobacterium, s__	23	0	0	0	0	0	0	0	0	0	0	0	0	0	0	0	0	0	0	0	0	0	0	4	0	0	0	0	0	0	0	0	0	0	0	0	0	0	0	0	19	0	0	0	0	GTGCCAGCAGCCGCGGTAATACGTAGGGTGCGAGCGTTGTCCGGAATTACTGGGCGTAAAGAGCTCGTAGGTGGTTTGTCACGTTGTTCGTGAAAACTCACAACTCAATTGTGGGCGTGCGGGCGATACGGGCAGACTTGAGTACTGCAGGG
g__Pseudomonas, 4461938	k__Bacteria, p__Proteobacteria, c__Gammaproteobacteria, o__Pseudomonadales, f__Pseudomonadaceae, g__Pseudomonas, s__	25	0	0	0	0	0	0	0	0	0	0	0	0	0	0	0	0	0	0	0	0	0	0	0	1	0	3	1	0	5	0	6	1	1	0	2	1	1	1	0	0	0	0	0	2	GTGCCAGCAGCCGCGGTAATACAGAGGGTGCAAGCGTTAATCGGAATTACTGGGCGTAAAGCGCGCGTAGGTGGTTCGTTAAGTTGGATGTAAAGCCCCGGGCTCAACCTGGGAACTGCATTCAAAACTGTCGAGCTAGAGTATGGTAGA
f__Sphingomonadaceae, 4467678	k__Bacteria, p__Proteobacteria, c__Alphaproteobacteria, o__Sphingomonadales, f__Sphingomonadaceae, g__, s__	16	0	0	0	0	0	0	0	0	0	0	0	0	0	0	0	0	0	0	0	0	0	0	12	0	0	0	0	0	0	0	0	0	0	4	0	0	0	0	0	0	0	0	0	0	GTGCCAGCAGCCGCGGTAATACGGAGGGAGCTAGCGTTGTTCGGAATTACTGGGCGTAAAGCGCACGTAGGCGGCTATTCAAGTCAGGGGTGAAAGCCCGGGGCTCAACCCCGGAACTGCCTTTGAAACTAGATAGCTTGAATCTTGGAGA
f__Comamonadaceae, 4468812	k__Bacteria, p__Proteobacteria, c__Betaproteobacteria, o__Burkholderiales, f__Comamonadaceae, g__, s__	30	0	0	0	0	0	0	0	0	0	0	0	0	0	0	0	0	0	0	0	0	0	0	0	0	0	0	0	0	0	0	0	0	0	11	0	18	0	0	0	0	1	0	0	0	GTGCCAGCAGCCGCGGTAATACGTAGGGTGCAAGCGTTAATCGGAATTACTGGGCGTAAAGCGTGCGCAGGCGGCTTTGCAAGACAGATGTGAAATCCCCGGGCTCAACCTGGGAACTGCATTTGTGACTGCAAGGCTAGAGTACGGCAGAG
f__Chitinophagaceae, 4475718	k__Bacteria, p__Bacteroidetes, c__[Saprospirae], o__[Saprospirales], f__Chitinophagaceae, g__, s__	2794	1	1	1	0	1	1190	26	32	0	0	41	11	0	0	0	0	5	0	2	0	0	0	81	82	89	139	76	100	129	16	228	154	107	7	106	27	43	54	15	0	0	0	1	29	GTGCCAGCAGCCGCGGTAATACGGAGGGTGCAAGCGTTATCCGGATTCACTGGGTTTAAAGGGTGTGTAGGCGGGCATTTAAGTCAGTGGTGGAATCTCCGAGCTCAACTCGGAAACTGCCATTGATACTATTTGTCTTGAATATCGTTGAG
g__Stenotrophomonas, 4477028	k__Bacteria, p__Proteobacteria, c__Gammaproteobacteria, o__Xanthomonadales, f__Xanthomonadaceae, g__Stenotrophomonas, s__	3	1	0	0	0	0	0	0	0	0	0	0	0	1	0	0	0	0	0	0	0	1	0	0	0	0	0	0	0	0	0	0	0	0	0	0	0	0	0	0	0	0	0	0	0	GCAGCCGCGGTAATACGAAGGGTGCAAGCGTTACTCGGAATTACTGGGCGTAAAGCGTGCGTAGGTGGTCGTTTAAGTCCGTTGCGAAAGCCCTGGGCTCAACCTGGGAACTGCAGTGGATACTGGGCGACTAGAGTGTGGTAGAGG
f__Sinobacteraceae, 4478803	k__Bacteria, p__Proteobacteria, c__Gammaproteobacteria, o__Xanthomonadales, f__Sinobacteraceae, g__, s__	10	0	0	0	0	0	0	0	0	0	0	0	10	0	0	0	0	0	0	0	0	0	0	0	0	0	0	0	0	0	0	0	0	0	0	0	0	0	0	0	0	0	0	0	0	GCAGCCGCGGTAATACAGAGGGTGCAAGCGTTAATCGGATTTACTGGGCGTAAAGCGTGCGTAGGTGGTTTTGTAAGTCGGATGTGAAAGCCCCGGGCTCAACCTGGGAACTGCATTCGATACTGCGAGACTCGAGTTTGGTAGAGG
f__Enterobacteriaceae, 4479405	k__Bacteria, p__Proteobacteria, c__Gammaproteobacteria, o__Enterobacteriales, f__Enterobacteriaceae, g__, s__	82	10	2	5	3	6	0	4	1	6	1	0	0	8	4	1	7	1	10	2	3	2	6	0	0	0	0	0	0	0	0	0	0	0	0	0	0	0	0	0	0	0	0	0	0	AGCAGCCGCGGTAATACGGAGGGTGCAAGCGTTAATCGGAATTACTGGGCGTAAAGCGCACGCAGGCGGTTTGTTAAGTCAGATGTGAAATCCCCGGGCTCAACCTGGGAACTGCATCTGATACTGGCAAGCTTGAGTCTCGTAAAGG
g__Halorubrum, 182928	k__Archaea, p__Euryarchaeota, c__Halobacteria, o__Halobacteriales, f__Halobacteriaceae, g__Halorubrum, s__	4	0	0	0	0	0	0	0	0	0	0	4	0	0	0	0	0	0	0	0	0	0	0	0	0	0	0	0	0	0	0	0	0	0	0	0	0	0	0	0	0	0	0	0	0	GCCGCCGCGGTAATACCGGCAGCCCAAGTGATGGCCGATCTTATTGGGCCTAAAGCGTCCGTAGCTGGCCGCACAAGTCCATCGGGAAATCCACCTGCCCAACAGGTGGACGCCCGGTGGAAACTGTGTGGCTTGGGACCGGAAGG
g__Halorubrum, 788081	k__Archaea, p__Euryarchaeota, c__Halobacteria, o__Halobacteriales, f__Halobacteriaceae, g__Halorubrum, s__	31	0	0	0	0	31	0	0	0	0	0	0	0	0	0	0	0	0	0	0	0	0	0	0	0	0	0	0	0	0	0	0	0	0	0	0	0	0	0	0	0	0	0	0	0	GCCGCCGCGGTAATACCGGCAGCCCAAGTGATGGCCGATCTTATTGGGCCTAAAGCGTCCGTAGCTGGCCGCACAAGTCCATCGGGAAATCCACCTGCTCAACAGGTGGGCGTCCGGTGGAAACTGTGTGGCTTGGGACCGGAAGG
f__Halobacteriaceae, 652998	k__Archaea, p__Euryarchaeota, c__Halobacteria, o__Halobacteriales, f__Halobacteriaceae, g__, s__	3	0	0	0	0	0	0	0	0	0	0	0	0	0	0	0	0	0	0	0	0	0	0	0	0	0	0	0	0	0	0	0	0	3	0	0	0	0	0	0	0	0	0	0	0	GTGCCAGCCGCCGCGGTAACACCGGCAGCTCGAGTGATGGCCGATTTTATTGGGCCTAAAGCGTCCGTAGCCTGCCGTACGGGTCCGTCGGGAAATCCGCCCGCTCAACGGGCGGACGTCCGGCGGAAACCATACGGCTTGGGACCAGAGG
f__[Cerasicoccaceae], FS10000387:3:BNT40308-2320:1:1101:13360:1440 1:N:0:5	k__Bacteria, p__Verrucomicrobia, c__Opitutae, o__[Cerasicoccales], f__[Cerasicoccaceae], g__, s__	6646	0	0	0	0	0	0	2	0	0	0	0	1	0	0	0	0	0	0	0	0	0	0	151	206	627	587	362	473	708	63	1012	843	293	161	252	80	212	404	8	29	19	2	3	148	GTGTCAGCAGCCGCGGTAATACAGAGACTGCAAGCGTTACTCGGATTCACTGGGCGTAAAGGGAGCGCAGGCGGACCGGTGTGTCAGATGTGAAACCCCAGGGCTCAACCTTGGGACTGCGTCTGAAACTGCCGGTCTAGGGACTCGGAGG
g__Spirosoma, FS10000387:4:BNT40308-1625:1:1101:4940:1040 1:N:0:6	k__Bacteria, p__Bacteroidetes, c__Cytophagia, o__Cytophagales, f__Cytophagaceae, g__Spirosoma, s__	1977	1	0	0	0	0	1861	1	15	0	0	1	86	1	0	0	0	9	0	1	0	1	0	0	0	0	0	0	0	0	0	0	0	0	0	0	0	0	0	0	0	0	0	0	0	GCAGCCGCGGTAATACGGAGGGTGCAAGCGTTGTCCGGATTTATTGGGTTTAAAGGGTGCGTAGGTGGTTTAGTAAGTCTGGTTTGAAAGTCAGCCGCTTAACGGTTGAGGGTGGCTGGATACTGCTGAACTTGAATTTTTCGGAGG
c__VC2_1_Bac22, FS10000387:4:BNT40308-1625:1:1101:1190:2000 1:N:0:2	k__Bacteria, p__Bacteroidetes, c__VC2_1_Bac22, o__, f__, g__, s__	1266	0	57	1	1	7	1165	1	0	0	1	0	31	0	0	0	1	0	0	0	0	1	0	0	0	0	0	0	0	0	0	0	0	0	0	0	0	0	0	0	0	0	0	0	0	GCAGCCGCGGTAATACGGAGGATGCAAGCGTTATCCGGATTCATTGGGTTTAAAGGGTGCGTAGGCGGGTCAATAAGTCAGGGGTGAAATCCGGCAGCTCAACTGTCGAACTGCCTCTGATACTGTTGGTCTTGAATTGGGTTGAGG
g__Dyadobacter, FS10000387:3:BNT40308-2320:1:1101:7510:1080 1:N:0:5	k__Bacteria, p__Bacteroidetes, c__Cytophagia, o__Cytophagales, f__Cytophagaceae, g__Dyadobacter, s__	648	0	0	0	0	0	0	0	0	0	0	0	0	0	0	0	0	0	0	0	0	0	0	309	0	54	24	37	13	0	0	31	32	13	1	36	8	7	0	29	39	0	0	0	15	GTGTCAGCAGCCGCGGTAATACGGAGGGTGCGAGCGTTGTCCGGATTTATTGGGTTTAAAGGGTGCGTAGGTGGCTTTTTAAGTCAGTGGTGAAATACGGTTGCTCAACAATCGAGGTGCCATTGATACTGAAAAGCTTGAAATAATTGGA
o__Rickettsiales, FS10000387:3:BNT40308-2320:1:1101:1300:3130 1:N:0:5	k__Bacteria, p__Proteobacteria, c__Alphaproteobacteria, o__Rickettsiales, f__, g__, s__	343	0	0	0	0	0	0	0	0	0	0	0	0	0	0	0	0	0	0	0	0	0	0	18	6	19	32	34	10	34	9	70	37	20	0	11	4	17	6	0	9	0	0	2	5	GTGTCAGCCGCCGCGGTAATACGAAGGGAGCTAGCGTTGTTCGGAATTACTGGGCGTAAAGGGCGCGTAGGCGGCTCTGTAAGTCAGATGTGAAAGCCCCGGGCTTAACCTGGGAACTGCATTTGATACTGCAGAGCTAGAGATCGAGAGA
g__Parachlamydia, FS10000387:4:BNT40308-1625:1:1102:8990:2720 1:N:0:1	k__Bacteria, p__Chlamydiae, c__Chlamydiia, o__Chlamydiales, f__Parachlamydiaceae, g__Parachlamydia, s__	380	33	13	0	4	0	319	0	0	0	0	10	1	0	0	0	0	0	0	0	0	0	0	0	0	0	0	0	0	0	0	0	0	0	0	0	0	0	0	0	0	0	0	0	0	GCAGCCGCGGTAATACAGAGGGTGCAAGCATTAATCGGATTTATTGGGCGTAAAGGGCGCGTAGGCGGGATTGCAAGTCAGATGTGAAATCCTGGAGCTCAACTCCAGAACAGCATTTGAAACTACAGTTCTAGAGGGTAGGCGGAG
g__Perlucidibaca, FS10000387:3:BNT40308-2320:1:1101:14220:1270 1:N:0:5	k__Bacteria, p__Proteobacteria, c__Gammaproteobacteria, o__Pseudomonadales, f__Moraxellaceae, g__Perlucidibaca, s__	775	63	24	0	38	1	141	0	0	0	0	0	9	0	0	0	0	7	0	0	0	0	0	178	3	0	25	10	12	0	1	0	0	0	110	0	0	6	0	143	0	0	0	2	2	GTGTCAGCAGCCGCGGTAATACAGAGGGTGCAAGCGTTAATCGGAATTACTGGGCGTAAAGCGCGCGTAGGCGGTTGTATAAGTTGGAGGTGAAATCCCCGGGCTCAACCTGGGAATTGCCTTCAAAACTGTACGGCTAGAGTGTGGGAGA
f__Comamonadaceae, FS10000387:3:BNT40308-2320:1:1103:16050:1940 1:N:0:5	k__Bacteria, p__Proteobacteria, c__Betaproteobacteria, o__Burkholderiales, f__Comamonadaceae, g__, s__	313	0	0	0	0	0	0	0	0	0	0	0	0	0	0	0	0	0	0	0	0	0	0	8	0	0	0	14	34	11	0	2	0	6	226	0	0	0	6	6	0	0	0	0	0	GTGTCAGCAGCCGCGGTAATACGTAGGGTGCAAGCGTTAATCGGAATTACTGGGCGTAAAGCGTGCGCAGGCGGTTCTATAAGACAGGCGTGAAATCCCCGGGCTTAACCTGGGAATTGCGTTTGTGACTGTAGGACTAGAGTGCGTCAGA
f__Rhodospirillaceae, FS10000387:4:BNT40308-1625:1:1101:10550:2070 1:N:0:6	k__Bacteria, p__Proteobacteria, c__Alphaproteobacteria, o__Rhodospirillales, f__Rhodospirillaceae, g__, s__	178	0	0	0	0	0	131	0	0	0	7	9	18	0	0	0	0	13	0	0	0	0	0	0	0	0	0	0	0	0	0	0	0	0	0	0	0	0	0	0	0	0	0	0	0	GCCGCCGCGGTAAGACGAAGGGGGCTAGCGTTGTTCGGAATTACTGGGCGTAAAGCGAGTGTAGGCGGTTGCCGTAGTCAGGTGTGAAAGCCTTGAGCTCAACTCAAGAAATGCACTTGATACTGGGTGACTAGAGGACCGGAGAGG
f__Sphingobacteriaceae, FS10000387:3:BNT40308-2320:1:1101:10390:1100 1:N:0:5	k__Bacteria, p__Bacteroidetes, c__Sphingobacteriia, o__Sphingobacteriales, f__Sphingobacteriaceae, g__, s__	192	0	0	0	0	0	0	0	0	0	0	0	0	0	0	0	0	0	0	0	0	0	0	155	0	0	0	4	0	0	0	0	0	0	1	0	0	0	0	30	0	0	0	0	2	GTGTCAGCCGCCGCGGTAATACGGAGGATCCAAGCGTTATCCGGATTTATTGGGTTTAAAGGGTGCGTAGGTGGCCTGGTAAGTCAGGGGTGAAAGACGGTAGCTTAACTATCGCAGTGCCCTTGATACTGCCGGGCTTGAATGAACTAGA
g__Pedobacter, FS10000387:3:BNT40308-2320:1:1104:8180:1500 1:N:0:4	k__Bacteria, p__Bacteroidetes, c__Sphingobacteriia, o__Sphingobacteriales, f__Sphingobacteriaceae, g__Pedobacter, s__	96	0	0	0	0	0	12	0	0	0	0	0	0	0	0	0	0	0	0	0	0	0	0	0	16	10	6	0	2	6	0	17	8	4	0	2	0	9	0	0	3	0	0	0	1	GTGTCAGCAGCGGTAATACGGAGGATCCAAGCGTTATCCGGATTTATTGGGTTTAAAGGGTGCGTAGGCGGCCTGTTAAGTCAGGGGTGAAAGACGGTGGCTCAACCATCGCAGTGCCCTTGATACTGATGGGCTTGAATAGACTAGAGGT
g__Coraliomargarita, FS10000387:4:BNT40308-1625:1:1101:4570:3930 1:N:0:4	k__Bacteria, p__Verrucomicrobia, c__Opitutae, o__Puniceicoccales, f__Puniceicoccaceae, g__Coraliomargarita, s__	124	0	0	0	59	49	14	0	0	0	0	0	2	0	0	0	0	0	0	0	0	0	0	0	0	0	0	0	0	0	0	0	0	0	0	0	0	0	0	0	0	0	0	0	0	GCAGCCGCGGTAATACAGAGACTACAAGCGTTACTCGGATTCACTGGGCGTAAAGGGTGCGTAGGTGGCTAAATGTGTTGGATGTGAAATCTCGGGGCTTAACTCCGAAACTGCGTCCAAAACTGTTTAGCTTGAGTCCTGGAGGGG
f__Acetobacteraceae, FS10000387:4:BNT40308-1625:1:1101:1730:2260 1:N:0:18	k__Bacteria, p__Proteobacteria, c__Alphaproteobacteria, o__Rhodospirillales, f__Acetobacteraceae, g__, s__	90	0	0	0	0	0	0	0	0	0	0	0	0	0	0	0	0	89	0	0	0	1	0	0	0	0	0	0	0	0	0	0	0	0	0	0	0	0	0	0	0	0	0	0	0	GCAGCCGCGGTAATACGAAGGGGGCTAGCGTTGCTCGGAATTACTGGGCGTAAAGGGCGCGTAGGCGGCCCAGCCAGTCAGGCGTGAAATTCCTGGGCTTAACCTGGGGACTGCGCTTGATACTGCTGGGCTTGAGGCCGAGAGAGG
f__Pseudoalteromonadaceae, FS10000387:3:BNT40308-2320:1:1101:12000:2880 1:N:0:5	k__Bacteria, p__Proteobacteria, c__Gammaproteobacteria, o__Vibrionales, f__Pseudoalteromonadaceae, g__, s__	93	0	0	0	0	0	0	0	0	0	0	0	0	0	0	0	0	0	0	0	0	0	0	52	0	0	1	0	3	7	0	0	1	0	25	1	0	0	1	2	0	0	0	0	0	GTGTCAGCCGCCGCGGTAATACGGAGGGTGCGAGCGTTAATCGGAATTACTGGGCGTAAAGCGCATGCAGGTGGTTTGTTAAGTCAGATGTGAAAGCCCTGGGCTTAACCTAGGAATAGCATTTGAAACTGACAAGCTAGAGTACTGTAGA
g__Perlucidibaca, FS10000387:4:BNT40308-1625:1:1101:5770:1390 1:N:0:19	k__Bacteria, p__Proteobacteria, c__Gammaproteobacteria, o__Pseudomonadales, f__Moraxellaceae, g__Perlucidibaca, s__	95	0	0	0	0	0	0	0	0	0	0	0	0	0	0	0	0	0	93	0	0	0	0	0	0	0	0	0	0	0	0	0	0	0	2	0	0	0	0	0	0	0	0	0	0	GCAGCCGCGGTAATACAGAGGGTGCAAGCGTTAATCGGAATTACTGGGCGTAAAGCGCGCGTAGGCGGTTGTATAAGTTGGGTGTGAAATCCCCGGGCTCAACCTGGGAATTGCACTCAAAACTGTACGGCTAGAGTGTGGGAGAGG
g__Perlucidibaca, FS10000387:3:BNT40308-2320:1:1101:5520:2020 1:N:0:16	k__Bacteria, p__Proteobacteria, c__Gammaproteobacteria, o__Pseudomonadales, f__Moraxellaceae, g__Perlucidibaca, s__	79	0	0	0	0	0	0	0	0	0	0	0	0	0	0	0	0	0	0	0	0	0	0	1	0	0	0	0	3	0	4	0	0	0	70	0	0	0	0	1	0	0	0	0	0	GTGCCAGCAGCCGCGGTAATACAGAGGGTGCAAGCGTTAATCGGAATTACTGGGCGTAAAGCGCGCGTAGGCGGTTGTATAAGTTGGGTGTGAAATCCCCGGGCTCAACCTGGGAATTGCACTCAAAACTGTACGGCTAGAGTGTGGGAGA
c__SJA-4, FS10000387:4:BNT40308-1625:1:1101:8620:2060 1:N:0:4	k__Bacteria, p__TM6, c__SJA-4, o__, f__, g__, s__	55	0	0	0	53	2	0	0	0	0	0	0	0	0	0	0	0	0	0	0	0	0	0	0	0	0	0	0	0	0	0	0	0	0	0	0	0	0	0	0	0	0	0	0	0	GCCGCCGCGGTAATACGAGGGGTGCAAGCGTTATTCGGAATAATTGGGCGTAAAGGGTGCGTAGACGGCATATTAAGTCAACTGTTAAATACCTCGGCCTAACTGGGGACCGGCAGTAGATACTGATGTGCTAGAGGATGGAAGAGA
f__[Cerasicoccaceae], FS10000387:3:BNT40308-2320:1:1115:15870:1490 1:N:0:4	k__Bacteria, p__Verrucomicrobia, c__Opitutae, o__[Cerasicoccales], f__[Cerasicoccaceae], g__, s__	176	0	0	0	0	0	0	0	1	0	0	0	15	0	0	0	0	0	0	0	0	2	1	1	6	7	16	6	12	12	0	27	19	14	0	8	5	4	16	0	0	0	0	1	3	GTGTCAGCCGCGGTAATACAGAGACTGCAAGCGTTACTCGGATTCACTGGGCGTAAAGGGAGCGCAGGCGGACCGGTGTGTCAGATGTGAAACCCCAGGGCTCAACCTTGGGACTGCGTCTGAAACTGCCGGTCTAGGGACTCGGAGGGG
f__Sphingomonadaceae, FS10000387:4:BNT40308-1625:1:1102:10170:1670 1:N:0:6	k__Bacteria, p__Proteobacteria, c__Alphaproteobacteria, o__Sphingomonadales, f__Sphingomonadaceae, g__, s__	77	0	0	0	0	0	13	0	0	47	0	1	16	0	0	0	0	0	0	0	0	0	0	0	0	0	0	0	0	0	0	0	0	0	0	0	0	0	0	0	0	0	0	0	0	GCAGCCGCGGTAATACGGAGGGGGCTAGCGTTGTTCGGAATTACTGGGCGTAAAGCGCACGTAGGCGGTTACTCAAGTCAGAGGTGAAAGCCCGGAGCTCAACTTCGGAATTGCCTTTGAAACTAGGTGACTTGAACGTCGGAGAGG
g__Perlucidibaca, FS10000387:3:BNT40308-2320:1:1110:10280:2970 1:N:0:2	k__Bacteria, p__Proteobacteria, c__Gammaproteobacteria, o__Pseudomonadales, f__Moraxellaceae, g__Perlucidibaca, s__	85	0	0	0	0	0	0	0	0	0	0	0	0	0	0	0	0	0	0	0	0	0	0	5	0	0	3	65	12	0	0	0	0	0	0	0	0	0	0	0	0	0	0	0	0	GTGTCAGCAGCCGCGGTAATACAGAGGGTGCAAGCGTTAATCGGAATTACTGGGCGTAAAGCGCGCGTAGGCGGTTACGTAAGTTGGGTGTGAAATCCCCGGGCTCAACCTGGGAATTGCACTCAAAACTGCGTGGCTAGAGTGTGGGAGA
f__Gemmataceae, FS10000387:4:BNT40308-1625:1:1101:8430:2650 1:N:0:12	k__Bacteria, p__Planctomycetes, c__Planctomycetia, o__Gemmatales, f__Gemmataceae, g__, s__	72	0	0	0	0	0	0	0	0	0	0	0	70	1	1	0	0	0	0	0	0	0	0	0	0	0	0	0	0	0	0	0	0	0	0	0	0	0	0	0	0	0	0	0	0	GCAGCCGCGGTAAGACGAACCGTGCGAACGTTATTCGGAATCACTGGGCTTAAAGGGCGCGTAGGCGGGTAGATAAGTCGAGGGTGAAAGCCTCTAGCTTAACTAGAGAAGTGCCCTCGAAACTATTTGTCTTGAGAGAGATAGGGG
c__SJA-4, FS10000387:3:BNT40308-2320:1:1101:15850:1510 1:N:0:2	k__Bacteria, p__TM6, c__SJA-4, o__, f__, g__, s__	45	0	0	0	0	0	0	0	0	0	0	0	0	0	0	0	0	0	0	0	0	0	0	0	0	0	27	0	0	6	5	0	0	0	0	0	7	0	0	0	0	0	0	0	0	GTGTCAGCAGCCGCGGTAATACGAGGGGTGCAAGCGTTATTCGGATTAATTGGGCGTAAAGGGTGCGCAGACGGTTTGTTAAGTCACTTGTTAAATTCTTCGGCCTAACTGAAGGTGTGCAGGTGATACTGGCGGACTCGAGGGTGGAAGA
c__CK-1C4-19, FS10000387:3:BNT40308-2320:1:1101:1220:2030 1:N:0:16	k__Bacteria, p__Tenericutes, c__CK-1C4-19, o__, f__, g__, s__	31	0	0	0	0	0	0	0	0	0	0	0	0	0	0	0	0	0	0	0	0	0	0	0	0	0	0	0	28	0	0	0	0	0	0	0	0	0	0	3	0	0	0	0	0	GTGTCAGCCGCCGCGGTAATACGTAGGTGGCGAGCGTTATCCGGAATTATTGGGCGTAAAGGGCGTGTAGGCGGTGCTTTAAGTCTGACGTGAAAGCCAACGGCTCAACCGTTGAAATGCGTTGGAAACTGGAGCACTTGAGTGTCGGAGA
f__Isosphaeraceae, FS10000387:4:BNT40308-1625:1:1102:7050:3940 1:N:0:6	k__Bacteria, p__Planctomycetes, c__Planctomycetia, o__Gemmatales, f__Isosphaeraceae, g__, s__	67	0	0	0	0	0	60	0	0	0	0	0	4	0	0	0	0	3	0	0	0	0	0	0	0	0	0	0	0	0	0	0	0	0	0	0	0	0	0	0	0	0	0	0	0	GCAGCCGCGGTAAGACGAACCGTGCGAACGTTATTCGGAATCACTGGGCTTAAAGCGCGTGTAGGCGGGACGACGCGTCGGTCGCTGAAAGCCCCCGGCTCAACCGGGGAACGGGCGCCGATACGGTCGTCCTCGAGGGACGTAGGG
f__[Weeksellaceae], FS10000387:3:BNT40308-2320:1:1101:2570:2840 1:N:0:16	k__Bacteria, p__Bacteroidetes, c__Flavobacteriia, o__Flavobacteriales, f__[Weeksellaceae], g__, s__	45	0	0	0	0	0	0	0	0	0	0	0	0	0	0	0	0	0	0	0	0	0	0	0	0	0	0	0	45	0	0	0	0	0	0	0	0	0	0	0	0	0	0	0	0	GTGTCAGCAGCCGCGGTAATACGGAGGGTGCAAGCGTTATCCGGATTTATTGGGTTTAAAGGGTCCGTAGGCGGGCCTATAAGTCAGTGGTGAAAGCCTATCGCTTAACGATAGAACTGCCATTGATACTGTAGGCCTTGAGTATATTTGA
g__Bacillus, FS10000387:4:BNT40308-1625:1:1101:7890:1290 1:N:0:1	k__Bacteria, p__Firmicutes, c__Bacilli, o__Bacillales, f__Bacillaceae, g__Bacillus, s__	58	29	0	0	0	0	0	5	0	14	0	0	0	0	0	1	0	0	0	7	0	2	0	0	0	0	0	0	0	0	0	0	0	0	0	0	0	0	0	0	0	0	0	0	0	GCCGCCGCGGTAATACGTAGGTGGCAAGCCTTGTCCGGAATTATTGGGCGTAAAGCGCGCGCAGGCGGTCTCTTAAGTCTGATGTGAAATCTCGCGGCTCAACCGCGAGCGGCCATTGGAAACTGGGAGGCTTGAGTGCAGAAGAGG
f__Coxiellaceae, FS10000387:3:BNT40308-2320:1:1111:8080:2560 1:N:0:5	k__Bacteria, p__Proteobacteria, c__Gammaproteobacteria, o__Legionellales, f__Coxiellaceae, g__, s__	35	0	0	0	0	0	0	0	0	0	0	0	0	0	0	0	0	0	0	0	0	0	0	2	25	0	5	0	0	0	0	0	0	0	3	0	0	0	0	0	0	0	0	0	0	GTGTCAGCAGCCGCGGTAATACAGAGGGTGCAAGCGTTAATCGGAATGACTGGGCGTAAAGGGCGTGTAGGTGGAAACATAAGTTAGATGTGAAATCCCTGGGCTTAACCTAGGAACGCCATCTAATACTGTGTATCTAGAGTACAGGAGA
o__Chlamydiales, FS10000387:3:BNT40308-2320:1:1101:14700:2050 1:N:0:5	k__Bacteria, p__Chlamydiae, c__Chlamydiia, o__Chlamydiales, f__, g__, s__	45	0	0	0	0	0	0	0	0	0	0	0	0	0	0	0	0	0	0	0	0	0	0	42	0	0	0	0	0	0	1	0	0	0	0	0	0	0	0	2	0	0	0	0	0	GTGTCAGCAGCCGCGGTAATACGGAGGGTGCAAGCATTGATCGGAATTACTGGGTGTAAAGGGCGCGTAGGCGGCAGGAAAAGTCTGATGTGAAATTCCGGGGCTCAACCCCGGAGCTGCATTGGAAACTGACCAGCTAGAGGTTGGTAAG
f__Comamonadaceae, FS10000387:3:BNT40308-2320:1:1112:9900:1890 1:N:0:16	k__Bacteria, p__Proteobacteria, c__Betaproteobacteria, o__Burkholderiales, f__Comamonadaceae, g__, s__	48	0	0	0	0	0	0	0	0	0	0	0	0	0	0	0	0	0	0	0	0	0	0	0	0	0	0	0	12	0	0	0	0	0	36	0	0	0	0	0	0	0	0	0	0	GTGTCAGCAGCCGCGGTAATACGTAGGGTGCAAGCGTTAATCGGAATTACTGGGCGTAAAGCGTGCGCAGGCGGCTATGTAAGACAGGTGTGAAATCCCCGAGCTTAACTTGGGAATTGCATTTGTGACTGCATGGCTAGAGTGTGTCAGA
f__Coxiellaceae, FS10000387:4:BNT40308-1625:1:1101:12350:2640 1:N:0:6	k__Bacteria, p__Proteobacteria, c__Gammaproteobacteria, o__Legionellales, f__Coxiellaceae, g__, s__	32	0	0	0	0	0	32	0	0	0	0	0	0	0	0	0	0	0	0	0	0	0	0	0	0	0	0	0	0	0	0	0	0	0	0	0	0	0	0	0	0	0	0	0	0	GCAGCCGCGGTAATACAGAGAGTGCAAGCGTTAATCGGAATTACTGGGCGTAAAGCGCACGTAGGTGGAATTTTAAGTCGGATGTGAAATCCCTGGGCTTAACCTAGGAATTGCATTCGATACTGGGATTCTAGAATATGGTAGAGG
f__Legionellaceae, FS10000387:4:BNT40308-1625:1:1102:1370:2200 1:N:0:6	k__Bacteria, p__Proteobacteria, c__Gammaproteobacteria, o__Legionellales, f__Legionellaceae, g__, s__	35	0	0	0	0	0	33	0	0	0	0	0	1	1	0	0	0	0	0	0	0	0	0	0	0	0	0	0	0	0	0	0	0	0	0	0	0	0	0	0	0	0	0	0	0	GCCGCCGCGGTAATACGGAGGGTGCAAGCGTTAATCGGAATTACTGGGCGTAAAGGGTGCGTAGGTGGTTATATAAGTTATCTGTGAAATCCCCGGGCTCAACCTGGGCAGGTCAGATGAGACTGTATGACTCGAGTATAGGAGAGG
g__Planctomyces, FS10000387:3:BNT40308-2320:1:1105:11640:1300 1:N:0:3	k__Bacteria, p__Planctomycetes, c__Planctomycetia, o__Planctomycetales, f__Planctomycetaceae, g__Planctomyces, s__	30	0	0	0	0	0	0	0	0	0	0	0	0	0	0	0	0	0	0	0	0	0	0	0	0	30	0	0	0	0	0	0	0	0	0	0	0	0	0	0	0	0	0	0	0	GTGTCAGCAGCCGCGGTAATACGAACTGTGCAAACGTTATTCGGAATCACTGGGCTTAAAGGGTGCGTAGGCGGCTCATTAAGTAGGGTGTGAAAGCCCCCGGCTCAACCGGGGAATTGCGCTCTAAACTGATGGGCTGGAGTGAGATAGG
f__Neisseriaceae, FS10000387:4:BNT40308-1625:1:1101:14720:1540 1:N:0:21	k__Bacteria, p__Proteobacteria, c__Betaproteobacteria, o__Neisseriales, f__Neisseriaceae, g__, s__	16	0	0	0	0	0	0	0	0	0	0	0	0	0	0	0	0	0	0	0	16	0	0	0	0	0	0	0	0	0	0	0	0	0	0	0	0	0	0	0	0	0	0	0	0	GCCGCCGCGGTAATACGTAGGGTCCAAGCGTTAATCGGAATTACTGGGCGTAAAGCGTGCGCAGGTGGTTTGTTAAGCACGATGTGAAATCCCCGAGCTCAACTTGGGAATTGCATTGTGAACTGGCTAACTAGAGTACGGCAGAGG
c__SJA-4, FS10000387:4:BNT40308-1625:1:1101:8500:3380 1:N:0:4	k__Bacteria, p__TM6, c__SJA-4, o__, f__, g__, s__	32	0	0	0	31	0	0	0	0	0	0	0	0	0	0	0	0	0	0	1	0	0	0	0	0	0	0	0	0	0	0	0	0	0	0	0	0	0	0	0	0	0	0	0	0	GCAGCCGCGGTAATACGAGTGGTGCTAGCGTTATTCGGATTTATTGGGCGTAAAGGGTGTGTAGACGGCATACTAAGTCATCTGTTTAATTCTCCGGCCTAACCGGAGCCCAGCGGGTGAAACTGGTATGATAGAGGGTGGAAGAGA
f__[Cerasicoccaceae], FS10000387:4:BNT40308-1625:1:1105:12200:2080 1:N:0:6	k__Bacteria, p__Verrucomicrobia, c__Opitutae, o__[Cerasicoccales], f__[Cerasicoccaceae], g__, s__	27	0	0	0	0	0	27	0	0	0	0	0	0	0	0	0	0	0	0	0	0	0	0	0	0	0	0	0	0	0	0	0	0	0	0	0	0	0	0	0	0	0	0	0	0	GCAGCCGCGGTAATACAGAGACTGCAAGCGTTACTCGGATTCACTGGGCGTAAAGGGAGCGCAGGCGGATTGGTGTGTCGGATGTGAAATCCCGGGGCTTAACTCCGGGGCTGCGTCCGAAACTGCCGATCTAGAGACTCGGAGG
f__Cyclobacteriaceae, FS10000387:3:BNT40308-2320:1:1105:14520:4070 1:N:0:5	k__Bacteria, p__Bacteroidetes, c__Cytophagia, o__Cytophagales, f__Cyclobacteriaceae, g__, s__	29	0	0	0	0	0	0	0	0	0	0	0	0	0	0	0	0	0	0	0	0	0	0	17	0	0	0	0	6	0	0	0	0	0	6	0	0	0	0	0	0	0	0	0	0	GTGTCAGCAGCCGCGGTAATACGGAGGGTGCAAGCGTTGTCCGGATTTATTGGGTTTAAAGGGTGCGTAGGCGGCCCTATAAGTCAGTGGTGAAAGCCTCCAGCTTAACTGGAGAACTGCCATTGATACTGTAGGGCTTGAGTATACTTGA
c__Betaproteobacteria, FS10000387:4:BNT40308-1625:1:1103:14500:1090 1:N:0:6	k__Bacteria, p__Proteobacteria, c__Betaproteobacteria, , , ,	48	1	0	0	0	0	40	0	0	0	0	0	0	0	0	0	0	7	0	0	0	0	0	0	0	0	0	0	0	0	0	0	0	0	0	0	0	0	0	0	0	0	0	0	0	GCCGACGCGGTAATACGTAGGGTGCAAGCGTTAATCGGAATTACTGGGCGTAAAGCGTGCGCAGGCGGTTATGTAAGACAGAGGTGAAATCCCCGGGCTCAACCTGGGAACTGCCTTTGTGACTGCATGACTAGAGTACGGTAGAGG
o__Rickettsiales, FS10000387:3:BNT40308-2320:1:1107:1430:2620 1:N:0:5	k__Bacteria, p__Proteobacteria, c__Alphaproteobacteria, o__Rickettsiales, f__, g__, s__	34	0	0	0	0	0	0	0	0	0	0	0	0	0	0	0	0	0	0	0	0	0	0	5	0	0	1	8	3	0	2	6	6	2	0	0	0	1	0	0	0	0	0	0	0	GTGTCAGCCGCGGTAATACGAAGGGAGCTAGCGTTGTTCGGAATTACTGGGCGTAAAGGGCGCGTAGGCGGCTCTGTAAGTCAGATGTGAAAGCCCCGGGCTTAACCTGGGAACTGCATTTGATACTGCAGAGCTAGAGATCGAGAGAGGA
f__Xanthomonadaceae, FS10000387:3:BNT40308-2320:1:1111:6300:4050 1:N:0:1	k__Bacteria, p__Proteobacteria, c__Gammaproteobacteria, o__Xanthomonadales, f__Xanthomonadaceae, g__, s__	14	0	0	0	0	0	0	0	0	0	0	0	0	0	0	0	0	0	0	0	0	0	0	0	0	0	0	2	1	0	0	0	0	6	1	0	0	0	0	4	0	0	0	0	0	GTGTCAGCCGCCGCGGTAATACGAAGGGTGCAAGCGTTACTCGGAATTACTGGGCGTAAAGCGTGAGTAGGTGGTTTCTTAAGTCTGCTGTGAAAGCCCCGGGCTCAACCTGGGAATTGCAGTGGATACTGGGAAGCTAGAGTGCGGTAGA
o__Rickettsiales, FS10000387:4:BNT40308-1625:1:1102:11920:3050 1:N:0:6	k__Bacteria, p__Proteobacteria, c__Alphaproteobacteria, o__Rickettsiales, f__, g__, s__	16	0	0	0	0	0	16	0	0	0	0	0	0	0	0	0	0	0	0	0	0	0	0	0	0	0	0	0	0	0	0	0	0	0	0	0	0	0	0	0	0	0	0	0	0	GCAGCCGCGGTAATACGAAGGGAGCTAGCGTTGTTCGGAATTACTGGGCGTAAAGGGCGCGTAGGCGGTAAGATAAGTCAGATGTGAAAGCCTTGGGCTTAACCTGAGAACTGCATTTGATACTGTCTAACTAGAGGACGAGAGAGG
g__Bdellovibrio, FS10000387:3:BNT40308-2320:1:1101:16310:3490 1:N:0:32	k__Bacteria, p__Proteobacteria, c__Deltaproteobacteria, o__Bdellovibrionales, f__Bdellovibrionaceae, g__Bdellovibrio, s__	26	0	0	0	0	0	0	0	0	0	0	0	0	0	0	0	0	0	0	0	0	0	0	0	0	0	0	0	0	0	0	0	0	0	0	0	0	0	0	25	0	0	1	0	0	GTGTCAGCAGCCGCGGTAAGACGAGGGATCCTAGCGTTGTTCGGAATTATTGGGCGTAAAGCGGATGTAGGTGGCTATATAAGTCAGATGTGAAAGCCCAGGGCTTAACCCTGGAAGTGCATTTGATACTGTGTAGCTTGAGTGTGGGAGA
f__[Cerasicoccaceae], FS10000387:3:BNT40308-2320:1:1102:7220:1850 1:N:0:20	k__Bacteria, p__Verrucomicrobia, c__Opitutae, o__[Cerasicoccales], f__[Cerasicoccaceae], g__, s__	19	0	0	0	0	0	2	5	0	0	0	0	5	0	0	2	0	0	0	0	0	1	0	0	0	0	0	0	0	0	0	2	0	0	0	2	0	0	0	0	0	0	0	0	0	GCCGCCGCGGTAATACAGAGACTGCAAGCGTTACTCGGATTCACTGGGCGTAAAGGGAGCGCAGGCGGACCGGTGTGTCAGATGTGAAACCCCAGGGCTCAACCTTGGGACTGCGTCTGAAACTGCCGGTCTAGGGACTCGGAGGGGCTA
o__MLE1-12, FS10000387:3:BNT40308-2320:1:1108:14300:2820 1:N:0:3	k__Bacteria, p__Cyanobacteria, c__4C0d-2, o__MLE1-12, f__, g__, s__	22	0	0	0	0	0	0	0	0	0	0	0	0	0	0	0	0	0	0	0	0	0	0	0	0	5	0	0	0	0	0	0	0	16	0	0	1	0	0	0	0	0	0	0	0	GTGTCAGCAGCCGCGGTAAGACGTAGGATGCAAGCGTTGTCCGGATTTATTGGGCGTAAAGAGTTCGTAGGCGGTTTGTTAAGTCTGATGTTAAAGATCGGGGCTCAACCTCGGGAGTGCATTGGATACTGGCAGACTGGAGTGTGGTAGA
c__SJA-4, FS10000387:4:BNT40308-1625:1:1101:1160:2080 1:N:0:4	k__Bacteria, p__TM6, c__SJA-4, o__, f__, g__, s__	17	0	0	0	17	0	0	0	0	0	0	0	0	0	0	0	0	0	0	0	0	0	0	0	0	0	0	0	0	0	0	0	0	0	0	0	0	0	0	0	0	0	0	0	0	GCCGCCGCGGTAATACGAAGGGTGCAAACGTTATTCGGAATCACTGGGCGTAAAGGGTGCGTAGACGGTATGTTAAGTTTGTTGTTAAAGGCTCCGGCCTAACCGGAGTATTGCGATGAAAACTGGCAGGCTAGAGGGTGAGAGAGA
g__Ramlibacter, FS10000387:4:BNT40308-1625:1:1102:11610:3310 1:N:0:6	k__Bacteria, p__Proteobacteria, c__Betaproteobacteria, o__Burkholderiales, f__Comamonadaceae, g__Ramlibacter, s__	52	0	0	0	0	0	49	0	0	0	0	0	3	0	0	0	0	0	0	0	0	0	0	0	0	0	0	0	0	0	0	0	0	0	0	0	0	0	0	0	0	0	0	0	0	GCCGACGCGGTAATACGTAGGGTGCAAGCGTTAATCGGAATTACTGGGCGTAAAGCGTGCGCAGGCGGTTATGTAAGACAGGTGTGAAATCCCCGGGCTTAACCTGGGAACTGCACTTGTGACTGCATAGCTTGAGTGCGGCAGAGG
f__Legionellaceae, FS10000387:3:BNT40308-2320:1:1110:10870:3900 1:N:0:21	k__Bacteria, p__Proteobacteria, c__Gammaproteobacteria, o__Legionellales, f__Legionellaceae, g__, s__	14	0	0	0	0	0	0	0	0	0	0	0	0	0	0	0	0	0	0	0	0	0	0	0	0	0	0	0	0	0	0	0	0	0	3	0	0	11	0	0	0	0	0	0	0	GTGTCAGCAGCCGCGGTAATACGGAGGGTGCGAGCGTTAATCGGAATTACTGGGCGTAAAGGGTGCGTAGGTGGTTTAGTAAGTTATCTGTGAAATTCCTGGGCTTAACCTAGGGTGGTCAGATAAGACTGCAAGACTCGAGTATGGGAGA
g__Leptotrichia, FS10000387:4:BNT40308-1625:1:1104:14200:2820 1:N:0:20	k__Bacteria, p__Fusobacteria, c__Fusobacteriia, o__Fusobacteriales, f__Leptotrichiaceae, g__Leptotrichia, s__	16	0	0	0	0	0	0	0	0	0	0	0	0	0	0	0	0	0	0	16	0	0	0	0	0	0	0	0	0	0	0	0	0	0	0	0	0	0	0	0	0	0	0	0	0	GCCGCCGCGGTAATACGTATGTCGCGAGCGTTATCCGGAATTATTGGGCATAAAGGGCATCTAGGCGGCCTAACAAGTCAGGGGTGAAAACCTGCGGCTCAACCGCAGGCTTGCCTTTGAAACTGTAAGGCTGGAGTATCGGAGAGG
o__Sphingobacteriales, FS10000387:4:BNT40308-1625:1:1105:4400:1030 1:N:0:2	k__Bacteria, p__Bacteroidetes, c__Sphingobacteriia, o__Sphingobacteriales, f__, g__, s__	19	0	1	0	0	0	7	3	2	1	0	0	0	0	0	1	0	4	0	0	0	0	0	0	0	0	0	0	0	0	0	0	0	0	0	0	0	0	0	0	0	0	0	0	0	GCCGACGCGGTAATACGAAGGATGCAAGCGTTATCCGGATTCATTGGGTTTAAAGGGTGCGTAGGCGGACCTGTAAGTCAGTGGTGAAATCTCTCAGCTTAACTGAGAAACTGCCATTGATACTGCAGGTCTAGAGTATAGATGACG
c__SJA-4, FS10000387:3:BNT40308-2320:1:1101:9260:1240 1:N:0:20	k__Bacteria, p__TM6, c__SJA-4, o__, f__, g__, s__	10	0	0	0	0	0	0	0	0	0	0	0	0	0	0	0	0	0	0	0	0	0	0	0	0	0	0	0	0	0	0	0	0	0	0	10	0	0	0	0	0	0	0	0	0	GTGTCAGCAGCCGCGGTAATACGAGTGGTGCTAGCGTTATTCGGATTTATTGGGCGTAAAGGGTGCGTAGACGGTGTGATAAGTCTGTTGTTAAATTCCTCGGCTCAACTGAGGTCCTGCAATGGAAACTATCATGCTAGAGGGTGGAAGA
c__TM7-1, FS10000387:4:BNT40308-1625:1:1103:3740:2870 1:N:0:22	k__Bacteria, p__TM7, c__TM7-1, o__, f__, g__, s__	27	0	0	0	0	0	0	0	0	0	0	0	0	0	0	0	0	1	0	0	0	26	0	0	0	0	0	0	0	0	0	0	0	0	0	0	0	0	0	0	0	0	0	0	0	GCCGCCGCGGTAATACGTAGGACCCAAGCGTTATCCGGAATTACTGGGCGTAAAGAGTTGCGTAGGTGGCATTATAAGTGGAGCGTGAAAGCGTGCGGCTCAACCGCATTACTGCGTTCCAAACTGTGAGGCTTGAGTATGAGAGAG
g__Wautersiella, FS10000387:3:BNT40308-2320:1:1103:14960:2610 1:N:0:17	k__Bacteria, p__Bacteroidetes, c__Flavobacteriia, o__Flavobacteriales, f__[Weeksellaceae], g__Wautersiella, s__	12	0	0	0	0	0	0	0	0	0	0	0	0	0	0	0	0	0	0	0	0	0	0	0	0	0	0	0	0	0	0	0	0	0	0	0	0	0	12	0	0	0	0	0	0	GTGTCAGCAGCCGCGGTAATACGGAGGGTGCAAGCGTTATCCGGATTTATTGGGTTTAAAGGGTCCGTAGGCGGATTAGTAAGTCAGTGGTGAAAGCCCGCAGCTCAACTGTGGAACTGCCATTGATACTGCTAGTCTTGAGTGTAGTTGA
g__Gemmata, FS10000387:3:BNT40308-2320:1:1103:7450:1690 1:N:0:3	k__Bacteria, p__Planctomycetes, c__Planctomycetia, o__Gemmatales, f__Gemmataceae, g__Gemmata, s__	12	0	0	0	0	0	0	0	0	0	0	0	0	0	0	0	0	0	0	0	0	0	0	0	0	12	0	0	0	0	0	0	0	0	0	0	0	0	0	0	0	0	0	0	0	GTGTCAGCAGCCGCGGTAAGACGAACCGTGCGAACGTTGTTCGGAATCACTGGGCTTAAAGGGCGCGTAGGCGGGCTACCAAGTCCGGGGTGAAATCCTCCAGCTCAACTGGAGAACGGCCTCGGATACTGGTGGTCTCGAGGGGGATAGG
g__Pedobacter, FS10000387:3:BNT40308-2320:1:1104:13900:2000 1:N:0:16	k__Bacteria, p__Bacteroidetes, c__Sphingobacteriia, o__Sphingobacteriales, f__Sphingobacteriaceae, g__Pedobacter, s__	38	0	0	0	0	0	0	0	0	0	0	0	0	0	0	0	0	0	0	0	0	0	0	2	0	1	3	9	9	1	0	1	0	5	5	0	0	0	0	2	0	0	0	0	0	GTGTCAGCCGCCGCGGTAATACGGAGGATCCGAGCGTTATCCGGATTTATTGGGTTTAAAGGGTGCGTAGGCGGCCTGTTAAGTCAGGGGTGAAAGACGGTGGCTCAACCATCGCAGTGCCCTTGATACTGACGGGCTTGAATTAACTAGT
c__Chlamydiia, FS10000387:3:BNT40308-2320:1:1108:8560:1520 1:N:0:14	k__Bacteria, p__Chlamydiae, c__Chlamydiia, o__, f__, g__, s__	9	0	0	0	0	0	0	0	0	0	0	0	0	0	0	0	0	0	0	0	0	0	0	0	0	0	0	0	0	0	2	0	1	6	0	0	0	0	0	0	0	0	0	0	0	GTGTCAGCAGCCGCGGTAATACGGAGGGTGCAAGCGTTAGTCGGAATTACTGGGCGTAAAGGGAGCGTAGGCTGGGATGTAAGTTAGATGTGAAATACCGTTGCTCAACAACGGCCGTGCATCTAAAACTGCGTTTCTAGAGGGATAGCGG
f__Isosphaeraceae, FS10000387:4:BNT40308-1625:1:1103:14530:1480 1:N:0:6	k__Bacteria, p__Planctomycetes, c__Planctomycetia, o__Gemmatales, f__Isosphaeraceae, g__, s__	16	0	0	0	0	0	14	0	0	0	0	0	2	0	0	0	0	0	0	0	0	0	0	0	0	0	0	0	0	0	0	0	0	0	0	0	0	0	0	0	0	0	0	0	0	GCAGCCGCGGTAAGACGAACCGTGCGAACGTTATTCGGAATCATTGGGCTTAAAGCGCGTGTAGGCGGATAGGAACGTCGGTCGTTGAAAGCCCCCGGCTCAACCGGGGAACTGGCACCGAAACGACCTGTCTAGAGGGGCATAGGG
c__Gammaproteobacteria, FS10000387:4:BNT40308-1625:1:1103:2490:3050 1:N:0:4	k__Bacteria, p__Proteobacteria, c__Gammaproteobacteria, o__, f__, g__, s__	14	0	0	0	14	0	0	0	0	0	0	0	0	0	0	0	0	0	0	0	0	0	0	0	0	0	0	0	0	0	0	0	0	0	0	0	0	0	0	0	0	0	0	0	0	GCAGCCGCGGTAATACAGAGGGTGCGAGCGTTAATCGGAATGACTGGGCGTAAAGCGCGCGTAGGCGGTTATACAAGTTGGGTGTGAAATCCCTGGGCTTAACCTAGGAATTGCATTCAAAACTATATGACTTGAGTGAGGTAGAGG
g__Ramlibacter, FS10000387:4:BNT40308-1625:1:1104:13250:1570 1:N:0:6	k__Bacteria, p__Proteobacteria, c__Betaproteobacteria, o__Burkholderiales, f__Comamonadaceae, g__Ramlibacter, s__	11	0	0	0	0	0	10	0	0	0	0	0	1	0	0	0	0	0	0	0	0	0	0	0	0	0	0	0	0	0	0	0	0	0	0	0	0	0	0	0	0	0	0	0	0	GCAGCGGTAATACGTAGGGTGCAAGCGTTAATCGGAATTACTGGGCGTAAAGCGTGCGCAGGCGGTTATGTAAGACAGGTGTGAAATCCCCGGGCTTAACCTGGGAACTGCACTTGTGACTGCATAGCTTGAGTGCGGCAGAGGGGG
o__Sphingobacteriales, FS10000387:4:BNT40308-1625:1:1107:2220:1800 1:N:0:21	k__Bacteria, p__Bacteroidetes, c__Sphingobacteriia, o__Sphingobacteriales, f__, g__, s__	36	0	0	0	0	0	0	0	0	0	0	0	0	0	0	0	0	0	0	0	28	8	0	0	0	0	0	0	0	0	0	0	0	0	0	0	0	0	0	0	0	0	0	0	0	GCCGCCGCGGTAATACGAAGGATGCAAGCGTTATCCGGATTCATTGGGTTTAAAGGGAGCGTAGGTGGTCTTATAAGTCAGTGGTGAAATCTCCTCGCTTAACGAGGAAATTGCCATTGATACTGTAGGACTTGAGTACAGTTGCCG
o__Pseudomonadales, FS10000387:3:BNT40308-2320:1:1102:12600:1770 1:N:0:2	k__Bacteria, p__Proteobacteria, c__Gammaproteobacteria, o__Pseudomonadales, , ,	14	0	0	0	0	0	0	0	0	0	0	0	0	0	0	0	0	0	0	0	0	0	0	2	0	0	1	0	0	2	0	5	0	0	0	0	0	0	0	0	2	0	0	0	2	GTGTCAGCCGCCGCGGTAAGACGAAGGATGCAAGCGTTAATCGGAATTACTGGGCGTAAAGCGCGCGTAGGTGGTTCGTTAAGTTGGATGTGAAAGCCCCGGGCTCAACCTGGGAACTGCATCCAAAACTGGCGAGCTAGAGTATGGTAGA
f__Acetobacteraceae, FS10000387:3:BNT40308-2320:1:1102:1870:1350 1:N:0:17	k__Bacteria, p__Proteobacteria, c__Alphaproteobacteria, o__Rhodospirillales, f__Acetobacteraceae, g__, s__	10	0	0	0	0	0	0	0	0	0	0	0	0	0	0	0	0	0	0	0	0	0	0	0	0	0	0	0	0	0	0	0	0	0	0	0	0	0	10	0	0	0	0	0	0	GTGTCAGCAGCCGCGGTAATACGAAGGGGGCTAGCGTTACTCGGAATTACTGGGCGTAAAGGGCGCGTAGGCGGCGCACCAAGTTAGGCGTGAAAGCCCTGGGCTCAACCTGGGGACTGCGCTTAAGACTGGTGTGCTTGAGGATGGAAGA
o__Sphingobacteriales, FS10000387:3:BNT40308-2320:1:1102:6260:2060 1:N:0:11	k__Bacteria, p__Bacteroidetes, c__Sphingobacteriia, o__Sphingobacteriales, f__, g__, s__	8	0	0	0	0	0	0	0	0	0	0	0	0	0	0	0	0	0	0	0	0	0	0	0	0	0	0	0	0	0	0	0	0	8	0	0	0	0	0	0	0	0	0	0	0	GTGTCAGCAGCCGCGGTAAGACGAAGGATGCAAGCGTTATCCGGATTCATTGGGTTTAAAGGGAGCGTAGGCGGCCTTGTAAGTCAGTGGTGAAATCTTTGGGCTTAACCCAAAAATTGCCATTGATACTGCAGGGCTTGAGTACAGTTG
o__Pseudomonadales, FS10000387:3:BNT40308-2320:1:1102:8560:2390 1:N:0:2	k__Bacteria, p__Proteobacteria, c__Gammaproteobacteria, o__Pseudomonadales, , ,	16	0	0	0	0	0	0	0	0	0	0	0	0	0	0	0	0	0	0	0	0	0	0	0	0	0	13	0	0	0	0	0	3	0	0	0	0	0	0	0	0	0	0	0	0	GTGCCAGCAGCCGCGGTAATACAGAGGGTGCAAGCGTTAATCGGAATTACTGGGCGTAAAGCGCGCGTAGGTGGTTCGTTAAGTTGGATGTGAAAGCCCCGGGCTCAACCTGGGAACTGCATCCAAAACTGGCGAGCTAGGGACTCGGAGG
f__Enterobacteriaceae, FS10000387:3:BNT40308-2320:1:1103:9650:2560 1:N:0:5	k__Bacteria, p__Proteobacteria, c__Gammaproteobacteria, o__Enterobacteriales, f__Enterobacteriaceae, ,	10	0	0	0	0	0	0	0	0	0	0	0	0	0	0	0	0	0	0	0	0	0	0	2	0	0	1	0	0	0	0	0	0	0	0	0	0	0	0	0	0	0	4	1	2	GTGTCAGCAGCCGCGGTAATACGGAGGGTGCAAGCGTTAATCGGAATTACTGGGCGTAAAGCGCACGCAGGCGGTTTGTTAAGTCAGATGTGAAATCCCCGAGCTTAACTTCGGAACTGCTTTTGAAACTAGCAAGCTAGAATCTTGTAGA
o__Pseudomonadales, FS10000387:3:BNT40308-2320:1:1106:5620:2880 1:N:0:4	k__Bacteria, p__Proteobacteria, c__Gammaproteobacteria, o__Pseudomonadales, , ,	8	0	0	0	0	0	0	0	0	0	0	0	0	0	0	0	0	0	0	0	0	0	0	0	1	1	0	0	0	0	0	2	3	0	0	0	0	0	0	0	0	0	0	0	1	GTGTCAGCCGCCGCGGTAATACAGAGGGTGCGAGCGTTAATCGGATTTACTGGGCGTAAAGCGTGCGTAGGTGGTTCGTTAAGTTGGATGTGAAAGCCCCGGGCTCAACCTGGGAACTGCATCCAAAACTGGCGAGCTAGAGTATGGTAGA
f__Parachlamydiaceae, FS10000387:4:BNT40308-1625:1:1107:16020:3090 1:N:0:6	k__Bacteria, p__Chlamydiae, c__Chlamydiia, o__Chlamydiales, f__Parachlamydiaceae, g__, s__	13	0	0	0	0	0	4	0	0	0	0	0	0	0	0	0	0	9	0	0	0	0	0	0	0	0	0	0	0	0	0	0	0	0	0	0	0	0	0	0	0	0	0	0	0	GCCGCCGCGGTAATACGGAGGGTGCAAGCATTAATCGGAATTATTGGGCGTAAAGGGCGCGTAGGCGGAGGCGTAAGTCAGATGTGAAATCCCGGGGCTCAACCTCGGAACAGCATTTGAAACTGCGCCCCTTGAGGGTAGGCGGAG
f__Acetobacteraceae, FS10000387:3:BNT40308-2320:1:1101:12360:2240 1:N:0:19	k__Bacteria, p__Proteobacteria, c__Alphaproteobacteria, o__Rhodospirillales, f__Acetobacteraceae, g__, s__	14	0	0	0	0	0	0	0	0	0	0	0	0	0	0	0	0	0	0	0	0	0	0	0	0	0	0	0	0	0	2	0	0	0	0	0	12	0	0	0	0	0	0	0	0	GTGCCAGCAGCCGCGGTAATACGAAGGGGGCTAGCGTTACTCGGAATGACTGGGCGTAAAGGGCGCGTAGGCTGTTTGGATCGTTAGGCGTGAAATTCCTGGGCTCAACCTGGGGGCTGCGCTTAATACATCCAGACTGGAGTGTGGAAGA
f__Rhodospirillaceae, FS10000387:3:BNT40308-2320:1:1102:12710:4060 1:N:0:11	k__Bacteria, p__Proteobacteria, c__Alphaproteobacteria, o__Rhodospirillales, f__Rhodospirillaceae, g__, s__	16	0	0	0	0	0	0	0	0	0	0	0	0	0	0	0	0	0	0	0	0	0	0	1	0	0	0	0	0	0	0	0	0	14	0	0	0	0	0	0	1	0	0	0	0	GTGCCAGCAGCCGCGGTAATACGGAGGGGGCTAGCGTTGTTCGGAATTACTGGGCGTAAAGGGCGCGTAGGCGGTGCGATAAGTCAGGCGTGAAAGGCCCGGGCTCAACCCGGGGACTGCGCTTGATACTGTTGCGCTGTGAGTCCGGGAA
g__Deinococcus, FS10000387:3:BNT40308-2320:1:1104:11000:2630 1:N:0:2	k__Bacteria, p__[Thermi], c__Deinococci, o__Deinococcales, f__Deinococcaceae, g__Deinococcus, s__	9	0	0	0	0	0	0	0	0	0	0	0	0	0	0	0	0	0	0	0	0	0	0	0	0	0	9	0	0	0	0	0	0	0	0	0	0	0	0	0	0	0	0	0	0	GTGTCAGCAGCCGCGGTAATACGGAGGGTGCAAGCGTTACCCGGAATCACTGGGCGTAAAGGGCGTGTAGGCGGAAACGTAAGTCTGGCTTTAAAGACCAACGCTCAACGTTGGGAGTGGGCTGGATACTGTGTTTCTGGACCTCTGGAGA
o__Pseudomonadales, FS10000387:3:BNT40308-2320:1:1104:7080:3230 1:N:0:15	k__Bacteria, p__Proteobacteria, c__Gammaproteobacteria, o__Pseudomonadales, , ,	42	0	0	0	0	0	0	0	0	0	0	0	0	0	0	0	0	0	0	0	0	0	0	1	1	5	1	0	0	7	3	9	6	3	0	3	2	1	0	0	0	0	0	0	0	GTGTCAGCTGCCGCGGTAATACAGAGGGTGCAAGCGTTAATCGGAATTACTGGGCGTAAAGCGCACGTAGGTGGTTCGTTAAGTTGGATGTGAAAGCCCCGGGCTCAACCTGGGAACTGCATCCAAAACTGGCAAGCTAGAGTTTGGTAGA
s__wittichii, FS10000387:3:BNT40308-2320:1:1105:15210:3980 1:N:0:16	k__Bacteria, p__Proteobacteria, c__Alphaproteobacteria, o__Sphingomonadales, f__Sphingomonadaceae, g__Sphingomonas, s__wittichii	11	0	0	0	0	0	0	0	0	0	0	0	0	0	0	0	0	0	0	0	0	0	0	0	0	0	0	0	1	0	0	0	0	0	10	0	0	0	0	0	0	0	0	0	0	GTGTCAGCCGCCGCGGTAATACGGAGGGGGCTAGCGTTGTTCGGAATTACTGGGCGTAAAGCGTACGTAGGCGGTTTTGTAAGTTAGAGGTGAAAGCCTGGAGCTCAACTCCAGAATTGCCTTTAAGACTGCATCACTTGAACGTCGGAGA
c__Betaproteobacteria, FS10000387:3:BNT40308-2320:1:1105:1850:1630 1:N:0:16	k__Bacteria, p__Proteobacteria, c__Betaproteobacteria, , , ,	50	0	0	0	0	0	0	0	0	0	0	0	0	0	0	0	0	0	0	0	0	0	0	1	0	0	0	0	7	0	0	0	0	0	37	0	0	1	0	3	0	0	0	1	0	GGGGCAGCCGCCGCGGTAATACGTAGGGTGCAAGCGTTAATCGGAATTACTGGGCGTAAAGCGTGCGCAGGCGGTTATGTAAGACAGAGGTGAAATCCCCGGGCTCAACCTGGGAACTGCCTTTGTGACTGCATGACTAGAGTACGGTAGA
f__Moraxellaceae, FS10000387:3:BNT40308-2320:1:1105:4780:2040 1:N:0:1	k__Bacteria, p__Proteobacteria, c__Gammaproteobacteria, o__Pseudomonadales, f__Moraxellaceae, ,	11	0	0	0	0	0	0	0	0	0	0	0	0	0	0	0	0	0	0	0	0	0	0	0	0	0	0	9	0	0	0	0	0	0	0	1	0	0	1	0	0	0	0	0	0	GTGTCAGCCGCCGCGGTAATACAGAGGGTGCGAGCGTTAATCGGATTTACTGGGCGTAAAGCGTGCGTAGGCGGCTTTTTAAGTCGGATGTGAAATCCCCGAGCTTAACTTGGGAATTGTATTCGATACTGGTCAGCTAGAGTATGGGAGA
c__Betaproteobacteria, FS10000387:3:BNT40308-2320:1:1102:5990:1240 1:N:0:16	k__Bacteria, p__Proteobacteria, c__Betaproteobacteria, , , ,	98	0	0	0	0	0	0	0	0	0	0	0	0	0	0	0	0	0	0	0	0	0	0	1	0	0	0	0	22	0	0	0	0	0	67	0	0	1	2	3	0	0	2	0	0	GTGTCAGCAGCCGCGGTAATACGTAGGGTGCAAGCGTTAATCGGAATTACTGGGCGTAAAGCGTGCGCAGGCGGTTATGTAAGACAGAGGTGAAATCCCCGGGCTCAACCTGGGAACTGCCTTTGTGACTGCTTGACTAGAGTTCGGTAGA
f__Legionellaceae, FS10000387:3:BNT40308-2320:1:1105:14570:1550 1:N:0:1	k__Bacteria, p__Proteobacteria, c__Gammaproteobacteria, o__Legionellales, f__Legionellaceae, g__, s__	10	0	0	0	0	0	0	0	0	0	0	0	0	0	0	0	0	0	0	0	0	0	0	0	0	0	0	10	0	0	0	0	0	0	0	0	0	0	0	0	0	0	0	0	0	GTGTCAGCAGCCGCGGTAATACGGAGGGTGCAAGCGTTAATCGGAATTACTGGGCGTAAAGGGTTCGTAGGTGGTAGATTAAGTTAACTGTGAAATCCCTGGGCTTAACCTGGGGCGGTCAGTTAAGACTGGTTTACTTGAGTATGGGAGA
f__Rickettsiaceae, FS10000387:3:BNT40308-2320:1:1106:13880:3950 1:N:0:5	k__Bacteria, p__Proteobacteria, c__Alphaproteobacteria, o__Rickettsiales, f__Rickettsiaceae, g__, s__	9	0	0	0	0	0	0	0	0	0	0	0	0	0	0	0	0	0	0	0	0	0	0	6	0	0	0	0	0	0	0	0	0	0	0	0	0	0	0	3	0	0	0	0	0	GTGTCAGCAGCCGCGGTAAGACGGAGGGGGCTAGCGTTGTTCGGAATTACTGGGCGTAAAGAGCGTGTAGGTGGTTTAACAAGTTGGGAGTGAAAGCCCGGGGCTTAACCTCGGAATTGCTTTCAAAACTGTTAGGCTAGAGTGTAGTAGG
f__Enterobacteriaceae, FS10000387:3:BNT40308-2320:1:1112:11460:2590 1:N:0:14	k__Bacteria, p__Proteobacteria, c__Gammaproteobacteria, o__Enterobacteriales, f__Enterobacteriaceae, ,	17	0	0	0	0	0	0	0	0	0	0	0	0	0	0	0	0	0	0	0	0	0	0	2	0	0	0	0	0	0	1	0	0	0	0	0	0	1	0	1	1	2	5	2	2	GTGTCAGCAGCCGCGGTAATACGGAGGGTGCAAGCGTTAATCGGAATTACTGGGCGTAAAGCGCACGCAGGCGGTTTGTTAAGTCAGATGTGAAATTCCCGTGCTTAACTTGTGTACTGCTTTTGAAACTGGCAAGCTAGAGTCTTGTAGA
f__Rhodospirillaceae, FS10000387:3:BNT40308-2320:1:1112:1800:3700 1:N:0:5	k__Bacteria, p__Proteobacteria, c__Alphaproteobacteria, o__Rhodospirillales, f__Rhodospirillaceae, g__, s__	17	0	0	0	0	0	0	0	0	0	0	0	0	0	0	0	0	0	0	0	0	0	0	1	0	3	1	0	0	0	0	1	3	8	0	0	0	0	0	0	0	0	0	0	0	GTGTCAGCAGCCGCGGTAAGACGAAGGGGGCTAGCGTTGTTCGGAATTACTGGGCGTAAAGCGAGTGTAGGCGGTTGCCCAAGTTGGATGTGAAAGCCTTGAGCTCAACTCAAGAAATGCATTCAGGACTGGGTAACTAGAGTACCGGAGA
g__Wautersiella, FS10000387:3:BNT40308-2320:1:1116:4220:2050 1:N:0:17	k__Bacteria, p__Bacteroidetes, c__Flavobacteriia, o__Flavobacteriales, f__[Weeksellaceae], g__Wautersiella, s__	6	0	0	0	0	0	0	0	0	0	0	0	0	0	0	0	0	0	0	0	0	0	0	0	0	0	0	0	0	0	0	0	0	0	0	0	0	0	2	0	4	0	0	0	0	GTGTCAGCAGCCGCGGTAATACGGAGGGTGCAAGCGTTATCCGGATTTATTGGGTTTAAAGGGTCCGTAGGCGGATTAATAAGTCAGTGGTGAAAGCCCGCAGCTTAACTGTGGAACTGCCATTGATACTGTTAGTCTTGAGTATATTTGA
s__debontii, FS10000387:4:BNT40308-1625:1:1102:3610:2800 1:N:0:6	k__Bacteria, p__Verrucomicrobia, c__Verrucomicrobiae, o__Verrucomicrobiales, f__Verrucomicrobiaceae, g__Prosthecobacter, s__debontii	17	0	0	0	0	0	17	0	0	0	0	0	0	0	0	0	0	0	0	0	0	0	0	0	0	0	0	0	0	0	0	0	0	0	0	0	0	0	0	0	0	0	0	0	0	GCCGCCGCGGTAATACGAAGGTCCCAAGCGTTGTTCGGAATCACTGGGCGTAAAGGGTGCGTAGGTGGCGTGGTAAGTCAGATGTGAAAGCCCGGGGCTCAACCTCGGAATTGCATCCGATACTGCCGTGCTGGAGTACTGAAGAGG
g__Acidovorax, FS10000387:4:BNT40308-1625:1:1104:11830:2400 1:N:0:6	k__Bacteria, p__Proteobacteria, c__Betaproteobacteria, o__Burkholderiales, f__Comamonadaceae, g__Acidovorax, s__	20	0	0	0	0	0	19	0	0	0	0	0	0	0	0	0	0	1	0	0	0	0	0	0	0	0	0	0	0	0	0	0	0	0	0	0	0	0	0	0	0	0	0	0	0	GCCGCCGCGGTAATACGTAGGGTGCGAGCGTTAATCGGAATTACTGGGCGTAAAGCGTGCGCAGGCGGTGATGTAAGACAGATGTGAAATCCCCGGGCTTAACCTGGGAACTGCACTTGTGACTGCACAGCTAGAGTACGGCAGAGG
o__Rickettsiales, FS10000387:4:BNT40308-1625:1:1107:15690:3760 1:N:0:6	k__Bacteria, p__Proteobacteria, c__Alphaproteobacteria, o__Rickettsiales, f__, g__, s__	9	0	0	0	0	0	8	0	0	0	0	1	0	0	0	0	0	0	0	0	0	0	0	0	0	0	0	0	0	0	0	0	0	0	0	0	0	0	0	0	0	0	0	0	0	GCCGCTGCGGTAATACAGAGAGGGCAAGCGTTGTCCGGAATGACTGGGCGTAAAGCGCGCGCAGGCGGTCTTTTAAGTTGGATGTGAAATCCCCGGGCTTAACCTGGGAACTGCATTCGATACTGGGAGACTAGAGGCCGAGAGAGG
g__Bdellovibrio, FS10000387:4:BNT40308-1625:1:1114:2320:2980 1:N:0:6	k__Bacteria, p__Proteobacteria, c__Deltaproteobacteria, o__Bdellovibrionales, f__Bdellovibrionaceae, g__Bdellovibrio, s__	6	0	0	0	0	0	1	0	0	0	0	0	0	0	0	0	0	5	0	0	0	0	0	0	0	0	0	0	0	0	0	0	0	0	0	0	0	0	0	0	0	0	0	0	0	GCCGCCGCGGTAAGACGAGGGATCCTAGCGTTGTTCGGAATTATTGGGCGTAAAGCGGGTGTAGGCGGACTAATAAGTCAGGTGTGAAATCCCAGGGCTCAACCCTGGAAGTGCACTTGATACTGCTAGTCTTGAATGTGGTAGAGG
g__Halobacterium, FS10000387:3:BNT40308-2320:1:1102:2980:1740 1:N:0:1	k__Archaea, p__Euryarchaeota, c__Halobacteria, o__Halobacteriales, f__Halobacteriaceae, g__Halobacterium, s__	9	0	0	0	0	0	0	0	0	0	0	0	0	0	0	0	0	0	0	0	0	0	0	0	0	0	0	9	0	0	0	0	0	0	0	0	0	0	0	0	0	0	0	0	0	GTGTCAGCCGCCGCGGTAATACCGGCAGTTCAAGTGATGGCCAATTTTATTGGGCCTAAAGCGTCCGTAGCTGGCCGTGCAAGTCCGTTGGGAAATCTGCTCGCTTAACGAGCAGGCGTCCAGCGGAAACTGTACGGCTTGGGACCGGAA
g__Gemmata, FS10000387:3:BNT40308-2320:1:1102:6050:2280 1:N:0:11	k__Bacteria, p__Planctomycetes, c__Planctomycetia, o__Gemmatales, f__Gemmataceae, g__Gemmata, s__	9	0	0	0	0	0	0	0	0	0	0	0	0	0	0	0	0	0	0	0	0	0	0	0	0	0	0	0	0	0	0	0	0	9	0	0	0	0	0	0	0	0	0	0	0	GTGTCAGCAGCCGCGGTAAGACGAACCGTGCGAACGTTGTTCGGAATCACTGGGCTTAAAGGGCGCGTAGGCGGGCTGGCAAGTCCGGGGTGAAATCCACCGGCTCAACCGGTGGACGGCCTCGGATACTGCCGGCCTGGAGGCGGGTAGG
g__Planctomyces, FS10000387:3:BNT40308-2320:1:1102:7770:1950 1:N:0:11	k__Bacteria, p__Planctomycetes, c__Planctomycetia, o__Planctomycetales, f__Planctomycetaceae, g__Planctomyces, s__	7	0	0	0	0	0	0	0	0	0	0	0	0	0	0	0	0	0	0	0	0	0	0	0	0	0	0	0	0	0	0	0	0	7	0	0	0	0	0	0	0	0	0	0	0	GTGTCAGCCGCCGCGGTAATACGAACTGTGCAAACGTTATTCGGAATCACTGGGCTTACAGGGTGCGTAGGCGGTCTGTTAAGTAGGGTGTGAAAGCCCCCGGCTCAACCGGGGAATTGCGCCCTAAACTGGCGGACTGGAGTGAGATAGG
g__Pseudomonas, FS10000387:3:BNT40308-2320:1:1103:10160:3590 1:N:0:3	k__Bacteria, p__Proteobacteria, c__Gammaproteobacteria, o__Pseudomonadales, f__Pseudomonadaceae, g__Pseudomonas, s__	24	0	0	0	0	0	0	0	0	0	0	0	0	0	0	0	0	0	0	0	0	0	0	2	0	4	2	0	1	3	0	2	1	1	1	1	2	1	1	0	2	0	0	0	0	GTGTCAGCAGCCGCGGTAATACAGAGGGTGCAAGCGTTAATCGGATTTACTGGGCGTAAAGCGTACGGAGGCGGCTTTTTAAGTCAGATGTGAAATCCCCGAGCTTAACTTGGGAATTGCATTCGATACTGGCAAGCTAGAGTTTGGGAGA
g__Gemmata, FS10000387:3:BNT40308-2320:1:1103:4510:1710 1:N:0:19	k__Bacteria, p__Planctomycetes, c__Planctomycetia, o__Gemmatales, f__Gemmataceae, g__Gemmata, s__	5	0	0	0	0	0	0	0	0	0	0	0	0	0	0	0	0	0	0	0	0	0	0	0	0	0	0	0	0	0	0	0	0	0	0	0	5	0	0	0	0	0	0	0	0	GTGTCAGCAGCCGCGGTAAGACGAACCGTGCGAACGTTGTTCGGAATAACTGGGCTTAAAGGGAGCGTAGGCGGGCTGACAAGTCTGGGGTGAAATGCCGCGGCTCAACCGTGGAACTGCCTTAGATACTGTCGGCCTCGAGGGAGATAGG
o__Pseudomonadales, FS10000387:3:BNT40308-2320:1:1108:8830:3890 1:N:0:20	k__Bacteria, p__Proteobacteria, c__Gammaproteobacteria, o__Pseudomonadales, , ,	11	0	1	1	0	0	0	0	3	0	0	0	0	0	0	0	1	0	0	0	0	0	0	0	0	0	0	0	0	0	0	0	0	0	0	1	1	1	2	0	0	0	0	0	0	GTGTCAGCCGCCGCGGTAATACAGAGGGTGCAAGCGTTAATCGGAATTACTGGGCGTAAAGCGCGCGTAGGTGGTTCGTTAAGTTGAATGTGAAAGCCCCGGGCTCAACCTGGGAACTGCATCCAAAACTGGCGAGCTAGAGTAGGGCAGA
o__Pseudomonadales, FS10000387:3:BNT40308-2320:1:1108:9350:2360 1:N:0:3	k__Bacteria, p__Proteobacteria, c__Gammaproteobacteria, o__Pseudomonadales, , ,	20	0	0	0	0	0	0	0	0	0	0	0	0	0	0	0	0	0	0	0	0	0	0	0	0	7	2	0	1	1	0	4	1	0	0	0	0	0	4	0	0	0	0	0	0	GTGTCAGCCGCCGCGGTAATACAGAGGGTGCGAGCGTTAATCGGATTTACTGGGCGTAAAGCGTGCGTAGGCGGCTGATTAAGTCGGATGTGAAAGCCCCGGGCTCAACCTGGGAACTGCATCCAAAACTGGCGAGCTAGAGTATGGTAGA
g__Deinococcus, FS10000387:4:BNT40308-1625:1:1103:3820:1130 1:N:0:8	k__Bacteria, p__[Thermi], c__Deinococci, o__Deinococcales, f__Deinococcaceae, g__Deinococcus, s__	5	0	0	0	0	0	0	0	5	0	0	0	0	0	0	0	0	0	0	0	0	0	0	0	0	0	0	0	0	0	0	0	0	0	0	0	0	0	0	0	0	0	0	0	0	GCAGCCGCGGTAATACGGAGGGTGCAAGCGTTACCCGGAATCACTGGGCGTAAAGGGCGTGTAGGCGGATCATTAAGTCTGATTTTAAAGACCGAGGCTCAACCTCGGAAATGGATTGGATACTGGTGATCTTGACCTCTGGAGAGG
g__Flavobacterium, FS10000387:4:BNT40308-1625:1:1110:9340:2580 1:N:0:6	k__Bacteria, p__Bacteroidetes, c__Flavobacteriia, o__Flavobacteriales, f__Flavobacteriaceae, g__Flavobacterium, s__	5	0	0	0	0	0	5	0	0	0	0	0	0	0	0	0	0	0	0	0	0	0	0	0	0	0	0	0	0	0	0	0	0	0	0	0	0	0	0	0	0	0	0	0	0	GCAGCCGCGGTAATACGGAGGATCCAAGCGTTATCCGGAATCATTGGGTTTAAAGGGTCCGTAGGCGGTCTTATAAGTCAGTGGTGAAATCTGGTCGCTCAACGATCAAACTGCCATTGATACTGTAGGACTTGAATTACTGTGAAG
c__Chloroplast, FS10000387:3:BNT40308-2320:1:1105:6720:3360 1:N:0:19	k__Bacteria, p__Cyanobacteria, c__Chloroplast, o__, f__, g__, s__	4	0	0	0	0	0	0	0	0	0	0	0	0	0	0	0	0	0	0	0	0	0	0	0	0	0	0	0	0	0	0	0	0	0	0	0	4	0	0	0	0	0	0	0	0	GTGTCAGCAGCCGCGGTAATACGGAGGATGCAAGCGTTATCCGGAATCACTGGGCGTAAAGCGTCTGTAGGTTGCTCAGTAAGTCTGCTGTTAAAGATTGGAGCTCAACCCCAAAGCAGCAGTGGAAACTGCTAGGCTAGAGTATGGTAAG
o__Thiohalorhabdales, FS10000387:3:BNT40308-2320:1:1105:9740:2050 1:N:0:2	k__Bacteria, p__Proteobacteria, c__Gammaproteobacteria, o__Thiohalorhabdales, f__, g__, s__	9	0	0	0	0	0	0	0	0	0	0	0	0	0	0	0	0	0	0	0	0	0	0	0	0	0	9	0	0	0	0	0	0	0	0	0	0	0	0	0	0	0	0	0	0	GTGTCAGCAGCCGCGGTAATACGGAGGGTGCAAGCGTTAATCGGAATTACTGGGCGTAAAGCGCACGCAGGCGGTTTGTTAAGTCAGATGTGAAAGCCCTGGGCTTAACCTAGGAGTTGCATTTGAAACTGACAAGCTAGAGTACTGTAGA
f__[Chromatiaceae], FS10000387:3:BNT40308-2320:1:1107:12650:1040 1:N:0:5	k__Bacteria, p__Proteobacteria, c__Gammaproteobacteria, o__Alteromonadales, f__[Chromatiaceae], g__, s__	32	0	0	0	0	0	0	0	0	0	0	0	0	0	0	0	0	0	0	0	0	0	0	4	0	2	2	0	0	0	1	1	0	0	0	1	0	0	0	0	1	3	11	3	3	GTGTCAGCAGCCGCGGTAATACAGAGGGTGCAAGCGTTAATCGGAATTACTGGGCGTAAAGCGCACGCAGGCGGTTCGTTAAGTCAGATGTGAAATCCCCGAGCTCAACTTGGGAACTGCATTTAAAACTGGCAAGCTAGAGTTTTGTAGA
f__Simkaniaceae, FS10000387:3:BNT40308-2320:1:1108:12430:1350 1:N:0:15	k__Bacteria, p__Chlamydiae, c__Chlamydiia, o__Chlamydiales, f__Simkaniaceae, g__, s__	4	0	0	0	0	0	0	0	0	0	0	0	0	0	0	0	0	0	0	0	0	0	0	0	0	0	0	0	0	4	0	0	0	0	0	0	0	0	0	0	0	0	0	0	0	GTGTCAGCAGCCGCGGTAATACGGAGGGTGCAAGCATTAATCGGATTTACTGGGCGTAAAGGGCGCGTAGGCGGGTAAACAAGTCTCATGTGAAATTCCGGAGCTCAACTCCGGAGCTGCATGGGAAACTGTATATCTATAGAGGGATGG
g__Planctomyces, FS10000387:3:BNT40308-2320:1:1110:2860:2030 1:N:0:21	k__Bacteria, p__Planctomycetes, c__Planctomycetia, o__Planctomycetales, f__Planctomycetaceae, g__Planctomyces, s__	11	0	0	0	0	0	0	0	0	0	0	0	0	0	0	0	0	0	0	0	0	0	0	0	0	0	0	0	0	0	0	0	0	0	4	0	0	0	7	0	0	0	0	0	0	GTGTCAGCAGCCGCGGTAATACGAACTGTGCGAACGTTATTCGGAATCACTGGGCTTACAGGGTGCGTAGGCGGCTATTCAGGTCAGGTGTGAAAGCCCTCGGCTCAACCGAGGAACTGCGCTTGAAACCGGATGGCTCGAGTCAACTAGA
f__Isosphaeraceae, FS10000387:3:BNT40308-2320:1:1113:2720:2720 1:N:0:21	k__Bacteria, p__Planctomycetes, c__Planctomycetia, o__Gemmatales, f__Isosphaeraceae, g__, s__	4	0	0	0	0	0	0	0	0	0	0	0	0	0	0	0	0	0	0	0	0	0	0	0	0	0	0	0	0	0	0	0	0	0	4	0	0	0	0	0	0	0	0	0	0	GTGTCAGCAGCCGCGGTAAGACGAACCGTGCGAACGTTATTCGGAATCACTGGGCTTAAAGCGCGTGTAGGCGGCCCGGCACGTCATTGGCTGAAATCCCCTAGCTCAACTAGGGAAGTGGCCGTGATACGACCGGGCTGGAGGGGGGTAG
s__formigenes, FS10000387:3:BNT40308-2320:1:1115:13660:2800 1:N:0:11	k__Bacteria, p__Proteobacteria, c__Betaproteobacteria, o__Burkholderiales, f__Oxalobacteraceae, g__Oxalobacter, s__formigenes	25	0	0	0	0	0	0	0	0	0	0	0	0	0	0	0	0	0	0	0	0	0	0	8	0	1	1	1	0	0	0	0	0	1	3	1	0	0	0	7	1	0	0	0	1	GTGTCAGCAGCCGCGGTAATACGTAGGGTGCAAGCGTTAATCGGAATTACTGGGCGTAAAGCGTACGCAGGCGGTTATGTAAGACAGATGTGAAATCCCCGAGCTCAACCTGGGAACTGCATTTGTGACTGCTTAGCTAGAGTTCGGCAGA
f__Isosphaeraceae, FS10000387:3:BNT40308-2320:1:1115:2640:2090 1:N:0:20	k__Bacteria, p__Planctomycetes, c__Planctomycetia, o__Gemmatales, f__Isosphaeraceae, g__, s__	10	0	0	0	0	0	0	0	0	0	0	0	0	0	0	0	0	0	0	0	0	0	0	0	0	0	0	0	0	0	0	0	0	0	0	10	0	0	0	0	0	0	0	0	0	GTGTCAGCAGCCGCGGTAAGACGAACCGTGCGAACGTTATTCGGAATCACTGGGCTTAAAGCGCGTGTAGGCGGACGGGCAAGTCGGTAACTGAAAGCCCCCGGCTCAACCGGGGAAGTGGTGCCGATACGACCCGTCTGGAGGGACGTAG
g__Perlucidibaca, FS10000387:4:BNT40308-1625:1:1102:11380:1410 1:N:0:6	k__Bacteria, p__Proteobacteria, c__Gammaproteobacteria, o__Pseudomonadales, f__Moraxellaceae, g__Perlucidibaca, s__	8	0	0	0	0	0	8	0	0	0	0	0	0	0	0	0	0	0	0	0	0	0	0	0	0	0	0	0	0	0	0	0	0	0	0	0	0	0	0	0	0	0	0	0	0	GCAGCCGCGGTAATACGTAGGGTGCGAGCGTTAATCGGAATTACTGGGCGTAAAGCGCGCGTAGGCGGTTGTATAAGTTGGAGGTGAAATCCCCGGGCTCAACCTGGGAATTGCCTTCAAAACTGTACGGCTAGAGTGTGGGAGAGG
o__Rickettsiales, FS10000387:4:BNT40308-1625:1:1102:16010:2800 1:N:0:18	k__Bacteria, p__Proteobacteria, c__Alphaproteobacteria, o__Rickettsiales, f__, g__, s__	6	0	0	0	0	0	0	0	0	0	0	0	0	0	0	0	0	6	0	0	0	0	0	0	0	0	0	0	0	0	0	0	0	0	0	0	0	0	0	0	0	0	0	0	0	GCCGCCGCGGTAAGACGGAGGGGGCTAGCGTTGTTCGGAATGACTGGGCGTAAAGGGCGCGTAGGCGGTTTTTTAAGTGAGGCGTGAAAGCCCTGGGCTTAACCCAGGAGGTGCGCTTCATACTGAAAAGCTTGAGTGCGAGAGAGG
g__Hyphomicrobium, FS10000387:4:BNT40308-1625:1:1103:8660:2370 1:N:0:18	k__Bacteria, p__Proteobacteria, c__Alphaproteobacteria, o__Rhizobiales, f__Hyphomicrobiaceae, g__Hyphomicrobium, s__	13	0	0	0	0	0	5	0	0	0	0	0	0	0	0	0	0	8	0	0	0	0	0	0	0	0	0	0	0	0	0	0	0	0	0	0	0	0	0	0	0	0	0	0	0	GCCGACGCGGTAATACGAAGGGGACTAGCGTTGTTCGGAATCACTGGGCGTAAAGCGCACGTAGGCGGATATGTCAGTCAGGGGTGAAATCCCGGGGCTCAACCTCGGAACTGCCCTTGATACAGCATGTCTTGAGTCCGATAGAGG
f__Rhodospirillaceae, FS10000387:4:BNT40308-1625:1:1106:10210:3040 1:N:0:12	k__Bacteria, p__Proteobacteria, c__Alphaproteobacteria, o__Rhodospirillales, f__Rhodospirillaceae, g__, s__	9	0	0	0	0	0	0	0	0	0	0	0	9	0	0	0	0	0	0	0	0	0	0	0	0	0	0	0	0	0	0	0	0	0	0	0	0	0	0	0	0	0	0	0	0	GCCGCCGCGGTAAGACGAAGGGGGCTAGCGTTGTTCGGAATTACTGGGCGTAAAGCGAGTGTAGGTGGTTGTTCAAGTTGGATGTGAAAGCCTTGAGCTCAACTCAAGAAATGCATTCAGGACTGAGCGACTAGAGGACCGGAGAGG
g__Halorubrum, FS10000387:4:BNT40308-1625:1:1110:6710:1710 1:N:0:22	k__Archaea, p__Euryarchaeota, c__Halobacteria, o__Halobacteriales, f__Halobacteriaceae, g__Halorubrum, s__	4	0	0	0	0	0	0	0	0	0	0	0	0	0	0	0	0	0	0	0	0	4	0	0	0	0	0	0	0	0	0	0	0	0	0	0	0	0	0	0	0	0	0	0	0	GCAGCCGCGGTAATACCGGCAGCCCGAGTGATGGCCGATTTTATTGGGCCTAAAGCGTCCGTAGCTGGCCGCACAAGTCTATCGGGAAATCTACCCGCTCAACGGGTAGGCGCCCGGTGGAAACTGTGTGGCTTGGGACCGGAAGG
f__Isosphaeraceae, FS10000387:4:BNT40308-1625:1:1111:7350:3790 1:N:0:6	k__Bacteria, p__Planctomycetes, c__Planctomycetia, o__Gemmatales, f__Isosphaeraceae, g__, s__	6	0	0	0	0	0	6	0	0	0	0	0	0	0	0	0	0	0	0	0	0	0	0	0	0	0	0	0	0	0	0	0	0	0	0	0	0	0	0	0	0	0	0	0	0	GCCGCCGCGGTAAGACGAACCGTGCGAACGTTATTCGGAATCATTGGGCTTAAAGCGCGTGTAGGCGGATGGGAACGTCGATGTTAAAAGCCCCCGGCTCAACCGGGGAACCGGCGTCGAAACGACCCGTCTGGAGGGGCATAGGGG
g__Pandoraea, FS10000387:3:BNT40308-2320:1:1101:10550:1670 1:N:0:27	k__Bacteria, p__Proteobacteria, c__Betaproteobacteria, o__Burkholderiales, f__Burkholderiaceae, g__Pandoraea, s__	3	0	0	0	0	0	0	0	0	0	0	0	0	0	0	0	0	0	0	0	0	0	0	0	0	0	0	0	0	0	0	0	0	0	0	0	0	0	0	0	0	0	0	0	3	GTGCCAGCCGCCGCGGTAATACGTAGGGTGCGAGCGTTAATCGGAATTACTGGGCGTAAAGCGTGCGCAGGCGGTTTTGTAAGACGGATGTGAAATCCCCGGGCTCAACCTGGGAACTGCATTCGTGACTGCAAGGCTAGAGTACTGTAGA
c__Gammaproteobacteria, FS10000387:3:BNT40308-2320:1:1101:12550:2190 1:N:0:1	k__Bacteria, p__Proteobacteria, c__Gammaproteobacteria, , , ,	5	0	0	0	0	0	0	0	0	0	0	0	0	0	0	0	0	0	0	0	0	0	0	0	0	0	0	5	0	0	0	0	0	0	0	0	0	0	0	0	0	0	0	0	0	GTGTCAGCCGCCGCGGTAATACGGAGGGTCCGAGCGTTAATCGGAATTACTGGGCGTAAAGCGTGCGCAGGCGGTTTGTTAAGCGAGATGTGAAAGCCCTGGGCTCAACCTAGGAATAGCATTTCGAACTGGCGAGCTAGAGTATGGTAGA
f__Neisseriaceae, FS10000387:3:BNT40308-2320:1:1101:8420:2510 1:N:0:21	k__Bacteria, p__Proteobacteria, c__Betaproteobacteria, o__Neisseriales, f__Neisseriaceae, g__, s__	8	0	0	0	0	0	0	0	0	0	0	0	0	0	0	0	0	0	0	0	0	0	0	0	0	0	0	0	0	0	0	0	0	0	6	0	0	0	0	2	0	0	0	0	0	GTGTCAGCAGCCGCGGTAATACGTAGGGTCCAAGCGTTAATCGGAATTACTGGGCGTAAAGGGTGCGCAGGTGGTTACGTAAGTCTGATATAAAATCCCCGGGCTCAACCTGGGAACTGCATTGGAGACTACGTGACTAGAGTGTGGCAGA
g__Fimbriimonas, FS10000387:3:BNT40308-2320:1:1102:1090:3010 1:N:0:21	k__Bacteria, p__Armatimonadetes, c__[Fimbriimonadia], o__[Fimbriimonadales], f__[Fimbriimonadaceae], g__Fimbriimonas, s__	3	0	0	0	0	0	0	0	0	0	0	0	0	0	0	0	0	0	0	0	0	0	0	0	0	0	0	0	0	0	0	0	0	0	3	0	0	0	0	0	0	0	0	0	0	GTGTCAGCAGCCGCGGTAAGACGTAGGGTGCAAGCGTTGTCCGGATTTACTGGGCGTAAAGAGCGCGTAGGCGGTCTGTTAAGTGTGAAGTGAAATCTCGGGGCTCAACCCTGAAACTGCTTCGCATACTGGCAGGCTGGAGGAATGCAGA
f__auto67_4W, FS10000387:3:BNT40308-2320:1:1103:6170:2770 1:N:0:11	k__Bacteria, p__Verrucomicrobia, c__[Pedosphaerae], o__[Pedosphaerales], f__auto67_4W, g__, s__	3	0	0	0	0	0	0	0	0	0	0	0	0	0	0	0	0	0	0	0	0	0	0	0	0	0	0	0	0	0	0	0	0	3	0	0	0	0	0	0	0	0	0	0	0	GTGTCAGCAGCCGCGGTAATACAGAGGTCCCAAGCGTTGTTCGGATTCACTGGGCGTAAAGGGTGCGTAGGCGGTCGGGTAAGTCTGACGTGAAATCTCCGGGCCCAACCCGGAAACTGCGTTGGAAACTACCTGGCTCGAGGAATGGAGG
f__Sphingomonadaceae, FS10000387:3:BNT40308-2320:1:1104:11870:1840 1:N:0:5	k__Bacteria, p__Proteobacteria, c__Alphaproteobacteria, o__Sphingomonadales, f__Sphingomonadaceae, g__, s__	11	0	0	0	0	0	0	0	0	0	0	0	0	0	0	0	0	0	0	0	0	0	0	8	0	0	1	0	0	0	0	0	0	0	2	0	0	0	0	0	0	0	0	0	0	GTGTCAGCAGCCGCGGTAATACGGAGGGAGCTAGCGTTGTTCGGAATTACTGGGCGTAAAGCGCACGTAGGCGGCTATTCAAGTCAGAGGTGAAATCCCGGAGCTCAACCCCGGAACTGCTTTTGAAACTAGTTAGCTAGAATCTTGGAGA
g__Dyadobacter, FS10000387:3:BNT40308-2320:1:1104:4620:2370 1:N:0:5	k__Bacteria, p__Bacteroidetes, c__Cytophagia, o__Cytophagales, f__Cytophagaceae, g__Dyadobacter, s__	5	0	0	0	0	0	0	0	0	0	0	0	0	0	0	0	0	0	0	0	0	0	0	2	0	0	0	1	0	0	0	0	1	0	0	1	0	0	0	0	0	0	0	0	0	GTGTCAGCCGCGGTAATACGGAGGGTGCGAGCGTTGTCCGGATTTATTGGGTTTAAAGGGTGCGTAGGTGGCTTTTTAAGTCAGTGGTGAAATACGGTTGCTCAACAATCGAGGTGCCATTGATACTGAAAAGCTTGAAATAATTGGAGG
f__Pseudomonadaceae, FS10000387:3:BNT40308-2320:1:1105:1570:3390 1:N:0:15	k__Bacteria, p__Proteobacteria, c__Gammaproteobacteria, o__Pseudomonadales, f__Pseudomonadaceae, ,	30	0	0	0	0	0	0	0	0	0	0	0	0	0	0	0	0	0	0	0	0	0	0	0	0	3	3	1	1	5	0	2	5	2	0	2	0	2	1	0	0	0	0	0	3	GTGTCAGCAGCCGCGGTAATACAGAGGGTGCAAGCGTTAATCGGAATTACTGGGCGTAAAGCGCACGGAGGCGGTTCGTTAAGTTAGATGTGAAATCCCCGGGCTCAACCTGGGAACTGCATCCAAAACTGGCAAGCTAGAGTTTGGTAGA
g__Pedobacter, FS10000387:3:BNT40308-2320:1:1106:11490:3020 1:N:0:3	k__Bacteria, p__Bacteroidetes, c__Sphingobacteriia, o__Sphingobacteriales, f__Sphingobacteriaceae, g__Pedobacter, s__	5	0	2	0	0	0	0	0	0	0	0	0	0	0	0	0	0	0	0	0	0	0	0	0	0	2	0	0	1	0	0	0	0	0	0	0	0	0	0	0	0	0	0	0	0	GTGCCAGCAGCGGTAATACGGAGGATCCGAGCGTTATCCGGATTTATTGGGTTTAAAGGGTGCGTAGGCGGCCTGTTAAGTCAGGGGTGAAAGACGGTGGCTCAACCATCGCAGTGCCCTTGATACTGACGGGCTTGAATTAACTAGAGG
g__Pedobacter, FS10000387:3:BNT40308-2320:1:1106:12630:1280 1:N:0:15	k__Bacteria, p__Bacteroidetes, c__Sphingobacteriia, o__Sphingobacteriales, f__Sphingobacteriaceae, g__Pedobacter, s__	8	0	0	0	0	0	4	0	0	0	0	0	0	0	0	0	0	0	0	0	0	0	0	0	0	0	0	0	0	1	0	1	0	0	0	0	0	2	0	0	0	0	0	0	0	GTGTCAGCCGCGGTAAGACGAAGGATGCAAGCGTTATCCGGATTCATTGGGTTTAAAGGGTGCGTAGGCGGCCTGTTAAGTCAGGGGTGAAAGACGGTAGCTCAACTATCGCAGTGCCCTTGATACTGATGGGCTTGAATGGACTAGAGGT
f__Comamonadaceae, FS10000387:3:BNT40308-2320:1:1106:12710:1570 1:N:0:21	k__Bacteria, p__Proteobacteria, c__Betaproteobacteria, o__Burkholderiales, f__Comamonadaceae, g__, s__	5	0	0	0	0	0	0	0	0	0	0	0	0	0	0	0	0	0	0	0	0	0	0	0	0	0	0	0	0	0	0	0	0	0	4	0	0	0	0	1	0	0	0	0	0	GTGTCAGCAGCCGCGGTAATACGTAGGGTGCGAGCGTTAATCGGAATTACTGGGCGTAAAGCGTGCGCAGGCGGTGATGTAAGACAGATGTGAAATCCCCGGGCTCAACCTGGGAACTGCATTTGTGACTGCTTTACTCGAGTTCGGCAGA
f__Rhodocyclaceae, FS10000387:3:BNT40308-2320:1:1106:12880:1910 1:N:0:21	k__Bacteria, p__Proteobacteria, c__Betaproteobacteria, o__Rhodocyclales, f__Rhodocyclaceae, g__, s__	3	0	0	0	0	0	0	0	0	0	0	0	0	0	0	0	0	0	0	0	0	0	0	0	0	0	0	0	0	0	0	0	0	0	3	0	0	0	0	0	0	0	0	0	0	GTGTCAGCAGCCGCGGTAATACGTAGGGTGCAAGCGTTAATCGGAATTACTGGGCGTAAAGCGCACGCAGGCGGTGATGTAAGACAGATGTGAAATCCCCGAGCTCAACCTGGGAACTGCATTTGTGACTGCTTTACTTGAGTTCGGCAGA
f__Pseudoalteromonadaceae, FS10000387:3:BNT40308-2320:1:1106:1870:3410 1:N:0:14	k__Bacteria, p__Proteobacteria, c__Gammaproteobacteria, o__Vibrionales, f__Pseudoalteromonadaceae, g__, s__	5	0	0	0	0	0	0	0	0	0	0	0	0	0	0	0	0	0	0	0	0	0	0	0	0	0	0	0	0	0	1	0	0	0	3	0	0	0	1	0	0	0	0	0	0	GTGCCAGCCGCGGTAATACGGAGGGTGCGAGCGTTAATCGGAATTACTGGGCGTAAAGCGCATGCAGGTGGTTTGTTAAGTCAGATGTGAAAGCCCTGGGCTTAACCTAGGAATAGCATTTGAAACTGACAAGCTAGAGTACTGTAGAGGG
f__Coxiellaceae, FS10000387:3:BNT40308-2320:1:1108:12150:2100 1:N:0:1	k__Bacteria, p__Proteobacteria, c__Gammaproteobacteria, o__Legionellales, f__Coxiellaceae, g__, s__	3	0	0	0	0	0	0	0	0	0	0	0	0	0	0	0	0	0	0	0	0	0	0	0	0	0	0	3	0	0	0	0	0	0	0	0	0	0	0	0	0	0	0	0	0	GTGTCAGCAGCCGCGTGTGTGAAGAAGGCCTGCGGGTTGTAAAGCACTTTCAGGGGGGAGGAAAGGCGCGTAAGCGTTTTGACGTTACCCCCAGAAGAAGCACCGGCTAACTCTGTGCCAGCAGCCGCGGTAATACAGAGGGTGCGAGCGT
c__Betaproteobacteria, FS10000387:3:BNT40308-2320:1:1109:6240:1230 1:N:0:21	k__Bacteria, p__Proteobacteria, c__Betaproteobacteria, , , ,	5	0	0	0	0	0	0	0	0	0	0	0	0	0	0	0	0	0	0	0	0	0	0	0	0	0	0	0	0	0	0	0	0	0	5	0	0	0	0	0	0	0	0	0	0	GTGTCAGCCTCCGCGGTATACGTAGGGTGCAAGCGTTAATCGGAATTACTGGGCGTAAAGCGTGCGCAGGCGGTTATGTAAGACAGAGGTGAAATCCCCGGGCTCAACCTGGGAACTGCCTTTGTGACTGCATGACTAGAGTACGGTAGAG
g__Emticicia, FS10000387:3:BNT40308-2320:1:1111:12410:2390 1:N:0:15	k__Bacteria, p__Bacteroidetes, c__Cytophagia, o__Cytophagales, f__Cytophagaceae, g__Emticicia, s__	3	0	0	0	0	0	0	0	0	0	0	0	0	0	0	0	0	0	0	0	0	0	0	0	0	0	0	0	0	3	0	0	0	0	0	0	0	0	0	0	0	0	0	0	0	GTGCCAGCCGCCGCGGTAATACAGAGGGTGGCGAGCGTTATCCGGATTTATTGGGTTTAAAGGGTGCGTAGGCGGCTGATTAAGTCAGCGGTGAAAGGTAGCAGCTTAACTGTTTTACATGCCGTTGATACTGGTTAGCTTGAGTTAACAT
o__Sphingobacteriales, FS10000387:3:BNT40308-2320:1:1111:15350:3990 1:N:0:5	k__Bacteria, p__Bacteroidetes, c__Sphingobacteriia, o__Sphingobacteriales, f__, g__, s__	13	0	0	0	0	0	0	0	0	0	0	0	0	0	0	0	0	0	0	0	0	0	0	2	1	2	2	0	0	0	0	2	0	1	1	1	0	0	0	0	0	0	0	0	1	GTGTCAGCAGCCGCGGTAAGACGAAGGATGCAAGCGTTATCCGGATTCATTGGGTTTAAAGGGTACGTAGGCGGACCTGTAAGTCAGTGGTGAAATCTCTCAGCTTAACTGAGAAACTGCTATTGATACTGCTAGTCTAGAGTTTAGATGA
o__Pseudomonadales, FS10000387:3:BNT40308-2320:1:1111:1870:1040 1:N:0:13	k__Bacteria, p__Proteobacteria, c__Gammaproteobacteria, o__Pseudomonadales, , ,	3	0	0	0	0	0	0	0	0	0	0	0	0	0	0	0	0	0	0	0	0	0	0	0	0	0	0	0	0	0	0	3	0	0	0	0	0	0	0	0	0	0	0	0	0	GTGTCAGCAGCCGCGGTAATACAGAGGGTGCAAGCGTTAATCGGAATTACTGGGCGTAAAGCGCGCGTAGGTGGTTCGTTAAGTTGGATGTGAAAGCCCCGGGCTCAACCTGGGAACTGCATCCAAAACTGGCGAGCTAGAATCTTGGAGA
f__Enterobacteriaceae, FS10000387:3:BNT40308-2320:1:1113:11390:3240 1:N:0:29	k__Bacteria, p__Proteobacteria, c__Gammaproteobacteria, o__Enterobacteriales, f__Enterobacteriaceae, ,	3	0	0	0	0	0	0	0	0	0	0	0	0	0	0	0	0	0	0	0	0	0	0	0	0	0	0	0	0	0	0	0	0	0	0	0	0	0	0	0	0	0	1	1	1	GTGTCAGCAGCCGCGGTAATACGGAGGGTGCAAGCGTTAATCGGAATTACTGGGCGTAAAGCGCACGCAGGCGGTTATTCAAGTCAGATGTGAAATCCCCGAGCTCAACCTGGGAACTGCTTTTGAAACTGCTAAGCTAGAGTTTTGTAGA
f__Enterobacteriaceae, FS10000387:3:BNT40308-2320:1:1115:14630:3370 1:N:0:29	k__Bacteria, p__Proteobacteria, c__Gammaproteobacteria, o__Enterobacteriales, f__Enterobacteriaceae, g__, s__	9	0	0	0	0	0	0	0	0	0	0	0	0	0	0	0	0	0	0	0	0	0	0	0	0	0	0	0	0	0	0	1	0	0	0	0	0	0	0	0	1	0	3	2	2	GTGTCAGCAGCCGCGGTAATACGAAGGATGCAAGCGTTAATCGGAATTACTGGGCGTAAAGCGCACGCAGGCGGTTTGTTAAGTCAGATGTGAAATCCCCCAGCTTAACTTAGGAACTGCTTTTGAAACTGCCAAGCTAGAGTCTTGTAGA
g__Bacillus, FS10000387:4:BNT40308-1625:1:1101:13740:2090 1:N:0:1	k__Bacteria, p__Firmicutes, c__Bacilli, o__Bacillales, f__Bacillaceae, g__Bacillus, s__	3	2	0	0	0	0	0	0	0	0	0	0	0	0	0	0	0	0	0	1	0	0	0	0	0	0	0	0	0	0	0	0	0	0	0	0	0	0	0	0	0	0	0	0	0	GCAGCGGTAATACGTAGGTGGCAAGCGTTGTCCGGAATTATTGGGCGTAAAGCGCGCGCAGGCGGTCTCTTAAGTCTGATGTGAAATCTCGCGGCTCAACCGCGAGCGGCCATTGGAAACTGGGAGGCTTGAGTGCAGAAGAGGAGA
o__Rhizobiales, FS10000387:4:BNT40308-1625:1:1101:8360:3690 1:N:0:18	k__Bacteria, p__Proteobacteria, c__Alphaproteobacteria, o__Rhizobiales, f__, g__, s__	5	0	0	0	0	0	0	0	0	0	0	0	0	0	0	0	0	5	0	0	0	0	0	0	0	0	0	0	0	0	0	0	0	0	0	0	0	0	0	0	0	0	0	0	0	GCCGCCGCGGTAATACGAAGGGGGCTAGCGTTGTTCGGAATCACTGGGCGTAAAGCGCACGTAGGCGGCTCGTTAAGTCAGAGGTGAAAGCCTGGAGCTCAACTCCAGAACTGCCTTTGATACTGGCGGGCTCGAGTATGGCAGAGG
g__Candidatus Rhabdochlamydia, FS10000387:4:BNT40308-1625:1:1102:9800:1400 1:N:0:18	k__Bacteria, p__Chlamydiae, c__Chlamydiia, o__Chlamydiales, f__Rhabdochlamydiaceae, g__Candidatus Rhabdochlamydia, s__	3	0	0	0	0	0	0	0	0	0	0	0	0	0	0	0	0	3	0	0	0	0	0	0	0	0	0	0	0	0	0	0	0	0	0	0	0	0	0	0	0	0	0	0	0	GCAGCCGCGGTAATACGGAGAGTGCAAGCATTAATCGGAATTATTGGGCGTAAAGGGCGCGTAGGCGGAATCGTAAGTCAGATGTGAAATTCTGAAGCTCAACTTCAGAGCTGCATTTGAAACTACGAATCTAGAGGGTTGACGGAG
o__Sphingobacteriales, FS10000387:4:BNT40308-1625:1:1105:5470:1790 1:N:0:6	k__Bacteria, p__Bacteroidetes, c__Sphingobacteriia, o__Sphingobacteriales, f__, g__, s__	7	0	0	0	0	0	7	0	0	0	0	0	0	0	0	0	0	0	0	0	0	0	0	0	0	0	0	0	0	0	0	0	0	0	0	0	0	0	0	0	0	0	0	0	0	GCCGACGCGGTAATACGGAGGGTGCGAGCGTTGTCCGGATTTATTGGGTTTAAAGGGTGCGTAGGCGGACCTGTAAGTCAGTGGTGAAATCTCTCAGCTTAACTGAGAAACTGCCATTGATACTGCAGGTCTAGAGTATAGATGACG
g__Zoogloea, FS10000387:4:BNT40308-1625:1:1106:12210:3780 1:N:0:6	k__Bacteria, p__Proteobacteria, c__Betaproteobacteria, o__Rhodocyclales, f__Rhodocyclaceae, g__Zoogloea, s__	9	0	0	0	0	0	7	0	0	0	0	0	0	0	0	0	0	2	0	0	0	0	0	0	0	0	0	0	0	0	0	0	0	0	0	0	0	0	0	0	0	0	0	0	0	GCCGCTGCGGTAATACGTAGGGTGCGAGCGTTAATCGGAATTACTGGGCGTAAAGCGTGCGCAGGCGGTTATGTAAGACAGATGTGAAATCCCCGGGCTCAACCTGGGAACTGCCATTGTGACTGCAAGGCTAGAGTGCGGCAGAGG
f__Oxalobacteraceae, FS10000387:4:BNT40308-1625:1:1106:6920:3690 1:N:0:18	k__Bacteria, p__Proteobacteria, c__Betaproteobacteria, o__Burkholderiales, f__Oxalobacteraceae, g__, s__	11	0	0	0	0	0	1	0	0	0	0	0	0	0	0	0	0	10	0	0	0	0	0	0	0	0	0	0	0	0	0	0	0	0	0	0	0	0	0	0	0	0	0	0	0	GCAGCGGTAATACGTAGGGTGCGAGCGTTAATCGGAATTACTGGGCGTAAAGCGTGCGCAGGCGGTTATGTAAGACAGATGTGAAATCCCCGGGCTTAACCTGGGAACTGCATTCGTGACTGCAAGGCTAGAGTATGGCAGAGGGGG
f__Nocardioidaceae, FS10000387:4:BNT40308-1625:1:1108:3450:2040 1:N:0:6	k__Bacteria, p__Actinobacteria, c__Actinobacteria, o__Actinomycetales, f__Nocardioidaceae, g__, s__	3	0	0	0	0	0	3	0	0	0	0	0	0	0	0	0	0	0	0	0	0	0	0	0	0	0	0	0	0	0	0	0	0	0	0	0	0	0	0	0	0	0	0	0	0	GCAGCCGCGGTAATACGTAGGGTCCGAGCGTTGTCCGGAATTACTGGGCGTAAAGGGCTCGTAGGCGGTCTGTCGCGTCGGTCGTGAAAACTCAGGGCTTAACCCTGAGCGCGCTTCCGATACGGGCAGACTAGAGGTATGCAGGGG
f__Comamonadaceae, FS10000387:4:BNT40308-1625:1:1112:1270:2250 1:N:0:6	k__Bacteria, p__Proteobacteria, c__Betaproteobacteria, o__Burkholderiales, f__Comamonadaceae, g__, s__	8	0	0	0	0	0	8	0	0	0	0	0	0	0	0	0	0	0	0	0	0	0	0	0	0	0	0	0	0	0	0	0	0	0	0	0	0	0	0	0	0	0	0	0	0	GCCGCGGTAATACGTAGGGTGCGAGCGTTAATCGGAATTACTGGGCGTAAAGCGTGCGCAGGCGGTGATGTAAGACAGATGTGAAATCCCCGGGCTCAACCTGGGAACTGCCATTGTGACTGCAAGGCTAGAGTGCGGCAGAGGGGG
g__Leucobacter, FS10000387:4:BNT40308-1625:1:1113:13420:2480 1:N:0:6	k__Bacteria, p__Actinobacteria, c__Actinobacteria, o__Actinomycetales, f__Microbacteriaceae, g__Leucobacter, s__	3	0	0	0	0	0	3	0	0	0	0	0	0	0	0	0	0	0	0	0	0	0	0	0	0	0	0	0	0	0	0	0	0	0	0	0	0	0	0	0	0	0	0	0	0	GCAGCCGCGGTAATACGTAGGGTGCAAGCGTTATCCGGAATTATTGGGCGTAAAGAGCTCGTAGGCGGTTTGTCGCGTCTGCTGTGAAAACCCGGAGCTCAACTCCGGGCCTGCAGTGGGTACGGGCAGGCTAGAGTGCGGCAGAGG
f__Sphingomonadaceae, FS10000387:3:BNT40308-2320:1:1101:10330:1780 1:N:0:5	k__Bacteria, p__Proteobacteria, c__Alphaproteobacteria, o__Sphingomonadales, f__Sphingomonadaceae, g__, s__	4	0	0	0	0	0	0	0	0	0	0	0	0	0	0	0	0	0	0	0	0	0	0	3	0	0	0	0	0	0	0	0	0	0	1	0	0	0	0	0	0	0	0	0	0	GGGACAGCCGCCGCGGTAATACGGAGGGAGCTAGCGTTGTTCGGAATTACTGGGCGTAAAGCGCACGAAGGCGGCTATTCAAGTCAGAGGTGAAAGCCCGGGGCTCAACCCCGGAACTGCCTTTGAAACTAGATGGCTAGAATCTTGGAGA
s__shigelloides, FS10000387:3:BNT40308-2320:1:1101:11460:1810 1:N:0:16	k__Bacteria, p__Proteobacteria, c__Gammaproteobacteria, o__Enterobacteriales, f__Enterobacteriaceae, g__Plesiomonas, s__shigelloides	2	0	0	0	0	0	0	0	0	0	0	0	0	0	0	0	0	0	0	0	0	0	0	0	0	0	0	0	2	0	0	0	0	0	0	0	0	0	0	0	0	0	0	0	0	GTGCCAGCAGCCGCGGTAATACGGAGGGTGCAAGCGTTAATCGGAATTACTGGGCGTAAAGCGCACGCAGGCGGTTTGTTAAGTCAGATGTGAAATCCCCGAGCTCAACTTGGGAACTGCATTTGAAACTGCCAGACTTGAATAATTAGGA
o__EW055, FS10000387:3:BNT40308-2320:1:1101:12880:1460 1:N:0:31	k__Bacteria, p__TM7, c__TM7-3, o__EW055, f__, g__, s__	2	0	0	0	0	0	0	0	0	0	0	0	0	0	0	0	0	0	0	0	0	0	0	0	0	0	0	0	0	0	0	0	0	0	0	0	0	0	0	0	2	0	0	0	0	GTGTCAGCCGCCGCGGTCATACGTAGGGTGCAAGCATTATCCGGAGTGACTGGGCGTAAAGAGTTGCGTAGGCGGTTAGTAAAGCGAATAGTGAAACCTGGTGGCTCAACCATCAGACTATTATTCGAACTCACTAACTCGAGAATAGTA
f__Legionellaceae, FS10000387:3:BNT40308-2320:1:1101:14030:3920 1:N:0:16	k__Bacteria, p__Proteobacteria, c__Gammaproteobacteria, o__Legionellales, f__Legionellaceae, g__, s__	2	0	0	0	0	0	0	0	0	0	0	0	0	0	0	0	0	0	0	0	0	0	0	0	0	0	0	0	2	0	0	0	0	0	0	0	0	0	0	0	0	0	0	0	0	GTGTCAGCAGCCGCGGTAATACGGAGGGTGCAAGCGTTAATCGGAATTACTGGGCGTAAAGGGTGCGTAGGTGGTTTGATAAGTCATATGTAGAATCCCTGGGCTCAACCTGGGAATGTCGTGTGATACTGTTGGACTAGAGTATGGGAGA
f__Comamonadaceae, FS10000387:3:BNT40308-2320:1:1101:16120:2760 1:N:0:21	k__Bacteria, p__Proteobacteria, c__Betaproteobacteria, o__Burkholderiales, f__Comamonadaceae, g__, s__	2	0	0	0	0	0	0	0	0	0	0	0	0	0	0	0	0	0	0	0	0	0	0	0	0	0	0	0	0	0	0	0	0	0	2	0	0	0	0	0	0	0	0	0	0	GTGTCAGCAGCGGTAATACGTAGGGTGCAAGCGTTAATCGGAATTACTGGGCGTAAAGCGTGCGCAGGCGGCTATGTAAGACAGGTGTGAAATCCCCGAGCTTAACTTGGGAATTGCATTTGTGACTGCATGGCTAGAGTGTGTCAGAGGA
f__Moraxellaceae, FS10000387:3:BNT40308-2320:1:1101:3960:3590 1:N:0:15	k__Bacteria, p__Proteobacteria, c__Gammaproteobacteria, o__Pseudomonadales, f__Moraxellaceae, ,	2	0	0	0	0	0	0	0	0	0	0	0	0	0	0	0	0	0	0	0	0	0	0	0	0	0	0	0	0	1	0	1	0	0	0	0	0	0	0	0	0	0	0	0	0	GTGTCAGCCGCCGCGGTAATACAGAGGGTGCGAGCGTTAATCGGATTTACTGGGCGTAAAGCGTGCGTAGGCGGCTTTTTAAGTCGGATGTGAAATCCCCGAGCTTAACTTGGGAATTGCATTCGATACTGGGAAGCTAGAGTATAGATG
g__Acinetobacter, FS10000387:3:BNT40308-2320:1:1101:6620:2880 1:N:0:3	k__Bacteria, p__Proteobacteria, c__Gammaproteobacteria, o__Pseudomonadales, f__Moraxellaceae, g__Acinetobacter, s__	2	0	0	0	0	0	0	0	0	0	0	0	0	0	0	0	0	0	0	0	0	0	0	0	0	1	0	0	0	0	0	0	1	0	0	0	0	0	0	0	0	0	0	0	0	GTGTCAGCCGCCGCGGTAATACAGAGGGTGCGAGCGTTAATCGGATTTACTGGGCGTAAAGCGTGCGTAGGCGGCTGATTAAGTCGGATGTGAAATCCCTGAGCTTAACTTAGGAACTGCATTCGATACTGGCTAGCTAGAGTGTGGGAGA
f__Oxalobacteraceae, FS10000387:3:BNT40308-2320:1:1101:6730:3700 1:N:0:32	k__Bacteria, p__Proteobacteria, c__Betaproteobacteria, o__Burkholderiales, f__Oxalobacteraceae, ,	2	0	0	0	0	0	0	0	0	0	0	0	0	0	0	0	0	0	0	0	0	0	0	0	0	0	0	0	0	0	0	0	0	0	0	0	0	0	0	2	0	0	0	0	0	GTGTCAGCAGCCGCGGTAATACGTAGGGTGCAAGCGTTAATCGGAATTACTGGGCGTAAAGCGTGCGCAGGCGGTTTTGTAAGACTGTCGTGAAATTCCCGGGCTCAACCTGTGTATGGCGATGGTGACTGCAAGACTAGAGTTTGGCAGA
o__Vibrionales, FS10000387:3:BNT40308-2320:1:1101:7890:1500 1:N:0:27	k__Bacteria, p__Proteobacteria, c__Gammaproteobacteria, o__Vibrionales, , ,	2	0	0	0	0	0	0	0	0	0	0	0	0	0	0	0	0	0	0	0	0	0	0	0	0	0	0	0	0	0	0	0	0	0	0	0	0	0	0	0	0	0	0	0	2	GTGTCAGCCGCCGCGATAATACGGAGGGTGCAAGCGTTAATCGGAATTACTGGGCGTAAAGCGCATGTAGGTGGTTTATTAAGTCAGATGTGAAAGCCCTGGGCTCAACCTAGGAATCGCATTTGAAACTGACAAGCTAGAGTACTGTAGA
f__Oxalobacteraceae, FS10000387:3:BNT40308-2320:1:1102:15880:2620 1:N:0:21	k__Bacteria, p__Proteobacteria, c__Betaproteobacteria, o__Burkholderiales, f__Oxalobacteraceae, g__, s__	2	0	0	0	0	0	0	0	0	0	0	0	0	0	0	0	0	0	0	0	0	0	0	0	0	0	0	0	0	0	0	0	0	0	2	0	0	0	0	0	0	0	0	0	0	GTGTCAGCAGCCGCGGTAATACGTAGGGTGCAAGCGTTAATCGGAATTACTGGGCGTAAAGCGTACGCAGGCGGTTTTGTAAGTCTGTCGTGAAATCCCCGAGCTCAACCTGGGAATTGCGATGGAAACTGCTAAGCTAGAATCTGGCAGA
f__Oxalobacteraceae, FS10000387:3:BNT40308-2320:1:1102:4520:1940 1:N:0:16	k__Bacteria, p__Proteobacteria, c__Betaproteobacteria, o__Burkholderiales, f__Oxalobacteraceae, ,	2	0	0	0	0	0	0	0	0	0	0	0	0	0	0	0	0	0	0	0	0	0	0	0	0	0	0	0	1	0	0	0	0	0	0	0	0	0	0	1	0	0	0	0	0	GTGTCAGCTGCCGCGGTAATACGTAGGGTGCAAGCGTTAATCGGAATTACTGGGCGTAAAGCGTGCGCAGGCGGTTTTGTAAGACTGTCGTGAAATCCCCGGGCTCAACCTGGGAATGGCAATGGTAACTGCTAGGCTAGAGTTTGGCAGA
f__Comamonadaceae, FS10000387:3:BNT40308-2320:1:1102:4610:2660 1:N:0:32	k__Bacteria, p__Proteobacteria, c__Betaproteobacteria, o__Burkholderiales, f__Comamonadaceae, g__, s__	6	0	0	0	0	0	4	0	0	0	0	0	0	0	0	0	0	0	0	0	0	0	0	0	0	0	0	0	0	0	0	0	0	0	0	0	0	0	0	2	0	0	0	0	0	GTGTCAGCCGCCGCGGTAATACGTAGGGTGCAAGCGTTAATCGGAATTACTGGGCGTAAAGCGTGCGCAGGCGGTTATGTAAGACAGATGTGAAATCCCCGGGCTCAACCTGGGAACTGCCATTGTGACTGCAAGGCTAGAGTGCGGCAGA
g__Cytophaga, FS10000387:3:BNT40308-2320:1:1102:6690:2230 1:N:0:5	k__Bacteria, p__Bacteroidetes, c__Cytophagia, o__Cytophagales, f__Cytophagaceae, g__Cytophaga, s__	4	0	0	0	0	0	0	0	0	0	0	0	0	0	0	0	0	0	0	0	0	0	0	1	0	0	0	0	0	0	0	0	0	0	3	0	0	0	0	0	0	0	0	0	0	GTGTCAGCCGCCGCGGTAATACGTAGGTGGCAAGCGTTGTCCGGATTTATTGGGTTTAAAGGGTGCGTAGGCGGCTTGATAAGTCAGTGGTGAAAGCCGATCGCTTAACGATCGAACTGCCATTGATACTGTCGGGCTTGAGTATAGATGA
g__Fluviicola, FS10000387:3:BNT40308-2320:1:1103:1110:1940 1:N:0:16	k__Bacteria, p__Bacteroidetes, c__Flavobacteriia, o__Flavobacteriales, f__Cryomorphaceae, g__Fluviicola, s__	2	0	0	0	0	0	0	0	0	0	0	0	0	0	0	0	0	0	0	0	0	0	0	0	0	0	0	0	2	0	0	0	0	0	0	0	0	0	0	0	0	0	0	0	0	GTGTCAGCAGCCGCGGTAATACGGAGGGTGCAAGCGTTATCCGGAATCATTGGGTTTAAAGGGTCCGCAGGCGGTCTTATAAGTCAGTGGTGAAAGCCTACAGCTCAACTGTAGAACTGCCATTGATACTGTAGGACTTGAATAGACTAGA
f__Enterobacteriaceae, FS10000387:3:BNT40308-2320:1:1103:15760:2900 1:N:0:28	k__Bacteria, p__Proteobacteria, c__Gammaproteobacteria, o__Enterobacteriales, f__Enterobacteriaceae, ,	2	0	0	0	0	0	0	0	0	0	0	0	0	0	0	0	0	0	0	0	0	0	0	0	0	0	0	0	0	0	0	0	0	0	0	0	0	0	0	0	0	0	0	2	0	GTGCCAGCAGCCGCGGTAATACGGAGGGTGCAAGCGTTAATCGGAATTACTGGGCGTAAAGCGCACGCAGGCGGTTTGTTAAGTCAGATGTGAAATCCCCGAGCTTAACTTCGGAACTCCATTTAAATCTGGCAACCTAGAGTCTTGTAAA
f__Enterobacteriaceae, FS10000387:3:BNT40308-2320:1:1103:5820:3590 1:N:0:3	k__Bacteria, p__Proteobacteria, c__Gammaproteobacteria, o__Enterobacteriales, f__Enterobacteriaceae, ,	8	0	0	0	0	0	0	0	0	0	0	0	0	0	0	0	0	0	0	0	0	0	0	0	0	1	0	0	0	0	0	2	1	0	0	0	1	0	0	1	2	0	0	0	0	GTGTCAGCCGCCGCGGTAATACGGAGGGTGCAAGCGTTAATCGGAATTACTGGGCGTAAAGCGCACGCAGGCGGTTTGTTAAGTCAGATGTGAAATCCCCGAGCTTAACTTGGGAACTGCATTTGAAACTGGCGAGCTAGAGTATGGTAGA
f__Isosphaeraceae, FS10000387:3:BNT40308-2320:1:1103:7070:2360 1:N:0:16	k__Bacteria, p__Planctomycetes, c__Planctomycetia, o__Gemmatales, f__Isosphaeraceae, g__, s__	2	0	0	0	0	0	0	0	0	0	0	0	0	0	0	0	0	0	0	0	0	0	0	0	0	0	0	0	2	0	0	0	0	0	0	0	0	0	0	0	0	0	0	0	0	GTGTCAGCAGCCGCGGTAAGACGAACCGTCCTAACGTTATTCGGAATTACTGGGCTTAAAGCGCGTGTAGGCGGGAAGGCACGTCCGTCGCTGAAATCCCCCGGCTCAACCGGGGAACGGGCGGGGATACGACCATCCTGGAGGGGTGTAG
g__Flavobacterium, FS10000387:3:BNT40308-2320:1:1103:7950:2440 1:N:0:32	k__Bacteria, p__Bacteroidetes, c__Flavobacteriia, o__Flavobacteriales, f__Flavobacteriaceae, g__Flavobacterium, s__	2	0	0	0	0	0	0	0	0	0	0	0	0	0	0	0	0	0	0	0	0	0	0	0	0	0	0	0	0	0	0	0	0	0	0	0	0	0	0	2	0	0	0	0	0	GTGTCAGCAGCCGCGGTAATACGGAGGATGCGAGCGTTATCCGGAATCATTGGGTTTAAAGGGTTCGTAGGCGGTTTAATAAGTCAGTGGTGAAATCTGGTTGCTCAACGATCAAACTGCTATTGATACTGTTAGACTTGAATTATTGAGA
f__[Chromatiaceae], FS10000387:3:BNT40308-2320:1:1103:9730:1480 1:N:0:17	k__Bacteria, p__Proteobacteria, c__Gammaproteobacteria, o__Alteromonadales, f__[Chromatiaceae], g__, s__	2	0	0	0	0	0	0	0	0	0	0	0	0	0	0	0	0	0	0	0	0	0	0	0	0	0	0	0	0	0	0	0	0	0	0	0	0	0	1	0	0	0	1	0	0	GTGTCAGCTGCCGCGGTAATACAGAGGGTGCAAGCGTTAATCGGAATTACTGGGCGTAAAGCGCACGCAGGCGGTTTATTAAGTCAGATGTGAAATCCCCGAGCTTAACTTAGGAACTGCATTTGAAACTGGCTAGCTAGAGTTTTGTAGA
f__Acetobacteraceae, FS10000387:3:BNT40308-2320:1:1104:10630:2960 1:N:0:17	k__Bacteria, p__Proteobacteria, c__Alphaproteobacteria, o__Rhodospirillales, f__Acetobacteraceae, g__, s__	2	0	0	0	0	0	0	0	0	0	0	0	0	0	0	0	0	0	0	0	0	0	0	0	0	0	0	0	0	0	0	0	0	0	0	0	0	0	2	0	0	0	0	0	0	GTGTCAGCAGCCGCGGTAATACGAAGGGGGCTAGCGTTGCTCGGAATTACTGGGCGTAAAGGGCGCGTAGGCGGCGCTTCTAGTCGGGCGTGAAATCCCCGGGCTCAACCCGGGGGCTGCGTTCGATACGGTGGCGCTGGAGGGCGGGAGA
f__Aeromonadaceae, FS10000387:3:BNT40308-2320:1:1104:16000:3310 1:N:0:2	k__Bacteria, p__Proteobacteria, c__Gammaproteobacteria, o__Aeromonadales, f__Aeromonadaceae, g__, s__	2	0	0	0	0	0	0	0	0	0	0	0	0	0	0	0	0	0	0	0	0	0	0	0	0	0	1	1	0	0	0	0	0	0	0	0	0	0	0	0	0	0	0	0	0	GTGTCAGCCGCCGCGGTAATACAGAGGGTGCAAGCGTTAATCGGAATTACTGGGCGTAAAGCGCACGCAGGCGGTTCGATAAGTTGGATGTGAAAGCCCCGGGCTCAACCTGGGAACTGCATCCAAAACTGGCCAGCTAGAGTTTGGTAGA
f__Enterobacteriaceae, FS10000387:3:BNT40308-2320:1:1105:14120:3300 1:N:0:29	k__Bacteria, p__Proteobacteria, c__Gammaproteobacteria, o__Enterobacteriales, f__Enterobacteriaceae, ,	2	0	0	0	0	0	0	0	0	0	0	0	0	0	0	0	0	0	0	0	0	0	0	0	0	0	0	0	0	0	0	0	0	0	0	0	0	0	0	0	0	0	1	1	0	GTGTCAGCAGCCGCGGTAATACGGAGGGTGCAAGCGTTAATCGGAATTACTGGGCGTAAAGCGCACGCAGGCGGTTTGTTAAGTCAGATGTGAAATCCCCAAGCTTAACTTGGGAACTACATTTGAAACTAACAAGCTAGAGTCTTGTA
o__Sphingobacteriales, FS10000387:3:BNT40308-2320:1:1105:6810:3690 1:N:0:27	k__Bacteria, p__Bacteroidetes, c__Sphingobacteriia, o__Sphingobacteriales, f__, g__, s__	2	0	0	0	0	0	0	0	0	0	0	0	0	0	0	0	0	0	0	0	0	0	0	0	0	0	0	0	0	0	0	0	0	0	0	0	0	0	0	0	0	0	0	0	2	GTGTCAGCAGCCGCGGTAATACAGAGGGTGCGTAGGCGGACCTGTAAGTCAGTGGTGAAATCTCTCAGCTTAACTGAGAAACTGCCATTGATACTGCAGGTCTAGAGTATAGATGACGTTGGCGGAATATGACATGTAGTGGTGAAATA
f__Sphingomonadaceae, FS10000387:3:BNT40308-2320:1:1105:6940:1910 1:N:0:5	k__Bacteria, p__Proteobacteria, c__Alphaproteobacteria, o__Sphingomonadales, f__Sphingomonadaceae, g__, s__	4	0	0	0	0	0	0	0	0	0	0	0	0	0	0	0	0	0	0	0	0	0	0	3	0	0	0	0	0	0	0	0	0	0	0	0	0	0	0	1	0	0	0	0	0	GTGTCAGCAGCCGCGGTAATACGGAGGGAGCTAGCGTTGTTCGGAATTACTGGGCGTAAAGCGCACGTAGGCGGCTATTCAAGTCAGAGGTGAAAGTCCGGGGCTCAACCTCTGTACTGCCTTTGAAACTAGATGACTAGAATCTTGGAGA
f__Oxalobacteraceae, FS10000387:3:BNT40308-2320:1:1105:7560:2530 1:N:0:16	k__Bacteria, p__Proteobacteria, c__Betaproteobacteria, o__Burkholderiales, f__Oxalobacteraceae, g__, s__	2	0	0	0	0	0	0	0	0	0	0	0	0	0	0	0	0	0	0	0	0	0	0	0	0	0	0	0	1	0	0	0	0	0	0	0	0	1	0	0	0	0	0	0	0	GTGTCAGCAGCCGCGGTAATACGTAGGGTGCAAGCGTTAATCGGAATTACTGGGCGTAAAGCGTACGCAGGCGGTTTTGTAAGACAGTGGTGAAATCCCCGAGCTCAACCTGGGAACTGCTATTGTGACTGCTAGGCTAGAGTGCGGCAGA
f__Parachlamydiaceae, FS10000387:3:BNT40308-2320:1:1105:9940:3970 1:N:0:32	k__Bacteria, p__Chlamydiae, c__Chlamydiia, o__Chlamydiales, f__Parachlamydiaceae, ,	2	0	0	0	0	0	0	0	0	0	0	0	0	0	0	0	0	0	0	0	0	0	0	1	0	0	0	0	0	0	0	0	0	0	0	0	0	0	0	1	0	0	0	0	0	GTGTCAGCAGCTGCGGTAATACGGAGGGTGCAAGCATTAATCGGATTTATTGGGCGTAAAGGGCGCGTAGGCGGAAATGCAAGTCAGATGTGAAATCCCGGGGCTCACCCCCGGAACAGCATTTGAAACTGCATTCCTTGAGGGTAGGCGG
f__Pseudoalteromonadaceae, FS10000387:3:BNT40308-2320:1:1106:9000:1900 1:N:0:5	k__Bacteria, p__Proteobacteria, c__Gammaproteobacteria, o__Vibrionales, f__Pseudoalteromonadaceae, g__, s__	2	0	0	0	0	0	0	0	0	0	0	0	0	0	0	0	0	0	0	0	0	0	0	2	0	0	0	0	0	0	0	0	0	0	0	0	0	0	0	0	0	0	0	0	0	GTGTCAGCCGCTGCTGTAATACGGAGGGTGCGAGCGTTAATCGGAATTACTGGGCGTAAAGCGCATGCAGGTGGTTTGTTAAGTCAGATGTGAAAGCCCTGGGCTCAACCTAGGAGTTGCATTTGAAACTGACAAGCTAGAGTACTGTAGA
f__Sphingomonadaceae, FS10000387:3:BNT40308-2320:1:1107:10240:1470 1:N:0:5	k__Bacteria, p__Proteobacteria, c__Alphaproteobacteria, o__Sphingomonadales, f__Sphingomonadaceae, g__, s__	2	0	0	0	0	0	0	0	0	0	0	0	0	0	0	0	0	0	0	0	0	0	0	2	0	0	0	0	0	0	0	0	0	0	0	0	0	0	0	0	0	0	0	0	0	GTGTCAGCAGCCGCGGTAATACGGAGGGAGCTAGCGTTGTTCGGAATTACTGGGCGTAAAGCGCACGTAGGCGGCTATTCAAGTCAGAGGTGAAATCCCGGGGCTCAACCCCGGAACTGCCTTTGAAACTACATGGCTAGAATCTTGCAGA
p__Chlorobi, FS10000387:3:BNT40308-2320:1:1107:12500:2710 1:N:0:21	k__Bacteria, p__Chlorobi, c__, o__, f__, g__, s__	2	0	0	0	0	0	0	0	0	0	0	0	0	0	0	0	0	0	0	0	0	0	0	0	0	0	0	0	0	0	0	0	0	0	2	0	0	0	0	0	0	0	0	0	0	GTGTCAGCAGCCGCGGTAATACGTAGGATCCGAGCGTTGTCCGGATTTACTGGGTGTAAAGGGTGCGCAGGCGGAGTGGTAAGTCAGAGGTGAAATCTCGTCGCTTAACGACGAAACTGCCTTTGATACTATCATTCTTGAGTCCGGTAGA
f__Pseudoalteromonadaceae, FS10000387:3:BNT40308-2320:1:1107:13600:1960 1:N:0:16	k__Bacteria, p__Proteobacteria, c__Gammaproteobacteria, o__Vibrionales, f__Pseudoalteromonadaceae, g__, s__	2	0	0	0	0	0	0	0	0	0	0	0	0	0	0	0	0	0	0	0	0	0	0	0	0	0	0	0	2	0	0	0	0	0	0	0	0	0	0	0	0	0	0	0	0	GTGTCAGCAGCGGTAATACGGAGGGTGCGAGCGTTAATCGGAATTACTGGGCGTAAAGCGCATGCAGGTGGTTTGTTAAGTCAGATGTGAAAGCCCTGGGCTCAACCTAGGAGTTGCATTTGAAACTGACAAGCTAGAGTACTGTAGAGGG
f__Methylobacteriaceae, FS10000387:3:BNT40308-2320:1:1107:16090:1450 1:N:0:5	k__Bacteria, p__Proteobacteria, c__Alphaproteobacteria, o__Rhizobiales, f__Methylobacteriaceae, g__, s__	2	0	0	0	0	0	0	0	0	0	0	0	0	0	0	0	0	0	0	0	0	0	0	2	0	0	0	0	0	0	0	0	0	0	0	0	0	0	0	0	0	0	0	0	0	GTGTCAGCAGCCGCGGTAATACGAAGGGGGCTAGCGTTGCTCGGAATCACTGGGCGTAAAGGGCGCGTAGGCGGCTGATTTAGTCGAGGGTGAAAGTCCGTGGCTCAACCACTGTATGGCCTTCGATACTGATTGACTTGAGACCGGAAGA
[truncated: 56 more rows]

## Sheet: antibiotics treatment 20℃
Observed OTUs in the antibiotics-administration experiments and their read number in each samples
[truncated: 176 more rows]
