# Supplementary material for: Establishing a Percutaneous Infection Model Using Zebrafish and a Salmon Pathogen
Source: Biology (Basel). 2021 Feb 22;10(2):166. doi: 10.3390/biology10020166 (PMC7926712; doi:10.3390/biology10020166)
Supplement: Supplementary file 1 [file biology-10-00166-s001.zip › biology-1093227-suppl-final/biology-1093227-Data S2.xls]

## Sheet: shannon index rarefaction curve
Name/reads	1	32	62	93	123	154	185	215	246	276	307	338	368	399	429	460	490	521	552	582	613	643	674	705	735	766	796	827	858	888	919	949	980	1011	1041	1072	1102	1133	1163	1194	1225	1255	1286	1316	1347	1378	1408	1439	1469
20℃ normal 1	0	3.4156	3.82452	3.97754	4.04494	4.08529	4.14732	4.18541	4.20982	4.23962	4.25961	4.24494	4.28347	4.30227	4.32604	4.31657	4.32937	4.33988	4.32329	4.35295	4.33515	4.34285	4.36415	4.36683	4.33832	4.37199	4.36546	4.38015	4.36951	4.3784	4.38527	4.39461	4.37384	4.39016	4.38575	4.39952	4.40544	4.40503	4.39106	4.39164	4.40728	4.40284	4.40259	4.39369	4.40049	4.4034	4.41088	4.39866	4.41755
20℃ normal 2	0	3.06659	3.33366	3.45673	3.49856	3.57829	3.60071	3.67391	3.67804	3.68569	3.69977	3.73476	3.72188	3.74579	3.75194	3.76161	3.77604	3.78959	3.78226	3.78863	3.79002	3.78809	3.79748	3.80649	3.80284	3.82143	3.81192	3.80712	3.8269	3.83908	3.84649	3.83612	3.8311	3.84614	3.83326	3.83912	3.84837	3.83468	3.84494	3.84991	3.85368	3.85586	3.86382	3.8641	3.86159	3.84649	3.86188	3.86748	3.86632
20℃ normal 3	0	3.2338	3.55994	3.7809	3.78351	3.89438	3.93952	3.96299	3.97088	4.01387	4.02749	4.02716	4.04575	4.08074	4.07417	4.07021	4.08654	4.09611	4.10458	4.11171	4.13136	4.11899	4.12356	4.12884	4.13195	4.15749	4.13663	4.15273	4.16466	4.16442	4.16595	4.18148	4.16211	4.17526	4.17602	4.1886	4.17761	4.19893	4.19505	4.18556	4.18618	4.19355	4.19701	4.18838	4.19736	4.19362	4.20484	4.212	4.20554
20℃ normal 4	0	3.55103	3.87083	3.95544	4.12055	4.17689	4.20459	4.2529	4.29033	4.2974	4.32238	4.36001	4.36353	4.38896	4.42371	4.39582	4.43098	4.41774	4.41996	4.44037	4.43056	4.44657	4.45947	4.46752	4.46275	4.49042	4.48985	4.49341	4.48846	4.48903	4.49008	4.50258	4.49469	4.50236	4.51536	4.50889	4.50871	4.52138	4.52296	4.52347	4.52219	4.53351	4.51894	4.53599	4.55167	4.54222	4.53521	4.52239	4.54287
20℃ pathogen+ 1	0	2.8637	3.11328	3.29534	3.31281	3.41809	3.42395	3.43738	3.46045	3.48393	3.49885	3.50658	3.51153	3.50418	3.53537	3.53099	3.54771	3.5565	3.55915	3.56513	3.57637	3.57934	3.57736	3.57515	3.55595	3.57408	3.58952	3.59825	3.58574	3.60492	3.608	3.5968	3.59861	3.60057	3.60055	3.60777	3.60975	3.61363	3.61204	3.61076	3.61617	3.6211	3.62439	3.62238	3.62284	3.62233	3.63509	3.61973	3.62858
20℃ pathogen+ 2	0	3.28808	3.62494	3.84099	3.90528	3.98383	3.98727	4.05298	4.1187	4.09351	4.1387	4.13869	4.17961	4.17749	4.18512	4.19907	4.21137	4.20386	4.21316	4.25465	4.22879	4.24156	4.24067	4.23954	4.23999	4.26003	4.28207	4.27411	4.27743	4.26131	4.27838	4.27908	4.29776	4.28317	4.29086	4.28514	4.31185	4.30164	4.29938	4.30493	4.31511	4.29354	4.30388	4.32637	4.32632	4.32798	4.31572	4.31556	4.30426
20℃ pathogen+ 3	0	2.84426	3.16524	3.21087	3.32782	3.33385	3.3841	3.40346	3.42966	3.43458	3.43266	3.47415	3.4669	3.47461	3.48671	3.4846	3.49801	3.51987	3.52549	3.51171	3.51796	3.52564	3.51844	3.52167	3.54213	3.53586	3.54262	3.52314	3.54389	3.54457	3.5519	3.55891	3.54707	3.56255	3.5659	3.55869	3.56838	3.55414	3.56389	3.55284	3.56791	3.56329	3.56546	3.56037	3.57617	3.5685	3.57633	3.56571	3.58526
20℃ pathogen+ 4	0	2.85545	3.15694	3.24502	3.33594	3.34498	3.40434	3.41027	3.4598	3.45356	3.44747	3.47273	3.47917	3.48979	3.49106	3.51599	3.51484	3.5103	3.50863	3.50402	3.53106	3.53645	3.5327	3.54088	3.54305	3.53187	3.55499	3.53514	3.54281	3.54902	3.55879	3.55266	3.56552	3.55917	3.56772	3.55827	3.56488	3.56372	3.5538	3.56987	3.56372	3.57512	3.57976	3.57857	3.58014	3.58266	3.585	3.57634	3.57606
20℃ pathogen+ 5	0	3.02715	3.25601	3.39348	3.45349	3.50149	3.5814	3.59861	3.59666	3.62923	3.65389	3.68275	3.68294	3.67005	3.69492	3.69294	3.71884	3.72489	3.73177	3.74996	3.75146	3.74471	3.73753	3.74311	3.76136	3.76839	3.76984	3.77755	3.77099	3.77604	3.75901	3.77747	3.77535	3.77068	3.78838	3.78853	3.7842	3.80151	3.79761	3.793	3.79197	3.79231	3.79122	3.80584	3.80417	3.80525	3.81447	3.80513	3.80845
20℃ injured 1	0	3.55251	3.87802	4.02382	4.10141	4.17818	4.23127	4.28936	4.29081	4.33428	4.35569	4.34411	4.37603	4.39018	4.41455	4.40927	4.4301	4.42912	4.45245	4.44364	4.44532	4.45747	4.47757	4.46961	4.46335	4.47885	4.50976	4.47906	4.49067	4.49689	4.49736	4.51114	4.50207	4.51271	4.51291	4.51676	4.51453	4.51727	4.52258	4.52122	4.5185	4.53682	4.53924	4.53879	4.53564	4.53588	4.54596	4.53762	4.53872
20℃ injured 2	0	3.63492	3.97568	4.12424	4.28128	4.32171	4.38606	4.4044	4.47898	4.4903	4.53931	4.54521	4.54896	4.55857	4.57879	4.58577	4.60835	4.59198	4.61884	4.61857	4.62869	4.65402	4.64435	4.66093	4.66975	4.66271	4.6596	4.67422	4.67977	4.67233	4.67774	4.68308	4.69175	4.70002	4.69791	4.68927	4.69987	4.71528	4.71332	4.7092	4.71764	4.71085	4.71817	4.72142	4.71911	4.71865	4.71611	4.71771	4.72025
20℃ injured 3	0	3.32368	3.55207	3.78006	3.85867	3.94534	3.98663	4.00746	4.05164	4.07543	4.09005	4.13804	4.14872	4.16675	4.15747	4.16311	4.16656	4.19165	4.18074	4.1923	4.19186	4.19599	4.20167	4.21153	4.21274	4.22415	4.25093	4.24307	4.23777	4.24342	4.22984	4.24179	4.24281	4.24181	4.25426	4.25801	4.25895	4.27456	4.2681	4.25683	4.2769	4.27159	4.26558	4.26406	4.28238	4.27872	4.28278	4.277	4.28254
20℃ injured 4	0	3.15413	3.46963	3.60279	3.65801	3.71793	3.78253	3.79163	3.80702	3.83275	3.87453	3.87772	3.89024	3.9009	3.9079	3.92231	3.9327	3.92642	3.937	3.94723	3.94938	3.96498	3.97336	3.9569	3.96649	3.99172	3.98755	3.97293	3.98595	3.99174	3.98777	3.98943	3.99928	4.01319	3.99843	3.99537	4.00531	4.00158	4.01434	4.00983	4.02359	4.00724	4.01438	4.00248	4.01628	4.01393	4.02106	4.01988	4.03258
20℃ injured+pathogen 1	0	2.34669	2.60714	2.7711	2.81156	2.85299	2.88682	2.94338	3.00729	2.95315	3.02367	3.02763	3.03031	3.04274	3.06404	3.06559	3.06066	3.07917	3.06998	3.10366	3.11753	3.09334	3.09885	3.1102	3.1347	3.11367	3.13406	3.12841	3.12949	3.13941	3.12979	3.12354	3.14392	3.13824	3.1142	3.13808	3.15914	3.15486	3.15881	3.15582	3.15018	3.14915	3.15649	3.16934	3.1657	3.18094	3.18768	3.17659	3.18312
20℃ injured+pathogen 2	0	0.297453	0.331107	0.338442	0.358683	0.349967	0.373864	0.375764	0.402795	0.392928	0.387293	0.395149	0.415613	0.414175	0.40589	0.416302	0.419666	0.423158	0.444852	0.432395	0.429423	0.419896	0.429448	0.433114	0.428389	0.427183	0.436156	0.430689	0.446222	0.433654	0.438125	0.433289	0.430614	0.444591	0.447136	0.447848	0.445449	0.445144	0.44151	0.443853	0.45146	0.437845	0.436294	0.451641	0.444163	0.448104	0.452551	0.453965	0.45412
20℃ injured+pathogen 3	0	0.0942052	0.0853415	0.0751725	0.107843	0.0943608	0.103141	0.0955392	0.0902389	0.11219	0.112343	0.10984	0.118956	0.11447	0.11378	0.113817	0.113548	0.118678	0.116208	0.116303	0.124707	0.111878	0.121984	0.121063	0.121846	0.123523	0.124043	0.131075	0.127831	0.12274	0.128682	0.117468	0.120736	0.122876	0.12377	0.133435	0.13177	0.123188	0.131777	0.135445	0.125152	0.136615	0.132183	0.135425	0.123247	0.136462	0.132658	0.136039	0.127731
20℃ injured+pathogen 4	0	0.233927	0.241822	0.273083	0.284969	0.318934	0.288165	0.300668	0.305148	0.31275	0.298312	0.315901	0.298757	0.314952	0.307853	0.332478	0.336906	0.331534	0.321344	0.329341	0.329422	0.334115	0.324715	0.326289	0.330564	0.325974	0.339126	0.344675	0.337125	0.332988	0.333382	0.339512	0.340846	0.346756	0.3357	0.336072	0.342837	0.340078	0.332882	0.336927	0.346872	0.343717	0.337458	0.345925	0.350945	0.349885	0.347862	0.350511	0.347961
20℃ injured+pathogen 5	0	0.963732	0.99241	1.07195	1.11554	1.15156	1.1272	1.17669	1.17024	1.18823	1.18041	1.21478	1.22437	1.18778	1.2069	1.2083	1.22775	1.20363	1.22651	1.21232	1.22346	1.24059	1.23421	1.21078	1.23686	1.23539	1.23501	1.24138	1.23778	1.23173	1.2502	1.2384	1.24254	1.24568	1.24816	1.24864	1.27056	1.26339	1.24514	1.25151	1.24739	1.24927	1.24197	1.26372	1.24397	1.26405	1.25535	1.26085	1.25888
20℃ anti+pathogen 1	0	0.0541535	0.0959552	0.0708689	0.0985554	0.100376	0.0936358	0.100302	0.103772	0.105152	0.103053	0.0958407	0.110184	0.110738	0.11395	0.114905	0.109969	0.122072	0.113289	0.113442	0.112624	0.11219	0.111511	0.117097	0.11796	0.113462	0.121722	0.116807	0.118092	0.119253	0.115978	0.112102	0.12156	0.116977	0.116393	0.121873	0.116461	0.125017	0.116506	0.116094	0.121655	0.120195	0.120548	0.124509	0.123692	0.130168	0.125114	0.122669	0.123297
20℃ anti+pathogen 2	0	0.0421016	0.0575464	0.0505595	0.0611129	0.056536	0.0593906	0.060374	0.0584664	0.0705252	0.0681172	0.0718171	0.0734023	0.0684923	0.0639004	0.0675239	0.072046	0.076291	0.0715644	0.0712384	0.081804	0.0722505	0.0767182	0.0785094	0.0756118	0.0771431	0.0747074	0.0807777	0.0786146	0.0861985	0.0785885	0.0787825	0.0798692	0.0778158	0.0731851	0.0817093	0.0783321	0.0807779	0.0773673	0.0814552	0.0784248	0.0791947	0.0776885	0.0805327	0.081966	0.0771219	0.0849356	0.0859061	0.0802212
20℃ anti+pathogen 3	0	0.0300788	0.0369107	0.02829	0.0338872	0.0422519	0.0458256	0.0358857	0.0421572	0.0386888	0.0382846	0.0489843	0.0399526	0.0466793	0.0412122	0.0431579	0.0417122	0.0427119	0.0480911	0.0491654	0.0430875	0.0467865	0.0472814	0.0458046	0.0433847	0.0442426	0.046764	0.0519454	0.0465696	0.0454725	0.0527001	0.0490602	0.0483223	0.0493772	0.04735	0.047668	0.0475014	0.0517652	0.0532413	0.0481982	0.0506448	0.0509735	0.0453428	0.0492802	0.0519979	0.0485423	0.0492501	0.0541083	0.0543305
20℃ anti+pathogen 4	0	2.03491	2.27137	2.34456	2.42453	2.45579	2.49506	2.53153	2.5336	2.58732	2.57802	2.59601	2.59072	2.63754	2.59369	2.62627	2.64134	2.62556	2.65468	2.65548	2.65068	2.67575	2.65777	2.67164	2.67757	2.66927	2.66019	2.66732	2.67051	2.68701	2.66969	2.68678	2.68842	2.67874	2.69961	2.69716	2.68854	2.71081	2.70866	2.6834	2.69088	2.6974	2.70418	2.69619	2.69387	2.713	2.69481	2.70618	2.70814
20℃ anti+ 1	0	3.82003	4.19369	4.36397	4.46042	4.52114	4.5645	4.6083	4.61376	4.64762	4.64306	4.66049	4.68376	4.69647	4.70351	4.72674	4.72382	4.71953	4.72605	4.75329	4.76072	4.75728	4.75719	4.76712	4.77312	4.7819	4.78416	4.78835	4.77596	4.78001	4.7868	4.77892	4.79505	4.78186	4.78907	4.79345	4.79613	4.80458	4.80095	4.79773	4.79725	4.79932	4.80488	4.79978	4.80305	4.81321	4.80644	4.80416	4.80631
20℃ anti+ 2	0	3.55797	3.90271	4.05778	4.13418	4.21356	4.23363	4.29006	4.29444	4.3018	4.30662	4.3278	4.35957	4.36798	4.38331	4.37139	4.39237	4.39213	4.40648	4.40026	4.43018	4.42362	4.42051	4.43684	4.42924	4.42237	4.41453	4.42699	4.42819	4.43474	4.4394	4.44293	4.42862	4.44536	4.45037	4.45016	4.45027	4.44935	4.4485	4.45047	4.45683	4.45486	4.46664	4.44957	4.46198	4.45746	4.46181	4.46692	4.45646
20℃ anti+ 3	0	3.71709	4.0812	4.25108	4.35555	4.41353	4.45055	4.49774	4.52593	4.54309	4.57419	4.56652	4.58405	4.59456	4.5982	4.59532	4.63263	4.62862	4.62807	4.63345	4.62266	4.63256	4.65559	4.65153	4.658	4.66095	4.65815	4.6589	4.67443	4.67245	4.66767	4.67962	4.6781	4.67715	4.67144	4.67601	4.69287	4.68156	4.68233	4.68467	4.68971	4.69448	4.69684	4.69535	4.69922	4.70318	4.7064	4.7	4.7037
20℃ anti+ 4	0	3.05567	3.27137	3.43555	3.52558	3.59043	3.58024	3.62887	3.67624	3.68105	3.69907	3.71922	3.75598	3.75552	3.74363	3.76892	3.81137	3.78443	3.78589	3.81419	3.82062	3.82852	3.82589	3.83254	3.82942	3.82224	3.82772	3.84944	3.84809	3.84829	3.83533	3.84806	3.8672	3.85968	3.8581	3.86201	3.8753	3.85444	3.86994	3.87701	3.87678	3.88343	3.87477	3.87483	3.86171	3.87615	3.86965	3.88477	3.89337
Name/reads	1	32	62	93	123	154	185	215	246	276	307	338	368	399	429	460	490	521	552	582	613	643	674	705	735	766	796	827	858	888	919	949	980	1011	1041	1072	1102	1133	1163	1194	1225	1255	1286	1316	1347	1378	1408	1439	1469
28℃ normal 1	0	2.50587	2.6456	2.78	2.75494	2.82725	2.85691	2.87279	2.88996	2.94537	2.94632	2.93093	2.94523	2.96983	2.96511	2.967	2.97307	2.94751	2.97787	2.97098	2.98062	2.98317	2.97855	2.9956	3.01288	2.99618	2.99157	2.99437	3.01354	2.98331	2.99396	2.99949	2.99514	3.00883	3.00984	2.9964	3.01502	3.02016	3.00858	2.99674	3.01135	3.01158	3.01519	3.01839	3.02724	3.0258	3.01611	3.02216	3.0259
28℃ normal 2	0	3.36619	3.58981	3.77007	3.81952	3.87235	3.94859	3.95917	3.95564	3.99481	3.98964	4.01786	4.02025	4.02659	4.02246	4.03615	4.03109	4.04655	4.04534	4.05647	4.05236	4.05574	4.06726	4.05127	4.06662	4.07139	4.06021	4.0705	4.06517	4.06632	4.07186	4.08069	4.0716	4.07908	4.07632	4.08501	4.07937	4.09038	4.08475	4.08951	4.07968	4.08889	4.09382	4.08601	4.09448	4.08781	4.09037	4.0857	4.09675
28℃ normal 3	0	3.22925	3.47102	3.63085	3.73449	3.74959	3.77822	3.82313	3.82108	3.84988	3.83911	3.85144	3.88303	3.87032	3.89322	3.89562	3.8976	3.89092	3.89865	3.90872	3.9091	3.92001	3.92253	3.92109	3.91361	3.92516	3.91803	3.93277	3.92731	3.92636	3.93971	3.92003	3.93097	3.92412	3.92389	3.93169	3.93762	3.93556	3.94561	3.94301	3.93826	3.95021	3.93756	3.94133	3.94656	3.94369	3.94154	3.94139	3.94231
28℃ normal 4	0	3.20406	3.44549	3.57232	3.6662	3.70362	3.7229	3.75615	3.74858	3.78017	3.76378	3.80123	3.79285	3.80403	3.80993	3.80847	3.8	3.81974	3.8285	3.83508	3.84114	3.84797	3.83523	3.84091	3.85016	3.85355	3.85162	3.85087	3.85647	3.85676	3.85763	3.87322	3.85162	3.86487	3.85443	3.86832	3.86286	3.86269	3.86373	3.87273	3.86549	3.87686	3.86715	3.86673	3.87745	3.87555	3.88314	3.88815	3.87391
28℃ normal 5	0	3.11294	3.40974	3.49383	3.53571	3.58973	3.64889	3.65406	3.68218	3.66892	3.70098	3.70425	3.70689	3.7111	3.72867	3.72331	3.73448	3.74535	3.73888	3.75778	3.75592	3.74802	3.75962	3.76068	3.75101	3.76537	3.76793	3.75942	3.76967	3.77536	3.77564	3.76774	3.77065	3.77202	3.77448	3.76932	3.77479	3.77966	3.78662	3.791	3.77956	3.79212	3.78329	3.7873	3.7885	3.78706	3.79095	3.79515	3.78682
28℃ pathogen+ 1	0	3.3714	3.64399	3.75451	3.87344	3.92178	3.94072	3.9665	3.96861	4.00067	4.01418	4.00606	4.01697	4.0307	4.04584	4.05331	4.04353	4.05325	4.06375	4.07664	4.07477	4.07067	4.09026	4.08756	4.0896	4.09713	4.09198	4.09187	4.09641	4.09945	4.10339	4.10623	4.09868	4.10896	4.10499	4.09114	4.10636	4.11319	4.11199	4.11542	4.1092	4.10886	4.116	4.11599	4.11908	4.1201	4.11254	4.11372	4.12592
28℃ pathogen+ 2	0	3.42453	3.7675	3.89542	3.96837	4.05194	4.0318	4.09061	4.08996	4.13515	4.11151	4.1446	4.15251	4.12819	4.17738	4.16099	4.16497	4.17904	4.17938	4.19294	4.18578	4.20119	4.19601	4.19596	4.20034	4.19526	4.18618	4.2	4.20426	4.2191	4.21458	4.21642	4.21991	4.21309	4.20975	4.2212	4.21409	4.21997	4.21955	4.22249	4.2281	4.23328	4.22925	4.23028	4.23014	4.23078	4.23022	4.22884	4.22428
28℃ pathogen+ 3	0	3.52648	3.88443	4.02144	4.12951	4.1503	4.24135	4.24841	4.27071	4.27562	4.29508	4.29485	4.29754	4.33304	4.32891	4.33897	4.34532	4.34319	4.35656	4.35723	4.36001	4.34263	4.35765	4.36082	4.36592	4.36313	4.36877	4.36183	4.37201	4.37768	4.37641	4.37568	4.38148	4.38039	4.38735	4.38027	4.38971	4.3818	4.38032	4.38182	4.3862	4.3958	4.3849	4.39279	4.38006	4.39186	4.38704	4.39067	4.38976
28℃ pathogen+ 4	0	3.45436	3.76935	3.91608	3.9775	4.01397	4.04544	4.07235	4.12197	4.12848	4.13186	4.14078	4.15201	4.15072	4.14775	4.18842	4.18252	4.18785	4.18476	4.18795	4.1965	4.19837	4.20599	4.20725	4.20594	4.21136	4.19932	4.20557	4.20424	4.213	4.23094	4.21824	4.21898	4.21855	4.21811	4.2248	4.23022	4.22813	4.2322	4.2187	4.22145	4.23165	4.22375	4.23593	4.23122	4.23181	4.23744	4.23897	4.23258
28℃ pathogen+ 5	0	3.29613	3.58723	3.69446	3.76909	3.7983	3.83794	3.87315	3.86826	3.88262	3.88821	3.92126	3.92763	3.91674	3.92413	3.94112	3.93028	3.95042	3.95654	3.96539	3.94996	3.96693	3.97698	3.99402	3.96904	3.98797	3.96889	3.97607	3.9742	3.99087	3.9793	3.97256	3.99572	3.99879	3.98465	3.99916	3.97887	3.99749	4.00006	3.99201	3.99039	4.00141	4.00082	4.00665	3.99072	3.99385	3.99757	4.00135	3.9951
28℃ injured 1	0	3.32839	3.63014	3.73607	3.80996	3.83213	3.86213	3.88893	3.89297	3.9281	3.93614	3.92831	3.9402	3.95851	3.95074	3.95164	3.95604	3.98197	3.96905	3.97974	3.97992	3.98524	3.97346	3.98303	3.99786	3.99547	3.99686	3.99584	3.99914	3.98697	4.00378	4.01211	3.99754	4.00227	4.0057	4.00922	4.00501	4.00313	4.00516	4.01017	4.00268	4.00135	4.01573	4.00678	4.0143	4.01018	4.01356	4.01247	4.01738
28℃ injured 2	0	3.50093	3.78076	3.90287	3.99766	4.05188	4.05555	4.07189	4.13006	4.10986	4.13452	4.15123	4.1598	4.16365	4.16617	4.1734	4.17932	4.18639	4.20746	4.1832	4.20126	4.199	4.20714	4.22252	4.20788	4.22466	4.2189	4.21118	4.22289	4.2093	4.21833	4.21398	4.21456	4.23551	4.22237	4.23093	4.24059	4.23708	4.23681	4.24007	4.24688	4.23588	4.23792	4.23824	4.23485	4.24171	4.24112	4.24361	4.24149
28℃ injured 3	0	3.42898	3.77468	3.84451	3.92137	3.95455	3.99152	4.01048	4.03948	4.05534	4.0615	4.05617	4.07177	4.08213	4.1013	4.08694	4.10192	4.10061	4.10786	4.0987	4.12859	4.11381	4.1241	4.11704	4.12964	4.13921	4.13665	4.1325	4.14328	4.14218	4.13512	4.14672	4.133	4.13801	4.15605	4.13898	4.1483	4.14009	4.14531	4.14474	4.14887	4.14968	4.14681	4.15177	4.14503	4.15761	4.15451	4.15339	4.1526
28℃ injure+pathogen 1	0	2.87245	3.09185	3.15462	3.2614	3.27009	3.32441	3.34488	3.35339	3.36666	3.37159	3.3938	3.39095	3.39766	3.40949	3.41665	3.42899	3.42963	3.43045	3.42334	3.43779	3.44578	3.44466	3.42995	3.44199	3.45147	3.44492	3.455	3.45992	3.46153	3.46076	3.45724	3.47093	3.46872	3.45806	3.46884	3.4677	3.45799	3.46333	3.47125	3.46747	3.47438	3.46518	3.47554	3.46702	3.4779	3.46522	3.47446	3.47871
28℃ injure+pathogen 2	0	3.5714	3.89568	4.04828	4.10887	4.16467	4.22317	4.24625	4.30514	4.30636	4.30744	4.32877	4.34227	4.33084	4.35188	4.36665	4.37046	4.40819	4.39045	4.38554	4.38679	4.40366	4.39435	4.40817	4.4066	4.41133	4.41488	4.42084	4.41579	4.41279	4.42432	4.4206	4.41621	4.42604	4.43692	4.42092	4.42805	4.44054	4.42932	4.43495	4.43938	4.43778	4.44637	4.42906	4.44405	4.43739	4.43671	4.44641	4.44607
28℃ injure+pathogen 3	0	3.49873	3.82787	3.98229	4.05198	4.09475	4.11341	4.14964	4.15294	4.20855	4.23399	4.2425	4.2453	4.24231	4.24311	4.26735	4.28809	4.27581	4.28249	4.28292	4.2932	4.28817	4.30465	4.29706	4.29906	4.30049	4.30985	4.31248	4.31414	4.31887	4.31482	4.32521	4.31861	4.33688	4.31982	4.32352	4.32714	4.31972	4.33471	4.33549	4.33172	4.33513	4.32752	4.34087	4.32967	4.32222	4.33349	4.33685	4.34062
28℃ injure+pathogen 4	0	3.44513	3.73711	3.91953	3.94263	4.02531	4.02327	4.06678	4.10682	4.11882	4.13309	4.15068	4.15265	4.16975	4.17111	4.1801	4.17727	4.18462	4.1861	4.20324	4.20907	4.20111	4.2009	4.21253	4.20805	4.23343	4.21539	4.22949	4.23328	4.22125	4.23663	4.22438	4.23028	4.23028	4.22931	4.23641	4.23115	4.22878	4.23361	4.2408	4.23136	4.24603	4.25099	4.24164	4.25884	4.24822	4.24871	4.25037	4.2536
28℃ injure+pathogen 5	0	3.58045	3.94406	4.11967	4.19375	4.21317	4.27626	4.31344	4.32802	4.32986	4.34492	4.37014	4.38229	4.38385	4.39189	4.39262	4.41111	4.40737	4.40374	4.41911	4.43053	4.4194	4.44018	4.44313	4.43065	4.44211	4.43792	4.43156	4.44636	4.44212	4.46482	4.45372	4.45289	4.45147	4.46134	4.44669	4.45662	4.46099	4.45731	4.45618	4.46569	4.46893	4.4673	4.46683	4.46366	4.46751	4.46869	4.4741	4.47534
[truncated: 1 more columns]

## Sheet: PD rarefaction curve
Name/reads	1	32	62	93	123	154	185	215	246	276	307	338	368	399	429	460	490	521	552	582	613	643	674	705	735	766	796	827	858	888	919	949	980	1011	1041	1072	1102	1133	1163	1194	1225	1255	1286	1316	1347	1378	1408	1439	1469
20℃ normal 1	0.464652	2.16375	2.6297	2.8823	3.08683	3.26396	3.3448	3.46696	3.51035	3.59691	3.66424	3.70173	3.73599	3.76824	3.83362	3.85308	3.86337	3.88238	3.91298	3.93	3.95065	3.98102	3.97796	3.9877	4.01898	4.02532	4.03824	4.04667	4.05706	4.08402	4.08987	4.07261	4.07368	4.10349	4.0796	4.10047	4.12388	4.13947	4.12516	4.14351	4.1689	4.16942	4.15794	4.16642	4.18584	4.1785	4.18971	4.20286	4.17108
20℃ normal 2	0.500419	2.01709	2.29817	2.51744	2.64331	2.79331	2.93874	3.09369	3.17783	3.21386	3.30796	3.38598	3.43021	3.48888	3.54418	3.60583	3.63356	3.68639	3.72344	3.79436	3.78452	3.85014	3.85002	3.89133	3.91933	3.92365	3.95168	3.97624	4.00658	4.00987	4.07725	4.07761	4.04595	4.08655	4.11901	4.14044	4.11261	4.1367	4.17336	4.16861	4.17811	4.21625	4.23115	4.2317	4.24911	4.2405	4.26089	4.26064	4.30171
20℃ normal 3	0.465595	2.18906	2.62527	2.90565	3.04058	3.2143	3.37098	3.46929	3.53786	3.63581	3.66295	3.76811	3.81803	3.90142	3.94839	4.0054	4.05062	4.05688	4.13117	4.14367	4.19635	4.22828	4.25314	4.2811	4.34359	4.3518	4.37274	4.43546	4.40451	4.47052	4.47176	4.50975	4.50982	4.51138	4.55247	4.55924	4.56212	4.60831	4.62659	4.62225	4.63592	4.67225	4.66896	4.68994	4.67192	4.71433	4.72064	4.75951	4.74672
20℃ normal 4	0.436698	2.16244	2.59006	2.80172	2.9731	3.15365	3.30259	3.40525	3.49336	3.5839	3.67348	3.70663	3.79748	3.8903	3.92164	3.9196	4.01994	4.03865	4.09189	4.10654	4.17469	4.16065	4.21954	4.24525	4.26115	4.33691	4.31392	4.34002	4.38302	4.36804	4.38429	4.40441	4.40357	4.43792	4.46724	4.47777	4.45963	4.50781	4.50198	4.54981	4.52893	4.52121	4.55245	4.54482	4.57561	4.57234	4.60627	4.55446	4.58747
20℃ pathogen+ 1	0.500835	1.904	2.18109	2.4124	2.56466	2.69229	2.85226	2.94159	3.01892	3.10767	3.19106	3.20154	3.23677	3.33264	3.37276	3.41974	3.43914	3.48765	3.52325	3.56526	3.63287	3.62866	3.6536	3.68478	3.7081	3.68449	3.76755	3.82752	3.79146	3.82616	3.8893	3.86804	3.85139	3.91313	3.86993	3.90288	3.92177	3.93428	3.94564	3.96719	3.99834	4.02508	4.01146	3.99661	3.9992	4.06036	4.08807	4.03878	4.10335
20℃ pathogen+ 2	0.462373	1.98851	2.37829	2.66166	2.78453	2.94153	3.09029	3.20959	3.40714	3.46481	3.52764	3.61904	3.71003	3.75766	3.81019	3.87323	3.87555	3.9753	4.01416	4.10223	4.12808	4.13355	4.15472	4.17698	4.22869	4.23614	4.30418	4.34015	4.3234	4.32633	4.37925	4.4002	4.42813	4.4511	4.47542	4.46743	4.50915	4.50361	4.54462	4.52814	4.53884	4.55853	4.58075	4.60013	4.59262	4.60521	4.61091	4.59852	4.61318
20℃ pathogen+ 3	0.50525	1.86655	2.13944	2.29056	2.44246	2.50868	2.61242	2.66787	2.73227	2.81949	2.86758	2.96142	2.97525	3.03183	3.06523	3.12429	3.14632	3.16171	3.22088	3.24947	3.2196	3.29576	3.30162	3.32956	3.38642	3.43858	3.42297	3.37151	3.4767	3.46635	3.48242	3.50231	3.49907	3.54212	3.59445	3.60571	3.58928	3.61902	3.58539	3.59744	3.66295	3.66282	3.65868	3.66781	3.70992	3.69245	3.7093	3.66855	3.7427
20℃ pathogen+ 4	0.510225	1.8809	2.16729	2.3259	2.41828	2.55673	2.62482	2.70611	2.82326	2.90222	2.8895	2.96208	2.99462	3.07957	3.15595	3.15919	3.25647	3.23451	3.25805	3.30129	3.32908	3.32941	3.3618	3.42784	3.39267	3.49539	3.50018	3.49054	3.52439	3.54613	3.58596	3.53989	3.62018	3.62825	3.65792	3.63443	3.67899	3.6947	3.68877	3.70104	3.69939	3.76477	3.75667	3.77788	3.80144	3.77935	3.77875	3.81328	3.82309
20℃ pathogen+ 5	0.493993	1.94713	2.23857	2.49374	2.65064	2.70261	2.86427	2.97703	3.04969	3.1563	3.25299	3.24201	3.30373	3.36369	3.38376	3.45428	3.51901	3.55187	3.59609	3.64649	3.66875	3.7029	3.70516	3.73861	3.76612	3.77387	3.80129	3.81474	3.84842	3.86879	3.86643	3.90047	3.9176	3.91321	3.95053	3.9759	3.97243	4.01766	4.02697	4.00762	4.013	4.03222	4.05357	4.04809	4.10113	4.09155	4.12069	4.11231	4.13147
20℃ injured 1	0.465157	2.22627	2.66329	2.90302	3.1129	3.25416	3.39133	3.51942	3.60231	3.71917	3.7771	3.82992	3.90157	3.92442	3.99284	4.02609	4.08048	4.07684	4.1248	4.17044	4.19779	4.21029	4.25468	4.28801	4.28427	4.30735	4.33355	4.35765	4.3337	4.36391	4.39416	4.41423	4.42348	4.45812	4.4567	4.46846	4.46271	4.47658	4.50321	4.5204	4.50754	4.53922	4.51001	4.53765	4.55888	4.55683	4.55366	4.54949	4.58723
20℃ injured 2	0.43743	2.18465	2.5328	2.81719	2.97878	3.12988	3.28083	3.34572	3.44278	3.51486	3.59275	3.60746	3.70099	3.67853	3.73493	3.77778	3.81802	3.83717	3.89831	3.90344	3.94118	3.94798	3.96112	3.97206	3.97485	4.0005	4.00924	4.01395	4.03729	4.04346	4.05626	4.07183	4.0712	4.10269	4.08164	4.07523	4.10072	4.13087	4.12311	4.12133	4.12008	4.12139	4.13615	4.15652	4.14567	4.15391	4.13449	4.16486	4.18009
20℃ injured 3	0.475207	2.00844	2.36862	2.64192	2.80026	2.99714	3.10581	3.20925	3.27147	3.35313	3.46737	3.48752	3.50842	3.64935	3.66025	3.72261	3.72174	3.80625	3.80457	3.86881	3.87407	3.91873	3.93683	3.96352	3.95784	4.00321	4.0234	4.03728	4.07828	4.10296	4.12869	4.13909	4.15439	4.18836	4.17574	4.23025	4.20045	4.23086	4.22839	4.27139	4.2955	4.31486	4.27182	4.25753	4.28819	4.3192	4.30703	4.34626	4.3906
20℃ injured 4	0.487765	1.87324	2.23289	2.4539	2.54949	2.67949	2.83498	2.85751	2.97258	3.0494	3.10244	3.22554	3.22585	3.30007	3.33041	3.34187	3.42516	3.45585	3.52631	3.49301	3.55169	3.58436	3.59009	3.64494	3.65953	3.70011	3.7216	3.72881	3.73916	3.76077	3.78604	3.82831	3.86297	3.86326	3.8625	3.91149	3.90301	3.8923	3.92332	3.95232	3.97372	3.95345	3.97403	3.97471	3.98521	3.97226	4.00377	4.00789	4.07634
20℃ injured+pathogen 1	0.593336	1.77611	2.17781	2.46918	2.67783	2.79571	2.92694	3.05712	3.12776	3.15145	3.27559	3.32342	3.39963	3.41587	3.44355	3.53667	3.54911	3.61615	3.64653	3.67821	3.6906	3.69788	3.76053	3.78859	3.77555	3.80861	3.83526	3.83746	3.87348	3.88791	3.91963	3.92652	3.9339	3.92804	3.95626	3.97418	3.97989	3.98652	3.9988	4.01604	4.027	4.0184	4.04824	4.06495	4.08202	4.07798	4.11763	4.1004	4.1222
20℃ injured+pathogen 2	0.657067	0.867147	1.01984	1.12933	1.24696	1.39623	1.40919	1.45088	1.53466	1.63732	1.62538	1.69961	1.81633	1.83122	1.80233	1.92856	1.94225	2.00819	2.05154	2.0257	2.07869	2.06066	2.0757	2.16667	2.17831	2.22204	2.26714	2.26685	2.21246	2.23297	2.3408	2.32254	2.37573	2.39064	2.3766	2.39776	2.39053	2.42987	2.40639	2.41833	2.45314	2.45864	2.46487	2.5095	2.51128	2.52773	2.56553	2.56487	2.58657
20℃ injured+pathogen 3	0.682438	0.739754	0.767831	0.772352	0.836672	0.911892	0.932088	0.901973	0.944543	0.995921	1.06811	1.02546	1.07202	1.11789	1.14605	1.11474	1.16702	1.19323	1.21708	1.2759	1.30682	1.28128	1.33676	1.33296	1.37126	1.38971	1.38581	1.45458	1.42934	1.45459	1.54482	1.43414	1.50513	1.50905	1.4897	1.55683	1.62882	1.5788	1.5598	1.63674	1.58292	1.61748	1.67658	1.68325	1.62951	1.71551	1.70273	1.72668	1.7292
20℃ injured+pathogen 4	0.653358	0.777995	0.835762	0.87199	0.938531	1.01904	1.05432	1.08016	1.10865	1.09587	1.16301	1.2245	1.18665	1.22464	1.24942	1.29323	1.39255	1.45606	1.39851	1.48727	1.46116	1.4409	1.47376	1.4539	1.44362	1.52804	1.62296	1.55762	1.59412	1.60259	1.61215	1.63722	1.60744	1.7275	1.72948	1.73412	1.72404	1.67999	1.78894	1.73349	1.81739	1.80668	1.81321	1.8858	1.81063	1.883	1.8083	1.84027	1.91785
20℃ injured+pathogen 5	0.646371	1.37846	1.60742	1.79321	1.88212	1.96094	1.9991	2.06352	2.1167	2.16709	2.21487	2.26351	2.27213	2.32441	2.33188	2.35517	2.39456	2.42446	2.46838	2.45299	2.48792	2.49284	2.54103	2.56155	2.58688	2.59949	2.58186	2.59954	2.62526	2.66061	2.66443	2.71649	2.69868	2.75207	2.7869	2.76218	2.8588	2.84718	2.81306	2.82431	2.85851	2.90728	2.85382	2.91254	2.93529	2.97661	2.92734	2.95691	2.96759
20℃ anti+pathogen 1	0.687302	0.72273	0.742032	0.750242	0.78	0.824313	0.812193	0.851989	0.868409	0.889236	0.926105	0.881418	0.934951	0.976335	0.948712	0.977692	0.951672	1.02037	1.01217	1.01921	1.00676	1.03955	1.04838	1.03291	1.09505	1.05332	1.08322	1.06861	1.09901	1.10943	1.11791	1.09651	1.12915	1.14562	1.14662	1.15061	1.14344	1.1588	1.14626	1.13862	1.13447	1.19469	1.1697	1.17054	1.18036	1.19546	1.21291	1.19953	1.19108
20℃ anti+pathogen 2	0.680462	0.705579	0.709057	0.715647	0.739703	0.751378	0.768075	0.779156	0.794994	0.801568	0.817998	0.849306	0.869741	0.845161	0.872814	0.855862	0.891852	0.917644	0.939641	0.946671	0.97297	0.946905	0.975039	0.996072	0.995381	0.99203	0.983229	1.06825	1.05246	1.07772	1.04435	1.02823	1.06069	1.06449	1.04661	1.10404	1.0719	1.12642	1.08768	1.12935	1.13093	1.17773	1.09289	1.14501	1.16601	1.17672	1.17312	1.15853	1.16054
20℃ anti+pathogen 3	0.687302	0.694908	0.704094	0.703912	0.707317	0.734545	0.740895	0.713934	0.741603	0.767038	0.745199	0.752152	0.750418	0.781615	0.766292	0.792782	0.783276	0.805248	0.821113	0.830205	0.796238	0.811946	0.816344	0.805774	0.806264	0.86231	0.846921	0.8616	0.857115	0.844292	0.887915	0.853336	0.873325	0.901761	0.892427	0.886028	0.876306	0.874429	0.886183	0.899751	0.929477	0.934151	0.914568	0.938574	0.965768	0.954736	0.935201	0.968121	0.959842
20℃ anti+pathogen 4	0.560593	1.48934	1.80993	2.05266	2.21096	2.34099	2.44486	2.55991	2.63318	2.70201	2.76913	2.76701	2.87397	2.87908	2.91696	2.94491	2.97263	2.99536	3.03514	3.04912	3.05342	3.10135	3.06579	3.10786	3.11718	3.13506	3.16968	3.1533	3.18434	3.21905	3.22377	3.22646	3.25359	3.24145	3.2604	3.25259	3.28416	3.26426	3.32191	3.2886	3.31813	3.32535	3.31437	3.31916	3.33784	3.34266	3.34931	3.36462	3.35535
20℃ anti+ 1	0.375824	1.8094	2.15881	2.3611	2.47858	2.54921	2.59916	2.65719	2.69084	2.76906	2.74004	2.78061	2.78639	2.7901	2.83542	2.83978	2.8689	2.84973	2.87227	2.90254	2.8979	2.8982	2.90867	2.93565	2.96418	2.93285	2.93735	2.95314	2.93926	2.94599	2.99947	2.96692	2.98168	3.01563	3.00186	2.9957	3.02096	3.01333	3.03543	3.02143	3.0042	3.05263	3.03154	3.01733	3.04185	3.03397	3.05178	3.02756	3.0314
20℃ anti+ 2	0.415429	1.62946	2.08722	2.36307	2.52045	2.69626	2.79816	2.8647	2.9217	2.97243	3.02902	3.10109	3.09378	3.11992	3.12977	3.15152	3.19807	3.22303	3.26847	3.24705	3.30339	3.2765	3.29526	3.31068	3.29125	3.34712	3.35215	3.34836	3.34804	3.37898	3.39293	3.37479	3.39549	3.41608	3.42127	3.40998	3.41781	3.43941	3.41009	3.43547	3.43107	3.46197	3.46639	3.44471	3.44024	3.45401	3.46871	3.44663	3.47126
20℃ anti+ 3	0.370617	1.66179	2.00443	2.32495	2.4199	2.59386	2.6735	2.7568	2.81957	2.83494	2.90099	2.93085	2.95139	2.98383	3.04237	3.02431	3.09356	3.08091	3.12924	3.10985	3.14734	3.17396	3.16295	3.20963	3.22831	3.24034	3.24546	3.24562	3.24851	3.28679	3.32137	3.31637	3.35552	3.32485	3.34553	3.34255	3.38708	3.3932	3.4148	3.38521	3.37048	3.40528	3.42351	3.4003	3.39165	3.40642	3.44784	3.46245	3.4672
20℃ anti+ 4	0.456435	1.4073	1.67613	1.96651	2.23821	2.36567	2.44614	2.57921	2.72112	2.76458	2.83943	2.89268	2.9967	3.02545	3.09903	3.15818	3.19684	3.17321	3.25998	3.24608	3.34453	3.34184	3.40897	3.37615	3.39832	3.45445	3.45573	3.49366	3.49831	3.51167	3.5146	3.52813	3.563	3.57017	3.5544	3.59778	3.59585	3.62971	3.60929	3.65396	3.64742	3.6495	3.64611	3.65995	3.6997	3.6768	3.69425	3.68895	3.70557
Name/reads	1	32	62	93	123	154	185	215	246	276	307	338	368	399	429	460	490	521	552	582	613	643	674	705	735	766	796	827	858	888	919	949	980	1011	1041	1072	1102	1133	1163	1194	1225	1255	1286	1316	1347	1378	1408	1439	1469
28℃ normal 1	0.285608	1.26149	1.48184	1.64108	1.69686	1.75101	1.81704	1.87016	1.90786	1.91149	1.9477	1.96216	2.02832	2.01928	2.07413	2.06703	2.09746	2.1077	2.14582	2.13636	2.13248	2.17433	2.18901	2.18703	2.21135	2.24488	2.20922	2.19958	2.27837	2.23187	2.23428	2.25987	2.25034	2.26828	2.28185	2.29788	2.31775	2.30603	2.34896	2.3216	2.31763	2.32161	2.32343	2.34798	2.35616	2.35316	2.38296	2.39176	2.37972
28℃ normal 2	0.25362	1.59247	1.96493	2.29764	2.44118	2.54077	2.64183	2.72523	2.72143	2.7724	2.8195	2.83493	2.90144	2.89858	2.92327	2.91821	2.93018	2.93615	2.97607	2.98274	2.98716	2.98115	2.97711	2.99595	2.99049	3.00544	3.00727	3.01109	3.02187	3.01416	3.03906	3.03319	3.03051	3.02425	3.03925	3.03563	3.04006	3.03613	3.04395	3.04757	3.05987	3.03778	3.0544	3.05483	3.05288	3.06084	3.05494	3.06295	3.07135
28℃ normal 3	0.253973	1.43938	1.79403	2.02974	2.17234	2.26574	2.32499	2.36085	2.38895	2.4181	2.42116	2.43269	2.44895	2.46558	2.48133	2.49171	2.49066	2.49684	2.49953	2.49836	2.50109	2.49992	2.51281	2.52013	2.5199	2.53554	2.53356	2.54171	2.52486	2.53475	2.54061	2.53597	2.52731	2.54846	2.54101	2.53907	2.55047	2.55269	2.55768	2.57653	2.57658	2.58711	2.55634	2.56242	2.56726	2.56922	2.56915	2.58451	2.57181
28℃ normal 4	0.248834	1.21072	1.49628	1.66534	1.80242	1.85151	1.93712	2.01237	2.02672	2.08309	2.09895	2.13139	2.14218	2.19664	2.17656	2.19001	2.21691	2.23282	2.23271	2.24677	2.25037	2.25431	2.26129	2.2575	2.26001	2.26962	2.2828	2.28408	2.27168	2.28295	2.30042	2.29381	2.2934	2.28796	2.29774	2.30046	2.30413	2.30707	2.3067	2.31703	2.31261	2.3071	2.31098	2.32216	2.32833	2.3337	2.33634	2.34109	2.3301
28℃ normal 5	0.268038	1.31989	1.70806	1.91888	2.04883	2.18794	2.30831	2.35682	2.38456	2.43524	2.48358	2.50783	2.55587	2.56234	2.59029	2.63592	2.61156	2.65133	2.62528	2.68722	2.65185	2.71261	2.72292	2.7078	2.72122	2.75129	2.7797	2.75721	2.78576	2.82077	2.77748	2.80518	2.81725	2.84912	2.83636	2.82097	2.86299	2.83954	2.88139	2.8678	2.87215	2.88745	2.88171	2.87331	2.88983	2.94369	2.91642	2.92002	2.92576
28℃ pathogen+ 1	0.275779	1.69767	2.06614	2.26436	2.43839	2.52598	2.59349	2.64006	2.68092	2.70916	2.75805	2.76854	2.78711	2.80678	2.82043	2.85909	2.86182	2.87774	2.89585	2.90311	2.923	2.90468	2.92886	2.95461	2.95919	2.96541	2.95171	2.96906	3.00949	3.00283	2.99184	3.01405	3.02935	3.03389	3.01862	3.04563	3.06445	3.03974	3.07591	3.06446	3.07369	3.07706	3.09453	3.08297	3.0982	3.1231	3.10036	3.10977	3.11234
28℃ pathogen+ 2	0.280503	1.67949	2.15169	2.42826	2.59642	2.72158	2.80712	2.91381	2.97572	3.00458	3.04507	3.07927	3.10638	3.13088	3.18684	3.19495	3.21612	3.24452	3.28861	3.28369	3.29865	3.32305	3.32883	3.32581	3.34595	3.35214	3.35716	3.36502	3.37601	3.41558	3.41277	3.43056	3.44977	3.45312	3.45337	3.46092	3.46232	3.47423	3.49972	3.46972	3.49366	3.49498	3.50087	3.52572	3.50899	3.53779	3.51545	3.52423	3.53157
28℃ pathogen+ 3	0.27278	1.69177	2.12527	2.346	2.54699	2.60589	2.68754	2.76285	2.77718	2.7966	2.83087	2.86917	2.86233	2.89078	2.89262	2.92208	2.89875	2.91403	2.93134	2.94047	2.93665	2.94364	2.94339	2.96198	2.94743	2.96309	2.95652	2.96569	2.97586	2.96284	2.97233	2.97052	2.96446	2.97349	2.97174	2.9729	2.99265	2.9729	2.98186	2.98946	2.99936	2.98854	2.97446	2.97757	2.97994	2.99436	2.99311	2.99064	2.9964
28℃ pathogen+ 4	0.276315	1.594	2.04148	2.26865	2.41508	2.56416	2.61087	2.71157	2.75192	2.80261	2.82366	2.84679	2.89398	2.92381	2.93357	2.96786	2.99858	2.9944	3.0421	3.06697	3.06002	3.05404	3.0884	3.07061	3.10541	3.10764	3.12436	3.14676	3.13193	3.16768	3.15842	3.16139	3.18706	3.20844	3.20155	3.22607	3.20225	3.22034	3.22785	3.22541	3.25585	3.26471	3.24732	3.25406	3.23975	3.25515	3.28253	3.27292	3.27685
28℃ pathogen+ 5	0.262517	1.54768	1.94501	2.12836	2.30177	2.32152	2.39999	2.48824	2.55124	2.58588	2.6193	2.69296	2.71313	2.73427	2.75086	2.78166	2.81158	2.81327	2.86773	2.87157	2.86047	2.90691	2.90642	2.92591	2.91961	2.98344	2.98162	2.97869	2.97155	2.99599	3.01877	3.03224	3.06489	3.04576	3.07238	3.05836	3.06945	3.07737	3.08486	3.07946	3.09984	3.10111	3.12691	3.13437	3.15227	3.11832	3.12538	3.1449	3.15053
28℃ injured 1	0.276078	1.47349	1.8613	2.14217	2.25772	2.32936	2.3855	2.45471	2.46935	2.55198	2.56425	2.61217	2.65144	2.69163	2.67151	2.7015	2.73341	2.7592	2.7913	2.78597	2.8168	2.80593	2.85259	2.85026	2.87093	2.90052	2.89543	2.91134	2.88852	2.93474	2.92579	2.92993	2.94089	2.94211	2.94494	2.95961	2.99953	2.94889	2.99588	3.00351	2.99246	2.98542	2.98835	3.02528	3.01218	3.00865	3.0423	3.03004	3.03343
28℃ injured 2	0.304147	1.51639	1.89283	2.10832	2.28462	2.45606	2.51382	2.59478	2.65895	2.68038	2.77696	2.78604	2.85828	2.90807	2.94011	2.96375	2.99799	3.0075	3.05513	3.07205	3.11769	3.14457	3.15534	3.15376	3.19501	3.20986	3.19188	3.2344	3.26728	3.28374	3.25924	3.27954	3.28147	3.3149	3.33243	3.36105	3.37787	3.36655	3.34367	3.38761	3.37783	3.37376	3.397	3.44553	3.38053	3.43632	3.42338	3.4594	3.46334
28℃ injured 3	0.270044	1.72908	2.12938	2.32287	2.43618	2.54202	2.64588	2.71892	2.7678	2.80999	2.82613	2.86119	2.8866	2.9165	2.94364	2.96348	2.97789	2.98314	3.00395	2.99803	3.00967	3.01706	3.04974	3.04501	3.06249	3.08109	3.06838	3.07273	3.08499	3.09619	3.09365	3.12485	3.10249	3.10935	3.12173	3.12371	3.12838	3.12655	3.13826	3.12523	3.14922	3.13156	3.15035	3.13758	3.14279	3.15945	3.16475	3.17546	3.15342
28℃ injure+pathogen 1	0.155473	1.25292	1.63576	1.84662	2.03467	2.16619	2.20541	2.34278	2.36973	2.40988	2.54754	2.55683	2.60959	2.70033	2.67016	2.68545	2.74476	2.75399	2.78683	2.8351	2.85223	2.87663	2.87252	2.89863	2.98329	2.91823	2.89315	3.01197	3.03063	3.0167	3.01543	3.01458	3.04648	3.00791	3.03979	3.09353	3.04812	3.05188	3.16745	3.13974	3.12147	3.136	3.15052	3.14063	3.14978	3.17184	3.17254	3.15902	3.2082
28℃ injure+pathogen 2	0.245125	1.5251	2.00972	2.32976	2.48828	2.75041	2.87702	2.95374	3.07399	3.13339	3.19417	3.2539	3.2986	3.27864	3.32583	3.39438	3.43928	3.45921	3.46426	3.49918	3.51484	3.52381	3.53499	3.54508	3.56728	3.58456	3.5741	3.62284	3.59855	3.61025	3.62996	3.64166	3.64126	3.66924	3.64446	3.65451	3.6761	3.69501	3.66842	3.67048	3.72079	3.71808	3.71485	3.72838	3.73489	3.74141	3.7237	3.73385	3.75117
28℃ injure+pathogen 3	0.303086	1.6155	2.00042	2.24841	2.39805	2.52858	2.64085	2.77182	2.79069	2.91945	2.98595	3.02182	3.06843	3.14405	3.13327	3.18452	3.22721	3.23381	3.25928	3.27015	3.29997	3.3179	3.32604	3.34806	3.32816	3.37224	3.37973	3.34718	3.37931	3.3853	3.38699	3.40533	3.40313	3.43231	3.41157	3.42795	3.42206	3.40447	3.431	3.42915	3.46097	3.45839	3.45705	3.45387	3.45345	3.45364	3.46285	3.4724	3.46163
28℃ injure+pathogen 4	0.247852	1.54785	1.96758	2.29574	2.46778	2.62328	2.69885	2.79169	2.86608	2.92463	3.01319	3.06552	3.08542	3.17481	3.19043	3.22587	3.23469	3.2982	3.2912	3.33428	3.35347	3.36982	3.36724	3.39413	3.43739	3.437	3.46894	3.45942	3.46021	3.4983	3.50011	3.49696	3.54989	3.51222	3.53027	3.55017	3.54432	3.57158	3.56249	3.58606	3.55777	3.59801	3.63374	3.61455	3.61405	3.62312	3.62121	3.62581	3.63505
28℃ injure+pathogen 5	0.22208	1.77679	2.21535	2.5218	2.66185	2.7563	2.86978	2.95464	3.00445	3.04745	3.06497	3.10202	3.14201	3.1541	3.19545	3.19672	3.23764	3.24476	3.22585	3.23008	3.24683	3.26357	3.30406	3.31894	3.2945	3.29326	3.31189	3.31651	3.31438	3.31309	3.33653	3.34172	3.34282	3.33892	3.34921	3.35796	3.34968	3.35395	3.3551	3.34312	3.3645	3.379	3.37095	3.36874	3.37464	3.3784	3.3797	3.39291	3.37157
[truncated: 1 more columns]

## Sheet: chao-1BC rarefaction curve
Name/reads	1	32	62	93	123	154	185	215	246	276	307	338	368	399	429	460	490	521	552	582	613	643	674	705	735	766	796	827	858	888	919	949	980	1011	1041	1072	1102	1133	1163	1194	1225	1255	1286	1316	1347	1378	1408	1439	1469
20℃ normal 1	1	29.7527	43.3914	48.4357	51.7418	59.504	59.9927	63.5462	64.8906	68.6814	70.7418	72.1982	73.3658	76.9699	78.0601	78.9909	81.4397	80.9983	81.293	83.1582	83.5321	84.3857	85.5364	85.3575	88.0573	89.4865	88.9657	92.5813	91.7477	94.6278	92.5493	95.953	95.4046	92.5684	96.2699	98.5865	101.128	99.0522	98.031	102.424	102.516	104.131	100.132	103.601	103.395	102.881	107.798	104.652	104.474
20℃ normal 2	1	26.2007	37.2381	41.7312	46.7324	56.1507	60.6842	67.6981	72.8083	74.7542	80.3214	86.6507	83.7026	85.9135	86.4566	92.3454	92.6452	93.3213	100.548	100.532	99.6908	101.988	98.4189	107.039	106.901	111.802	108.519	107.039	113.518	110.471	118.942	120.355	118.261	121.833	124.949	121.255	125.568	122.987	125.276	124.908	125.252	123.157	127.668	127.523	130.188	129.696	133.856	133.779	134.268
20℃ normal 3	1	35.1684	43.9529	49.7227	59.9527	65.5433	73.2447	77.1188	77.8592	88.4215	91.4225	93.068	97.717	99.4183	98.8826	109.128	107.591	114.711	111.075	116.687	120.396	117.382	119.16	126.623	125.696	129.512	126.741	132.818	134.601	137.39	137.012	133.594	141.303	141.36	144.389	139.534	143.469	144.556	146.272	147.271	144.743	153.635	148.544	146.882	148.995	150.828	160.659	158.114	156.371
20℃ normal 4	1	34.2066	44.627	56.3759	61.9653	72.5062	75.6777	80.156	87.9765	94.9265	94.8325	102.436	101.833	104.961	109.821	110.37	113.187	114.437	113.748	114.952	118.192	120.299	122.115	123.845	128.366	129.203	128.626	129.749	129.949	134.414	134.449	134.505	135.977	136.282	139.574	140.624	135.673	141.309	142.228	143.569	142.197	143.678	145.018	146.37	146.404	150.345	148.416	145.727	149.697
20℃ pathogen+ 1	1	23.4865	29.7919	39.4665	43.3514	48.7918	55.6338	55.8945	56.7092	62.4157	61.7545	63.8277	67.3623	67.4587	73.0283	69.8368	74.4518	76.1946	76.5924	80.1013	79.1564	83.3262	83.3595	83.7242	84.3913	86.9841	87.6903	86.1624	88.3978	93.4811	93.3441	89.0567	93.509	93.7252	100.692	93.4078	100.594	98.1999	101.218	97.839	102.331	101.59	105.304	102.553	106.173	103.702	109.652	108.11	108.78
20℃ pathogen+ 2	1	31.6583	45.1273	58.9351	67.834	75.9532	74.5882	83.1649	82.3344	86.8262	91.1906	95.7771	95.7242	101.256	100.778	102.93	106.312	107.173	106.427	106.89	109.573	112.259	113.997	113.714	114.27	114.101	115.493	116.944	121.335	117.733	120.276	119.688	120.799	122.289	120.814	123.231	121.828	122.527	122.791	123.884	126.299	125.435	124.805	126.318	124.724	127.283	128.914	128.86	127.054
20℃ pathogen+ 3	1	21.7145	27.6542	32.6379	39.5227	42.7093	47.4393	50.0871	56.6321	56.902	58.2863	60.5453	60.8396	66.1988	67.7086	69.3894	70.2491	72.5816	76.7107	75.8698	78.5996	77.688	77.6529	86.6624	90.5428	83.3616	90.683	89.351	94.1946	102.037	96.0613	102.207	94.7337	101.163	99.9265	103.879	96.8239	100.977	103.738	104.952	110.521	108.478	114.459	107.77	110.764	110.916	114.26	110.485	116.56
20℃ pathogen+ 4	1	22.7578	28.6032	32.9166	38.2191	50.8951	47.2137	51.03	53.6439	56.6073	63.1733	60.224	61.0674	67.2959	68.4978	72.8962	74.3654	75.1379	74.9348	77.6105	79.3015	81.9489	84.1374	85.3204	83.6709	86.3726	87.7728	90.2052	92.4766	90.858	89.8248	92.8376	95.4573	101.077	101.216	99.8341	99.9641	100.593	103.842	105.007	107.14	105.212	105.56	109.077	108.06	107.764	106.261	111.725	113.393
20℃ pathogen+ 5	1	28.4655	36.3392	45.3139	51.4135	51.9487	57.0253	62.6483	69.4079	70.2926	75.8715	75.8332	77.7823	80.217	82.651	91.352	86.9369	90.2894	96.8956	93.6831	94.3421	93.4207	94.0404	101.374	102.785	103.609	101.923	108.498	106.578	105.829	105.646	112.87	111.603	110.185	112.472	119.294	113.611	116.737	116.973	117.493	118.921	117.318	118.849	119.699	121.788	121.94	121.423	125.799	119.594
20℃ injured 1	1	38.2399	53.2231	62.4248	65.9239	71.7598	75.7416	79.6433	84.4387	88.6212	92.2677	93.3814	96.9045	98.5389	101.184	100.44	102.594	103.566	109.973	108.985	110.56	114.063	115.87	115.528	113.591	118.004	120.911	120.851	119.898	119.253	125.171	121.115	126.032	126.128	129.18	126.713	129.197	128.312	131.772	130.683	134.199	132.197	133.465	138.202	135.002	137.769	139.422	134.149	138.113
20℃ injured 2	1	42.6432	58.6096	65.7083	75.6914	78.3166	87.9686	90.5361	89.824	94.5361	97.6082	97.2448	98.5102	98.7774	99.6796	105.724	105.26	106.3	106.417	109.079	110.621	111.632	110.99	113.138	114.197	116.505	114.195	118.212	118.581	118.48	119.399	120.798	118.843	122.968	123.129	123.798	121.155	123.877	125.957	125.508	126.907	126.154	128.458	127.026	126.461	128.513	129.105	128.985	129.949
20℃ injured 3	1	30.6935	41.7163	56.4079	62.5828	67.4928	69.3996	79.7475	77.8193	81.0727	87.7606	88.0172	90.2358	96.0493	95.9714	98.6273	97.6647	109.318	107.735	107.605	108.975	111.515	112.354	111.256	113.359	116.245	116.574	116.988	116.683	122.029	120.778	121.433	123.333	123.172	126.431	126.576	126.699	127.988	133.74	130.187	133.29	133.359	131.865	130.829	134.856	131.365	136.5	134.395	135.438
20℃ injured 4	1	28.502	42.3365	47.4467	56.2653	60.2968	67.4172	69.3489	71.8714	76.999	79.494	82.4222	84.6653	84.09	88.6584	91.3465	89.7943	92.8274	93.6344	94.724	96.5947	97.3569	95.158	96.579	98.5298	101.625	102.817	101.239	101.318	103.984	105.54	105.546	104.934	106.719	108.91	107.751	111.36	109.959	111.575	112.122	115.022	111.67	111.609	111.508	117.119	115.355	115.185	117.277	116.793
20℃ injured+pathogen 1	1	24.2307	40.8679	49.4032	53.9902	58.2227	66.4413	68.1773	67.5465	73.6909	76.5677	77.5585	84.5194	80.7536	85.0447	85.1144	86.6561	90.8075	89.7903	91.2117	94.8843	91.0158	93.5616	95.3187	99.6309	98.8129	101.005	98.8784	98.5071	103.33	100.078	100.75	104.413	102.618	102.901	105.315	105.714	106.119	106.377	106.648	107.45	108.039	107.565	112.968	110.939	112.585	115.324	112.519	114.834
20℃ injured+pathogen 2	1	3.07	6.485	9.27833	13.32	15.8525	19.4925	23.0308	26.0133	26.3102	31.7328	30.8642	34.2364	36.9248	29.6475	36.8952	40.2308	41.3973	43.1869	42.3536	41.8915	48.9375	45.0172	43.113	45.5345	50.1195	55.6153	47.1885	50.5737	51.6181	48.1272	49.3078	52.2082	51.9107	54.3324	57.0792	56.4119	56.7222	52.7538	54.6695	53.3955	56.0961	55.4758	57.5196	58.5292	60.9422	59.5428	61.4195	59.441
20℃ injured+pathogen 3	1	1.53	1.94	2.25	3.83	3.81	4.83	4.91	5.525	7.66667	9.095	10.03	10.9133	12.235	14.71	13.1508	15.315	15.5025	17.2417	16.9483	19.6233	18.51	21.945	20.5637	23.5175	22.1537	23.3908	29.2103	30.1425	24.9831	29.586	27.355	30.38	29.9873	30.2682	32.6397	34.01	31.4428	34.0593	37.9572	33.2105	35.3568	38.5921	38.1688	34.529	38.027	36.8977	34.2005	36.892
20℃ injured+pathogen 4	1	2.63	3.7	5.5	7.08	10.2383	9.82833	12.2617	13.5008	15.4325	15.8658	19.14	19.551	24.8408	22.5275	23.834	32.2142	29.4262	32.8583	28.59	32.0071	29.5835	31.264	33.8183	33.148	30.5343	34.0673	33.959	37.9902	35.638	36.5778	35.3425	38.6459	38.3855	40.3743	41.6498	40.9011	43.2232	43.1055	40.7776	44.0226	42.9558	43.6484	43.485	45.7083	49.4961	45.4936	47.5917	47.5886
20℃ injured+pathogen 5	1	9.19667	12.5087	15.8823	22.6545	26.1128	27.0559	29.4318	32.831	31.2329	32.6377	41.4775	36.5861	39.5185	43.824	46.3561	44.2827	43.5977	47.5442	44.838	49.1912	51.6456	50.5208	52.1108	54.5213	54.1621	55.4446	55.6376	56.5657	61.2421	61.5978	62.5391	62.0903	62.2971	65.5217	62.6512	72.319	65.7491	68.8136	66.0571	66.6429	73.6711	68.8794	73.4639	71.9586	78.621	74.2193	76.2486	74.035
20℃ anti+pathogen 1	1	1.28	2	2.155	3.225	3.495	3.835	4.34	5.1725	5.445	6.28333	5.24667	7.85917	7.73083	8.34917	9.33833	8.6075	10.4042	11.5417	10.6367	11.3717	11.3662	12.0733	12.1092	12.7887	11.3442	13.0908	14.7325	14.0908	14.0133	15.7075	13.7575	16.8733	15.175	17.181	18.3308	16.0777	17.1892	18.4173	19.0947	17.5082	17.178	19.8283	20.7333	19.2832	19.346	21.0657	19.8662	18.6603
20℃ anti+pathogen 2	1	1.23	1.58	1.76	2.26	2.375	2.94	3.19	3.38	4.585	4.835	6.165	6.745	6.665	6.395	6.975	8.11	9.085	9.335	10.2	12.1083	11.5875	11.0508	11.7817	13.2667	13.1683	12.5925	15.3142	15.4783	18.5492	16.7483	18.0083	16.4317	16.9617	17.2275	21.4993	21.9317	18.71	21.4053	21.3225	18.932	22.6033	22.3925	21.3208	24.0478	21.8842	25.3013	24.3268	23.468
20℃ anti+pathogen 3	1	1.16	1.35	1.36	1.565	1.9	2.39	2.15	2.625	2.75	2.835	3.56	3.16	4.185	3.795	4.26	4.285	4.67	5.47333	6.275	5.49833	6.115	6.365	7.01833	6.21	7.155	7.71833	9.24833	8.57333	8.82833	9.835	9.11833	9.08	9.76	9.31667	11.015	8.905	11.425	11.3017	10.6467	11.5608	12.2317	11.86	11.9508	14.2783	12.6033	12.1408	14.5992	14.9625
20℃ anti+pathogen 4	1	23.0455	30.2828	39.338	42.6013	46.7729	47.0922	56.6408	51.798	53.3669	58.0248	57.3245	61.7753	60.4753	63.1229	66.4849	67.6037	68.3195	68.0402	71.157	72.3193	72.617	73.1174	74.9208	77.712	77.8473	76.2077	73.7953	77.4704	82.6719	78.4686	82.4267	81.9806	80.2197	82.1106	84.8183	82.0347	83.6819	83.1392	83.8223	83.7643	86.3147	86.662	85.6971	85.7057	87.2111	87.2063	86.8468	88.6087
20℃ anti+ 1	1	33.1222	43.759	51.2721	56.035	58.4409	61.4781	65.0832	67.9638	67.8244	67.6639	70.0864	69.9007	73.1737	73.9149	75.4021	76.1176	76.7937	79.5137	79.0732	80.1953	79.9794	81.6144	82.4141	82.2018	82.4727	84.004	86.5437	85.9235	83.9914	87.1838	88	87.0077	88.6266	88.7185	89.3436	88.5946	90.6855	90.299	89.9305	91.1154	92.6156	92.2541	90.916	91.3059	92.055	91.2835	91.0029	91.8008
20℃ anti+ 2	1	31.1848	38.2081	43.715	48.903	50.9256	52.843	53.7966	58.7688	60.3198	60.7245	68.1154	68.2718	69.3564	75.0711	73.1201	75.5624	73.6581	76.8241	76.6225	79.0691	77.8906	82.0661	84.4433	83.1663	86.4064	84.8148	85.4432	80.5902	86.463	88.2142	86.8803	83.4533	90.4222	88.4127	89.9544	90.0706	87.5246	90.6065	92.752	89.2002	93.4306	93.7237	93.454	91.5902	94.0002	91.5129	93.5543	92.3118
20℃ anti+ 3	1	36.6891	44.2382	49.6183	52.4614	57.86	64.098	62.2235	67.0844	66.5966	68.8827	69.8518	73.7699	71.7066	72.4579	75.4346	76.1969	76.7485	78.8014	79.3844	77.0695	78.3433	80.517	83.2133	81.2122	83.0438	83.6512	83.2017	83.1759	83.8066	86.0784	86.8046	86.7798	87.196	88.1395	86.9979	89.4487	87.6682	88.0353	88.793	89.1148	87.5575	91.4283	90.5996	92.4336	91.7868	91.8173	91.8767	90.1751
20℃ anti+ 4	1	30.6675	46.2117	54.8217	60.9605	62.7104	66.8065	69.9654	76.664	76.5607	80.6055	78.1444	82.9677	84.7901	85.8678	88.4109	89.6901	89.8568	90.3809	92.8168	93.9292	92.2356	94.4215	93.8486	96.1528	97.366	97.6782	98.5482	97.9782	99.2999	98.495	102.685	100.286	103.48	101.162	102.599	103.055	105.584	103.655	105.452	104.883	105.908	104.203	104.648	106.824	105.844	104.997	108.43	107.589
Name/reads	1	32	62	93	123	154	185	215	246	276	307	338	368	399	429	460	490	521	552	582	613	643	674	705	735	766	796	827	858	888	919	949	980	1011	1041	1072	1102	1133	1163	1194	1225	1255	1286	1316	1347	1378	1408	1439	1469
28℃ normal 1	1	19.7987	25.5563	29.2258	30.2822	31.0994	33.4402	33.4838	36.162	36.954	35.5142	39.2691	39.1362	40.2096	41.1424	41.8072	43.3865	42.07	43.9276	46.2349	44.6083	48.4659	46.4809	47.4297	47.9011	49.9153	49.5935	48.1646	50.4571	47.9916	52.0342	51.8053	49.685	53.1237	56.9312	53.6675	53.3145	55.8963	55.2837	54.3497	54.3524	55.069	56.7851	55.6445	62.2473	58.8091	55.9428	58.9194	58.985
28℃ normal 2	1	29.5978	33.7336	37.9693	41.196	41.6385	43.138	44.4018	44.0496	45.3998	46.3967	47.2203	48.3877	48.7395	50.4229	50.4942	51.9345	52.1063	51.6911	53.2826	53.8143	59.5755	56.3536	57.7913	57.5961	60.279	61.5049	61.1478	62.7019	62.112	64.5332	66.9698	64.2554	66.8532	64.0343	68.1453	66.9041	68.2889	69.4911	68.9481	69.2254	68.3176	74.2035	69.8763	72.998	73.3178	71.2105	74.6524	72.8062
28℃ normal 3	1	26.5997	30.0099	34.4445	38.476	38.2255	39.0481	39.7609	43.0772	42.3339	44.002	43.3356	44.972	44.8867	46.4416	45.9859	46.9875	46.558	48.8852	47.3213	49.0373	48.8041	50.5567	53.2716	51.342	53.231	53.0768	57.0873	57.0549	56.1997	58.2117	59.2511	60.4444	59.8985	61.507	59.7742	62.2958	64.8238	63.1392	67.9242	66.2827	64.7625	69.0322	66.9958	65.5496	66.258	68.4441	64.112	65.337
28℃ normal 4	1	22.1938	27.8395	31.7826	35.0155	36.5202	35.949	40.184	40.0107	40.6173	40.3367	40.2712	42.0407	42.196	44.0593	43.0014	42.7183	44.972	44.8628	44.0727	47.0077	46.6382	47.2907	47.0732	48.9281	49.1898	49.856	49.7772	50.8139	50.7407	50.7117	52.019	52.8143	52.9117	51.8047	55.256	54.7049	55.1727	54.1088	56.589	57.9767	56.217	56.8715	56.7213	56.9643	58.8901	62.0589	61.549	57.5513
28℃ normal 5	1	21.4697	31.7255	35.8057	34.1782	37.9211	38.2548	39.7978	41.355	41.8501	42.5718	44.8205	44.9998	46.1795	47.4382	48.3593	48.464	49.5387	50.7906	51.5398	51.3915	52.9586	55.0583	56.3758	54.9017	57.8606	57.3081	58.007	60.0151	59.2009	58.9242	60.5481	61.2853	63.1065	61.3961	60.2947	61.2211	65.0113	65.0149	63.6841	63.1074	65.3854	61.7713	64.9688	66.0559	64.2145	67.3623	65.0355	66.8443
28℃ pathogen+ 1	1	26.3088	33.4246	36.6428	41.7226	40.8685	42.4129	45.6341	46.8496	47.3083	47.9733	47.6092	49.4703	49.5467	52.2903	50.4654	52.948	52.6594	53.2837	55.8559	56.3339	54.8847	56.2482	59.7804	58.9783	60.4199	60.3659	62.828	62.7313	63.8658	62.7042	64.669	66.207	65.7438	68.4633	68.6346	71.4762	69.7636	68.5714	72.8057	71.3925	71.9382	68.5567	72.813	73.8806	74.0144	73.3291	75.4861	74.5777
28℃ pathogen+ 2	1	27.2347	35.0215	38.8548	40.3241	40.8556	42.2588	44.9821	46.2947	46.0489	46.4411	47.1398	47.9848	48.1708	49.501	50.0806	50.2408	50.3876	51.6993	51.5932	50.9898	53.2243	52.5195	52.3511	53.408	53.0264	53.1047	53.6397	54.2373	54.8085	53.822	55.0826	55.5479	56.0128	55.1004	55.9452	58.7719	56.5833	57.0187	56.4715	56.6221	57.2769	56.6286	56.7092	57.7432	57.0781	56.7674	58.3161	57.8523
28℃ pathogen+ 3	1	28.0761	37.7719	37.9492	43.612	45.8939	46.8896	47.3105	50.6357	47.6824	50.2144	49.9339	49.1218	50.9418	50.2784	51.5167	51.7314	53.0386	54.027	52.2843	52.7544	53.7698	54.6452	55.6141	55.9929	55.9766	56.9462	56.8964	58.3471	58.8036	59.2462	60.9918	59.4286	58.7661	62.1188	60.7963	61.0894	62.2704	62.3949	63.669	63.8855	64.3247	64.7116	65.3676	65.5168	67.9472	68.1316	66.2697	66.84
28℃ pathogen+ 4	1	27.7419	32.257	39.9554	39.3572	43.4955	43.2945	44.9036	46.6025	47.4963	48.4838	49.7035	50.0819	50.3149	51.6616	53.1539	55.8816	56.2715	52.4621	55.0738	56.7804	55.2721	56.8235	56.5092	59.1598	58.3013	57.8535	61.1924	60.3009	62.7478	59.945	61.0739	61.7247	62.2857	61.6817	63.6533	62.2033	63.9188	65.0646	63.6265	64.9068	65.4217	66.2285	67.2069	64.7634	67.326	65.2221	68.555	67.5291
28℃ pathogen+ 5	1	23.3693	30.5687	34.8614	36.7123	37.3774	40.988	41.4385	43.0981	43.9919	44.0693	46.9043	45.6214	47.8453	48.1161	49.6403	49.2063	50.4398	52.6282	54.2594	52.3993	52.6886	53.2252	55.404	53.4322	57.4069	53.3628	58.4922	57.7793	57.3244	59.3437	59.2531	58.1819	61.577	61.4003	60.7376	60.7178	61.817	61.0732	61.5628	62.1373	63.9615	63.7827	63.5693	63.9739	64.078	65.2126	65.6715	64.3273
28℃ injured 1	1	24.1467	28.105	32.0053	33.1055	34.4474	35.7462	37.9012	38.5483	38.3372	39.3367	39.6883	42.5628	42.4856	46.1047	43.7112	46.019	46.4755	46.6151	46.9315	47.4855	49.8521	48.9275	50.9514	49.1858	52.1578	51.5042	52.4349	51.9537	52.8944	56.1307	53.8996	52.7951	55.4899	54.5275	55.332	56.5269	58.5064	59.3132	59.5639	60.612	57.6063	58.4697	63.8582	59.6382	60.5508	60.5055	60.9814	62.8632
28℃ injured 2	1	22.6689	29.9604	33.6067	38.1815	43.7617	44.4021	44.1	47.8229	47.5016	49.0937	50.8138	49.9278	52.5705	54.482	53.4739	52.7956	52.5023	55.3716	55.8361	57.2561	54.627	58.3275	57.4376	58.0554	59.2121	58.3297	59.6375	61.5903	59.9199	60.8954	61.0807	59.3778	63.8732	61.0038	62.6108	62.5994	64.0175	63.5276	63.0739	63.9943	64.1259	64.4972	67.5476	64.3768	65.3877	65.5082	68.0511	68.4327
28℃ injured 3	1	23.6992	30.8323	35.5886	37.161	39.019	39.9576	41.7587	43.5631	43.898	44.2468	44.6948	45.5093	48.1054	49.2193	48.5438	49.2639	47.8132	52.2235	48.8602	52.0682	52.9759	52.9168	52.9177	55.935	56.8642	55.3377	57.3579	55.7404	57.9024	55.7891	58.9943	60.3618	59.2998	60.8847	58.7628	61.563	59.0288	62.2991	60.6827	63.2892	61.0938	60.7658	62.3327	60.6224	63.3893	61.6515	64.4093	64.6865
28℃ injure+pathogen 1	1	20.0063	25.8697	30.3821	34.4013	34.9394	37.2867	40.1722	41.3544	42.6925	42.4461	42.9493	45.1905	48.5212	44.3436	47.7012	48.8523	48.2164	49.4138	49.9053	53.2018	52.8931	51.2923	53.6371	54.4357	53.7395	53.811	55.6047	60.2607	57.9414	58.6344	59.3817	61.1418	57.5341	61.237	63.2763	63.9605	64.0434	64.0785	63.457	68.0974	66.9416	65.2401	70.3617	71.4082	68.2627	66.5882	69.1585	71.5409
28℃ injure+pathogen 2	1	29.484	40.4766	47.8897	47.2427	50.0677	52.1065	55.827	56.5479	55.6491	58.5443	60.1154	61.4297	60.1493	60.9366	63.7619	63.6186	64.7271	66.9654	67.0171	67.1254	69.9384	68.8921	70.5202	70.8775	72.6741	71.4884	73.4505	73.5111	74.4926	76.7707	75.7871	75.7385	79.2397	78.8909	79.4162	80.1928	82.1199	79.1855	80.9556	81.8259	82.2697	85.6808	85.9411	83.8994	84.3375	86.0337	88.3431	88.0098
28℃ injure+pathogen 3	1	26.5245	37.7382	39.9881	45.6589	45.6373	48.1135	48.9917	48.4222	53.1972	53.4782	53.7516	54.8887	55.4149	53.3302	55.4496	57.4857	56.8473	58.3585	57.4223	59.833	59.5245	59.733	59.6686	60.6294	60.5359	62.2815	60.9903	62.2182	62.9983	62.7873	64.4077	63.8678	67.2482	64.3479	67.2534	66.8719	64.9871	66.4143	67.6355	67.4901	69.3959	67.0263	70.0269	69.3759	68.3874	71.3489	72.8947	70.576
28℃ injure+pathogen 4	1	26.4275	33.9447	40.0685	42.7441	45.4727	48.4968	53.1768	51.3627	53.1437	56.3592	56.4483	60.6336	58.8064	61.9692	61.1373	61.5067	63.2807	62.5402	64.8033	65.709	68.6392	65.1547	71.7242	67.2612	70.2674	69.4327	71.1253	71.0106	73.2928	76.2613	74.4819	74.6078	74.6144	74.0599	77.6319	78.368	78.0176	78.8954	76.8642	76.1971	82.2307	81.3627	82.38	82.8935	83.9888	82.1227	84.0399	83.2373
28℃ injure+pathogen 5	1	27.9793	34.3388	41.1607	42.9111	45.3592	48.5532	49.9696	51.0632	52.9162	55.4059	55.2319	56.6521	55.268	57.266	57.802	58.1058	59.4373	60.9513	60.5375	62.4639	60.7507	64.0161	62.7855	65.8174	65.1064	66.7881	66.5381	68.3509	65.5114	69.8873	69.6035	73.4216	72.8254	73.6555	74.5306	74.8001	75.1931	73.3749	73.9726	75.0148	75.7823	81.9398	80.3568	77.8067	79.222	83.4119	82.0083	80.6899
[truncated: 1 more columns]
